# Supplementary material
Source: publisher figshare collection journal article supplement (https://acs.figshare.com/ndownloader/files/5396162)
Supplement: Supplementary file 1 [file 5396162]

## Sheet: Quantified proteins
Table 5. Supporting Information. SILAC ratio (log2) related to control (si-ATG5 - si-NC) of proteins quantified in triplicate experiments. Cells were nucleofeced with si-ATG5 or si-NC.
id (MaxQuant)	Protein IDs (UniProt)	Protein names	Gene names	si-ATG5-si-NC	si-ATG5	si-NC	si-ATG5-si-NC>0.4699?	si-ATG5-si-NC<-0.5315?	PEP (Posterior Error Probability)	Intensity	Peptides	Unique peptides	Peptides ATG5_1	Peptides ATG5_2	Peptides ATG5_3	Peptides NC_1	Peptides NC_2	Peptides NC_3	Unique peptides ATG5_1	Unique peptides ATG5_2	Unique peptides ATG5_3	Unique peptides NC_1	Unique peptides NC_2	Unique peptides NC_3	Sequence coverage [%]	Mol. weight [kDa]	Sequence length	Ratio H/L count ATG5_1	Ratio H/L count ATG5_2	Ratio H/L count ATG5_3	Ratio H/L count NC_1	Ratio H/L count NC_2	Ratio H/L count NC_3	Sequence coverage ATG5_1 [%]	Sequence coverage ATG5_2 [%]	Sequence coverage ATG5_3 [%]	Sequence coverage NC_1 [%]	Sequence coverage NC_2 [%]	Sequence coverage NC_3 [%]	Intensity ATG5_1	Intensity L ATG5_1	Intensity H ATG5_1	Intensity ATG5_2	Intensity L ATG5_2	Intensity H ATG5_2	Intensity ATG5_3	Intensity L ATG5_3	Intensity H ATG5_3	Intensity NC_1
4033	Q01995;E9PC82;H0YCU9;E9PJ32	Transgelin	TAGLN	2.00068	1.2642	-0.736475	yes	no	2.1091e-103	1280000000	7	7	4	5	6	3	5	3	4	5	6	3	5	3	34.8	22.611	201	15	17	21	12	17	10	15.4	20.4	29.9	9	20.4	10.9	8.51745	8.41661	7.83381	8.46516	8.34661	7.84334	8.558	8.46177	7.85632	8.00436
3846	P61812-2;P61812	Transforming growth factor beta-2	TGFB2	1.3358	3.69329	2.35749	yes	no	6.4718e-13	126970000	3	3	2	2	2	1	1	1	2	2	2	1	1	1	4.1	50.573	442	6	5	6	3	5	3	2.3	4.1	2.3	2.3	2.3	2.3	7.71111	7.69428	6.29088	7.47911	7.46745	5.90295	7.33508	7.31608	5.96666	6.84127
2833	P00352;E7ER57;H0Y4S2;Q5SYQ8;Q5SYQ9;Q5SYQ7	Retinal dehydrogenase 1	ALDH1A1	1.22631	1.58251	0.356199	yes	no	0	43172000000	34	31	30	33	32	27	26	25	28	30	30	25	24	23	71.1	54.861	501	128	119	129	86	90	79	70.7	70.5	70.1	67.5	69.9	67.7	9.9218	9.83891	9.1617	9.91589	9.81691	9.22508	9.99877	9.92536	9.19058	9.71144
3413	P35354;Q6ZYK7	Prostaglandin G/H synthase 2	PTGS2	1.14743	0.553363	-0.594071	yes	no	3.6353e-28	314250000	7	7	3	6	5	2	2	3	3	6	5	2	2	3	19.4	68.995	604	3	6	5	2	3	3	9.1	16.7	15.9	5.5	5.5	9.1	7.63059	7.47226	7.11561	7.7968	7.5966	7.36423	7.97041	7.84848	7.35921	7.35911
6737	Q9UP65	Cytosolic phospholipase A2 gamma	PLA2G4C	1.11674	-0.0422242	-1.15896	yes	no	1.4519e-11	185140000	2	2	2	2	2	1	2	2	2	2	2	1	2	2	5.5	60.938	541	2	2	2	1	2	2	5.5	5.5	5.5	2.2	5.5	5.5	7.56124	7.3384	7.1648	7.4797	7.18971	7.16735	7.677	7.45352	7.28151	7.20718
3066	P13497;P13497-6;P13497-2;P13497-5;P13497-4	Bone morphogenetic protein 1	BMP1	1.11409	1.97285	0.858757	yes	no	0.000336	129640000	1	1	1	1	1	1	1	1	1	1	1	1	1	1	1.1	111.25	986	3	3	2	2	1	2	1.1	1.1	1.1	1.1	1.1	1.1	7.30233	7.2257	6.51111	7.60928	7.49449	6.97528	7.49959	7.44869	6.54335	7.32247
1162	Q01201;D6R992	Transcription factor RelB	RELB	1.09992	0.301995	-0.797926	yes	no	1.0156e-08	30349000	2	2	2	2	2	2	2	2	2	2	2	2	2	2	1.7	62.134	579	5	5	7	5	7	4	1.7	1.7	1.7	1.7	1.7	1.7	6.9476	6.77823	6.4567	6.63215	6.37557	6.28158	6.94901	6.77822	6.46108	6.53957
3098	P15090	Fatty acid-binding protein, adipocyte	FABP4	0.984509	-0.0490732	-1.03358	yes	no	2.7588e-36	1017500000	6	4	5	4	5	4	3	5	3	2	3	3	2	3	47.7	14.719	132	8	9	8	7	2	4	47.7	40.9	47.7	40.9	25	31.8	8.26916	8.11614	7.74187	8.03973	7.78082	7.69207	8.45217	8.26611	7.99432	8.17505
3247	P23510;Q8IV74	Tumor necrosis factor ligand superfamily member 4	TNFSF4	0.932486	-0.159112	-1.0916	yes	no	1.7389e-23	1559900000	5	5	5	5	5	5	4	3	5	5	5	5	4	3	20.2	21.05	183	10	11	8	5	8	5	20.2	20.2	20.2	20.2	20.2	19.7	8.49602	8.29826	8.05922	8.54686	8.30118	8.18239	8.56915	8.35955	8.15217	8.16806
2959	P08253;E9PE45;B4DWH3	72 kDa type IV collagenase;PEX	MMP2	0.917438	1.1566	0.239157	yes	no	3.5781e-119	2803800000	15	15	12	12	12	9	11	9	12	12	12	9	11	9	24.1	73.881	660	33	36	35	32	37	30	20.8	22.3	18.9	15.8	17.6	15.8	8.71754	8.60298	8.08275	8.65516	8.52231	8.07598	8.83843	8.73549	8.1628	8.56562
2344	O14531;Q5T0Q6	Dihydropyrimidinase-related protein 4	DPYSL4	0.917036	-0.622743	-1.53978	yes	no	7.3298e-52	450440000	4	4	3	4	3	3	3	3	3	4	3	3	3	3	12.4	61.877	572	6	8	5	5	6	6	11.2	12.4	11.2	11.2	11.2	11.2	7.87377	7.54234	7.60116	7.81074	7.43824	7.57107	7.92065	7.65632	7.57952	7.89951
2860	P02751;P02751-15;P02751-3;E9PE77;P02751-7;P02751-8;P02751-14;P02751-9;P02751-6;F8W7G7;P02751-5;P02751-10;E7ERA1;P02751-11;P02751-13;P02751-4;P02751-12;H0Y7Z1;E9PG29;P02751-2;H0Y4K8	Fibronectin;Anastellin;Ugl-Y1;Ugl-Y2;Ugl-Y3	FN1	0.860905	0.819241	-0.0416635	yes	no	0	156390000000	95	95	88	88	89	81	77	79	88	88	89	81	77	79	53.5	262.62	2386	351	347	364	294	289	288	50.1	48.2	50.9	46.1	42.8	45.3	10.4372	10.3073	9.84965	10.4746	10.3234	9.94285	10.5465	10.4263	9.92973	10.2916
2871	P03956	Interstitial collagenase;22 kDa interstitial collagenase;27 kDa interstitial collagenase	MMP1	0.859635	0.737735	-0.1219	yes	no	1.985e-17	167180000	5	5	3	3	3	3	1	2	3	3	3	3	1	2	16.4	54.006	469	3	5	4	3	1	3	6.4	11.3	11.3	7.2	2.3	9.4	7.30125	7.16119	6.7416	7.55255	7.38057	7.06707	7.65183	7.5055	7.10826	7.2915
2053	P02462;P02462-2;F8WEC9;E7EQD0;P29400-2;E7EVY4;P29400	Collagen alpha-1(IV) chain;Arresten	COL4A1	0.85756	0.808766	-0.0487942	yes	no	8.2604e-46	8709200000	5	5	4	4	4	4	4	4	4	4	4	4	4	4	5.5	160.61	1669	14	12	16	11	13	15	4.3	3.6	4.3	4.3	3.6	4.3	9.21888	9.08849	8.63273	9.23155	9.07368	8.7155	9.17528	9.05865	8.54734	8.76948
1196	Q99715;D6RGG3;Q99715-4;Q99715-2;C9JLI9;H0Y5N9;H0Y4P7;H0Y991	Collagen alpha-1(XII) chain	COL12A1	0.856242	1.40859	0.552347	yes	no	5.386e-123	1504300000	21	21	14	11	14	7	5	9	14	11	14	7	5	9	10	333.14	3063	19	20	17	11	8	14	6.3	4.7	6.8	2.6	2	4.2	8.45612	8.36764	7.72168	8.45521	8.29885	7.93568	8.51338	8.43214	7.74537	8.14117
3625	P49888;H0Y8G0	Estrogen sulfotransferase	SULT1E1	0.853917	2.2425	1.38858	yes	no	1.127e-29	1128700000	9	9	6	4	5	2	3	4	6	4	5	2	3	4	37.1	35.126	294	7	4	5	2	2	4	27.9	18	20.4	11.9	14.3	18.7	8.27166	8.22652	7.26586	8.40107	8.34177	7.50717	8.44713	8.39396	7.50876	8.0616
4007	Q00653;Q00653-4;Q00653-3	Nuclear factor NF-kappa-B p100 subunit;Nuclear factor NF-kappa-B p52 subunit	NFKB2	0.843573	0.636055	-0.207518	yes	no	4.4394e-62	878790000	8	8	6	4	5	4	4	2	6	4	5	4	4	2	17.6	96.748	900	10	6	8	7	8	5	12.8	7.9	10.1	8.7	9.6	3	8.20523	8.05289	7.67636	8.22134	8.02111	7.78877	8.29734	8.14572	7.76669	8.03141
3496	P42330;Q04828;P17516;H0Y804;A6NHU4;P52895;B4DK69;B5ME26;E9PBP5;B4DKR9	Aldo-keto reductase family 1 member C3;Aldo-keto reductase family 1 member C1;Aldo-keto reductase family 1 member C4	AKR1C3;AKR1C1;AKR1C4	0.824618	-0.906044	-1.73066	yes	no	6.7489e-99	1161300000	11	11	4	4	3	6	5	6	4	4	3	6	5	6	45.2	36.853	323	3	4	4	6	5	6	18.3	18.6	15.8	26.9	21.1	25.7	8.14355	7.79586	7.88465	7.99614	7.63333	7.74919	8.05088	7.69779	7.79637	8.34124
2903	P05362;E9PER2;E7ESS4	Intercellular adhesion molecule 1	ICAM1	0.811118	1.32034	0.509224	yes	no	2.3303e-24	1126500000	4	4	3	3	4	3	3	2	3	3	4	3	3	2	13.3	57.825	532	3	3	5	3	3	2	7.1	7.1	13.3	7.1	7.1	4.5	8.30376	8.21213	7.58305	8.5267	8.41833	7.87073	8.36342	8.26628	7.66536	8.02506
1360	Q8NC01;E9PFB4;E7ESV9	C-type lectin domain family 1 member A	CLEC1A	0.810493	0.45356	-0.356933	yes	no	0.00014083	304720000	1	1	1	1	1	1	1	1	1	1	1	1	1	1	3.9	31.952	280	3	3	1	5	2	3	3.9	3.9	3.9	3.9	3.9	3.9	7.77334	7.5949	7.3009	7.73993	7.55096	7.28744	7.52116	7.36819	6.99373	7.6769
1285	E7EPD1;P08572;A2A352	Collagen alpha-2(IV) chain;Canstatin	COL4A2	0.807224	0.527575	-0.27965	yes	no	5.1712e-115	13405000000	11	11	10	10	9	10	9	9	10	10	9	10	9	9	11.3	168.04	1712	37	30	30	28	31	32	9.3	9.3	8.8	10.7	8.2	9.7	9.44379	9.30214	8.88833	9.36964	9.1882	8.90302	9.42659	9.29206	8.85208	9.1113
6411	Q9NX02;Q9NX02-2;Q9NX02-4;Q9NX02-3	NACHT, LRR and PYD domains-containing protein 2	NLRP2	0.806959	-0.575119	-1.38208	yes	no	7.3834e-21	149390000	3	3	2	1	1	2	2	1	2	1	1	2	2	1	4.5	120.51	1062	4	2	2	1	3	2	2.8	1.2	1.2	2.9	2.8	1.2	7.32019	7.00685	7.03113	7.48146	7.28153	7.0484	7.39721	7.09328	7.09906	7.44045
2897	P05120;E7EPJ9;E7ERB5;E9PDK7	Plasminogen activator inhibitor 2	SERPINB2	0.795424	-2.38245	-3.17787	yes	no	9.2927e-72	2026500000	11	11	7	10	10	6	10	9	7	10	10	6	10	9	26.5	46.596	415	21	25	25	14	22	18	14.2	22.9	26.5	13.7	22.9	22.9	8.42002	7.85087	8.28355	8.61788	8.03137	8.48763	8.57887	8.04242	8.42964	8.46745
6205	Q9HB63;Q9HB63-2;Q9HB63-3;F8W0I7	Netrin-4	NTN4	0.777511	-0.575022	-1.35253	yes	no	4.472e-38	1005500000	7	7	5	5	6	2	4	4	5	5	6	2	4	4	18.3	70.07	628	9	7	6	4	5	5	12.6	12.4	15	5.1	11	9.1	8.32885	7.99807	8.05565	8.35374	7.97821	8.11631	8.44356	8.16926	8.11408	8.01624
5718	Q96QV1;Q96QV1-2	Hedgehog-interacting protein	HHIP	0.744986	0.568152	-0.176833	yes	no	0	40297000000	30	30	28	27	27	25	26	25	28	27	27	25	26	25	51.9	78.851	700	82	78	75	81	79	65	48.9	45.9	46.4	43.6	45.6	42.7	9.84517	9.7118	9.26745	9.84719	9.65983	9.39176	9.9121	9.80044	9.26759	9.72837
6663	Q9UKP4;A8MQ00;E7EP58	A disintegrin and metalloproteinase with thrombospondin motifs 7	ADAMTS7	0.744297	0.185441	-0.558855	yes	no	5.1498e-22	302810000	4	4	3	1	3	3	2	2	3	1	3	3	2	2	6	184.09	1686	5	2	3	3	2	3	4	1.5	4	4.2	3.4	3.4	7.95248	7.74452	7.53283	7.26696	7.06494	6.83742	7.99172	7.7248	7.65367	7.50881
2941	P07738;C9JH23	Bisphosphoglycerate mutase	BPGM	0.735774	0.907874	0.1721	yes	no	6.2306e-56	1351200000	7	7	6	6	7	4	6	5	6	6	7	4	6	5	27.8	30.005	259	8	10	14	8	8	7	27.4	27.4	27.8	15.4	24.7	20.1	8.33832	8.17926	7.82496	8.48386	8.31831	7.98481	8.38979	8.24189	7.85008	8.10941
6478	Q9NZN3;B4DFR5	EH domain-containing protein 3	EHD3	0.735768	-0.432104	-1.16787	yes	no	7.7249e-117	449430000	16	4	14	13	15	13	12	13	4	2	3	3	3	3	38.9	60.886	535	4	2	3	3	3	3	35	30.8	36.6	33.5	30.7	32.9	7.86227	7.56597	7.55646	7.66312	7.38748	7.33512	8.07962	7.82208	7.73022	7.91104
5404	Q8WX93;Q8WX93-5;Q8WX93-3;B3KTG2;Q8WX93-4;Q8WX93-2;B7ZMM5;Q8WX93-7;F8WA26;H0YA05;D6R9F5;Q8WX93-6;H0Y952	Palladin	PALLD	0.733384	0.696634	-0.0367494	yes	no	2.865e-124	1758400000	16	16	9	8	9	10	8	8	9	8	9	10	8	8	13.4	150.56	1383	21	14	16	18	19	14	7.3	7.4	9.4	9	7.3	7.4	8.62682	8.48728	8.06584	8.33654	8.15658	7.86707	8.68179	8.56016	8.06963	8.27882
2060	Q96CG8;G3V141;F8WAA6;Q96CG8-2;E7EVQ5;E5RK99	Collagen triple helix repeat-containing protein 1	CTHRC1	0.731403	0.178535	-0.552869	yes	no	5.5387e-29	484310000	3	3	2	2	3	2	2	2	2	2	3	2	2	2	14.4	26.224	243	4	5	5	5	5	5	8.2	11.1	14.4	11.1	8.2	11.1	7.74865	7.55341	7.30747	7.81531	7.59015	7.42228	8.09527	7.92474	7.60683	7.94771
6547	Q9UBP9;B8ZZ72;E9PB86;Q9UBP9-2	PTB domain-containing engulfment adapter protein 1	GULP1	0.723104	0.579857	-0.143247	yes	no	1.2662e-18	120330000	4	4	2	2	3	1	2	3	2	2	3	1	2	3	12.2	34.49	304	2	2	4	1	2	4	9.2	7.2	10.2	3.9	7.2	10.2	7.17624	7.02621	6.64176	7.0839	6.87238	6.67	7.45192	7.26479	6.99606	6.71203
211	A8MWY0;C9JA41;B4DJV3;A8MWY0-2;B5MDQ3	UPF0577 protein KIAA1324-like	KIAA1324L	0.717853	-0.381173	-1.09903	yes	no	5.049e-48	731220000	7	7	6	4	5	4	4	4	6	4	5	4	4	4	12.2	113.84	1029	15	13	10	9	8	8	10.5	7.5	9.2	7.5	7.5	7.5	8.21611	7.99363	7.81916	8.04403	7.77549	7.70791	8.19932	7.96845	7.81457	8.05633
6482	Q9NZV1	Cysteine-rich motor neuron 1 protein;Processed cysteine-rich motor neuron 1 protein	CRIM1	0.715262	0.0633037	-0.651959	yes	no	1.0531e-32	464000000	7	7	3	3	3	3	2	4	3	3	3	3	2	4	11.8	113.74	1036	3	3	5	3	3	4	4.6	4.3	5.7	5.7	3.4	5.8	7.87094	7.65729	7.46042	7.63269	7.37707	7.28094	7.9085	7.69596	7.4962	7.89356
4560	Q4L180;Q4L180-2;Q4L180-7;Q4L180-3;C9JYJ6;C9JN41;Q4L180-5;Q4L180-6	Filamin A-interacting protein 1-like	FILIP1L	0.713447	1.00909	0.295641	yes	no	2.112e-174	1535500000	10	10	9	8	5	6	5	6	9	8	5	6	5	6	10.5	130.38	1135	19	15	12	11	14	12	9.9	8.5	5.6	8.2	6.3	7.9	8.50934	8.38241	7.91319	8.44091	8.26827	7.95681	8.48374	8.36449	7.86415	8.15348
4492	Q16831;Q86Y75;B4DND0;C9JIP2;C9J486;F8WD51;C9K0J2	Uridine phosphorylase 1	UPP1	0.711515	0.192678	-0.518837	yes	no	9.4211e-21	1040900000	6	6	5	5	4	2	4	2	5	5	4	2	4	2	21.9	33.934	310	10	9	10	8	9	5	18.7	18.1	14.5	7.4	13.9	7.4	8.42999	8.20352	8.03894	8.29019	8.02825	7.94619	8.26437	8.06194	7.83558	8.15241
419	P23219;P23219-2;B4DHQ2	Prostaglandin G/H synthase 1	PTGS1	0.703685	0.610125	-0.0935602	yes	no	8.1851e-73	2605200000	10	10	9	8	10	6	5	8	9	8	10	6	5	8	25.7	68.686	599	16	17	18	11	10	15	24.5	19.4	25.7	14.2	13.9	22.7	8.6134	8.46948	8.06375	8.79154	8.59229	8.35734	8.77827	8.65167	8.18116	8.32152
2712	O94832;F2Z2U7;B0I1T2;B0I1T2-4;B0I1T2-3;B0I1T2-2;F8WEW9	Unconventional myosin-Id	MYO1D	0.698873	-0.399007	-1.09788	yes	no	2.7324e-269	6727000000	29	28	22	22	23	19	22	21	21	21	22	18	21	20	33.5	116.2	1006	44	44	48	33	48	44	26.4	26.9	28.4	24.5	26	24.2	9.06002	8.80428	8.70842	9.06993	8.76178	8.77589	9.10558	8.88318	8.70849	8.78459
3383	P32456;Q5T8M0	Interferon-induced guanylate-binding protein 2	GBP2	0.698678	-0.312317	-1.011	yes	no	4.7575e-138	2731500000	13	9	10	10	10	8	7	9	6	6	6	5	4	5	23.7	67.208	591	18	19	17	16	14	15	18.6	19.8	18.4	16.8	16.8	17.6	8.5669	8.33554	8.18281	8.52669	8.24613	8.20417	8.95923	8.60066	8.70901	8.45286
1356	Q92743;E7ESJ0;H0Y7G9	Serine protease HTRA1	HTRA1	0.697714	-0.00963389	-0.707348	yes	no	7.0583e-38	3369100000	10	10	8	9	9	9	9	9	8	9	9	9	9	9	19	51.286	480	22	28	25	16	21	24	13.5	15.4	15.4	15.4	17.1	15.4	8.64938	8.43914	8.23343	8.94461	8.66293	8.62333	8.77115	8.57051	8.33933	8.48527
5112	Q8IY21;H0Y8Z7;D6R944	Probable ATP-dependent RNA helicase DDX60	DDX60	0.696635	-0.146786	-0.843421	yes	no	6.9202e-38	435860000	8	7	6	5	4	5	6	7	5	4	3	4	5	6	6.7	197.85	1712	7	7	6	7	8	10	5.1	4.4	3.7	3.8	5.5	5.5	7.78954	7.56792	7.39125	7.7637	7.47186	7.45327	7.92095	7.70922	7.50738	7.82357
4950	Q7Z4N8;B4DUD3;Q7Z4N8-2;H0YCC3	Prolyl 4-hydroxylase subunit alpha-3	P4HA3	0.691873	1.82123	1.12936	yes	no	3.4518e-07	449520000	2	2	2	2	2	2	2	2	2	2	2	2	2	2	3.1	61.126	544	5	6	8	4	3	6	3.1	3.1	3.1	3.1	3.1	3.1	7.71639	7.656	6.82973	7.8136	7.73547	7.03015	8.0535	7.99697	7.13994	7.60389
1267	G3XAH0;Q99719;E7ENS5;B4DJ62;C9JM82;Q96MY5;E7EX32;E7EPG2;E7EQM7;H0Y661;F8W9E5	Septin-5	2005-09-01	0.690087	0.301621	-0.388465	yes	no	6.3777e-37	491290000	5	4	3	5	2	3	4	3	3	4	2	3	4	3	20.1	43.845	378	5	7	5	7	7	7	10.8	20.1	5.8	10.8	15.9	10.8	7.91359	7.73672	7.43804	7.82248	7.58545	7.44637	7.75552	7.60571	7.2205	7.8445
1017	C9JRI6;P55290;F5H6D5;A8W477;A8W476	Cadherin-13	CDH13	0.689222	-0.448478	-1.1377	yes	no	1.9833e-29	1223400000	5	5	3	5	4	5	4	4	3	5	4	5	4	4	10.4	78.301	713	4	7	6	6	4	7	8.1	10.4	9.4	10.4	9.4	5.9	8.36968	8.11677	8.01452	8.38723	8.12356	8.04532	8.48554	8.20833	8.1593	7.97664
3893	P62745	Rho-related GTP-binding protein RhoB	RHOB	0.682653	0.36188	-0.320773	yes	no	9.4419e-62	1718900000	5	3	4	5	5	4	5	3	3	3	3	2	3	2	32.1	22.123	196	8	6	9	6	6	6	27.6	32.1	32.1	26.5	32.1	21.9	8.51891	8.35953	8.00629	8.34764	8.13046	7.94264	8.62381	8.46079	8.11926	8.45856
5990	Q9BZ29-4;E9PCD6;A8MWZ5;Q9BZ29;Q9BZ29-3;F5GZE8;F5H1Q4;H0Y3S1;Q5JUD8;Q5JUD3;REV__Q9BPX3;REV__H0Y9Z8	Dedicator of cytokinesis protein 9	DOCK9	0.672109	-0.323774	-0.995883	yes	no	0	485810000	51	2	32	42	35	35	42	38	1	1	1	2	1	1	32.4	238.84	2093	4	4	2	4	4	4	20	25.6	20.4	23.3	27	24.2	7.85568	7.62279	7.47379	7.82697	7.51922	7.53255	7.78723	7.57274	7.37798	8.00217
1636	O00212;E9PMC8	Rho-related GTP-binding protein RhoD	RHOD	0.667655	-0.242206	-0.909861	yes	no	7.0085e-09	91747000	1	1	1	1	1	1	1	1	1	1	1	1	1	1	9	23.413	210	3	2	2	4	2	1	9	9	9	9	9	9	7.0389	6.79455	6.67263	7.10106	6.80505	6.79498	7.41337	7.20172	6.99967	7.32545
4895	Q70Z35;Q70Z35-2;F8WD63;Q70Z35-3	Phosphatidylinositol 3,4,5-trisphosphate-dependent Rac exchanger 2 protein	PREX2	0.6661	0.316169	-0.349931	yes	no	9.1075e-124	2279300000	14	14	13	14	14	10	12	12	13	14	14	10	12	12	11.8	182.62	1606	28	36	28	24	30	35	11.8	11.8	11.8	9.3	9.8	10.3	8.58755	8.41838	8.09625	8.54122	8.32467	8.1352	8.64249	8.4836	8.12879	8.57816
2961	P08493	Matrix Gla protein	MGP	0.654007	2.20663	1.55262	yes	no	5.8633e-37	2281600000	4	4	4	3	4	3	3	3	4	3	4	3	3	3	38.8	12.353	103	7	6	7	6	4	6	38.8	32	38.8	32	32	32	8.59872	8.54757	7.64451	8.57787	8.51001	7.73822	8.7252	8.67715	7.74533	8.3273
3382	P32455;F5H2M9	Interferon-induced guanylate-binding protein 1	GBP1	0.653981	0.143931	-0.51005	yes	no	3.9227e-119	752210000	12	6	9	7	9	6	5	5	4	2	3	2	1	1	24	67.93	592	11	9	9	8	7	8	18.6	13.2	15.4	16.2	12	9.8	8.05538	7.85591	7.6215	8.07929	7.82688	7.72349	8.26364	8.09107	7.77934	7.87091
5623	Q96HC4;Q96HC4-4;E9PBF5;D6RB78;F5H7Y0;H0Y8Y3;D3YTJ1;Q96HC4-2;F5H0X8;Q96HC4-3;H0YBI4;H0Y929	PDZ and LIM domain protein 5	PDLIM5	0.651919	-0.112767	-0.764686	yes	no	2.9662e-212	32353000000	29	29	25	18	22	22	20	20	25	18	22	22	20	20	49.5	63.944	596	73	71	68	67	66	71	41.4	38.3	44	43	35.9	37.8	9.69607	9.49813	9.25959	9.85444	9.58432	9.52013	9.74551	9.54135	9.31961	9.66344
5740	Q96S86	Hyaluronan and proteoglycan link protein 3	HAPLN3	0.640011	2.22837	1.58836	yes	no	0.00081678	366240000	1	1	1	1	1	1	1	1	1	1	1	1	1	1	2.5	40.894	360	4	3	3	2	3	2	2.5	2.5	2.5	2.5	2.5	2.5	7.91788	7.8769	6.87235	7.90747	7.84076	7.06096	7.86348	7.82814	6.75645	7.4931
2331	O00622;B4DI61;F8W9U7	Protein CYR61	CYR61	0.634235	0.901176	0.266941	yes	no	2.5029e-167	46980000000	24	24	19	21	23	19	21	19	19	21	23	19	21	19	70.6	42.026	381	65	68	72	61	61	56	57	65.9	70.3	57	62.7	60.1	9.90723	9.7986	9.25222	9.91262	9.76034	9.38356	9.95692	9.86521	9.23649	9.82423
4153	Q12965;H0YNQ8;H0YLJ4;H0YLE5;H0YN00	Unconventional myosin-Ie	MYO1E	0.629668	-0.373286	-1.00296	yes	no	3.509e-169	7095200000	31	29	26	25	27	18	23	23	24	23	25	17	21	21	34.1	127.06	1108	50	49	50	34	45	48	28.4	29	30.6	20.6	25.8	26.5	9.04493	8.80689	8.67026	9.01355	8.69247	8.73169	9.14376	8.92361	8.7433	9.00966
1060	Q9NP61;E9PB03;C9JZR4;F5GYF6;B0QYV8	ADP-ribosylation factor GTPase-activating protein 3	ARFGAP3	0.624896	-0.480989	-1.10589	yes	no	8.8193e-40	517190000	8	3	6	6	4	6	8	5	3	2	2	2	3	1	20.3	56.928	516	4	2	2	3	3	1	15.9	14	11.6	15.3	20.3	10.9	7.92011	7.63446	7.60314	7.6698	7.28296	7.44039	8.06311	7.80793	7.71085	8.18693
3326	P29279;P29279-2	Connective tissue growth factor	CTGF	0.620982	1.9804	1.35942	yes	no	1.1628e-244	23119000000	21	21	19	18	19	17	17	17	19	18	19	17	17	17	62.8	38.091	349	46	47	52	41	36	37	62.8	54.4	60.5	57	60.7	53.3	9.6215	9.56955	8.67358	9.59208	9.51865	8.78399	9.66588	9.61658	8.69649	9.57271
6264	Q9NQC3-5			0.612016	0.578693	-0.033323	yes	no	5.3503e-135	327770000	11	1	9	9	11	10	9	9	1	1	1	1	1	1	46.4	42.274	392	3	3	3	1	3	2	33.2	33.2	46.4	40.3	33.2	33.2	7.7994	7.41052	7.57141	7.16803	6.99604	6.68261	7.55991	7.39014	7.06985	8.02481
1505	E9PDJ9;Q9UPQ0-6;Q9UPQ0-9;G5EA03;Q9UPQ0-3;H0Y2S5;Q9UPQ0;Q9UPQ0-4;Q9UPQ0-2;E9PHM7;H0Y8P3;Q9UPQ0-5;E7EPK0;Q9UPQ0-8;F5GY62;D6RD46	LIM and calponin homology domains-containing protein 1	LIMCH1	0.610507	0.0706787	-0.539829	yes	no	1.0462e-10	165830000	4	4	3	3	3	3	4	4	3	3	3	3	4	4	4.4	103.52	916	8	7	7	6	7	9	3.3	3.6	3.3	3.3	4.4	4.4	7.45632	7.29929	6.93837	7.46733	7.18738	7.14414	7.46657	7.28126	7.00728	7.31879
593	Q13433;Q13433-2;B4DWH6	Zinc transporter ZIP6	SLC39A6	0.607143	0.869491	0.262348	yes	no	4.1225e-42	275120000	2	2	2	1	1	1	1	2	2	1	1	1	1	2	4.6	85.046	755	5	3	4	4	4	6	4.6	3	3	3	3	4.6	7.57624	7.44602	6.98962	7.28434	7.07802	6.86201	7.78758	7.65694	7.20219	7.80229
5226	Q8NBJ5;E9PC06	Procollagen galactosyltransferase 1	GLT25D1	0.606818	0.576411	-0.0304066	yes	no	1.1169e-203	17121000000	28	28	20	22	21	18	17	20	20	22	21	18	17	20	46.1	71.635	622	53	55	56	48	48	49	31.2	37.5	35	26.8	27	33.8	9.47959	9.33881	8.92184	9.45222	9.2686	8.98973	9.49067	9.35067	8.93088	9.30563
1868	Q5VT25-6;Q5VT25-2;Q5VT25;Q5VT25-5;F5H5N0;Q5VT25-4;Q5VT25-3;H0Y5V1;E9PEF7;H0Y7V8;H0Y6V3;H0Y6R0	Serine/threonine-protein kinase MRCK alpha	CDC42BPA	0.605471	0.00339421	-0.602077	yes	no	1.6964e-128	2444200000	25	21	15	18	17	14	18	16	12	15	13	11	15	13	17.6	202.81	1781	24	28	26	22	26	28	12.1	13.2	12.4	10.2	14.5	11.1	8.48732	8.26278	8.09339	8.58848	8.25132	8.32081	8.71558	8.51497	8.28369	8.49852
3568	P48307	Tissue factor pathway inhibitor 2	TFPI2	0.603985	2.44152	1.83753	yes	no	2.0803e-73	3601900000	8	8	7	7	8	3	5	4	7	7	8	3	5	4	35.3	26.934	235	12	8	12	5	6	7	34.9	26.8	35.3	16.2	26.4	20.4	8.98845	8.94708	7.94684	8.83476	8.77467	7.9461	8.93419	8.90259	7.78027	8.3312
291	B1AP13;P08174-2;Q14UF6;Q14UF4;P08174;E9PSH2;Q14UF5;B1AP15;F5H2H0	Complement decay-accelerating factor	CD55;DAF	0.602968	-0.428357	-1.03133	yes	no	1.1415e-66	3089000000	7	7	6	6	6	6	7	5	6	6	6	6	7	5	24.1	49.338	444	11	12	8	10	10	8	22.7	22.7	22.7	22.7	24.1	16.2	8.69852	8.44946	8.33844	8.85016	8.54856	8.5497	8.73973	8.47789	8.39564	8.60698
722	O15075;O15075-2;B7Z2T7;Q5VZY9	Serine/threonine-protein kinase DCLK1	DCLK1;DCAMKL1	0.602393	0.319064	-0.283329	yes	no	1.1902e-11	90254000	2	2	1	1	1	1	1	2	1	1	1	1	1	2	3.4	82.223	740	2	2	2	3	4	3	1.6	1.6	1.6	1.6	1.6	3.4	7.32621	7.15342	6.84244	6.75758	6.58936	6.2643	7.45703	7.22435	7.07485	6.9473
119	Q5T5P2;E9PHU3;Q5T5P2-3;C9JRK3;A6NLF3;Q5T5P2-7;Q5T5P2-2;Q5T5P1;Q5T5P2-6;Q5T5P2-8;Q5T5P2-4;Q5T5P0;F5H1Q3	Sickle tail protein homolog	SKT;KIAA1217	0.599253	0.84112	0.241867	yes	no	5.0948e-21	487960000	3	3	3	3	3	3	3	3	3	3	3	3	3	3	1.8	214.11	1943	12	11	10	11	9	8	1.8	1.8	1.8	1.8	1.8	1.8	8.07493	7.95152	7.4682	7.91344	7.75342	7.40228	7.92246	7.79969	7.3138	7.75436
642	Q16270;B4E1N2	Insulin-like growth factor-binding protein 7	IGFBP7	0.597931	0.137346	-0.460585	yes	no	4.5701e-78	1516900000	7	7	5	5	6	4	5	6	5	5	6	4	5	6	31.2	29.13	282	7	8	8	6	9	6	24.5	24.5	29.4	18.8	24.5	30.9	8.48893	8.31414	8.0092	8.5227	8.29767	8.1295	8.38872	8.19173	7.95059	8.0983
411	Q9ULH0;Q9ULH0-4;Q9ULH0-2;E9PH70;H0Y8E4;B4DGY1;Q9ULH0-3;Q9ULH0-5	Kinase D-interacting substrate of 220 kDa	KIDINS220	0.597533	-0.0877344	-0.685267	yes	no	9.5849e-16	275960000	3	3	3	3	3	2	3	3	3	3	3	2	3	3	1.9	196.54	1771	8	9	5	5	10	7	1.9	1.9	1.9	1.4	1.9	1.9	7.61404	7.40123	7.20219	7.59462	7.2959	7.29128	7.74955	7.54108	7.33074	7.37157
4193	Q13228;B4E1F3;Q13228-2;A6PVW9;H0Y532;A6PVX1;F8WCR4;F2Z2W8;C9JVL0	Selenium-binding protein 1	SELENBP1	0.596026	-0.628447	-1.22447	yes	no	1.0935e-39	982280000	6	6	4	4	3	3	5	4	4	4	3	3	5	4	20.3	52.39	472	6	6	6	6	7	6	13.1	13.1	11.2	11	15.5	16.1	8.16343	7.88305	7.84075	8.26012	7.89579	8.01431	8.20575	7.90322	7.90623	8.19471
6126	Q9H4X1;Q9H4X1-2	Regulator of cell cycle RGCC	RGCC	0.595948	-1.14183	-1.73777	yes	no	1.961e-09	977150000	2	2	2	2	2	2	2	2	2	2	2	2	2	2	15.3	14.559	137	7	9	7	7	9	8	15.3	15.3	15.3	15.3	15.3	15.3	8.34325	7.97934	8.09715	8.23256	7.79809	8.03346	8.05808	7.67749	7.82425	8.0613
907	C9J4I9		PXDN	0.594552	0.665912	0.0713606	yes	no	6.7927e-54	332180000	7	1	6	6	5	6	6	3	1	1	1	1	1	1	48.7	25.57	224	3	3	3	4	3	3	45.5	38.8	35.7	38.8	38.8	21.4	7.75141	7.6256	7.15195	7.44898	7.28021	6.95685	7.84044	7.71558	7.23817	7.83213
6767	Q9Y223-2;Q9Y223;H0YFA7;Q9Y223-3;A7UNU7;F5H499	Bifunctional UDP-N-acetylglucosamine 2-epimerase/N-acetylmannosamine kinase;UDP-N-acetylglucosamine 2-epimerase;N-acetylmannosamine kinase	GNE	0.586944	0.0477112	-0.539233	yes	no	8.9621e-38	228830000	6	6	4	3	2	3	4	2	4	3	2	3	4	2	13.1	83.065	753	4	4	2	5	4	2	7.8	6.4	5.2	7.2	7.6	6.1	7.60094	7.36739	7.21998	7.32689	7.04477	7.00612	7.18963	6.98355	6.76693	7.6208
5010	Q8NBS9;Q86UY0;B2RDM2	Thioredoxin domain-containing protein 5	TXNDC5	0.58599	0.750276	0.164286	yes	no	1.0098e-296	221380000000	23	23	21	23	22	22	21	22	21	23	22	22	21	22	49.5	47.628	432	210	213	216	196	195	193	47.2	49.5	47.2	47.2	47.2	47.2	10.5341	10.409	9.93235	10.6226	10.4559	10.126	10.6188	10.4886	10.0321	10.4264
3200	P20908	Collagen alpha-1(V) chain	COL5A1	0.584826	0.182213	-0.402613	yes	no	2.2622e-93	1993300000	6	4	6	5	6	5	5	5	4	3	4	3	3	3	6.4	183.56	1838	12	11	14	12	12	7	6.4	4.8	6.4	4.8	4.8	4.8	8.46328	8.27014	8.01837	8.55884	8.34272	8.15214	8.72632	8.55302	8.24353	8.41958
221	Q53S48;A8MXJ1;B5MCF5;Q9Y6Q2;Q9UNN4;Q9UNN4-2;F8WA59;P52655-2	Stonin-1	ALF;STON1-GTF2A1L;STON1	0.581608	-0.432104	-1.01371	yes	no	2.1118e-24	653780000	6	5	5	5	5	5	3	5	4	5	4	5	3	5	3.6	132.08	1182	15	11	8	11	12	15	2.6	3	3.6	3	2	3	8.00898	7.73213	7.68237	8.256	7.88849	8.01263	8.11654	7.89879	7.71236	7.86757
3797	P58335;P58335-4;P58335-2;P58335-3;Q9H6X2	Anthrax toxin receptor 2	ANTXR2	0.581294	0.518205	-0.0630888	yes	no	9.1086e-44	318890000	4	4	2	2	3	2	3	2	2	2	3	2	3	2	11.5	53.666	489	3	4	4	4	4	3	6.7	6.7	9.2	6.7	9	6.7	7.9394	7.78837	7.40734	7.45719	7.21767	7.0845	7.65737	7.51227	7.11072	7.59888
1751	Q08431;F5H7N9;F5GZN3;Q08431-3;Q08431-2;H0YKS8;H0YMK7	Lactadherin;Lactadherin short form;Medin	MFGE8	0.576412	-0.724825	-1.30124	yes	no	3.6672e-27	1074000000	6	6	5	6	4	3	4	4	5	6	4	3	4	4	21.4	43.122	387	10	10	6	7	8	7	17.6	21.4	15.5	11.6	15	14.2	8.23447	7.93309	7.93378	8.52002	8.20126	8.23606	8.09985	7.77732	7.81932	7.9999
4536	Q9NQ30;Q3V4E3	Endothelial cell-specific molecule 1	ESM1	0.570084	-0.105946	-0.676031	yes	no	8.7134e-09	106330000	1	1	1	1	1	1	1	1	1	1	1	1	1	1	9.8	20.095	184	3	3	3	2	2	1	9.8	9.8	9.8	9.8	9.8	9.8	7.31783	7.08171	6.94047	7.25008	6.98693	6.90756	7.60589	7.37315	7.22376	6.9778
6832	Q9Y366	Intraflagellar transport protein 52 homolog	IFT52	0.568313	0.586095	0.0177822	yes	no	2.4556e-22	163310000	2	2	1	1	0	2	2	1	1	1	0	2	2	1	8.2	49.706	437	3	2	0	2	3	2	5	5	0	8.2	8.2	5	7.66792	7.53172	7.09799	7.37661	7.18969	6.9204	NaN	NaN	NaN	7.45712
6541	Q9UBG0	C-type mannose receptor 2	MRC2	0.563319	0.126518	-0.436802	yes	no	3.6704e-92	1247200000	8	8	8	6	7	7	7	5	8	6	7	7	7	5	9.4	166.67	1479	18	15	18	15	17	12	9.4	7.2	8.5	8.5	8.5	5.8	8.29881	8.10985	7.84633	8.24724	8.01397	7.86588	8.58396	8.40005	8.12208	8.11277
3266	P24844;Q9BUF9	Myosin regulatory light polypeptide 9	MYL9	0.562827	0.891081	0.328254	yes	no	1.3692e-186	1802000000	12	4	10	12	10	10	9	10	3	4	3	3	3	3	66.3	19.827	172	7	7	8	7	5	7	60.5	66.3	60.5	60.5	60.5	60.5	8.50682	8.40192	7.8384	8.31731	8.19201	7.71628	8.72931	8.61068	8.10775	8.38162
2532	O60234	Glia maturation factor gamma	GMFG	0.561732	-0.928427	-1.49016	yes	no	2.4849e-22	1722500000	6	4	4	6	5	3	4	5	3	4	3	2	2	3	57	16.801	142	8	9	7	8	6	7	25.4	57	44.4	20.4	39.4	44.4	8.49952	8.20022	8.19676	8.31296	7.92827	8.08207	8.48259	8.14063	8.21898	8.5629
6425	Q9NXD2;A6NGL9;Q9NXD2-2;Q9NXD2-3	Myotubularin-related protein 10	MTMR10	0.559619	0.0716183	-0.488001	yes	no	4.4067e-49	2381400000	11	8	7	8	6	8	6	7	6	6	5	7	6	6	21.2	88.272	777	12	11	9	13	11	11	14	15.2	16.7	15.2	12.2	13.8	8.64844	8.47208	8.17184	8.34974	8.07335	8.02259	8.762	8.56527	8.3234	8.73677
3706	P52799;B5MEE4	Ephrin-B2	EFNB2	0.556372	-0.730923	-1.2873	yes	no	1.5139e-27	372560000	3	3	3	3	3	3	3	3	3	3	3	3	3	3	14.1	36.923	333	7	9	6	6	7	8	14.1	14.1	14.1	14.1	14.1	14.1	7.67719	7.40002	7.35089	7.71426	7.36478	7.45681	7.73168	7.45585	7.40388	7.62031
1677	G8JLL9;Q7Z406-2;F2Z2U8;Q7Z406-6;Q7Z406;F2Z2U9;Q7Z406-4;F2Z2S7;Q7Z406-5	Myosin-14	MYH14	0.55353	0.332953	-0.220578	yes	no	2.6476e-116	2452900000	16	3	15	15	11	13	12	13	2	3	2	2	2	2	7	232.04	2036	10	14	10	7	10	10	6.4	6.5	5.1	5.7	5.6	5.7	8.53739	8.38801	8.00134	8.67908	8.49966	8.20855	8.68072	8.52523	8.15924	8.50659
2240	Q9NQ66;Q9NQ66-2;H0YGI7;H0YCJ2;E9PEL1;Q8IV92	1-phosphatidylinositol 4,5-bisphosphate phosphodiesterase beta-1	PLCB1	0.552482	-0.420725	-0.973207	yes	no	1.577e-31	202190000	6	6	2	4	5	2	3	4	2	4	5	2	3	4	8	138.57	1216	5	4	6	2	4	4	2.1	4.7	7.2	3.2	3.9	6.4	7.14236	6.87026	6.81035	7.46848	7.12542	7.20577	7.94164	7.69338	7.58053	7.1944
2543	O60343;O60343-3;O60343-2;O60343-5;O60343-4;Q5JU47;H0Y8P0;A0JNU9	TBC1 domain family member 4	TBC1D4	0.552354	-0.629193	-1.18155	yes	no	2.1678e-242	4094200000	22	20	15	16	19	15	16	18	13	14	17	14	14	16	19.6	146.56	1298	21	25	26	25	22	27	13.6	13.7	16.9	14.6	14.2	15.6	8.71579	8.45054	8.37577	8.74578	8.39583	8.48872	8.96933	8.73149	8.59433	8.87074
3270	P25116	Proteinase-activated receptor 1	F2R	0.551523	-0.10977	-0.661294	yes	no	6.4213e-14	466680000	3	3	2	2	1	3	2	3	2	2	1	3	2	3	10.1	47.44	425	2	3	1	4	3	3	4.5	4.5	2.4	10.1	4.5	10.1	7.81048	7.6258	7.35007	7.9027	7.62899	7.57251	7.79386	7.57931	7.38473	8.02371
3416	P35555;F5H2N7;F8W7L2;H0YND0;F6U495;E9PHW4	Fibrillin-1	FBN1	0.54959	0.136537	-0.413052	yes	no	1.3124e-139	1941000000	16	15	13	9	12	9	10	7	12	8	11	8	10	7	9.4	312.24	2871	25	24	24	24	21	20	8.3	5.5	6.9	4.8	5.3	4.7	8.39345	8.20588	7.93846	8.5136	8.00117	8.35415	8.8214	8.35957	8.63745	8.29877
2187	Q8TCZ2-5;Q8TCZ2;H0Y4H3;B6ZDL4;Q8TCZ2-2;Q8TCZ2-3;E9PD27	CD99 antigen-like protein 2	CD99L2	0.543903	0.108488	-0.435415	yes	no	5.0209e-12	197400000	2	2	2	2	1	2	1	1	2	2	1	2	1	1	8.1	28.906	272	7	4	4	3	2	2	8.1	8.1	5.5	8.1	5.5	5.5	7.81447	7.58031	7.43436	7.43006	7.2205	7.01301	7.58767	7.38319	7.1623	7.30634
2952	P07996;A8MZG1;P35442;H0Y3J3;P49746;B4DQ20;Q2HIZ1;F5H4Z8	Thrombospondin-1	THBS1	0.542694	1.23501	0.692315	yes	no	0	80311000000	69	25	64	64	64	60	59	57	22	21	23	21	19	18	63.7	129.38	1170	91	85	96	72	69	75	62.2	63.5	61.1	61.1	61	58.5	10.2235	10.1385	9.47309	10.0521	9.93754	9.41727	10.2388	10.1538	9.48864	10.1082
6960	Q9Y6K8;Q9Y6K8-3;Q9Y6K8-2;E9PQQ8	Adenylate kinase isoenzyme 5	AK5	0.54133	-0.107688	-0.649018	yes	no	4.5216e-27	173950000	3	2	2	3	3	2	3	3	1	2	2	1	2	2	7.8	63.332	562	3	2	5	4	5	4	5.5	7.8	7.8	5.5	7.8	7.8	7.43024	7.22118	7.01237	6.81781	6.56055	6.4681	7.64299	7.41911	7.2481	7.47682
1314	Q92844;E7EQA9;E7EW82;E7EVA2;E7ENY2;E7EMT6;E7EV32;E7ERM9;E7EM55;Q7Z4J6;Q92844-2;E7EWR8	TRAF family member-associated NF-kappa-B activator	TANK	0.540949	0.336683	-0.204266	yes	no	1.3033e-32	916020000	5	5	4	3	3	2	5	4	4	3	3	2	5	4	13.2	47.815	425	10	9	8	10	11	11	11.5	11.5	11.5	5.4	13.2	11.5	7.94584	7.79851	7.40475	8.07339	7.86481	7.65472	8.15912	7.96906	7.70863	8.28031
2735	O95084;B4E2J3;E9PRR2	Serine protease 23	PRSS23	0.540245	1.94497	1.40473	yes	no	9.2118e-81	7080500000	10	10	7	7	9	6	8	8	7	7	9	6	8	8	43.6	43.001	383	15	18	20	15	15	17	33.7	29.8	38.9	28.2	34.5	33.2	9.02739	8.96802	8.13389	9.10944	9.02657	8.34914	9.2267	9.16749	8.33193	8.97431
2813	O95858	Tetraspanin-15	TSPAN15	0.539267	-0.691981	-1.23125	yes	no	1.0391e-22	1280200000	5	5	3	4	4	3	4	3	3	4	4	3	4	3	19	33.165	294	6	6	7	3	6	4	8.5	11.2	16.3	8.5	16.3	8.5	8.36575	8.0924	8.03519	8.44571	7.99528	8.25563	8.41323	8.13287	8.0905	8.23325
6765	Q9Y219;Q9Y219-2	Protein jagged-2	JAG2	0.539182	-0.321582	-0.860764	yes	no	4.9999e-26	455820000	3	3	1	2	2	1	2	1	1	2	2	1	2	1	4.2	133.37	1238	3	5	5	4	4	3	1.2	3	3	1.2	2.4	1.2	7.74711	7.52237	7.35347	7.9599	7.63648	7.68016	8.0387	7.82844	7.62276	7.67349
2324	O00534	von Willebrand factor A domain-containing protein 5A	VWA5A	0.537103	0.107928	-0.429175	yes	no	5.8461e-06	124170000	1	1	1	1	1	1	1	1	1	1	1	1	1	1	2	86.488	786	2	2	2	1	2	2	2	2	2	2	2	2	7.37273	7.20262	6.88339	7.24117	6.91857	6.96068	7.33449	7.18193	6.80612	6.85022
1635	Q16798;E9PMB9;B7Z6V0;Q6TCH8;Q8NAS5;E9PNN2	NADP-dependent malic enzyme, mitochondrial;Malic enzyme	ME3	0.533968	-0.514198	-1.04817	yes	no	7.388e-54	434950000	3	3	2	2	2	3	2	3	2	2	2	3	2	3	9.9	67.068	604	4	3	2	7	5	4	7.3	7.3	7.3	9.9	7.3	9.9	7.7537	7.45182	7.45352	7.60875	7.22794	7.37511	7.69837	7.38407	7.4102	8.22074
6503	Q9P0V3;C9J137;Q9P0V3-2;B4E2S1	SH3 domain-binding protein 4	SH3BP4	0.53169	-0.0805212	-0.612211	yes	no	4.8763e-54	1011300000	10	10	6	6	5	4	6	5	6	6	5	4	6	5	13.5	107.49	963	7	8	7	7	12	7	9.3	9.4	8.4	7.3	9.2	7.9	8.13599	7.85804	7.81062	8.33508	8.03535	8.03274	8.11511	7.9109	7.6893	8.18667
3202	P21266	Glutathione S-transferase Mu 3	GSTM3	0.529016	-2.41151	-2.94052	yes	no	2.618e-86	2736300000	12	10	10	12	9	11	11	9	8	10	8	9	10	9	47.1	26.559	225	29	29	25	28	28	29	40.9	47.1	37.8	47.1	44	33.8	8.60185	8.01038	8.47333	8.72059	8.04159	8.61854	8.6293	8.05477	8.49478	8.60973
4684	Q5T5Y3-3;Q5T5Y3;Q5T5Y3-2	Calmodulin-regulated spectrin-associated protein 1	CAMSAP1	0.528917	0.34077	-0.188148	yes	no	8.2893e-15	566430000	3	3	3	3	3	3	3	3	3	3	3	3	3	3	2.2	179.34	1613	9	9	6	11	8	8	2.2	2.2	2.2	2.2	2.2	2.2	8.01064	7.84549	7.51075	7.87601	7.63387	7.50683	7.97237	7.80636	7.47436	8.04076
972	C9JHY2;Q7Z3B3;E9PCT4	KAT8 regulatory NSL complex subunit 1	KANSL1;KIAA1267	0.528137	0.381273	-0.146864	yes	no	1.3939e-18	108060000	2	2	1	2	2	2	2	1	1	2	2	2	2	1	3.9	120.96	1105	2	2	3	2	2	1	2.6	3.9	3.9	3.9	3.9	1.3	6.98106	6.71542	6.6415	6.91215	6.71546	6.4735	7.64597	7.49371	7.11687	7.22024
5069	Q8IVG5;Q8IVG5-2	Sterile alpha motif domain-containing protein 9-like	SAMD9L	0.527757	-0.370722	-0.898479	yes	no	4.6623e-53	392210000	9	9	7	6	5	5	6	5	7	6	5	5	6	5	6.4	184.53	1584	11	13	9	8	10	9	6	5.2	4.3	4.3	5.3	4.3	7.81678	7.55934	7.46728	7.69522	7.38092	7.40708	7.9539	7.73991	7.54392	7.73509
5008	Q86UU1;Q86UU1-2;Q86UU1-3;B0YJ65;E9PMZ5;E9PKC1;F5GZP1;F5H406;Q96C94;H0YCP1	Pleckstrin homology-like domain family B member 1	PHLDB1	0.526115	0.0112099	-0.514905	yes	no	1.1334e-110	1902300000	16	16	9	8	9	9	9	10	9	8	9	9	9	10	16.1	151.16	1377	25	20	24	23	22	18	9.8	9.6	10.2	10.3	8.9	10.1	8.5079	8.32255	8.04867	8.3881	8.12717	8.04293	8.62861	8.44103	8.17359	8.51954
5791	Q99643;Q99643-3;Q99643-5	Succinate dehydrogenase cytochrome b560 subunit, mitochondrial	SDHC	0.525846	-0.943884	-1.46973	yes	no	5.8007e-09	4139600000	2	2	2	2	2	2	2	2	2	2	2	2	2	2	12.4	18.61	169	6	5	5	3	6	7	12.4	12.4	12.4	12.4	12.4	12.4	8.73765	8.10568	8.62223	8.79763	8.15694	8.68485	8.71606	8.07748	8.60265	8.46217
3650	P50749	Ras association domain-containing protein 2	RASSF2	0.525757	-0.208205	-0.733962	yes	no	3.5165e-15	55444000	2	2	1	2	1	1	1	1	1	2	1	1	1	1	6.4	37.79	326	1	3	2	2	2	2	5.8	6.4	5.8	5.8	5.8	5.8	6.46916	6.27	6.03475	6.82433	6.52944	6.51706	7.22575	6.971	6.8729	7.02107
6521	Q9P2E3;Q5JXR6;Q5JXR5;E7ESE4;Q9P2E3-2;Q5JXR7	NFX1-type zinc finger-containing protein 1	ZNFX1	0.525092	0.839932	0.31484	yes	no	3.3266e-61	710230000	8	8	3	3	4	3	5	7	3	3	4	3	5	7	6.1	220.22	1918	5	7	7	9	9	11	2.5	2.5	3.4	2.2	3.8	5.2	7.96157	7.8446	7.33467	7.8331	7.65552	7.35894	8.07155	7.94429	7.47641	8.1259
4580	Q53GG5-2;Q53GG5;D6RAF1	PDZ and LIM domain protein 3	PDLIM3	0.524391	-0.404794	-0.929185	yes	no	9.8668e-88	69522000	6	1	5	4	4	5	4	3	1	1	1	1	1	1	32.3	34.279	316	2	3	2	2	2	2	29.4	20.6	24.7	27.5	24.7	12.7	7.12192	6.84125	6.79953	6.84696	6.52858	6.5626	7.27224	7.00928	6.92948	6.93168
1873	Q14642;Q5T1B5;F5H5Z6;F5GWM1;H0Y2W5;E9PBY1;Q5T1B4;F5H3N8;Q5T1B3	Type I inositol 1,4,5-trisphosphate 5-phosphatase	INPP5A	0.523338	-0.331935	-0.855272	yes	no	4.0225e-56	414740000	5	5	4	4	4	3	4	5	4	4	4	3	4	5	17.2	47.819	412	6	7	7	6	9	10	14.6	12.9	14.6	9.2	14.6	17.2	7.62938	7.36996	7.28233	7.85314	7.5436	7.56046	7.90485	7.67601	7.51721	7.64788
567	P22004;H0YFR7;B4DUF7	Bone morphogenetic protein 6	BMP6	0.522867	0.568031	0.0451636	yes	no	9.8887e-08	71241000	1	1	1	1	1	1	1	1	1	1	1	1	1	1	2.5	57.225	513	2	1	2	2	3	2	2.5	2.5	2.5	2.5	2.5	2.5	7.19951	7.0613	6.63499	6.97947	6.72816	6.62227	7.20537	7.07983	6.60516	6.98011
5447	Q92626;Q92626-2	Peroxidasin homolog	PXDN	0.521015	0.404783	-0.116232	yes	no	1.0125e-267	9572700000	29	23	24	25	23	25	23	20	19	20	19	20	18	18	29.1	165.27	1479	35	37	35	36	37	38	25.3	25.4	23.9	24.2	22.2	20	9.18395	9.02518	8.66994	9.22799	9.0306	8.79052	9.18608	9.03189	8.66157	9.15165
4983	Q86SR1;Q86SR1-2;Q86SR1-3;F2Z2M7	Polypeptide N-acetylgalactosaminyltransferase 10	GALNT10	0.515558	0.536147	0.0205892	yes	no	2.5856e-11	1302000000	3	3	2	3	2	2	3	2	2	3	2	2	3	2	5.1	68.991	603	8	11	7	8	10	7	2.5	5.1	2.5	2.5	5.1	2.5	8.25234	8.12205	7.666	8.50195	8.35003	7.97204	8.30201	8.18755	7.66683	8.36374
699	E9PEG8;E7ETS0;E7EN22;B5MEG5;E7EST9;O94966;O94966-3;O94966-4;E7ESU0	Ubiquitin carboxyl-terminal hydrolase;Ubiquitin carboxyl-terminal hydrolase 19	USP19	0.514163	-0.0762895	-0.590452	yes	no	1.0933e-27	133980000	3	3	2	0	3	1	2	2	2	0	3	1	2	2	4.3	156.03	1419	2	0	4	1	2	4	2.9	0	4.3	1.9	2.4	2.9	7.05637	6.817	6.68342	NaN	NaN	NaN	7.69124	7.52095	7.20224	7.10209
1321	Q96RT7;Q96RT7-3;Q96RT7-2;E7EQL8	Gamma-tubulin complex component 6	TUBGCP6	0.509989	-0.290424	-0.800413	yes	no	3.1309e-25	1577000000	5	5	3	3	3	4	4	4	3	3	3	4	4	4	3.4	200.5	1819	6	6	6	6	8	5	1.8	1.8	1.8	2.5	2.7	2.5	8.55989	8.37588	8.09816	8.34187	8.12172	7.94136	8.27147	8.04941	7.87388	8.40087
1334	Q9H1H9;E7ER65;E9PDX3;Q9H1H9-2;Q9H1H9-4;Q9H1H9-3;H0Y307;H0Y9Z7;H0Y925	Kinesin-like protein KIF13A	KIF13A	0.507927	0.0694216	-0.438506	yes	no	1.5451e-29	134380000	8	5	5	5	4	5	4	5	2	2	1	2	1	2	6.3	202.31	1805	4	4	3	6	4	3	4	3.1	2.4	3.3	2.4	3.1	7.59951	7.37499	7.20556	6.88904	6.58301	6.59296	7.20981	7.01397	6.76969	7.61884
2900	P05161	Ubiquitin-like protein ISG15	ISG15	0.506943	0.484469	-0.0224744	yes	no	6.0324e-16	4637800000	4	4	4	4	4	4	4	4	4	4	4	4	4	4	23	17.887	165	10	10	12	9	9	8	23	23	23	23	23	23	8.84469	8.68701	8.32824	9.05057	8.8673	8.58744	8.90093	8.73823	8.39573	8.75909
2504	O43704;D6RD70;D6RIA8	Sulfotransferase family cytosolic 1B member 1	SULT1B1	0.497879	0.183589	-0.31429	yes	no	1.0208e-60	3443800000	10	10	8	7	7	5	7	6	8	7	7	5	7	6	38.9	34.899	296	17	17	16	11	15	14	35.8	32.1	28.4	25.3	31.8	28	8.73037	8.54952	8.26264	8.75882	8.50644	8.40302	8.82058	8.63466	8.3625	8.6034
2194	H0Y6A0		ARFGAP3	0.49715	-1.42444	-1.92159	yes	no	2.1328e-98	671460000	9	4	7	8	6	8	9	8	4	4	4	4	4	4	26.7	29.956	273	6	8	7	8	9	7	18.3	23.1	15	22	26.7	22	8.00552	7.52845	7.8294	8.05633	7.55101	7.89366	7.93601	7.58468	7.68005	8.27896
5721	Q96RD7;Q96RD7-2	Pannexin-1	PANX1	0.496799	0.752534	0.255736	yes	no	4.3617e-30	517640000	5	5	3	2	4	3	3	2	3	2	4	3	3	2	17.4	48.05	426	6	3	7	6	5	3	11.3	9.4	17.4	12.2	12.2	6.1	7.74039	7.61738	7.13252	7.64322	7.50558	7.07711	8.15951	8.02804	7.57649	7.86318
403	Q96S97;B4DG42;C9JC07;C9J5M0;C9JZL8;C9JJV6	Myeloid-associated differentiation marker	MYADM	0.492154	0.526639	0.0344853	yes	no	6.0117e-18	4844900000	4	4	3	3	2	3	3	3	3	3	2	3	3	3	19.3	35.273	322	11	13	14	13	11	10	13.7	12.1	6.5	13.7	13.7	13.7	8.90785	8.74849	8.3952	9.04403	8.83643	8.6238	8.95354	8.80677	8.41106	8.75527
3567	P48200;H0YKU0;H0YNL8;H0YL48;H0YMA8	Iron-responsive element-binding protein 2	IREB2	0.491733	-0.464459	-0.956192	yes	no	2.4734e-18	137080000	2	2	2	1	2	0	2	2	2	1	2	0	2	2	4.2	105.04	963	3	2	3	0	3	3	4.2	2	4.2	0	4.2	4.2	7.37299	7.1377	6.99446	7.05941	6.62125	6.86246	7.5672	7.3256	7.19731	NaN
5700	Q96PP9	Guanylate-binding protein 4	GBP4	0.490513	-0.285698	-0.776211	yes	no	5.4987e-11	349920000	4	4	4	3	4	2	1	2	4	3	4	2	1	2	9.4	73.164	640	4	3	4	2	1	2	9.4	8.3	9.4	5.6	3.1	4.2	7.85176	7.62432	7.46207	7.54276	7.25969	7.22303	7.83322	7.61474	7.43016	7.31551
1466	Q8IZF2;E9PBS6;Q8IZF2-2;Q8IZF2-3;F5GWK9;H0YFX7	Probable G-protein coupled receptor 116	GPR116	0.486293	-0.249142	-0.735435	yes	no	4.9907e-48	819240000	8	8	8	7	7	6	5	6	8	7	7	6	5	6	7.1	149.46	1346	13	12	11	8	8	9	7.1	7.1	7.1	6.2	5.5	5.6	8.21751	7.98112	7.84051	8.2331	7.98736	7.8687	8.28384	8.01435	7.94881	7.95296
1154	Q9NNW7;D3YTF9;F5H2M2;F5H2V0;D3YTF8;Q9NNW7-2;E7ENA2;F5H1L4;E7EWK1;Q9NNW7-3;F6WBI2;Q9NNW7-4	Thioredoxin reductase 2, mitochondrial	TXNRD2	0.485786	0.50648	0.0206941	yes	no	2.9594e-38	585690000	3	2	2	3	3	2	3	3	1	2	2	1	2	2	8.6	56.524	524	1	3	4	1	2	3	6.7	8.6	8.6	6.7	8.6	8.6	7.59161	7.40805	7.12908	8.21029	8.01724	7.76524	8.07606	7.90966	7.57889	7.64408
2654	O75592;O75592-2	Probable E3 ubiquitin-protein ligase MYCBP2	MYCBP2	0.485484	-0.1125	-0.597984	yes	no	4.2064e-39	749100000	11	11	10	11	9	9	10	8	10	11	9	9	10	8	3.6	510.08	4640	16	16	13	12	16	9	3.2	3.6	2.6	2.7	3.4	2.5	8.07085	7.87302	7.6342	7.87386	7.58939	7.5556	8.30969	8.11106	7.87441	8.1848
3290	P26572;E7EPF6;D6RF69	Alpha-1,3-mannosyl-glycoprotein 2-beta-N-acetylglucosaminyltransferase	MGAT1	0.484081	0.207644	-0.276437	yes	no	5.9929e-73	703120000	8	8	4	6	4	4	4	6	4	6	4	4	4	6	24.7	50.878	445	8	10	9	3	8	9	14.8	18.7	14.8	16	14.8	20.9	7.93986	7.80953	7.35359	8.08718	7.82396	7.74475	7.97367	7.79238	7.50676	7.61002
525	B4DR87;Q02809;E7EWK8;Q5JXB7;Q5JXB9;Q5JXB8	Procollagen-lysine,2-oxoglutarate 5-dioxygenase 1	PLOD1	0.482331	0.405088	-0.077243	yes	no	4.0286e-259	25654000000	27	27	24	24	27	24	22	24	24	24	27	24	22	24	48.6	88.271	774	90	84	97	82	80	77	42.2	42.8	48.6	42.2	39.8	43.4	9.54275	9.36594	9.06707	9.63098	9.43447	9.19201	9.68393	9.51779	9.18619	9.62057
1207	Q6ZT07;E2QRM0	TBC1 domain family member 9	TBC1D9	0.481954	0.335299	-0.146655	yes	no	2.0581e-22	364570000	4	2	3	3	4	3	3	3	2	2	2	2	2	2	3.6	143.23	1266	5	4	5	4	4	6	3	3	3.6	3	3	3	7.85072	7.71397	7.28228	7.58616	7.39575	7.13637	7.75118	7.65137	7.06363	7.93365
506	Q0ZGT2;Q0ZGT2-2;B4DPZ7;Q0ZGT2-3;E7EUA0;E7ETM8;E7EQF0	Nexilin	NEXN	0.478328	0.219388	-0.258941	yes	no	6.2505e-115	1369200000	10	10	9	9	10	9	8	10	9	9	10	9	8	10	18.1	80.657	675	28	27	27	25	25	27	17.9	17.9	18.1	17.9	15.4	18.1	8.34179	8.17009	7.8558	8.27351	8.053	7.87355	8.494	8.33796	7.97381	8.44515
3256	P24310	Cytochrome c oxidase subunit 7A1, mitochondrial	COX7A1	0.477445	-0.762136	-1.23958	yes	no	8.1484e-08	276490000	1	1	1	1	1	1	1	1	1	1	1	1	1	1	16.5	9.1174	79	3	3	4	2	3	4	16.5	16.5	16.5	16.5	16.5	16.5	7.33552	7.01816	7.05023	7.43619	7.05377	7.20371	7.84673	7.48937	7.59555	7.01999
1707	F5GX82;O94915;F2Z2S2;H0Y9X0;O94915-2;D6RJI4;D6R9B9	Protein furry homolog-like	FRYL	0.471756	0.376845	-0.0949116	yes	no	1.0019e-247	4242500000	29	29	17	16	18	15	22	21	17	16	18	15	22	21	14.2	339.59	3013	38	37	39	33	40	47	8.6	7.9	8.6	8	11	11.7	9.02653	8.86158	8.5263	8.7423	8.50998	8.35961	8.76215	8.59303	8.27073	8.68711
4972	Q7Z7F0;Q7Z7F0-2;Q7Z7F0-3	UPF0469 protein KIAA0907	KIAA0907	0.471678	-0.56472	-1.0364	yes	no	6.036e-35	207910000	2	2	2	2	2	1	2	2	2	2	2	1	2	2	7.2	64.845	614	3	2	2	2	3	2	7.2	7.2	7.2	3.6	7.2	7.2	7.64979	7.37311	7.32296	7.55306	7.25406	7.24996	7.56679	7.37315	7.12281	7.65386
5144	Q8N122;F5H7J5	Regulatory-associated protein of mTOR	RPTOR	0.471531	0.451189	-0.0203421	yes	no	1.9627e-21	236180000	5	5	4	3	2	2	4	4	4	3	2	2	4	4	6.5	149.04	1335	4	4	3	2	6	5	5.5	4	2.1	2.7	5.5	5.3	7.52897	7.374	7.00625	7.68822	7.443	7.32313	7.65771	7.51109	7.11484	7.19554
931	E9PLW3;F8VPK4;C9J9T8;F8WEJ2;C9JED0;C9JJ27;B0UYU4;C9JK67;G5E9P8;Q5SRN2;A6NLS9;A6NN32;B0UYU3;G3XAK7;Q5SRN2-2;E9PMB1;F8VVU2;H0YI45;E9PNQ4	Uncharacterized protein C6orf10	C6orf10	0.470776	0.638592	0.167816	yes	no	2.2642e-06	452350000	3	3	2	1	1	2	2	1	2	1	1	2	2	1	5.7	59.629	547	1	2	2	2	1	2	3.7	2	2	4	3.7	2	7.79046	7.67154	7.16982	7.49046	7.31144	7.01912	8.16409	8.01895	7.61748	7.93641
6602	Q9UHI8;E5RI60	A disintegrin and metalloproteinase with thrombospondin motifs 1	ADAMTS1	0.469117	1.21531	0.746195	no	no	2.7697e-30	403680000	4	4	2	3	3	3	3	1	2	3	3	3	3	1	8.8	105.36	967	2	3	4	3	3	1	4.8	7.9	7.9	5.7	7.9	3.3	7.67457	7.59187	6.91359	7.76139	7.6567	7.09226	7.99069	7.90105	7.26136	8.10602
4922	Q7L5N7;Q7L5N7-2	Lysophosphatidylcholine acyltransferase 2	LPCAT2	0.463192	0.102434	-0.360758	no	no	2.3848e-112	4046000000	13	13	8	8	8	7	7	7	8	8	8	7	7	7	32.9	60.207	544	25	24	24	21	22	24	22.6	21.1	18.8	17.5	17.5	17.1	8.8746	8.69925	8.39599	8.71378	8.46716	8.35056	8.95399	8.7637	8.50394	8.67696
3921	P63096;B4E2V1;C9JPP4;C9JL77	Guanine nucleotide-binding protein G(i) subunit alpha-1	GNAI1	0.460073	0.243711	-0.216362	no	no	1.8594e-161	1461900000	13	5	13	12	12	12	12	11	5	4	4	4	4	3	37.9	40.361	354	15	13	11	12	11	12	37.9	37.9	37.9	37.9	37.9	33.6	8.55201	8.37559	8.07555	8.29438	8.06134	7.91269	8.41896	8.24859	7.93022	8.3441
295	B1AZV3;Q03518;F5H648	Antigen peptide transporter 1	TAP1	0.459384	-0.131721	-0.591105	no	no	5.6572e-76	1463200000	7	7	5	4	6	3	5	6	5	4	6	3	5	6	14.9	87.175	808	9	10	11	8	10	10	11.4	7.7	13.6	5.7	11.4	12.6	8.34161	8.05649	8.02407	8.30198	8.04258	7.95493	8.49795	8.28463	8.08686	8.25857
1412	O15123;O15123-3;E7EVQ3;O15123-2	Angiopoietin-2	ANGPT2	0.456802	0.0295585	-0.427244	no	no	1.8845e-31	467260000	3	3	2	2	3	1	2	1	2	2	3	1	2	1	11.3	56.919	496	2	4	5	1	3	3	8.5	8.5	11.3	5	8.5	5	7.75115	7.58072	7.26247	7.72483	7.53125	7.28071	8.25159	8.03866	7.83994	7.31662
2323	O00507;O00507-2	Probable ubiquitin carboxyl-terminal hydrolase FAF-Y	USP9Y	0.455939	-0.620962	-1.0769	no	no	5.1752e-117	152630000	27	3	16	19	19	16	17	19	3	3	3	2	2	2	10.7	291.07	2555	3	3	3	3	2	2	6.2	7.5	7.6	6.3	6.5	7.4	7.46442	7.21088	7.11005	7.47422	7.12688	7.21503	7.45361	7.21312	7.08221	7.46127
1740	O94887;O94887-2;F5GZ84;C9JVQ5;C9JWM9	FERM, RhoGEF and pleckstrin domain-containing protein 2	FARP2	0.455163	0.507879	0.0527155	no	no	4.6085e-27	287920000	3	3	1	3	2	3	3	2	1	3	2	3	3	2	6.4	119.89	1054	1	4	2	3	3	3	1.9	6.4	5	6.4	6.4	3.2	6.86641	6.6216	6.50077	7.53259	7.36314	7.04191	7.86514	7.70313	7.35841	7.97186
2024	P06396;F5H1A8;P06396-2;F8WA45;F5H8M4;Q5T0H9;Q5T0I0;Q5T0H8;Q5T0H7	Gelsolin	GSN	0.453002	-0.725872	-1.17887	no	no	0	1184000000	21	1	18	19	18	18	18	18	1	1	1	1	1	1	33.2	85.696	782	4	6	8	7	5	6	28.6	29.7	29.3	28.1	29.7	28.3	8.2711	8.02412	7.90832	8.26881	7.84897	8.061	8.27117	7.99334	7.94563	8.19526
5845	Q9BRF8;Q9BRF8-2	Calcineurin-like phosphoesterase domain-containing protein 1	CPPED1	0.452398	0.0849151	-0.367483	no	no	5.9388e-102	15838000000	12	12	12	12	11	11	11	11	12	12	11	11	11	11	47.5	35.548	314	19	21	20	17	16	16	47.5	47.5	42.7	42	45.2	42.7	9.41804	9.30328	8.78393	9.50558	9.36855	8.93793	9.36556	9.16735	8.92958	9.50099
4622	Q5JSZ5;Q5JSZ5-5;G8JLK2;F5H662;Q5JSZ9;H0Y412	Protein PRRC2B	PRRC2B	0.451154	0.140348	-0.310805	no	no	3.935e-62	323060000	9	7	4	6	7	6	5	7	2	4	5	4	3	5	6.4	242.96	2229	6	6	9	8	5	7	2.5	3.9	4.7	3.7	3.1	5.1	7.51372	7.35955	6.98913	7.70294	7.43443	7.36676	7.73482	7.53585	7.30014	7.7644
3746	P54652;B3KUS2	Heat shock-related 70 kDa protein 2	HSPA2	0.448053	0.424726	-0.0233263	no	no	3.7083e-142	438710000	22	6	19	16	18	17	17	18	4	2	4	2	2	3	31	70.02	639	8	6	8	8	7	7	25	20.7	27.2	21.1	21	25.2	8.08282	7.91609	7.58632	7.51808	7.30563	7.10568	8.188	7.99578	7.74147	7.66431
711	P40123;B7Z1C4;E9PDI0;B7Z385;E9PDI2;B7Z214;F8WEW0;F8WDB9	Adenylyl cyclase-associated protein 2;Adenylyl cyclase-associated protein	CAP2	0.445767	-0.53067	-0.976437	no	no	1.4102e-67	868690000	8	7	5	5	5	4	7	6	4	4	4	3	6	5	28.7	52.823	477	7	6	8	6	7	9	17.2	17.2	17.2	14.9	23.1	22.9	8.18893	7.93447	7.83575	7.99893	7.65268	7.73885	8.27545	7.99729	7.95027	8.02772
273	Q9NRA8;B1AKL4;B1AKL3;Q9NRA8-2;B1AKL5;B1AKL6	Eukaryotic translation initiation factor 4E transporter	EIF4ENIF1	0.445626	-0.0412431	-0.486869	no	no	9.8851e-18	265850000	3	3	2	2	3	3	2	2	2	2	3	3	2	2	4	108.2	985	5	5	5	6	6	6	1.7	1.7	4	4	1.7	1.7	7.38459	7.13966	7.01912	7.50007	7.19712	7.20096	7.68953	7.45672	7.30754	7.81598
1976	F8W6L6;P35580-2;P35580;F8VTL3;P35580-3;E7ERA5	Myosin-10	MYH10	0.443603	0.893786	0.450183	no	no	0	58002000000	127	93	111	114	109	98	97	104	78	80	80	67	67	73	55.6	230.77	1992	284	295	288	237	248	260	50.5	52.1	50.2	46	45.9	48.7	9.99993	9.87958	9.3838	9.97728	9.81465	9.47192	10.136	10.0132	9.52738	9.8769
3209	P21589;B3KQI8;H0Y7R7;Q96B60;E9PGM0;H0Y3X5	5-nucleotidase	NT5E	0.442813	0.138886	-0.303927	no	no	1.1481e-300	16008000000	25	25	23	22	21	18	21	20	23	22	21	18	21	20	53	63.367	574	57	58	67	47	54	56	48.8	50.7	49.7	43.7	50.3	47.4	9.3958	9.21661	8.92479	9.46084	9.26409	9.0223	9.50568	9.32321	9.041	9.41079
2796	O95759;O95759-2	TBC1 domain family member 8	TBC1D8	0.441202	-1.89359	-2.3348	no	no	1.4802e-43	190390000	4	4	2	3	2	2	2	4	2	3	2	2	2	4	6.8	130.83	1140	2	4	4	4	2	5	2.8	5.7	2.8	4.6	4.6	6.8	7.38462	6.93262	7.19543	7.55278	6.95335	7.42695	7.58296	7.085	7.41692	7.23975
5195	Q8N6G6;Q8N6G6-4;Q8N6G6-1;Q8N6G6-2;Q8N6G6-6;G8JLH3;Q8N6G6-5;A6NIB9;F8WEP3	ADAMTS-like protein 1	ADAMTSL1	0.440587	1.94125	1.50067	no	no	5.8436e-54	1175500000	8	8	2	5	5	4	2	3	2	5	5	4	2	3	6.2	193.41	1762	3	8	7	9	4	4	2.4	4.2	4.3	3.7	2.4	2.8	7.80422	7.73539	6.97025	8.54078	8.36252	8.06796	8.57588	8.35991	8.16897	8.00988
4191	Q13201;E7EPG1;Q13201-2	Multimerin-1;Platelet glycoprotein Ia*;155 kDa platelet multimerin	MMRN1	0.440453	0.754164	0.31371	no	no	2.1222e-280	4628600000	27	27	19	15	23	13	15	12	19	15	23	13	15	12	29.7	138.11	1228	35	29	43	20	26	22	22	17	26.1	16.5	18.8	13.4	8.93194	8.78048	8.40092	8.99781	8.81858	8.52688	9.069	8.90781	8.56044	8.67506
1539	Q8IXQ6;Q8IXQ6-2;E9PFM7;C9K0E5	Poly [ADP-ribose] polymerase 9	PARP9	0.439304	0.0869977	-0.352307	no	no	5.1893e-48	765660000	4	4	4	3	2	3	3	2	4	3	2	3	3	2	9.6	96.342	854	8	6	7	6	7	5	9.6	7.6	4	7.6	7.6	4	8.052	7.87957	7.56745	8.01737	7.76442	7.66222	8.33632	8.17167	7.83537	7.93495
3241	P23458	Tyrosine-protein kinase JAK1	JAK1	0.439285	-0.253142	-0.692427	no	no	3.3145e-246	7192900000	27	26	18	17	20	20	20	19	17	16	19	19	19	18	28.6	133.28	1154	43	38	44	41	46	40	20.6	19.2	23.8	22.8	21.7	21.5	9.01381	8.78921	8.61997	9.00958	8.72886	8.68719	9.16729	8.96178	8.7436	9.14311
3996	P98198-3;P98198	Probable phospholipid-transporting ATPase ID	ATP8B2	0.437891	-0.433073	-0.870964	no	no	2.7462e-30	62714000	1	1	1	1	1	1	1	0	1	1	1	1	1	0	2	138.72	1223	2	2	1	2	2	0	2	2	2	2	2	0	7.21492	6.91671	6.91107	6.78193	6.51318	6.44602	6.76186	6.48206	6.43851	7.33947
4826	Q6P3S6	F-box only protein 42	FBXO42	0.437519	0.321892	-0.115627	no	no	4.1199e-07	123480000	1	1	1	1	1	1	1	1	1	1	1	1	1	1	1.7	77.838	717	4	3	2	3	1	2	1.7	1.7	1.7	1.7	1.7	1.7	7.50698	7.31538	7.0593	7.47586	7.18594	7.16343	7.18264	6.95331	6.79566	7.23348
281	Q14155-5;B7Z6G2;B1ALK7;Q14155-1;Q14155;Q14155-3;Q14155-2;H0YFH7;Q14155-6;E7EUY6;E9PDQ5;E7EU80;E7ENL8;B1ANY6;C9JDI6;Q15052;B7Z3C7;F5H8B2;Q15052-2;B7Z6D9;C9JAD7	Rho guanine nucleotide exchange factor 7	ARHGEF7	0.43435	0.0913408	-0.34301	no	no	2.6106e-112	5097300000	14	14	12	8	9	10	12	12	12	8	9	10	12	12	26.8	82.57	731	38	29	31	34	33	31	20.9	15.6	14.1	18.7	22.8	21.3	8.95101	8.76765	8.48807	8.81711	8.57166	8.45232	9.03153	8.8724	8.51836	8.81068
2423	O15228;Q5TBH8;B4DNM9;Q5TBH6	Dihydroxyacetone phosphate acyltransferase	GNPAT	0.434099	0.378626	-0.0554733	no	no	5.7644e-94	2033300000	16	16	6	9	11	13	9	9	6	9	11	13	9	9	32.9	77.187	680	10	12	15	21	13	11	12.9	19.7	24.1	27.8	18.1	20.3	8.4574	8.31112	7.91372	8.44635	8.23053	8.03926	8.61387	8.44534	8.12123	8.67532
1145	P30038;D2D4A3;B4DGE4;Q5TF55;C9JTC4;E9PF68	Delta-1-pyrroline-5-carboxylate dehydrogenase, mitochondrial	ALDH4A1	0.433512	0.16125	-0.272262	no	no	5.6076e-55	1526100000	7	7	4	3	3	5	3	4	4	3	3	5	3	4	19.4	61.719	563	6	6	4	10	5	6	13.5	8.9	10.7	14.6	8.2	10.3	8.34303	8.17313	7.85332	8.23129	7.94768	7.91211	8.45301	8.13704	8.16643	8.66514
5115	Q8IY33;B7WPH4;Q8IY33-2;Q8IY33-4;D3YTD2;Q8IY33-5;Q8IY33-3	MICAL-like protein 2	MICALL2	0.433325	-0.176067	-0.609392	no	no	1.6085e-15	405250000	3	3	2	3	2	2	1	3	2	3	2	2	1	3	6.9	97.501	904	2	3	2	2	1	3	4.5	6.9	4.8	4.8	2.4	6.9	7.86733	7.66281	7.44201	7.92443	7.62189	7.6249	7.80232	7.64314	7.28925	7.71994
2148	G5E9W9;Q9NUV9;B4DWN0;C9IZQ3;C9JPL9	GTPase IMAP family member 4	GIMAP4	0.433219	-0.0412431	-0.474462	no	no	7.5429e-256	9152700000	15	14	11	12	11	12	11	13	10	11	10	11	10	12	41.1	39.033	343	53	52	52	59	53	55	27.4	29.4	27.4	32.1	27.4	34.4	9.18713	8.99773	8.73547	9.17935	8.94176	8.80402	9.20621	9.0159	8.7562	9.13383
3630	P50135;P50135-2;Q9BRW6	Histamine N-methyltransferase	HNMT	0.43321	-0.173895	-0.607105	no	no	1.2286e-15	539110000	1	1	1	1	1	1	1	1	1	1	1	1	1	1	5.8	33.295	292	4	4	4	3	4	4	5.8	5.8	5.8	5.8	5.8	5.8	7.99357	7.7761	7.58897	7.9592	7.72767	7.57538	7.87388	7.63407	7.50157	7.78803
6752	Q9UPU9;Q9UPU9-3;Q9UPU9-2;G3V2R1	Protein Smaug homolog 1	SAMD4A	0.431405	0.781136	0.349732	no	no	1.1944e-39	278230000	3	3	2	3	1	1	3	2	2	3	1	1	3	2	7.2	79.414	718	2	4	1	2	4	2	5.2	7.2	1.8	3.3	7.2	5.2	7.62827	7.54073	6.88965	7.8613	7.66416	7.42343	6.79584	6.66601	6.20812	7.75387
2563	O60568;F5H723;C9JU11;C9JIX5	Procollagen-lysine,2-oxoglutarate 5-dioxygenase 3	PLOD3	0.428394	0.110511	-0.317883	no	no	1.8584e-180	18998000000	21	21	17	17	19	16	16	19	17	17	19	16	16	19	37.4	84.784	738	49	48	45	51	51	47	33.3	30.9	35.2	32.2	32.5	35.8	9.38187	9.20162	8.91293	9.40216	9.15585	9.03846	9.57769	9.399	9.10571	9.53891
345	P49796;P49796-6;P49796-4;B3KUB2;P49796-5;P49796-1;E9PFF1;Q5VZ06;P49796-2;Q5VXC0;C9J582	Regulator of G-protein signaling 3	RGS3	0.42828	0.0723613	-0.355918	no	no	4.9513e-21	386720000	4	4	3	4	2	3	2	2	3	4	2	3	2	2	3.8	132.33	1198	4	9	3	4	5	4	2	3.8	1.4	3.2	1.4	1.4	7.7943	7.60094	7.34978	8.06077	7.75909	7.7604	7.45585	7.24623	7.0389	8.0613
4459	Q16394	Exostosin-1	EXT1	0.427072	0.506025	0.0789531	no	no	1.6372e-29	80364000	2	2	2	2	2	1	2	2	2	2	2	1	2	2	5.4	86.254	746	3	4	3	1	4	2	5.4	5.4	5.4	1.9	5.4	5.4	7.19058	7.01749	6.70739	7.04222	6.78742	6.68948	7.38789	7.25271	6.81519	6.16616
5678	Q96ME1-4;Q96ME1;F5H4Z4;Q96ME1-2;H0Y6I6;Q96ME1-3	F-box/LRR-repeat protein 18	FBXL18	0.425775	0.154827	-0.270947	no	no	9.07e-23	408770000	5	5	2	4	3	3	2	3	2	4	3	3	2	3	10	78.919	718	3	5	5	4	4	6	3.5	7	7.1	5.6	3.5	6.5	7.50157	7.26129	7.12985	7.89749	7.63914	7.54913	7.85599	7.64954	7.43388	7.70552
173	Q2PPJ7;A8MSM5;Q2PPJ7-2;Q2PPJ7-3	Ral GTPase-activating protein subunit alpha-2	RALGAPA2	0.425771	-0.515561	-0.941332	no	no	1.966e-56	344400000	8	8	1	5	4	4	6	5	1	5	4	4	6	5	6.1	210.77	1873	1	5	4	4	5	5	0.7	4.2	3.7	3	4.8	4.3	7.03683	6.79787	6.66334	7.80662	7.37696	7.60471	7.89735	7.6469	7.53906	7.65772
4483	Q16762;E7EN05;B1AH48	Thiosulfate sulfurtransferase;Sulfurtransferase	TST	0.424617	-0.0662615	-0.490878	no	no	3.1922e-90	3024900000	10	10	10	8	8	7	9	7	10	8	8	7	9	7	39.1	33.429	297	16	16	11	8	12	10	39.1	35.7	35.7	32.7	35.7	32.7	8.82475	8.62818	8.38589	8.83177	8.54739	8.51343	8.67522	8.44646	8.28744	8.56873
2492	O43520	Probable phospholipid-transporting ATPase IC	ATP8B1	0.424349	-0.487075	-0.911423	no	no	2.1291e-98	1109100000	6	6	5	6	4	5	3	4	5	6	4	5	3	4	8.9	143.69	1251	12	11	12	11	8	8	7.8	8.9	6.1	7.8	4.4	6.1	8.22814	7.94451	7.90898	8.12398	7.74398	7.88976	8.26647	7.98363	7.94644	8.29537
4210	Q13393;Q13393-2;Q13393-4;Q13393-3;C9IY79;F8WBV7	Phospholipase D1	PLD1	0.423181	-0.632361	-1.05554	no	no	6.096e-222	5300900000	19	19	14	15	13	12	13	17	14	15	13	12	13	17	25.3	124.18	1074	31	36	31	29	32	32	19.7	20.3	18.4	16.8	18.4	23.3	8.94659	8.6775	8.61109	8.85311	8.51408	8.58701	8.99433	8.74227	8.63811	8.8413
4037	Q02252;G3V4Z4	Methylmalonate-semialdehyde dehydrogenase [acylating], mitochondrial	ALDH6A1	0.422707	-0.511772	-0.934479	no	no	3.3386e-65	1382000000	10	10	7	5	6	6	5	4	7	5	6	6	5	4	28.4	57.839	535	12	11	10	9	10	9	19.6	13.3	18.1	21.1	19.4	11.8	8.42109	8.14504	8.09353	8.24964	7.90968	7.98433	8.31313	8.02301	8.00091	8.29942
3989	P98160;Q5SZI9;Q5SZJ2;Q5SZJ1;H0Y3B2;H0YEP4	Basement membrane-specific heparan sulfate proteoglycan core protein;Endorepellin;LG3 peptide	HSPG2	0.422135	-0.44742	-0.869556	no	no	0	175690000000	139	139	117	123	122	122	115	116	117	123	122	122	115	116	49.8	468.83	4391	356	379	384	339	329	327	41.6	42.8	44.8	44.6	41.2	40.8	10.4046	10.1502	10.0514	10.5221	10.2163	10.2258	10.5021	10.2574	10.1363	10.4398
6823	Q9Y2X7-3;Q9Y2X7;E7EVC2;Q9Y2X7-2	ARF GTPase-activating protein GIT1	GIT1	0.421038	-0.0282861	-0.449324	no	no	6.4116e-115	2035400000	14	12	9	11	9	9	8	11	8	9	7	8	6	9	30.8	85.445	770	11	12	10	12	11	15	22.5	23.8	19.4	24.3	20.1	21.8	8.24942	8.01611	7.86816	8.47586	8.16864	8.18093	8.59864	8.39914	8.16486	8.40766
3460	P38936	Cyclin-dependent kinase inhibitor 1	CDKN1A	0.419889	0.967673	0.547784	no	no	3.739e-09	612620000	3	3	2	3	2	3	2	2	2	3	2	3	2	2	18.9	18.119	164	3	6	2	4	4	3	11.6	18.9	12.2	18.9	14	14	7.76112	7.56007	7.32995	8.30548	8.17365	7.72352	7.97709	7.82637	7.44429	8.03818
4682	Q5T5U3;E9PED6;F8W9U9;Q5T5U3-3;E7ESW5;F8W7V1;H0Y468	Rho GTPase-activating protein 21	ARHGAP21	0.41846	-0.0923428	-0.510803	no	no	1.0484e-20	202030000	5	5	2	2	3	1	5	3	2	2	3	1	5	3	3.9	217.33	1957	2	2	3	1	5	2	1.4	1.4	2	0.7	3.9	2	7.51268	7.30205	7.09736	7.20699	6.87736	6.93281	7.60702	7.34939	7.25775	7.55838
533	B4DRT5;P48454;P48454-2;G3V111;H0YC26;H0YB04	Serine/threonine-protein phosphatase;Serine/threonine-protein phosphatase 2B catalytic subunit gamma isoform	PPP3CC	0.416641	-0.0420046	-0.458645	no	no	2.3127e-22	155410000	5	3	3	2	3	4	3	4	2	1	2	2	2	3	12.5	59.261	521	4	1	3	2	1	3	6	4.2	6	10.7	6	10.7	7.60946	7.44674	7.10428	6.44126	6.17032	6.10789	7.5381	7.35195	7.08037	7.42506
5033	Q86X27;Q86X27-2;Q5JS13;E9PBQ5;Q5JS13-2;Q5JS13-3;Q5JS13-4;F5H4A6;H0Y338	Ras-specific guanine nucleotide-releasing factor RalGPS2	RALGPS2	0.416377	0.45508	0.0387027	no	no	9.1669e-10	230160000	4	4	2	2	2	1	2	1	2	2	2	1	2	1	12.5	65.166	583	6	5	5	5	5	4	7	3.6	4.6	1.4	7	1.4	7.68772	7.54322	7.13956	7.52843	7.33516	7.08375	7.53769	7.39634	6.98143	7.63464
6527	Q9P2N7-5;Q9P2N7;Q9P2N7-4;Q9P2N7-3;Q9P2N7-2	Kelch-like protein 13	KLHL13	0.415967	0.661798	0.245831	no	no	2.1331e-23	434790000	5	3	3	5	3	2	2	3	3	3	3	2	2	3	10.5	74.629	658	11	6	6	7	6	8	7.3	10.5	7.3	3.8	3.8	7.3	7.97603	7.84176	7.40081	7.5744	7.35681	7.17	7.76471	7.64908	7.13348	7.92051
6470	Q9NZJ4;Q9NZJ4-2;E9PGV8;H0Y6M8;E9PAL4;B2REB0	Sacsin	SACS	0.41418	0.386035	-0.0281449	no	no	2.1397e-114	935910000	21	21	12	11	8	7	13	13	12	11	8	7	13	13	7.1	521.12	4579	14	13	12	7	17	19	3.8	3.9	2.8	2.1	4.3	4.2	7.86198	7.66357	7.42633	8.30421	8.00856	7.99773	8.30367	8.04234	7.95893	7.81467
2760	O95302;B7Z1U8;B7Z230;B7Z1G9;F5GZ14;C9J4P8;Q75LS8	Peptidyl-prolyl cis-trans isomerase FKBP9	FKBP9	0.412278	0.130729	-0.28155	no	no	2.0898e-50	1316300000	9	2	7	6	7	8	7	5	2	1	1	2	2	1	13.2	63.083	570	10	6	8	7	9	5	9.8	10	11.6	11.4	10	8.2	8.34598	8.16164	7.88491	8.13111	7.90712	7.73638	8.44306	8.23578	8.0223	8.18806
4861	Q6UWJ1;Q6UWJ1-2;Q6UWJ1-3	Transmembrane and coiled-coil domain-containing protein 3	TMCO3	0.410647	0.152067	-0.258579	no	no	3.814e-19	483210000	2	2	2	2	1	2	2	2	2	2	1	2	2	2	5.3	75.597	677	2	2	2	2	2	2	5.3	5.3	2.7	5.3	5.3	5.3	7.80828	7.60246	7.38512	7.71714	7.50534	7.30367	8.09968	7.92866	7.61224	8.17618
6745	Q9UPR3;H0Y5T3;Q5SZX1	Protein SMG5	SMG5	0.410521	0.669602	0.259081	no	no	3.4897e-13	106710000	3	3	2	2	2	2	3	3	2	2	2	2	3	3	3	113.93	1016	2	2	2	4	3	3	1.9	1.9	1.9	1.9	3	3	7.02723	6.88606	6.47053	7.0425	6.84377	6.60735	7.28443	7.1337	6.75165	7.1065
952	Q5HYK7;C9JDW6;Q5HYK7-2;Q5HYK7-3;Q5HYK7-4;Q5HYK7-5	SH3 domain-containing protein 19	SH3D19	0.410319	-0.228357	-0.638676	no	no	2.1058e-20	627670000	5	5	2	4	2	4	3	3	2	4	2	4	3	3	6.1	86.524	790	6	7	6	7	5	9	2	4.8	2	4.8	3.5	3.4	7.65014	7.44623	7.22383	8.12231	7.82527	7.81729	7.77923	7.58276	7.34019	8.14151
4438	Q15746;Q15746-6;Q15746-3;Q15746-2;Q15746-5;Q15746-4;Q15746-7;B4DUE3;D6R9C2	Myosin light chain kinase, smooth muscle;Myosin light chain kinase, smooth muscle, deglutamylated form	MYLK	0.408998	-1.13895	-1.54794	no	no	1.1895e-25	1270000000	6	5	5	5	4	4	6	4	4	5	4	4	5	4	4.2	210.71	1914	5	6	5	4	7	4	3.3	3.2	2.4	2.4	4.2	2.4	8.25479	7.96061	7.94678	8.26195	7.94399	7.97724	8.26635	7.9288	7.99901	8.35597
395	P48735;B4DFL2;B4DSZ6;H0YL11	Isocitrate dehydrogenase [NADP], mitochondrial;Isocitrate dehydrogenase [NADP]	IDH2	0.408903	-0.581689	-0.990592	no	no	5.1565e-178	22092000000	23	21	19	20	20	18	19	21	19	19	19	17	18	19	44.7	50.909	452	68	71	71	62	65	68	39.2	40.5	39.6	37.6	38.1	42	9.45617	9.19421	9.1122	9.60456	9.26806	9.33632	9.62482	9.35641	9.28852	9.42985
831	Q9BZQ6;B7ZLZ2	ER degradation-enhancing alpha-mannosidase-like 3	EDEM3	0.408301	0.47343	0.0651288	no	no	4.3513e-38	385240000	5	5	3	4	5	2	3	3	3	4	5	2	3	3	5.9	104.66	932	8	7	6	3	4	5	4.9	5.9	5.9	3.5	4.9	4.9	7.8513	7.6928	7.3367	7.8854	7.67992	7.46168	7.81675	7.66926	7.27605	7.35879
343	Q9H4B6;B3KTQ1;H0YJH0;H0YJ02	Protein salvador homolog 1	SAV1	0.407869	-0.752406	-1.16027	no	no	2.1997e-12	194180000	3	3	2	2	2	3	2	2	2	2	2	3	2	2	7.8	44.633	383	3	6	3	5	3	4	4.7	4.7	4.7	7.8	4.7	4.7	7.59095	7.29741	7.2823	7.55323	7.10602	7.36137	7.32172	7.02514	7.0162	7.47192
6086	Q9H270;REV__O95342	Vacuolar protein sorting-associated protein 11 homolog	VPS11	0.406927	0.040675	-0.366252	no	no	7.601e-65	2177100000	16	16	7	7	8	7	6	12	7	7	8	7	6	12	23.1	107.84	941	14	19	15	18	13	23	10	10.4	11.5	11.3	9	16.9	8.46829	8.28885	7.99781	8.64307	8.34518	8.33887	8.42537	8.2145	8.01043	8.44616
1555	E9PGD0;F5GXJ4;H0Y860;Q9P246	Stromal interaction molecule 2	STIM2	0.406878	0.113154	-0.293724	no	no	1.4551e-26	154800000	4	3	3	2	3	3	3	3	2	1	2	2	2	2	5.4	93.87	841	4	1	5	2	6	5	3.3	3	3.3	5	3.3	3.3	7.29942	7.12969	6.80932	6.50572	6.21125	6.19802	7.57616	7.38185	7.13328	7.44328
5626	Q96HP0;C9IZV6;E9PDJ4	Dedicator of cytokinesis protein 6	DOCK6	0.406085	-0.528771	-0.934856	no	no	4.4961e-203	4011400000	28	24	20	21	17	20	22	20	16	17	14	16	19	17	19.6	229.56	2047	29	29	24	27	34	28	13.2	15.6	11.4	13.4	15.9	14.2	8.79629	8.54044	8.44484	8.74582	8.4138	8.47371	8.84151	8.60595	8.46336	8.8632
2732	O95025;C9JYT6	Semaphorin-3D	SEMA3D	0.405699	0.660247	0.254548	no	no	7.3106e-42	756760000	5	5	2	3	3	3	2	3	2	3	3	3	2	3	13.1	89.65	777	3	2	3	5	2	5	4.8	7.7	8.1	10.7	6.9	8.8	7.94866	7.76465	7.48695	8.05858	7.85079	7.63866	8.04391	7.93532	7.38876	8.43347
6528	Q9P2P5;Q9P2P5-2;F8WB57;Q76N89;B4DH42	E3 ubiquitin-protein ligase HECW2	HECW2	0.405415	-0.768671	-1.17409	no	no	1.7609e-98	400690000	7	6	4	5	4	4	4	3	3	4	3	3	3	2	6.7	175.77	1572	4	5	3	2	3	3	3.2	5	4.1	4.7	4	3.6	7.46079	7.21532	7.09604	8.11177	7.77644	7.84255	8.07704	7.78803	7.76368	7.20328
3419	P35579;P35579-2;H0Y3P4;Q5BKV1;B1AH99;F5H4L2;Q9Y623;P12883;REV__Q9UKV3;REV__Q9UKV3-5;REV__E7EQT4	Myosin-9	MYH9	0.405193	0.343348	-0.0618453	no	no	0	769490000000	189	157	177	177	179	171	171	174	146	146	150	142	142	145	69.9	226.53	1960	1087	1082	1066	1027	1012	1015	68.4	68.3	68.1	67.1	66.8	67	11.1046	10.9474	10.5871	11.1114	10.9063	10.687	11.1861	11.0241	10.6793	11.0411
5765	Q99439;E7ENR3;A6NFI4	Calponin-2	CNN2	0.405059	0.68499	0.279932	no	no	4.0891e-163	15609000000	14	13	11	13	13	11	9	12	10	12	12	10	8	11	60.5	33.697	309	34	48	43	39	36	43	53.4	50.2	59.5	53.4	36.6	49.2	9.30978	9.17736	8.72949	9.53846	9.35616	9.07346	9.4486	9.31863	8.86128	9.28126
1472	E9PC75;Q8N1W1;Q8N1W1-3;Q8N1W1-4;B5MDA3;D6RGZ3;Q8N1W1-2	Rho-guanine nucleotide exchange factor	RGNEF	0.403498	-0.122871	-0.526369	no	no	1.4504e-52	1344200000	9	9	5	5	7	7	6	4	5	5	7	7	6	4	9.5	194.52	1731	13	12	11	13	14	9	5.4	5.4	6.5	8.4	6.4	3.5	8.29887	8.09174	7.8779	8.23114	7.95106	7.90809	8.35126	8.17638	7.87169	8.3867
2458	O43156	TELO2-interacting protein 1 homolog	TTI1	0.401141	0.577143	0.176002	no	no	2.1135e-27	209050000	3	3	2	2	2	1	3	1	2	2	2	1	3	1	3.9	122.07	1089	3	3	3	1	3	2	2.7	2.7	2.7	1.7	3.9	1.7	7.10931	6.94505	6.60752	7.42588	7.22068	7.00173	7.63427	7.50868	7.03415	6.8053
2436	O15357;O15357-2;F5H3D8;F5GY16	Phosphatidylinositol 3,4,5-trisphosphate 5-phosphatase 2	INPPL1	0.400296	0.236282	-0.164014	no	no	1.0305e-76	2319700000	16	14	6	11	8	8	10	11	6	9	7	7	9	9	14.6	138.6	1258	19	23	17	20	23	19	6.1	11	7.9	8.1	10.4	10.7	8.5548	8.37433	8.08632	8.60722	8.30937	8.30298	8.52554	8.37555	7.99098	8.54415
2398	O15040;H0YMM9;E7EU34	Tectonin beta-propeller repeat-containing protein 2	TECPR2	0.399365	0.505165	0.105799	no	no	1.4324e-11	130070000	3	3	3	3	1	1	3	2	3	3	1	1	3	2	2.1	153.85	1411	5	4	4	2	4	3	2.1	2.1	0.5	0.5	2.1	1.5	7.5293	7.3532	7.05219	7.26914	7.05854	6.85373	7.42416	7.27497	6.88768	6.73255
2114	Q5VWQ8;G3XA90;H0Y3A3;Q5VWQ8-2;Q5VWQ8-4;Q5VWQ8-3;F8WA47;F6R503	Disabled homolog 2-interacting protein	DAB2IP	0.398637	-0.115965	-0.514602	no	no	1.2355e-39	779880000	8	7	3	4	4	4	3	5	2	3	3	3	2	4	9.5	131.62	1189	3	3	4	4	2	4	3.4	5.4	4.4	4	3.4	5.9	7.66074	7.4338	7.27035	7.62699	7.30103	7.34953	8.73161	8.50985	8.33355	7.76904
3095	P14923;C9JKY1;C9JK18;C9J826;C9JTX4;C9JPI2	Junction plakoglobin	JUP	0.398432	0.114629	-0.283803	no	no	9.7176e-203	3039900000	25	10	20	21	22	18	18	18	9	8	10	9	8	7	47.2	81.744	745	12	16	19	16	15	13	39.5	41.3	44.2	35.6	38.5	37.4	8.52709	8.33634	8.07788	8.63355	8.36107	8.30196	8.793	8.61336	8.32288	8.73894
392	P21397;B4DF46	Amine oxidase [flavin-containing] A	MAOA	0.396612	0.547109	0.150497	no	no	1.6076e-46	1820300000	7	7	5	4	3	3	4	4	5	4	3	3	4	4	19.9	59.681	527	14	14	9	9	12	11	15.9	12.9	10.6	11.4	13.5	14.4	8.57663	8.42379	8.04891	8.5472	8.36618	8.07976	8.50375	8.37027	7.92637	8.36581
5712	Q96QD8;Q96QD8-2;F8VUY8	Sodium-coupled neutral amino acid transporter 2	SLC38A2	0.396278	0.434403	0.0381248	no	no	1.9732e-108	7494200000	6	6	5	6	5	6	6	6	5	6	5	6	6	6	17	56.025	506	20	22	26	17	19	22	16.8	17	12.1	17	17	17	9.03571	8.88453	8.50401	9.11823	8.91889	8.68418	9.28571	9.12869	8.7678	8.70853
4885	Q6ZSZ5;Q6ZSZ5-2;Q6ZSZ5-3	Rho guanine nucleotide exchange factor 18	ARHGEF18	0.395544	0.289598	-0.105946	no	no	1.5229e-21	1486900000	4	4	4	4	3	2	3	3	4	4	3	2	3	3	4.9	130.78	1173	4	4	3	2	3	5	4.9	4.9	3.9	1.5	3.3	3.9	8.35759	8.21197	7.81223	8.41466	8.2237	7.9658	8.3912	8.25122	7.83133	8.33971
2632	O75420;A2VDH9	PERQ amino acid-rich with GYF domain-containing protein 1	GIGYF1	0.394698	0.0996799	-0.295018	no	no	9.6183e-17	295900000	4	4	1	3	3	3	3	2	1	3	3	3	3	2	6.7	114.6	1035	4	6	7	8	5	6	0.8	5.4	5.4	3.5	5.4	2.2	7.34052	7.14851	6.89359	7.31429	6.94143	7.07489	7.88475	7.59743	7.56956	7.98708
6483	Q9NZV5;Q9NZV5-2	Selenoprotein N	SEPN1	0.392317	0.775466	0.383148	no	no	2.4378e-23	157650000	2	2	2	1	2	2	2	1	2	1	2	2	2	1	3.2	65.848	590	4	3	3	1	3	3	3.2	2	3.2	3.2	3.2	2	7.34569	7.22814	6.72062	7.12966	6.95159	6.65652	7.41317	7.26484	6.87455	6.65815
120	P21810;A6NLG9;C9JKG1	Biglycan	BGN	0.392224	1.63612	1.2439	no	no	7.5389e-54	3173500000	13	13	8	7	7	4	8	8	8	7	7	4	8	8	47.3	41.654	368	21	13	16	8	14	14	34.2	28.5	28	20.7	33.4	32.3	8.84206	8.69595	8.29798	8.85007	8.65674	8.4055	8.78485	8.61006	8.30511	7.9771
2008	Q13572;F8W8Y9;Q13572-2;G3V5A3;G3V588;H0YJE5;G3V3C0	Inositol-tetrakisphosphate 1-kinase	ITPK1	0.392015	0.0952346	-0.29678	no	no	2.0109e-12	331520000	3	3	3	3	3	2	2	2	3	3	3	2	2	2	9.7	45.621	414	4	5	5	4	5	4	9.7	9.7	9.7	7	7	7	7.74214	7.53636	7.31896	7.78706	7.5594	7.39768	7.935	7.75584	7.46395	7.46391
575	P15882;B4DV19;P15882-2;B8ZZ96;F8W6K2;C9J3G1;C9JR98;C9J3V9	N-chimaerin	CHN1	0.391647	0.192273	-0.199374	no	no	7.8676e-24	179680000	3	3	2	2	1	2	2	3	2	2	1	2	2	3	7.6	53.172	459	2	3	1	2	2	3	5	6.1	3.5	5	5	7.6	7.23424	6.98193	6.87835	7.48316	7.23467	7.12235	7.31986	7.09875	6.92077	7.50243
3084	P14543;P14543-2	Nidogen-1	NID1	0.391313	-0.6219	-1.01321	no	no	9.2295e-228	7529100000	19	18	15	13	15	15	13	13	14	12	14	14	12	12	24.6	136.38	1247	28	28	29	28	29	28	19.5	17.8	18.5	20.9	16.2	16.8	9.01026	8.73955	8.67666	9.05142	8.70961	8.7877	9.14585	8.87914	8.80755	9.01887
5148	Q8N139;Q8N139-2;F8WAP7	ATP-binding cassette sub-family A member 6	ABCA6	0.389726	1.7306	1.34088	no	no	4.9417e-15	217200000	4	4	3	2	2	2	2	0	3	2	2	2	2	0	3.3	184.28	1617	3	2	1	2	2	0	2.8	2.8	2.8	2.8	1.7	0	7.53934	7.47462	6.68063	7.17719	7.10527	6.36078	7.44394	7.41654	6.23019	7.39578
5247	Q8ND82;Q9UJJ2	Zinc finger protein 280C	ZNF280C	0.389035	-0.420725	-0.80976	no	no	2.8052e-08	223110000	1	1	1	1	1	1	1	1	1	1	1	1	1	1	2.3	83.095	737	2	2	2	1	2	2	2.3	2.3	2.3	2.3	2.3	2.3	7.46572	7.23817	7.0762	7.62899	7.26217	7.38509	7.47461	7.225	7.11524	7.36154
6863	Q9Y3M8;Q9Y3M8-2;Q9Y3M8-4;Q9Y3M8-3;Q9Y3M8-5	StAR-related lipid transfer protein 13	STARD13	0.386323	0.250131	-0.136191	no	no	2.6677e-28	513890000	6	6	2	3	4	2	1	3	2	3	4	2	1	3	7.4	124.97	1113	3	4	5	3	2	4	2.2	4.1	4.9	2.2	1	3	7.79936	7.65466	7.25174	7.99185	7.79257	7.5577	8.10199	7.85386	7.74069	7.95808
1831	Q96JI7;F5H3N6;C4B7M2;Q96JI7-2;H0YN34;H0YLK7;H0YLK0	Spatacsin	SPG11	0.385	-0.131721	-0.516721	no	no	2.3998e-45	389830000	7	7	3	4	5	4	3	4	3	4	5	4	3	4	4.8	278.86	2443	5	8	6	6	6	7	1.7	2.3	3	3	1.7	2.3	7.6684	7.42723	7.29794	7.70745	7.44083	7.36905	7.98353	7.7871	7.54443	7.79094
5880	Q9BTC0;Q9BTC0-1	Death-inducer obliterator 1	DIDO1	0.384999	0.411483	0.0264843	no	no	5.4253e-53	493720000	6	6	3	3	3	3	4	5	3	3	3	3	4	5	5.1	243.87	2240	3	3	3	3	4	5	2.1	2.1	3.7	3.7	4.3	5	7.86618	7.71242	7.3406	7.69536	7.45794	7.31977	7.9539	7.80132	7.42557	8.00843
6585	Q9UGR2;Q9UGR2-2	Zinc finger CCCH domain-containing protein 7B	ZC3H7B	0.384242	0.143867	-0.240375	no	no	1.1521e-93	2093600000	15	15	11	13	9	13	11	12	11	13	9	13	11	12	19.4	111.58	993	19	26	18	28	24	19	15.2	17.6	12.7	17.3	14.8	15.9	8.38543	8.20629	7.91433	8.63009	8.3846	8.26536	8.64472	8.48657	8.12934	8.45249
6093	Q9H2M9;Q9H2M9-2;F8WDJ2	Rab3 GTPase-activating protein non-catalytic subunit	RAB3GAP2	0.384072	-0.0673633	-0.451435	no	no	3.8265e-201	3744300000	22	22	16	18	14	16	17	13	16	18	14	16	17	13	21	155.98	1393	25	33	21	23	30	23	15.4	16.4	12.4	15.8	15.7	12.3	8.75189	8.53915	8.33993	8.89359	8.65987	8.51287	8.72655	8.53732	8.27457	8.64877
4279	Q14112-2;Q14112;E7EPP3;H0Y3N6;H0YJV3	Nidogen-2	NID2	0.382456	-2.19535	-2.5778	no	no	4.7632e-240	3337700000	18	17	10	12	12	11	15	12	9	11	11	10	14	11	24.3	140.86	1274	19	20	23	16	22	19	14.4	16.2	15.8	14.1	20	15	8.63111	8.02325	8.50809	8.78326	8.11103	8.67939	8.84746	8.2824	8.70944	8.59965
994	C9JMG9;E9PG60;Q6DN90;Q6DN90-2	IQ motif and SEC7 domain-containing protein 1	IQSEC1	0.381793	0.0804399	-0.301353	no	no	0.0019415	17119000	1	1	0	1	1	1	1	0	0	1	1	1	1	0	0.8	128.32	1160	0	2	2	2	3	0	0	0.8	0.8	0.8	0.8	0	NaN	NaN	NaN	6.71361	6.51514	6.27807	6.61499	6.38077	6.23495	6.54919
278	Q7L3B6;B1AL69	Hsp90 co-chaperone Cdc37-like 1	CDC37L1	0.381561	0.194427	-0.187134	no	no	5.0952e-18	105760000	2	2	2	2	1	2	2	2	2	2	1	2	2	2	8.9	38.834	337	2	4	2	4	2	3	8.9	8.9	4.5	8.9	8.9	8.9	7.21024	6.8998	6.9184	7.36371	7.13612	6.97423	6.96572	6.79508	6.4775	7.31792
4215	Q13418;B7Z1I0;B7Z418;E9PNR4;E9PM54	Integrin-linked protein kinase	ILK	0.381283	0.498648	0.117365	no	no	8.2299e-148	21323000000	18	18	16	17	15	15	15	18	16	17	15	15	15	18	45.6	51.419	452	54	53	50	52	58	56	42	43.4	40.5	38.3	39.8	45.6	9.50018	9.35951	8.94217	9.55841	9.35966	9.12333	9.57538	9.43172	9.0251	9.53679
1503	Q71RC2-4;Q71RC2;G5E976;E9PDG5;Q71RC2-3;G3XAA8;Q96J85;Q6P4E2;Q71RC2-2;F8VY40;Q8TBL5;F8W1Z5;F8W1I4	La-related protein 4	LARP4	0.380038	0.630855	0.250818	no	no	1.1764e-21	338490000	3	3	2	2	1	2	3	3	2	2	1	2	3	3	5.5	81.243	730	3	2	1	2	4	4	3.3	4	2.2	4	5.5	5.5	7.23837	7.10298	6.66625	7.63228	7.46759	7.13139	7.59687	7.42674	7.10758	7.68959
6010	Q9C037;Q9C037-2;Q9C037-3	Tripartite motif-containing protein 4	TRIM4	0.378747	0.00646323	-0.372283	no	no	5.7058e-24	233290000	4	2	2	3	3	4	4	4	1	1	1	2	2	2	12.4	57.46	500	3	2	3	3	4	3	7.2	9.4	9.4	12.4	12.4	12.4	7.31836	7.13402	6.85727	7.09482	6.87721	6.69043	7.50584	7.31829	7.05073	7.6104
3564	P48060;F6VVE8;B4E3S5	Glioma pathogenesis-related protein 1	GLIPR1	0.378727	0.823422	0.444694	no	no	2.8038e-25	1204300000	5	5	4	4	2	5	4	4	4	4	2	5	4	4	34.6	30.366	266	9	10	4	12	10	7	29.3	29.3	14.7	34.6	29.3	23.7	8.38956	8.26195	7.79539	8.42802	8.27593	7.89854	8.28472	8.17537	7.63232	8.20197
6928	Q9Y5X9;Q9Y5X9-2;B4DTR8	Endothelial lipase	LIPG	0.378706	-0.114633	-0.49334	no	no	2.9855e-23	737000000	5	5	2	1	4	3	2	2	2	1	4	3	2	2	15.4	56.794	500	5	3	5	5	4	3	4.8	3.4	14	8.6	4.8	7.2	8.02412	7.81948	7.59901	7.8171	7.59465	7.42005	8.30792	8.14882	7.79469	8.18602
2670	O75808;C9J194;O75808-2	Calpain-15	SOLH	0.378124	0.302386	-0.0757379	no	no	1.7988e-21	142400000	3	3	2	2	2	2	1	2	2	2	2	2	1	2	3.7	117.31	1086	3	3	3	3	2	3	2.9	2.9	2.9	3	2.2	3	7.17566	6.93763	6.80087	7.34633	7.03117	7.05896	7.45859	7.27012	7.00522	7.63734
5345	Q8TED9;Q8TED9-2;Q8TED9-3;Q8TED9-4	Actin filament-associated protein 1-like 1	AFAP1L1	0.374198	-1.448	-1.8222	no	no	1.0767e-16	460410000	5	5	2	2	2	3	4	3	2	2	2	3	4	3	8.7	86.431	768	4	5	5	6	9	8	2.2	2.2	2.2	4	6.9	6	7.52896	7.18384	7.26795	7.63525	7.14417	7.46596	7.7064	7.29649	7.49236	7.87584
4698	Q5TC82-2;Q5TC82	Roquin	RC3H1	0.372884	-0.19464	-0.567524	no	no	9.9074e-19	108390000	4	4	2	1	2	2	2	1	2	1	2	2	2	1	8.6	124.84	1125	2	1	2	3	2	1	4.4	1.5	4.3	4.9	4.9	2.2	7.3264	7.1351	6.87818	7.20693	6.9118	6.89993	7.24851	7.05808	6.79877	7.0766
6506	Q9P253;H0YLM6;H0YMC9	Vacuolar protein sorting-associated protein 18 homolog	VPS18	0.372557	0.0808352	-0.291721	no	no	1.0083e-162	2860700000	15	15	9	9	7	7	11	11	9	9	7	7	11	11	24.6	110.18	973	17	18	16	15	23	17	14.1	16.9	10.1	10.8	18.1	18.9	8.59601	8.4004	8.15549	8.58879	8.3323	8.23812	8.76323	8.58185	8.29653	8.44902
3073	P13797;B7Z6M1;B4DGB4;F8W8D8;B4DI60;P13796;Q5TBN3;F2Z2Z9	Plastin-3	PLS3	0.372255	-0.254231	-0.626486	no	no	0	91586000000	39	36	34	37	38	35	33	35	31	34	35	32	30	32	61.1	70.81	630	168	183	171	163	152	162	56.3	60	60	57.5	56.2	58.6	10.1534	9.93906	9.744	10.2434	9.961	9.92281	10.2126	9.9988	9.80217	10.1564
1273	E7ENX8;E7EUZ6;F8VX49;E7EQ98;E7ESQ3;Q5HY71;Q03519;B0V2J7;Q03519-2;E7EMI1;H0YC90	Antigen peptide transporter 2	TAP2	0.372248	-0.0497701	-0.422018	no	no	5.9639e-30	624440000	5	5	3	3	2	3	4	4	3	3	2	3	4	4	7.9	92.998	843	3	4	2	3	4	4	4.3	5.6	3.4	5.3	6.4	6.9	7.57785	7.33282	7.21251	8.16056	7.83405	7.8836	7.58948	7.41441	7.11032	7.90985
4876	Q6ZMP0;B4DR13;Q6ZMP0-2	Thrombospondin type-1 domain-containing protein 4	THSD4	0.371846	0.302831	-0.0690147	no	no	5.7565e-19	348030000	7	7	3	4	7	2	4	4	3	4	7	2	4	4	6.6	112.45	1018	5	4	7	2	5	4	3.7	4.4	6.6	2.2	4	4.3	7.55383	7.36864	7.0944	7.37883	7.20241	6.90239	8.20112	7.97036	7.81623	7.58226
1956	F8VWT9;Q9Y4D8;Q9Y4D8-4;Q9Y4D8-2;Q9Y4D8-3;H0YIL8	Probable E3 ubiquitin-protein ligase C12orf51	C12orf51	0.36977	0.18061	-0.18916	no	no	1.2805e-29	300380000	7	7	3	4	3	4	4	3	3	4	3	4	4	3	2.3	468.65	4272	7	7	6	7	6	6	1.2	1.1	1.2	1.3	1.4	1.1	7.32693	7.13226	6.88474	7.26312	6.99868	6.9221	7.38844	7.21622	6.90345	7.95358
5252	Q8NDZ4;B7Z1W3;C9JY09;E7ET39	Deleted in autism protein 1	C3orf58	0.36915	-0.354452	-0.723602	no	no	6.3357e-57	1512600000	6	6	4	6	5	5	5	5	4	6	5	5	5	5	23.3	49.481	430	9	14	12	11	14	13	13	23.3	21.4	19.5	16.7	16.7	8.16708	7.93973	7.7773	8.45261	8.12395	8.17759	8.483	8.29197	8.03431	8.3759
5816	Q99988	Growth/differentiation factor 15	GDF15	0.366531	0.893357	0.526826	no	no	1.7976e-81	7029900000	11	11	10	10	11	9	10	8	10	10	11	9	10	8	45.5	34.14	308	14	16	17	15	14	12	35.1	43.8	45.5	33.4	35.1	37.7	9.01916	8.84687	8.53432	9.13226	8.9797	8.60384	9.12639	9.01528	8.47996	9.00415
1692	O00750;F5GWN5;E9PGR6	Phosphatidylinositol 4-phosphate 3-kinase C2 domain-containing subunit beta	PIK3C2B	0.366453	-0.33895	-0.705403	no	no	6.0421e-09	30568000	3	3	1	1	2	2	1	1	1	1	2	2	1	1	2.9	184.77	1634	2	1	2	4	3	2	0.6	0.6	1.6	1.9	0.6	0.6	6.17603	5.9458	5.79039	4.92809	4.56543	4.68102	6.65568	6.34661	6.36254	7.32331
6619	Q9UID3;Q9UID3-2;E9PKX7;E9PJ36;E9PRV0;H0YEE1;E9PQN6;E9PQD5;E9PMB6;H0YCB7	Protein fat-free homolog	FFR	0.365026	0.0011257	-0.3639	no	no	1.228e-21	606950000	4	4	2	4	2	2	2	2	2	4	2	2	2	2	6	86.041	782	4	5	3	2	2	3	3.5	6	3.5	3.2	3.5	3.2	7.96509	7.77781	7.50954	8.3364	8.0693	7.99853	7.88991	7.70737	7.4254	7.69498
346	Q5W125;Q9NWW6;B3KUG3;Q9NWW6-2	Nicotinamide riboside kinase 1	C9orf95;NMRK1	0.364451	0.0873177	-0.277133	no	no	2.0482e-13	315640000	2	2	2	1	2	1	1	2	2	1	2	1	1	2	16.3	23.797	203	2	1	2	2	1	3	16.3	10.3	16.3	10.3	10.3	16.3	7.82539	7.6589	7.3284	7.21426	6.96716	6.85165	7.97116	7.80044	7.48306	7.65982
6225	Q9HCM2;A4D1N6;Q9HCM2-3;Q9HCM2-2;Q9HCM2-4	Plexin-A4	PLXNA4	0.363768	-0.024036	-0.387804	no	no	1.307e-27	1123000000	7	4	4	5	7	4	4	4	1	2	4	1	1	1	4.4	212.45	1894	4	3	5	2	3	2	2.2	3.1	4.4	2.2	2.2	2.2	8.40958	8.25957	7.87509	8.51617	8.33339	8.05212	8.33023	8.10887	7.93155	6.99179
4981	Q86SQ0;Q86SQ0-3;Q86SQ0-2;E9PFQ4;G8JLD7;E9PGF6;E7EVJ9;G5E9V3;E9PDY7	Pleckstrin homology-like domain family B member 2	PHLDB2	0.363094	0.495735	0.132641	no	no	5.9552e-113	1806600000	14	14	11	8	8	9	10	7	11	8	8	9	10	7	15.2	142.16	1253	23	16	20	19	22	17	12.8	9.2	8.7	10	10.9	7.7	8.49664	8.33578	7.98735	8.32044	8.1174	7.89268	8.51784	8.37981	7.95286	8.50222
338	P57737;P57737-2;B3KSY4;E7EP81	Coronin-7	CORO7	0.361547	-0.542803	-0.904349	no	no	4.9018e-115	2642600000	14	14	8	8	7	8	8	8	8	8	7	8	8	8	22.3	100.6	925	9	11	8	9	9	12	13.7	12.6	11.2	12.6	12.8	15.4	8.78737	8.58051	8.36594	8.63363	8.24571	8.40497	8.40322	8.15269	8.04505	8.64654
2397	O15031;E7EQZ5;E2PU09;A6QRG9;F5H0C9;A6QRH1	Plexin-B2	PLXNB2	0.361522	0.49072	0.129197	no	no	4.5757e-131	1563700000	11	11	8	9	10	7	9	10	8	9	10	7	9	10	9.1	205.12	1838	24	20	22	19	19	24	6.5	7.5	8.4	6.2	7.8	8.2	8.47217	8.3043	7.97815	8.35071	8.14242	7.93158	8.53822	8.37802	8.02747	8.17679
5687	Q96N67;Q96N67-6;Q96N67-2;Q96N67-5;Q96N67-3;Q96N67-4;H0Y7L2;F8W9H6;Q96NI0	Dedicator of cytokinesis protein 7	DOCK7	0.361097	0.319153	-0.0419438	no	no	1.6549e-189	1599900000	22	18	14	15	12	14	16	14	10	11	9	10	13	11	13.9	242.56	2140	19	22	18	21	24	21	8.2	9	7.5	8.4	9.6	8.2	8.33276	8.13399	7.89772	8.37011	8.13723	7.98817	8.33594	8.17574	7.82516	8.49434
5540	Q96BY7	Autophagy-related protein 2 homolog B	ATG2B	0.360812	0.188069	-0.172744	no	no	8.9581e-20	300350000	4	4	3	2	2	2	1	2	3	2	2	2	1	2	3	232.76	2078	6	5	2	4	4	4	1.8	2.4	2.4	2.4	1.2	2.4	7.92866	7.82316	7.26243	7.61161	7.33991	7.27912	7.42925	7.29026	6.86681	7.7496
5549	Q96CC6;F5GWL4;E9PGJ1;H0Y6L9;Q4TT58;F8WBS4;A2IDA2	Inactive rhomboid protein 1	RHBDF1	0.360525	0.191755	-0.16877	no	no	9.6548e-50	498270000	4	4	2	3	2	2	3	4	2	3	2	2	3	4	9.5	97.4	855	2	4	3	2	3	5	4.8	5.7	4.8	4.8	5.7	9.5	7.61803	7.44902	7.12639	7.86355	7.62654	7.48742	8.02735	7.83497	7.5811	7.82774
2212	Q7Z6J0;Q7Z6J0-3;H0YA90	E3 ubiquitin-protein ligase SH3RF1	SH3RF1	0.359736	0.0852058	-0.27453	no	no	9.0086e-10	224560000	3	3	3	2	3	3	3	1	3	2	3	3	3	1	3.9	93.128	888	5	7	5	5	7	3	3.9	3	3.9	3.9	3.9	1.5	7.57555	7.35551	7.17487	7.55964	7.25761	7.25964	7.58304	7.35585	7.19299	7.59956
1948	Q8N4A0;F8VUJ3;B4DMX6	Polypeptide N-acetylgalactosaminyltransferase 4	GALNT4;POC1B-GALNT4	0.359117	0.735644	0.376526	no	no	1.1208e-37	649910000	5	4	3	4	4	4	4	4	2	3	3	3	3	3	9.5	66.665	578	6	9	8	9	6	7	5.4	6.6	6.6	6.6	6.6	6.9	8.01081	7.88454	7.41268	7.89998	7.75313	7.35771	8.24316	8.13354	7.59157	8.02649
1980	O00423-3;O00423;F8W717;G3V3N9;G3V500;H0YJY3;H0YJK4;H0YJD8	Echinoderm microtubule-associated protein-like 1	EML1	0.358624	-0.32987	-0.688494	no	no	6.2413e-44	682100000	10	9	6	8	7	5	4	6	5	7	6	5	4	5	13.9	91.984	834	11	11	12	9	6	8	8.2	10.9	9.5	6.7	5.4	7.8	7.7639	7.50433	7.41702	8.21349	7.8914	7.93254	8.29979	8.06221	7.92446	7.96231
4642	Q5NDL2;Q5NDL2-3;A8K2U1;B4E243;Q5NDL2-2;F5H225;C9JQM7;C9J4G5	EGF domain-specific O-linked N-acetylglucosamine transferase	EOGT	0.358551	0.314087	-0.044464	no	no	1.7468e-47	5240500000	11	11	8	10	8	10	9	7	8	10	8	10	9	7	21.8	62.01	527	18	22	20	21	19	15	16.5	19.4	16.5	21.4	16.9	14.8	8.86785	8.70586	8.36107	9.05576	8.82172	8.6755	8.89972	8.74362	8.37961	8.87711
4226	Q13459;Q13459-2;B7WP69;B2RTY4-3	Unconventional myosin-IXb	MYO9B	0.357682	0.0186588	-0.339023	no	no	3.792e-207	7160900000	23	21	14	17	16	16	17	18	13	17	16	16	16	18	17.7	243.4	2157	44	45	38	45	45	46	11.1	12.5	12.4	12.5	11.6	13.7	9.01153	8.82283	8.55861	9.08785	8.81434	8.75746	9.08842	8.91114	8.61366	9.05427
2352	O14617-5;O14617;G5E988;O14617-2;O14617-4;E7EMM2;O14617-3	AP-3 complex subunit delta-1	AP3D1	0.356862	0.26479	-0.092072	no	no	1.6754e-301	8816900000	24	24	20	20	21	16	21	19	20	20	21	16	21	19	26	136.65	1215	59	66	62	47	64	58	22.7	22.2	23.6	17	22.7	21.2	9.02776	8.85572	8.54241	9.2402	8.98165	8.89206	9.28598	9.09209	8.84243	8.94091
483	P17302;B4DN50	Gap junction alpha-1 protein;Gap junction protein	GJA1	0.356521	0.315558	-0.0409626	no	no	2.8399e-99	3346900000	12	12	7	7	9	7	8	9	7	7	9	7	8	9	36.6	43.008	382	32	31	26	31	29	30	25.1	20.4	27.2	20.4	27.5	22.8	8.73031	8.5642	8.23249	8.72451	8.46948	8.37203	8.77764	8.60699	8.28943	8.62672
6128	Q9H553;Q9H553-2	Alpha-1,3/1,6-mannosyltransferase ALG2	ALG2	0.352746	0.396555	0.0438095	no	no	3.0337e-63	1172200000	10	10	7	6	7	6	6	4	7	6	7	6	6	4	32	47.091	416	18	18	13	16	15	12	28.4	18.8	20.4	23.1	20.4	13.2	8.40741	8.2404	7.91153	8.28648	8.07276	7.87603	8.32911	8.17725	7.79907	8.17441
3683	P51813	Cytoplasmic tyrosine-protein kinase BMX	BMX	0.35253	0.0772847	-0.275245	no	no	2.9657e-138	6559900000	22	22	17	15	16	15	16	18	17	15	16	15	16	18	35.7	78.01	675	44	40	41	38	47	46	29.3	26.5	27.9	25.8	26.8	29.3	9.01187	8.78754	8.61761	8.96694	8.70043	8.62841	9.0381	8.82643	8.62442	8.99042
2456	O43150;O43150-2	Arf-GAP with SH3 domain, ANK repeat and PH domain-containing protein 2	ASAP2	0.351439	-0.339023	-0.690462	no	no	8.3671e-61	727090000	9	7	7	7	6	6	6	6	5	5	4	4	4	5	17.7	111.65	1006	8	8	6	4	4	8	14.5	11.6	12.1	12.1	11.5	13.2	8.0249	7.73446	7.71302	8.1358	7.78779	7.87715	8.09799	7.89291	7.67363	7.79462
3021	P10646;C9JBB3;P10646-2;C9JKV3;C9JQ14;C9JT76	Tissue factor pathway inhibitor	TFPI	0.351285	1.15274	0.801456	no	no	2.662e-41	1163400000	6	6	5	3	4	5	5	5	5	3	4	5	5	5	27.3	35.015	304	9	5	10	13	11	12	24.3	12.8	18.1	21.1	24.3	21.1	8.2865	8.18147	7.61854	8.17984	8.04364	7.60993	8.31973	8.21958	7.63347	8.09117
409	Q8NEZ3;F5H2P4;B4DGR6	WD repeat-containing protein 19	WDR19	0.349567	-0.167101	-0.516667	no	no	2.222e-09	106310000	4	4	3	2	2	3	2	1	3	2	2	3	2	1	4.8	151.58	1342	3	2	2	3	2	1	3.7	2.9	2.9	3.9	2.9	1.6	7.42504	7.29172	6.84717	7.14098	6.64389	6.97453	7.26496	7.02666	6.89056	7.47689
1402	Q14766-4;Q14766;Q14766-5;Q14766-2;E7EV71;Q14766-3;C9JD84;E7EWM0;E7EUU6	Latent-transforming growth factor beta-binding protein 1	LTBP1	0.348898	0.715699	0.366801	no	no	1.3783e-87	2992500000	11	11	5	9	10	6	7	6	5	9	10	6	7	6	9.3	186.87	1722	17	19	19	17	15	15	4	7.8	8.6	6	7.1	4.9	8.70709	8.57591	8.12323	8.68031	8.51853	8.17307	8.87401	8.74765	8.27616	8.64219
4975	Q7Z7H5;Q7Z7H5-3;C9JUN6;Q7Z7H5-2;F8W7F7	Transmembrane emp24 domain-containing protein 4	TMED4	0.34884	0.0799214	-0.268919	no	no	8.8421e-27	396480000	5	4	4	3	1	2	3	4	3	2	0	1	2	3	29.5	25.943	227	3	3	0	0	2	4	26	21.1	7.5	11.5	21.1	24.7	7.88235	7.69733	7.42256	7.81524	7.58202	7.43382	NaN	NaN	NaN	NaN
1376	Q7KZI7;E9PC69;Q7KZI7-8;Q7KZI7-11;Q7KZI7-6;Q7KZI7-3;Q7KZI7-14;Q7KZI7-12;Q7KZI7-9;Q7KZI7-4;Q7KZI7-16;Q7KZI7-5;Q7KZI7-15;Q7KZI7-2;E7ETY4;Q7KZI7-7;Q7KZI7-13;Q7KZI7-10;F5H4F6;F5H6N2;Q9P0L2-3;Q9P0L2-2;O75271	Serine/threonine-protein kinase MARK2	MARK2	0.348631	0.151394	-0.197236	no	no	8.0193e-23	754080000	6	4	3	2	2	4	3	3	1	2	1	3	2	2	10	87.91	788	2	4	2	4	3	4	6.1	4.9	4.3	7.1	5.5	6.1	7.68912	7.52282	7.19176	7.87979	7.62466	7.52742	8.1707	7.99018	7.70226	8.43151
4130	Q12778;A6NCE0;A8MYZ6;P98177;P98177-2	Forkhead box protein O1	FOXO1	0.348585	-0.0835198	-0.432104	no	no	1.7553e-31	460260000	5	5	4	5	2	4	3	3	4	5	2	4	3	3	13.3	69.661	655	7	7	3	5	5	5	9.2	13.3	4	11.5	7.3	7.3	7.88681	7.63943	7.52455	7.90801	7.61311	7.60077	7.81346	7.59996	7.40269	7.95184
6751	Q9UPU7;Q9UPU7-2;Q9UPU7-3;C9JW56	TBC1 domain family member 2B	TBC1D2B	0.348403	-0.186754	-0.535157	no	no	6.8502e-19	309120000	6	6	4	6	5	4	4	5	4	6	5	4	4	5	6.7	109.88	963	7	7	7	9	8	9	4.3	6.7	5.8	4.3	4.9	5.8	7.54167	7.28526	7.19089	7.69163	7.31561	7.45452	7.44731	7.26257	6.98699	7.86132
2693	O76024;H0Y9G5;B4DJ99	Wolframin	WFS1	0.346579	0.408512	0.0619326	no	no	1.1871e-81	2191600000	11	11	8	9	11	8	9	11	8	9	11	8	9	11	14.4	100.29	890	13	16	19	14	13	18	12.7	9.6	14.4	11.8	13.5	14.4	8.47996	8.29484	8.02036	8.54565	8.34635	8.11153	8.65583	8.48538	8.1672	8.53696
3418	P35573;P35573-3;P35573-2	Glycogen debranching enzyme;4-alpha-glucanotransferase;Amylo-alpha-1,6-glucosidase	AGL	0.345825	-0.413161	-0.758985	no	no	9.2603e-138	4312800000	19	19	9	13	11	11	13	14	9	13	11	11	13	14	17	174.76	1532	18	25	17	19	22	20	9.7	11.6	10.6	10.6	12.9	12.7	8.63158	8.41098	8.23178	8.89257	8.6287	8.5509	8.83501	8.63286	8.40572	8.96137
3238	P23381;P23381-2;G3V3Y5;G3V3H8;G3V277;G3V456;G3V5U1;G3V423;G3V227;G3V3P2;H0YJP3;G3V2Y7;G3V3X0;G3V3S7;G3V5W1;G3V4N8;G3V4C7;G3V2C0;G3V339;G3V313;G3V4S4;G3V4N0;G3V3R3;G3V2F2;G3V4Q0;G3V4A3;P78534;G3V5H5	Tryptophan--tRNA ligase, cytoplasmic;T1-TrpRS;T2-TrpRS	WARS	0.345304	0.30743	-0.0378742	no	no	0	38416000000	35	35	29	34	29	30	31	29	29	34	29	30	31	29	78.3	53.165	471	112	132	123	109	115	118	73.5	76.9	71.8	72.2	72.2	73.5	9.7313	9.56525	9.23338	9.86177	9.6461	9.45439	9.7964	9.63275	9.29327	9.77741
1810	F5H2R7;Q9NQC7;Q9NQC7-2	Ubiquitin carboxyl-terminal hydrolase CYLD	CYLD	0.345036	0.0607583	-0.284277	no	no	1.431e-11	497310000	3	3	3	3	2	3	3	3	3	3	2	3	3	3	4.2	107.3	956	8	7	6	6	10	6	4.2	4.2	2.5	4.2	4.2	4.2	7.94066	7.76008	7.47236	7.90503	7.64523	7.55844	7.89123	7.67059	7.49147	7.9152
283	O95490-6;O95490-7;O95490;B1ALU3;O95490-5;O95490-2;E9PEC7;B1ALU1;E7ERX4;H0Y5C0;O95490-4;A8MW65;O95490-3;H0Y3V3	Latrophilin-2	LPHN2	0.343996	-0.0574155	-0.401412	no	no	1.4286e-74	300750000	5	5	4	4	3	2	4	3	4	4	3	2	4	3	6	165.06	1474	5	5	3	2	4	5	5.4	4.8	4.2	2.9	5.4	4.2	7.75347	7.56934	7.29199	7.58137	7.36999	7.1672	7.81152	7.59598	7.40394	7.38807
4034	Q02040;Q02040-3;Q02040-2	A-kinase anchor protein 17A	AKAP17A	0.34374	-0.141171	-0.484911	no	no	6.0384e-13	416530000	4	4	3	2	2	2	3	3	3	2	2	2	3	3	4.7	80.735	695	4	3	2	2	4	3	3.6	2.4	2.4	2.4	3.6	3.6	7.73465	7.55075	7.27272	7.83913	7.55769	7.51758	7.68966	7.51957	7.2003	7.83758
2399	O15042;O15042-2;E7ET15;O15042-3;C9JB80;H0Y8D9;E7EW00;C9J5L1;C9JDJ7	U2 snRNP-associated SURP motif-containing protein	U2SURP	0.343469	0.0620379	-0.281431	no	no	5.5772e-230	4908300000	23	23	16	20	15	16	19	20	16	20	15	16	19	20	27	118.29	1029	33	44	38	32	39	42	17.9	24.4	14.6	19	22.5	24.5	8.78287	8.58113	8.3529	8.94486	8.68976	8.59247	8.79908	8.60104	8.3628	8.83743
6720	Q9UNF1;Q9UNF1-2;Q5H909;Q5H907;E7ESB0	Melanoma-associated antigen D2	MAGED2	0.343416	0.281018	-0.062398	no	no	1.1247e-77	4198500000	18	16	11	15	13	11	15	14	9	13	11	9	13	12	32.7	64.953	606	26	28	24	29	28	23	17	24.6	24.8	20.5	29	21.6	8.79337	8.63259	8.28393	8.77308	8.54742	8.38081	8.89343	8.72612	8.39818	8.93433
6879	Q9Y4D1;Q9Y4D1-2;Q9Y4D1-3	Disheveled-associated activator of morphogenesis 1	DAAM1	0.342002	0.26873	-0.0732718	no	no	2.845e-49	478320000	6	6	3	5	3	3	5	6	3	5	3	3	5	6	8.8	123.47	1078	4	9	4	5	8	10	3.9	8	5.2	4.8	8	8.8	7.39522	7.18144	6.98492	7.97866	7.69016	7.66472	7.88592	7.70571	7.41692	7.61222
5697	Q96PE2	Rho guanine nucleotide exchange factor 17	ARHGEF17	0.341809	-0.599222	-0.941031	no	no	2.9426e-104	669840000	8	8	5	5	4	4	5	6	5	5	4	4	5	6	6.8	221.67	2063	8	10	6	7	8	6	4.6	5.2	3.7	4	5.2	4.9	8.02751	7.78025	7.66506	8.26152	7.97296	7.94767	7.97621	7.70687	7.641	7.90995
6202	Q9HAZ1;B7ZL31;E7ES88	Dual specificity protein kinase CLK4	CLK4	0.341526	0.124047	-0.217479	no	no	2.7982e-45	126860000	4	3	2	2	2	2	3	2	2	2	2	2	2	2	14.6	57.491	481	3	3	3	2	3	2	6.9	6.9	6.9	6.9	11.2	6.7	7.34274	7.15936	6.87984	7.34023	7.07602	6.99892	7.29724	7.12613	6.81	7.46561
6027	Q9GZM7;B4DPK6;B4DVG5;Q9GZM7-2;E7EUP2;B4DNS5	Tubulointerstitial nephritis antigen-like	TINAGL1	0.340967	0.145494	-0.195474	no	no	1.7343e-188	8994600000	17	17	16	16	14	14	15	15	16	16	14	14	15	15	61.7	52.387	467	31	34	35	34	36	33	57	60.2	52	50.5	53.5	55.2	9.20989	9.03399	8.73233	9.14461	8.90866	8.76701	9.18837	9.031	8.67118	9.1623
4299	Q14195-2;Q14195;F5GWI3;H0YBT4;Q14194-2;Q14194;E9PD68;D6RF19;H0YB87;Q14117	Dihydropyrimidinase-related protein 3	DPYSL3	0.340375	0.485741	0.145366	no	no	0	58544000000	38	35	33	32	33	36	35	34	30	29	30	33	32	31	72.2	73.91	684	150	141	141	139	145	138	60.8	62.1	63.6	70.2	65.6	62.1	9.96983	9.82244	9.42888	9.9502	9.75172	9.51468	10.035	9.88717	9.49507	9.88967
4765	Q68CZ2;Q59GW4;E9PCX8;E7ERH3;Q68CZ2-2;C9JHU5;F5GXX8;Q68CZ2-3;Q68CZ2-4;C9JTD0;C9JWN9	Tensin-3	TNS3	0.33838	-0.979618	-1.318	no	no	7.7142e-72	166530000	6	5	2	3	3	3	4	3	1	2	2	2	3	3	9.9	155.26	1445	1	2	2	2	3	2	2.3	3.9	5.1	3.9	5.4	4.5	6.90099	6.54108	6.6518	7.62027	7.08828	7.46922	7.25237	6.91403	6.9857	7.71562
3132	P16885	1-phosphatidylinositol 4,5-bisphosphate phosphodiesterase gamma-2	PLCG2	0.338216	-1.29707	-1.63529	no	no	3.8772e-114	564340000	10	10	7	7	6	7	7	6	7	7	6	7	7	6	13.3	147.87	1265	10	14	10	11	10	9	9.4	9.4	9.1	9.3	8.8	8.8	7.82321	7.45883	7.57745	7.98049	7.5033	7.80443	7.98868	7.67076	7.70392	8.00475
3727	P53621;P53621-2	Coatomer subunit alpha;Xenin;Proxenin	COPA	0.338171	-0.0149266	-0.353098	no	no	0	83475000000	68	68	52	55	59	52	56	59	52	55	59	52	56	59	62	138.34	1224	177	193	194	173	197	192	50.2	53.7	54.4	48	53.3	55.8	10.0759	9.89367	9.6107	10.1322	9.87909	9.77719	10.1558	9.98684	9.66406	10.084
5031	Q86WV6	Transmembrane protein 173	TMEM173	0.338061	-0.398241	-0.736302	no	no	1.9821e-66	1845100000	6	6	6	6	6	5	5	4	6	6	6	5	5	4	22.4	42.192	379	9	13	11	7	11	7	22.4	22.4	22.4	20.3	20.3	17.4	8.51036	8.28547	8.11697	8.60467	8.30196	8.30533	8.64297	8.43395	8.22502	8.06744
5028	Q86WG5;Q86WG5-3;H0YD05	Myotubularin-related protein 13	SBF2	0.337817	-0.523662	-0.861479	no	no	4.7093e-20	212800000	4	3	3	4	3	3	3	3	2	3	2	2	2	2	3.1	208.46	1849	6	4	4	5	5	5	2.4	3.1	2.4	2.4	2.4	2.4	7.62387	7.35668	7.28614	7.488	7.12555	7.24077	7.5218	7.31929	7.09314	7.57973
5063	Q8IV08;B4DEL6;E2QRG1;E2QRD3	Phospholipase D3	PLD3	0.337608	-0.481816	-0.819423	no	no	4.4497e-95	5171400000	11	11	10	9	10	9	11	9	10	9	10	9	11	9	28.6	54.705	490	11	12	14	16	14	11	26.5	24.9	25.7	23.7	28.6	21.2	8.82749	8.56441	8.48485	8.96295	8.65107	8.6725	8.92444	8.65269	8.59203	9.02661
2405	O15084-1;O15084-4;O15084;O15084-2;B4DIW9;C9JBB9	Serine/threonine-protein phosphatase 6 regulatory ankyrin repeat subunit A	ANKRD28	0.337414	-0.0663991	-0.403813	no	no	9.2708e-26	358180000	5	5	2	2	2	3	3	3	2	2	2	3	3	3	6.6	116.54	1086	2	2	2	3	3	3	2.3	2.3	2.6	3.7	4.1	3.8	7.60166	7.43796	7.09861	7.61153	7.30287	7.31802	7.69699	7.41929	7.37129	7.845
4114	Q0IIM8;B9A6K6;Q0IIM8-2;D6RFZ2;H0Y552;Q5JSK2	TBC1 domain family member 8B	TBC1D8B	0.33717	-0.872159	-1.20933	no	no	4.9036e-24	205530000	4	4	2	2	2	3	4	2	2	2	2	3	4	2	5.3	128.71	1120	6	3	3	4	5	3	2.9	2.9	2.9	4.6	5.3	2.9	7.6651	7.35887	7.3692	7.28353	6.91077	7.04407	7.53298	7.2351	7.22879	7.56796
5111	Q8IY17;Q8IY17-3;Q8IY17-2;F5H5K9;F5H1D5	Neuropathy target esterase	PNPLA6	0.336542	0.274006	-0.0625362	no	no	1.2125e-101	2241500000	18	17	11	10	11	7	10	10	11	10	11	7	10	9	18.9	149.99	1366	26	27	26	25	26	23	11.1	11.8	10.8	5.9	8.5	8.7	8.47047	8.27905	8.02247	8.60529	8.39358	8.1917	8.63195	8.47821	8.10636	8.56266
671	Q96DZ1;B5MC72;Q96DZ1-2	Endoplasmic reticulum lectin 1	ERLEC1	0.335852	0.457574	0.121722	no	no	2.7457e-75	2966900000	14	14	11	10	11	8	8	8	11	10	11	8	8	8	46.6	54.858	483	29	26	24	22	20	21	38.5	31.9	37.9	28.6	28.4	27.1	8.7377	8.58282	8.21476	8.76585	8.62219	8.21556	8.74536	8.57174	8.26323	8.61114
4920	Q7L576;E7EQ04;Q7L576-2;Q7L576-3;A8MUM2;E7EW33;H0YL50;H0YL39;H0YLJ5;H0YN93;E5RFQ0;H0YNP0;E5RJW3	Cytoplasmic FMR1-interacting protein 1	CYFIP1	0.335485	-0.238665	-0.57415	no	no	0	14562000000	41	25	32	36	34	36	34	34	18	23	20	20	21	20	32.8	145.18	1253	61	72	66	69	71	67	27.8	29.3	28.5	30.6	27.9	27.9	9.3112	9.09283	8.90798	9.38986	9.09191	9.08572	9.35199	9.13107	8.95265	9.30707
448	Q5H8A4;Q5H8A4-2;E7EWV1;D6RFE8;E7EM50;Q5H8A4-4;B4DKC7;Q5H8A4-3;Q5H8A4-5;D6R9J9	GPI ethanolamine phosphate transferase 2	PIGG	0.335357	0.458446	0.123088	no	no	9.2735e-19	722190000	2	2	2	2	2	2	2	2	2	2	2	2	2	2	3.1	108.17	983	6	6	7	6	7	7	3.1	3.1	3.1	3.1	3.1	3.1	7.99405	7.85818	7.42323	7.92499	7.71151	7.51419	8.19056	8.03415	7.67117	7.96997
4051	Q03111	Protein ENL	MLLT1	0.335225	0.404344	0.0691188	no	no	1.1142e-10	75715000	2	2	2	2	2	2	2	2	2	2	2	2	2	2	5	62.055	559	2	3	2	4	2	4	5	5	5	5	5	5	7.01389	6.88649	6.41906	7.03165	6.7815	6.67297	7.12441	6.9346	6.67347	7.04497
4887	Q6ZUT6;Q6ZUT6-4;Q6ZUT6-2;Q6ZUT6-3;H0YM82	Uncharacterized protein C15orf52	C15orf52	0.335152	-0.778881	-1.11403	no	no	2.4316e-30	501750000	2	2	2	2	2	1	2	2	2	2	2	1	2	2	5.8	57.324	534	5	5	4	4	6	6	5.8	5.8	5.8	3.7	5.8	5.8	7.09391	6.81279	6.77198	7.6689	7.36988	7.36584	7.60474	7.31589	7.29119	7.17569
5159	Q8N201;E9PBV8	Integrator complex subunit 1	INTS1	0.335127	0.0841656	-0.250962	no	no	8.9935e-23	425460000	8	8	1	5	2	3	4	5	1	5	2	3	4	5	4.6	244.29	2190	3	4	3	6	5	6	0.5	3.1	1.1	1.6	2.1	2.9	6.99658	6.76148	6.61779	7.77767	7.48985	7.46303	7.75495	7.60203	7.22742	7.71594
1248	Q08170;E7EMJ8;F6T1J1	Serine/arginine-rich splicing factor 4	SRSF4	0.334224	-0.319387	-0.65361	no	no	2.5422e-93	983990000	10	5	10	8	9	9	9	9	5	3	4	4	4	4	16	56.678	494	9	9	6	7	8	8	16	15	15.8	15.8	15.8	15.8	8.1336	7.89645	7.75764	8.22616	7.94552	7.90374	8.09433	7.83701	7.74472	8.20976
6306	Q9NRX5	Serine incorporator 1	SERINC1	0.333817	0.54789	0.214073	no	no	2.6457e-11	207130000	3	3	1	2	1	2	1	2	1	2	1	2	1	2	7.5	50.494	453	2	4	3	4	2	5	2.9	5.5	2.9	4.9	2.9	5.5	7.1858	7.06126	6.58242	7.83167	7.60918	7.4347	7.07664	6.929	6.53633	7.17788
1763	Q9UP95;F5H0S9;Q9UP95-2;F5H066;Q9UP95-3;F5H3C0;Q9UP95-4;B3KUS0	Solute carrier family 12 member 4	SLC12A4	0.333718	0.0638465	-0.269871	no	no	3.7893e-76	954600000	11	7	7	7	7	8	7	8	4	3	5	5	3	4	10.3	120.65	1085	10	8	10	11	8	7	5.6	5.3	6.6	6.8	6.9	6.4	8.22773	8.04332	7.76673	8.14541	7.91158	7.76488	8.22616	8.01595	7.81014	8.17831
1794	F5H1Z9;Q05682-4;Q05682-5;Q05682;Q05682-2;A8K0X1;Q05682-3;E7EX44;E9PGZ1;C9J813;E7EUR9;F8WE61;C9JE79	Caldesmon	CALD1	0.333488	0.397847	0.0643593	no	no	0	27230000000	43	37	39	39	39	35	33	37	34	33	33	32	29	33	62.1	62.711	543	134	147	138	122	124	131	54.9	58.4	59.1	49.7	52.7	55.1	9.7341	9.56334	9.2461	9.70389	9.50458	9.26979	9.72801	9.54054	9.27279	9.50545
618	Q86XP1;Q86XP1-2;Q86XP1-3;B4DZ34;F5GYP2	Diacylglycerol kinase eta	DGKH	0.333307	-0.0291349	-0.362442	no	no	9.7128e-24	265780000	4	4	2	3	2	3	4	3	2	3	2	3	4	3	6	134.86	1220	3	4	3	4	6	4	3.1	5.2	4.4	5.2	6	5.2	7.4618	7.2743	7.00668	7.47251	7.14367	7.19761	7.85923	7.70772	7.32832	7.57415
125	F5H7I1;O60879;C9J6U3;O60879-3;A6NML8;O60879-2	Protein diaphanous homolog 2	DIAPH2	0.332876	-1.09038	-1.42325	no	no	6.8854e-196	4630400000	17	17	12	13	12	12	14	13	12	13	12	12	14	13	21	125.54	1103	44	40	38	40	38	42	15.4	16	15.2	15.2	17.3	17.5	8.90022	8.56529	8.63063	8.81796	8.38115	8.62022	8.84678	8.56901	8.52118	8.8608
4478	Q16706	Alpha-mannosidase 2	MAN2A1	0.332182	0.503957	0.171775	no	no	1.1948e-202	6339000000	26	26	14	20	17	11	16	19	14	20	17	11	16	19	28.7	131.14	1144	32	48	42	30	42	44	17	23.3	17.6	14.1	19.5	20.5	8.92076	8.77393	8.37845	8.99405	8.80168	8.54776	9.11538	8.97285	8.56215	8.87288
2817	O95870;B7Z4R6;F6WSP1;F2Z3H2	Abhydrolase domain-containing protein 16A	ABHD16A	0.332071	0.172571	-0.1595	no	no	2.0737e-63	912010000	9	9	6	5	7	6	5	5	6	5	7	6	5	5	25.1	63.243	558	7	8	8	7	6	8	16.5	14.9	21.3	17	12.2	13.3	8.12379	7.94925	7.64352	8.12343	7.88291	7.75209	8.13799	7.94398	7.69464	8.14851
2740	O95155;O95155-2;O95155-3	Ubiquitin conjugation factor E4 B	UBE4B	0.331768	0.11491	-0.216858	no	no	4.0447e-120	1151200000	13	13	9	10	6	10	9	7	9	10	6	10	9	7	15	146.18	1302	17	16	10	18	20	12	8.4	10.3	6.1	11.9	11	6.8	8.16277	7.9576	7.73858	8.28144	7.98712	7.9736	8.10154	7.92443	7.62643	8.43409
1232	E7EM49;O60895	Receptor activity-modifying protein 2	RAMP2	0.329576	-0.828631	-1.15821	no	no	4.4812e-21	345770000	2	2	2	2	2	2	2	2	2	2	2	2	2	2	12.2	20.063	180	3	3	3	2	3	3	12.2	12.2	12.2	12.2	12.2	12.2	7.77951	7.5176	7.43548	7.5568	7.15183	7.33955	7.82184	7.48541	7.55354	7.73628
5746	Q96SL4	Glutathione peroxidase 7	GPX7	0.329213	0.360879	0.0316659	no	no	8.6527e-40	966270000	4	4	3	2	2	3	2	2	3	2	2	3	2	2	33.2	20.996	187	8	10	9	8	8	8	28.9	21.9	21.9	26.2	21.9	21.9	8.19198	8.02596	7.69404	8.12707	7.91787	7.70944	8.3528	8.17365	7.88174	7.85837
1504	E9PDJ3;Q9BSQ5;Q9BSQ5-2;F5H551;F5H0E1;C9JUH3;E9PEC4;Q6P456	Malcavernin	CCM2	0.329126	-0.0592169	-0.388342	no	no	2.1601e-29	175850000	4	4	2	2	3	1	3	3	2	2	3	1	3	3	13.5	51.412	465	3	4	4	1	6	3	4.9	6.9	11.8	3.2	8.6	11.8	7.36436	7.0456	7.08037	7.59954	7.35	7.24012	7.62662	7.42292	7.19995	6.77271
5172	Q8N3Y1;Q8N3Y1-2	F-box/WD repeat-containing protein 8	FBXW8	0.328016	-0.200755	-0.528771	no	no	1.0541e-25	230510000	2	2	2	2	2	2	2	2	2	2	2	2	2	2	5.2	67.393	598	4	3	3	3	2	2	5.2	5.2	5.2	5.2	5.2	5.2	7.6169	7.36771	7.25698	7.31317	7.02743	6.99629	7.67253	7.46988	7.2441	7.73654
3243	P23469;P23469-2;P23469-3;F5H0X4;Q5VWH5;B4DRZ3;Q5VWH6	Receptor-type tyrosine-protein phosphatase epsilon	PTPRE	0.327705	0.238885	-0.0888201	no	no	2.417e-63	1285200000	11	9	5	9	7	8	10	8	4	7	6	7	9	7	25	80.641	700	7	16	11	13	12	10	12.7	19.3	18.1	19.7	23.9	18.1	8.06871	7.86892	7.63541	8.35042	8.10609	7.98418	8.31173	8.14445	7.81646	8.30073
2780	O95479	GDH/6PGL endoplasmic bifunctional protein;Glucose 1-dehydrogenase;6-phosphogluconolactonase	H6PD	0.327557	0.0561313	-0.271426	no	no	5.6055e-67	1169700000	10	10	6	8	5	4	9	5	6	8	5	4	9	5	16.6	88.892	791	11	16	10	8	15	9	10.6	13.9	8.5	8.3	15	9.5	8.19446	8.01949	7.71511	8.50725	8.26152	8.14283	7.99741	7.75472	7.62896	8.2058
1720	F5GY05;F5GZX9;Q96EK7;F2Z2E1;B4DL34;Q96EK7-2	Constitutive coactivator of peroxisome proliferator-activated receptor gamma	FAM120B	0.326681	0.478587	0.151907	no	no	5.2127e-41	323360000	5	5	3	4	3	2	4	3	3	4	3	2	4	3	6.5	106.12	933	5	7	4	4	8	5	3.9	5.6	3.8	2.8	4.8	3.9	7.60188	7.37548	7.21067	7.78657	7.53093	7.43484	7.74295	7.36152	7.50975	7.54314
1639	Q13490;E9PMH5;F5GYF2;B4E026;H0YDY3;E9PIW1;E9PNM6	Baculoviral IAP repeat-containing protein 2	BIRC2	0.326011	0.390491	0.06448	no	no	4.5587e-15	279850000	3	3	3	2	2	2	2	2	3	2	2	2	2	2	5.2	69.899	618	3	4	3	5	3	4	5.2	3.7	3.7	3.7	3.7	3.7	7.63734	7.49035	7.09541	7.48828	7.27937	7.07019	7.80656	7.65152	7.284	7.81405
6155	Q9H7D7-2			0.325995	0.181035	-0.14496	no	no	3.1149e-199	378700000	20	1	15	12	12	9	13	15	1	1	1	1	1	1	46	70.459	645	2	3	3	2	3	2	39.5	33	31.9	27.4	34.3	38.9	7.72102	7.36543	7.46845	7.70396	7.38764	7.41769	7.97447	7.76366	7.55943	7.61642
2165	P34947;G8JLE8;B4DPB3	G protein-coupled receptor kinase 5	GRK5	0.325608	-0.71079	-1.0364	no	no	1.2344e-15	255660000	3	3	1	2	3	2	2	2	1	2	3	2	2	2	6.9	67.786	590	4	5	6	8	7	8	2.4	4.2	6.9	4.2	4.2	4.2	7.56777	7.27289	7.2605	7.34234	6.96853	7.1036	7.70042	7.43114	7.36513	7.58946
4572	Q52LW3;F8VWZ8;Q52LW3-2	Rho GTPase-activating protein 29	ARHGAP29	0.325344	0.33929	0.0139459	no	no	7.6953e-139	3505600000	21	21	9	13	9	12	12	10	9	13	9	12	12	10	22	142.06	1261	20	29	23	28	27	24	10.4	12.8	10.2	13.2	11.5	10.7	8.6952	8.54946	8.15017	8.74771	8.5222	8.3552	8.72332	8.54652	8.24761	8.78659
4737	Q5VW36	Focadhesin	FOCAD	0.325057	-0.214871	-0.539928	no	no	3.0792e-114	2659300000	14	14	12	12	11	11	12	13	12	12	11	11	12	13	11.2	200.07	1801	27	26	20	24	26	28	10.1	9.4	8.8	9.6	10.1	10.7	8.60999	8.37367	8.23287	8.56844	8.28271	8.25152	8.61187	8.43027	8.14557	8.59061
2314	O00468	Agrin	AGRN	0.325049	0.418851	0.0938021	no	no	1.8078e-24	264250000	5	5	4	4	2	2	3	4	4	4	2	2	3	4	2.7	214.84	2045	5	4	2	2	4	3	2.1	2.3	1.2	1.2	1.9	2.3	7.69248	7.53446	7.17676	7.75387	7.57898	7.27434	7.4918	7.36303	6.90103	7.45752
1565	Q15418-2;Q15418;E9PGT3;E9PRI4;Q15418-3;E9PGT4	Ribosomal protein S6 kinase alpha-1;Ribosomal protein S6 kinase	RPS6KA1	0.324967	-0.906444	-1.23141	no	no	3.6817e-63	84448000	9	2	7	6	7	8	7	8	1	0	1	2	1	1	14.9	83.931	744	2	0	3	2	3	1	12.5	10.2	12.5	13.4	12.5	13.4	6.94085	6.59389	6.68135	NaN	NaN	NaN	7.48071	7.12804	7.2258	7.22717
2299	O00291;E7ES17;C9JMG5	Huntingtin-interacting protein 1	HIP1	0.324633	-0.354791	-0.679424	no	no	6.8074e-40	337720000	7	5	3	4	3	4	4	3	2	2	2	3	3	2	9.4	116.22	1037	3	4	3	4	4	3	3.4	4.7	3.4	4.4	6.3	3.8	7.24112	6.95628	6.92325	7.33724	6.99871	7.07074	7.67065	7.42784	7.30237	7.55552
5829	Q9BQ70;Q9H384;Q9H7D3	Transcription factor 25	TCF25	0.323123	0.0501439	-0.272979	no	no	4.7252e-94	1199800000	9	9	5	5	7	8	6	6	5	5	7	8	6	6	17.2	76.666	676	6	12	13	15	9	9	11.5	11.7	14.6	15.8	11.2	14.6	7.91007	7.70544	7.48495	8.04755	7.8019	7.68302	8.47672	8.27277	8.05046	8.57059
5524	Q96AY4;B0QYP5	Tetratricopeptide repeat protein 28	TTC28	0.322155	-0.196985	-0.519139	no	no	1.5377e-40	567360000	9	9	5	4	4	4	5	2	5	4	4	4	5	2	6.2	270.88	2481	5	5	7	4	5	5	3.3	3.4	3.6	3.1	3.8	2.1	8.12476	7.91535	7.70749	7.88289	7.72809	7.3598	8.008	7.83943	7.51538	7.93367
6790	Q9Y2G5;Q9Y2G5-1;Q9Y2G5-2	GDP-fucose protein O-fucosyltransferase 2	POFUT2	0.321525	0.384301	0.0627761	no	no	2.7936e-97	2959700000	10	9	10	7	9	7	9	9	9	7	9	7	8	8	17.9	49.975	429	31	29	34	31	28	31	17.9	14.2	17.9	14.2	14.5	16.3	8.68966	8.50236	8.23414	8.64816	8.4116	8.2714	8.77679	8.60342	8.29418	8.45699
4573	Q53EP0;Q53EP0-2	Fibronectin type III domain-containing protein 3B	FNDC3B	0.321401	0.812993	0.491592	no	no	2.0148e-245	8653400000	20	20	17	17	13	12	14	15	17	17	13	12	14	15	23.9	132.89	1204	39	37	32	23	33	31	20.4	18.8	13.1	13.9	16.2	17.8	9.14117	9.01966	8.52876	9.09958	8.92891	8.61145	9.20202	9.09412	8.5444	9.0739
1525	F6XZQ7;P28161;E9PHN6;E9PEM9;A6NGW8;E9PHN7;E9PLF1;E9PGV1	Glutathione S-transferase Mu 2	GSTM2	0.321215	-0.799004	-1.12022	no	no	4.2643e-67	491420000	10	3	9	8	8	7	8	8	2	2	2	1	2	3	44.5	26.097	220	3	3	4	2	3	5	40	40	40	30.5	40	40.5	7.85119	7.57965	7.51853	7.65783	7.27214	7.42762	7.73605	7.43569	7.43435	7.49774
4747	Q5VZL5;Q5VZL5-4;Q5VZL5-2;Q5VZL5-3	Zinc finger MYM-type protein 4	ZMYM4	0.320742	0.170832	-0.14991	no	no	1.364e-45	554370000	6	6	3	5	3	5	5	6	3	5	3	5	5	6	4	172.79	1548	6	10	8	10	12	14	1.9	3.4	1.9	3.3	3.4	4	7.77377	7.60362	7.28452	7.75745	7.4866	7.42398	7.92145	7.77313	7.38281	8.02428
6289	Q9NRF8;E9PBY8	CTP synthase 2	CTPS2	0.319992	-0.0822938	-0.402286	no	no	1.6349e-182	1187700000	13	11	12	10	10	11	10	11	10	8	8	9	8	9	30.2	65.677	586	13	10	14	17	12	10	28	23.9	23.9	26.6	23.7	24.4	8.30203	8.10041	7.87189	8.26928	8.00591	7.92698	8.37471	8.15894	7.96749	8.2493
5432	Q92556;B4DJV6;Q92556-3;Q92556-2;C9IZR8;C9JIW2	Engulfment and cell motility protein 1	ELMO1	0.31985	0.135634	-0.184217	no	no	7.0333e-136	2275800000	11	10	6	10	7	6	9	9	5	9	6	6	8	8	20.8	83.829	727	13	20	17	14	21	17	15	19.1	14.6	13.6	18.2	17.7	8.48878	8.3033	8.02983	8.54301	8.29649	8.17964	8.58678	8.41285	8.10531	8.54495
4730	Q5VUB5	Protein FAM171A1	FAM171A1	0.318866	0.260757	-0.0581087	no	no	2.3232e-44	155000000	2	2	2	2	2	2	2	2	2	2	2	2	2	2	4	97.853	890	5	5	5	4	5	6	4	4	4	4	4	4	7.44891	7.2521	7.01047	7.11287	6.8969	6.70597	7.5642	7.39018	7.08293	7.46141
2476	O43314;O43314-2;E9PGM8;D6RFZ8;Q6PFW1;Q6PFW1-2;B7WPL9;F8W9A8;Q6PFW1-3;Q6PFW1-4;Q6PFW1-7;Q6PFW1-5;Q6PFW1-6;D6RBU4;H0Y9S9;H0Y9M0;D6RFG4	Inositol hexakisphosphate and diphosphoinositol-pentakisphosphate kinase 2	PPIP5K2	0.318805	0.186689	-0.132116	no	no	2.8087e-78	830660000	11	8	8	9	8	7	10	8	6	7	6	5	7	5	10.1	140.41	1243	11	18	16	16	15	16	7.4	8.6	7.4	6.3	8.9	6.9	7.97547	7.80093	7.49524	8.01578	7.76348	7.65988	8.23702	8.07693	7.72603	8.2319
213	Q9NVN8;A8MX10;Q52LT0	Guanine nucleotide-binding protein-like 3-like protein;Putative GTP-binding protein FLJ12595	GNL3L	0.318685	0.117177	-0.201508	no	no	2.1881e-05	252360000	2	2	1	1	1	1	2	1	1	1	1	1	2	1	4.3	65.572	582	2	2	2	3	3	2	1.5	1.5	1.5	1.5	4.3	1.5	7.41652	7.24269	6.93485	7.59306	7.27497	7.30846	7.62788	7.44063	7.17228	7.55105
2020	Q14C86-6;Q14C86;Q14C86-2;Q14C86-5;Q14C86-4;Q14C86-3;F8W9S7;C9IZ08;B4DGD8;H0Y7I9;C9IZX9;B3KMM3;H0Y4E7	GTPase-activating protein and VPS9 domain-containing protein 1	GAPVD1	0.317496	0.21088	-0.106616	no	no	8.8135e-82	4075800000	18	18	13	12	13	10	13	12	13	12	13	10	13	12	15.1	166.17	1487	19	17	19	17	18	17	12.6	9.4	12.5	9.7	13	11.9	8.86926	8.6633	8.44634	8.87607	8.62946	8.5128	8.81578	8.60665	8.39803	8.74464
4149	Q12913	Receptor-type tyrosine-protein phosphatase eta	PTPRJ	0.317033	0.518618	0.201586	no	no	1.9076e-07	745490000	4	4	3	2	1	2	2	0	3	2	1	2	2	0	4.5	145.94	1337	3	2	1	2	2	0	3.9	2.6	1.7	1.5	2.6	0	8.21362	8.07273	7.65626	8.16982	7.97982	7.7193	7.42208	7.25164	6.93343	8.34353
5466	Q92835;Q92835-2;Q92835-3;H0Y5Q9;F5GXI6;C9JF09;C9JLW2	Phosphatidylinositol 3,4,5-trisphosphate 5-phosphatase 1	INPP5D	0.316725	-0.22231	-0.539035	no	no	1.2842e-69	574970000	13	11	6	9	8	8	8	9	6	7	7	7	7	7	15.3	133.29	1189	12	16	15	16	17	17	5.8	10.8	8.2	7.8	9.9	8.3	7.70656	7.49456	7.29343	7.99671	7.67957	7.71122	7.97744	7.77464	7.54927	7.99378
5484	Q93008;Q93008-1;E9PFG1	Probable ubiquitin carboxyl-terminal hydrolase FAF-X	USP9X	0.316114	-0.0963969	-0.412511	no	no	0	7441200000	45	21	26	33	28	29	27	32	13	17	12	15	12	15	21.6	292.28	2570	31	36	25	36	30	31	12.6	15.1	12.1	14.7	12.1	14.4	9.06826	8.86829	8.63528	9.0023	8.73659	8.66282	9.17432	8.97684	8.73706	9.1087
2977	P09211;A8MX94	Glutathione S-transferase P	GSTP1	0.315977	-0.0357646	-0.351741	no	no	2.8941e-234	90798000000	15	15	15	14	15	15	15	14	15	14	15	15	15	14	70	23.356	210	95	89	87	103	96	82	70	70	70	70	70	70	10.1265	9.90423	9.72921	10.1966	9.9305	9.85754	10.213	9.97771	9.83441	10.1548
5293	Q8NI08-2;Q8NI08;G8JL91;H0Y5F6;Q8NI08-5;Q5JVL2;H0Y620;Q5JVL1;Q8NI08-3;Q8NI08-4;Q5TF96;Q5TF97	Nuclear receptor coactivator 7	NCOA7	0.314306	-0.532167	-0.846473	no	no	2.8964e-51	583530000	8	5	7	8	6	7	7	5	4	5	3	4	4	3	13.2	104.85	931	10	11	8	11	11	9	10.4	13.2	8.7	10.4	10.4	7.3	7.96797	7.66615	7.66773	7.96139	7.60024	7.71316	7.98584	7.71731	7.64969	8.04532
3322	P28838;P28838-2;H0Y9Q1;H0Y983	Cytosol aminopeptidase	LAP3	0.313986	-0.234747	-0.548732	no	no	0	26210000000	29	29	28	28	27	29	26	28	28	28	27	29	26	28	63.8	56.166	519	95	99	97	88	99	90	61.7	63.4	59.9	63.8	59.7	63.4	9.6176	9.40649	9.20303	9.65188	9.3728	9.32773	9.6539	9.44411	9.23722	9.58583
481	Q9Y3Q3;B4DN05;F5H4M7;G3V1J9	Transmembrane emp24 domain-containing protein 3	TMED3	0.313941	-0.0153549	-0.329296	no	no	1.0937e-10	334150000	3	3	3	3	3	2	3	2	3	3	3	2	3	2	17.1	24.777	217	4	5	3	4	3	3	17.1	17.1	17.1	9.2	17.1	13.4	7.71766	7.53131	7.26033	7.81708	7.62046	7.37831	7.86837	7.68088	7.41318	7.35268
2396	O15027-5;O15027;O15027-3;O15027-4;O15027-2;A4QN19;C9JVR0;H0Y5S1;Q8N9G1;F6VLX6	Protein transport protein Sec16A	SEC16A	0.313426	0.132641	-0.180784	no	no	1.1928e-232	7478900000	29	29	21	20	18	21	20	18	21	20	18	21	20	18	23.5	235.75	2201	44	34	28	39	40	30	16.5	16	14	16.4	15.2	12.7	9.08686	8.89664	8.63667	8.94467	8.6915	8.58984	9.19758	9.03362	8.69513	9.21037
5888	Q9BTT6	Leucine-rich repeat-containing protein 1	LRRC1	0.312995	-0.594357	-0.907352	no	no	7.9864e-24	308480000	1	1	1	1	1	1	1	1	1	1	1	1	1	1	2.7	59.241	524	2	2	2	2	2	2	2.7	2.7	2.7	2.7	2.7	2.7	7.67057	7.39386	7.34378	7.25626	6.93253	6.97679	7.81096	7.54414	7.47279	7.99416
3661	P51153	Ras-related protein Rab-13	RAB13	0.312958	0.0784571	-0.234501	no	no	1.3143e-36	2220700000	10	7	7	7	7	8	8	7	4	4	4	5	5	4	50.2	22.774	203	10	9	9	11	8	9	33.5	30	33.5	40.9	36.9	34	8.61978	8.40064	8.21775	8.54453	8.26257	8.22355	8.57918	8.35478	8.18503	8.4946
5100	Q8IX12;Q8IX12-2;F5H2E6;F5H1H2;F5H3E1;H0YFJ7;F5H218	Cell division cycle and apoptosis regulator protein 1	CCAR1	0.312657	0.148257	-0.1644	no	no	0	8498900000	22	22	18	19	19	19	21	21	18	19	19	19	21	21	25	132.82	1150	48	53	52	49	51	51	20.7	21.5	21.5	21.9	24.2	23.5	9.06266	8.87332	8.61085	9.0515	8.79512	8.70066	9.26141	9.0639	8.82418	9.15385
1462	Q8WTW3;E9PBL8	Conserved oligomeric Golgi complex subunit 1	COG1	0.312595	-0.155102	-0.467697	no	no	2.1529e-31	485330000	7	7	3	3	2	3	4	3	3	3	2	3	4	3	11.2	108.98	980	4	4	2	3	5	2	5.7	6.8	4.7	6.8	6.8	5.9	7.7179	7.50305	7.30923	7.9147	7.6575	7.5649	7.80109	7.57791	7.40518	8.14523
4401	Q15386;Q15386-2;Q15386-3	Ubiquitin-protein ligase E3C	UBE3C	0.312592	-0.105544	-0.418136	no	no	2.0038e-66	1710500000	11	11	5	8	10	5	8	7	5	8	10	5	8	7	11.3	123.92	1083	8	12	16	14	14	15	5.8	8.4	10.5	5.8	8.2	7.5	8.16137	7.94908	7.74866	8.3075	8.02127	7.99113	8.6077	8.39062	8.20249	8.5533
2137	E7EWW0;Q7Z3J2;F5H7K1;G5E9I3;C9J7I2;Q7Z3J2-2;F6S1J4	UPF0505 protein C16orf62	C16orf62	0.312269	0.022317	-0.289952	no	no	1.094e-167	3791400000	20	20	15	15	14	16	15	13	15	15	14	16	15	13	27.9	118.61	1052	26	31	30	34	32	31	22.5	22.8	20.4	22.8	18.8	20.1	8.72596	8.52046	8.30231	8.80528	8.53296	8.47352	8.84911	8.65977	8.39735	8.81478
987	Q13905-3;Q68DL3;Q13905;C9JL20;F5H4P5;Q13905-2;Q5JUE6;F5H704;H0Y6R4	Rap guanine nucleotide exchange factor 1	DKFZp781P1719;RAPGEF1	0.312155	-0.722553	-1.03471	no	no	2.8953e-57	314800000	4	3	3	4	4	3	4	2	2	3	3	2	3	2	5.6	122.73	1095	3	5	5	3	4	4	3.6	5.6	5.6	3.6	5.6	2.7	7.46673	7.16334	7.16803	7.89994	7.49482	7.68279	7.78665	7.49841	7.47245	7.49058
5647	Q96JC1;Q96JC1-2	Vam6/Vps39-like protein	VPS39	0.311427	0.0367775	-0.274649	no	no	8.1167e-40	527460000	8	8	5	4	5	5	6	4	5	4	5	5	6	4	11.1	101.81	886	8	6	8	7	8	5	6.2	7.3	6.9	8.2	8.4	5	7.90325	7.72296	7.43441	7.79677	7.49967	7.49177	8.01945	7.79846	7.62017	8.08077
6234	Q9HD67;E7EPL7;E9PEW5;D6RGD1;E9PCN3;Q8IVX5	Unconventional myosin-X	MYO10	0.311193	-0.302056	-0.613249	no	no	6.1423e-103	2008600000	18	17	11	11	10	11	11	13	10	10	9	10	10	12	13.3	237.34	2058	19	22	19	20	25	23	8.2	7.2	7.2	7.5	7.9	9.3	8.35091	8.09975	7.9935	8.54495	8.27275	8.21304	8.50893	8.29861	8.09311	8.50669
6363	Q9NVG8;Q9NVG8-2;B3KW04	TBC1 domain family member 13	TBC1D13	0.311032	0.0357863	-0.275245	no	no	7.921e-97	1975900000	13	13	11	10	9	9	10	7	11	10	9	9	10	7	44.2	46.553	400	21	21	17	18	26	18	38.8	35.8	33.8	31.2	35.2	29.2	8.5679	8.34274	8.17487	8.51267	8.2642	8.15183	8.46145	8.25208	8.04411	8.43431
3215	P22059;B7WNL4;H0YCV6	Oxysterol-binding protein 1;Oxysterol-binding protein	OSBP	0.31094	0.164415	-0.146525	no	no	0	10771000000	28	27	22	22	22	22	22	26	21	21	21	21	21	25	40.9	89.42	807	50	52	45	57	57	58	33.7	33.3	33.3	36.6	35.2	37.4	9.27249	9.10089	8.78627	9.17351	8.93107	8.80473	9.19493	9.02086	8.7137	9.24353
1641	Q9NZN5;Q9NZN5-2;E9PMR6	Rho guanine nucleotide exchange factor 12	ARHGEF12	0.310426	-0.502442	-0.812868	no	no	1.75e-27	1083500000	8	8	1	5	4	2	5	3	1	5	4	2	5	3	9.3	173.23	1544	1	5	7	2	7	5	1.4	5.5	4.1	3.2	5.6	3.5	7.04036	6.70552	6.77072	7.80458	7.50675	7.50033	8.76729	8.68846	7.98736	7.32422
2267	Q9P2K8;Q9P2K8-2;H0YME5;Q9P2K8-3	Eukaryotic translation initiation factor 2-alpha kinase 4	EIF2AK4	0.309343	0.0159722	-0.29337	no	no	2.0561e-87	1526100000	16	16	11	10	9	8	7	10	11	10	9	8	7	10	15.4	186.91	1649	20	19	16	18	13	21	9.7	9.2	8.6	8.4	6.5	9.6	8.4097	8.21152	7.97365	8.4335	8.18577	8.0717	8.4238	8.22629	7.9866	8.26956
2115	Q8NFD5-3;Q8NFD5-2;Q8NFD5;G3XAA0;H0Y7H8;Q8NFD5-4	AT-rich interactive domain-containing protein 1B	ARID1B	0.309062	0.0853919	-0.22367	no	no	2.1349e-11	131760000	3	3	2	2	2	2	2	2	2	2	2	2	2	2	3.2	241.46	2289	1	2	2	2	2	3	1.8	1.8	2.6	2.6	1.8	1.8	7.16838	7.03499	6.59079	6.83719	6.55841	6.51271	7.62212	7.4535	7.12966	7.079
6072	Q9H1B7	Interferon regulatory factor 2-binding protein-like	IRF2BPL	0.30891	-0.522156	-0.831067	no	no	8.4144e-24	402260000	5	3	4	4	4	3	3	3	2	3	2	2	2	2	7.3	82.658	796	9	5	6	7	7	6	5.9	5.3	5.9	3.9	3.9	3.9	7.86252	7.59793	7.52171	7.94103	7.59748	7.67874	7.8224	7.5586	7.48064	7.78551
951	C9JDG0;Q9NSV4;C9JDG1;Q9NSV4-4;Q9NSV4-7;F8W838;C9JL55;Q9NSV4-5;A8MYX0;Q9NSV4-6;C9JDG2;A6NG52;Q9NSV4-1;Q9NSV4-2	Protein diaphanous homolog 3	DIAPH3	0.308567	0.0835386	-0.225028	no	no	1.2986e-46	950100000	8	8	4	4	4	6	4	5	4	4	4	6	4	5	5.7	136.88	1193	10	10	9	12	10	12	2.8	3.8	2.8	4.5	3.8	3.9	8.15839	7.96904	7.70666	8.11448	7.88478	7.72804	8.17435	7.99118	7.71104	8.28065
1062	P54922;C9JZW7	[Protein ADP-ribosylarginine] hydrolase	ADPRH	0.308477	-0.339251	-0.647729	no	no	3.9357e-07	69912000	3	3	2	2	2	2	2	3	2	2	2	2	2	3	11.5	39.506	357	3	5	2	4	3	3	5.9	5.9	5.9	5.9	5.9	11.5	6.94218	6.69997	6.5731	7.16929	6.80381	6.92436	6.9019	6.66519	6.52536	6.99631
1870	F5H5R8;P18440	Arylamine N-acetyltransferase 1	NAT1	0.308413	0.0785789	-0.229834	no	no	2.1546e-14	351590000	4	4	3	3	3	4	2	2	3	3	3	4	2	2	18.2	40.845	352	7	7	8	8	4	4	12.8	12.8	11.6	18.2	6.2	6.2	7.61611	7.42428	7.16882	7.68174	7.49849	7.21856	8.03173	7.65143	7.79768	7.9112
14	Q86X10;A2A2E9;Q86X10-3;A2A2F0;Q86X10-2;Q86X10-4;B4E2E8	Ral GTPase-activating protein subunit beta	RALGAPB;RP5-1100H13.1	0.308168	-0.276794	-0.584963	no	no	1.1836e-55	574300000	4	4	3	4	3	3	3	3	3	4	3	3	3	3	5.8	166.8	1494	4	6	5	3	3	3	4	5.8	4	4	4	4	7.8002	7.6153	7.34017	8.0604	7.6913	7.81823	8.13021	7.87433	7.77879	7.87595
1293	E7EPL3;Q7Z401	C-myc promoter-binding protein	DENND4A	0.307875	0.157705	-0.15017	no	no	1.4978e-49	421900000	6	6	2	5	4	4	4	3	2	5	4	4	4	3	6.1	213.7	1906	3	7	6	7	5	5	2.2	5.6	3.4	4.8	4.9	2.9	7.57526	7.4367	7.01166	7.6974	7.4288	7.36133	8.04021	7.87453	7.54149	8.05975
6931	Q9Y5Z0;Q9Y5Z0-2;Q9Y5Z0-4;Q9Y5Z0-5;Q9Y5Z0-3	Beta-secretase 2	BACE2	0.307422	0.175305	-0.132116	no	no	1.2489e-11	267700000	2	2	2	2	2	1	1	1	2	2	2	1	1	1	6.2	56.18	518	3	3	4	2	2	2	6.2	6.2	6.2	3.7	3.7	3.7	7.48554	7.25178	7.10483	8.19797	7.2528	8.14569	7.60208	7.40459	7.16486	7.10612
2589	O75051;O75051-2	Plexin-A2	PLXNA2	0.306778	-0.00460935	-0.311387	no	no	1.5829e-119	2395200000	24	21	16	19	14	11	15	15	13	16	11	8	12	12	16.9	211.1	1894	18	22	13	11	17	16	10.9	13.6	8.7	6.7	9.5	10.1	8.5927	8.41223	8.12421	8.85912	8.55064	8.56541	8.44085	8.25266	7.98694	8.553
5399	Q8WWN8;G5E9Y3;B4DIT1;Q05CH1;E5RJU5	Arf-GAP with Rho-GAP domain, ANK repeat and PH domain-containing protein 3	ARAP3	0.306171	-0.124328	-0.430499	no	no	4.5027e-103	2914000000	15	15	10	9	6	9	13	12	10	9	6	9	13	12	14.8	169.84	1544	18	16	10	16	19	16	9.3	9.7	5.4	8.9	13.5	11.7	8.57774	8.34372	8.19745	8.77228	8.4774	8.46501	8.53279	8.32181	8.11803	8.62262
2379	O14924;O14924-4;O14924-3;O14924-2;Q8WX95;B7Z764;E9PCG5;E9PBG5	Regulator of G-protein signaling 12	RGS12	0.305969	0.202572	-0.103397	no	no	1.2391e-40	82679000	3	3	3	3	3	3	2	3	3	3	3	3	2	3	2.1	156.36	1447	3	4	3	3	2	3	2.1	2.1	2.1	2.1	1	2.1	7.01678	6.82198	6.57479	7.04403	6.7797	6.7029	7.26169	7.0743	6.80637	7.3154
3036	P11274;P11274-2;H0Y2V4;H0Y554;A9UF05;A9UF01;E9PGJ4;A9UF04;E9PCM1	Breakpoint cluster region protein	BCR	0.305694	0.0945566	-0.211137	no	no	6.0809e-83	1359800000	13	12	7	9	9	8	10	10	6	8	8	7	9	9	15.1	142.82	1271	13	17	13	15	16	16	9	11.5	10.9	8.8	12.5	12	8.29137	8.12261	7.79916	8.25472	7.96546	7.94161	8.45726	8.17719	8.13421	8.37701
3958	P78552;E7EWK2;Q9UDY5	Interleukin-13 receptor subunit alpha-1	IL13RA1	0.305523	-0.803971	-1.10949	no	no	1.1761e-09	237680000	3	3	2	3	2	2	2	2	2	3	2	2	2	2	8.4	48.759	427	8	5	6	7	3	4	4.9	8.4	4.9	4.9	4.9	4.9	7.7417	7.4294	7.45163	7.50907	7.14183	7.26548	7.75395	7.34602	7.53864	7.66456
4891	Q709C8;Q709C8-3;Q709C8-2;Q709C8-4	Vacuolar protein sorting-associated protein 13C	VPS13C	0.305437	-0.335369	-0.640806	no	no	0	6363700000	45	45	29	28	27	29	30	33	29	28	27	29	30	33	17.6	422.39	3753	69	64	66	64	78	72	10.6	11.1	10.5	11	12.1	12.4	9.00329	8.74976	8.64895	8.98302	8.67549	8.68839	9.02555	8.76722	8.67721	8.95395
6477	Q9NZM1;Q9NZM1-6;F8W8J4;Q9NZM1-3;Q9NZM1-2;Q9NZM1-5;H0YD14	Myoferlin	MYOF	0.305297	-0.483055	-0.788352	no	no	0	4042800000	113	5	100	108	97	102	101	99	4	5	4	4	4	4	60.5	234.71	2061	9	8	6	7	8	9	54.1	57.4	53	54.8	54.3	54.3	8.79287	8.54925	8.42568	8.79445	8.45787	8.52627	8.63319	8.42302	8.21709	8.95803
2898	P05121;F8WD53;B7Z1D9;C9J272	Plasminogen activator inhibitor 1	SERPINE1	0.305199	0.680359	0.37516	no	no	1.7519e-227	83708000000	21	21	19	18	17	17	18	19	19	18	17	17	18	19	59.5	45.059	402	68	100	94	72	76	80	53.5	57.5	57.5	52.5	57.5	57.5	10.0799	9.95329	9.48293	10.1832	10.0201	9.67896	10.2182	10.0594	9.70449	9.9804
1498	E9PDA5;Q70IA6;Q70IA6-2	MOB kinase activator 2	MOB2	0.304276	0.147308	-0.156968	no	no	9.9011e-06	96524000	2	2	2	1	0	2	1	0	2	1	0	2	1	0	7.8	30.174	268	4	2	0	3	2	0	7.8	4.1	0	7.8	4.1	0	7.58202	7.42865	7.05553	7.25924	7.02239	6.88285	NaN	NaN	NaN	7.35428
783	B7Z7L3;P00387;P00387-2;B1AHF3;F8WCX7	NADH-cytochrome b5 reductase 3;NADH-cytochrome b5 reductase 3 membrane-bound form;NADH-cytochrome b5 reductase 3 soluble form	CYB5R3	0.303366	-0.0549179	-0.358284	no	no	0	38625000000	20	20	17	18	19	16	18	18	17	18	19	16	18	18	70.1	38.226	334	83	92	102	76	94	84	63.2	69.8	63.2	62.9	63.2	63.2	9.81658	9.62476	9.36929	9.81208	9.55709	9.45954	9.85602	9.66009	9.41606	9.68187
3807	P60520	Gamma-aminobutyric acid receptor-associated protein-like 2	GABARAPL2	0.302805	-0.110898	-0.413702	no	no	1.0414e-24	646240000	6	5	4	3	5	5	3	4	3	2	4	4	2	3	46.2	13.667	117	7	8	9	7	6	10	35.9	23.1	46.2	46.2	23.1	32.5	7.93861	7.72882	7.52194	8.06506	7.80992	7.71273	8.08647	7.86912	7.68172	8.17254
662	B4E3T4;Q93062-3;Q93062-2;Q93062;F5H357;Q93062-5;Q93062-4;H0YBU9;H0YC46;E5RJ31;E5RFP4;E5RJD7	RNA-binding protein with multiple splicing	RBPMS	0.302471	0.733699	0.431229	no	no	1.1952e-19	368880000	3	3	2	2	2	1	2	2	2	2	2	1	2	2	20.1	24.997	224	2	2	2	1	2	2	10.7	10.7	13.8	4.5	10.7	15.6	7.74909	7.61947	7.1608	7.86694	7.70379	7.36273	7.80761	7.65727	7.2739	7.59971
1358	Q7KZF4;E7ESM6	Staphylococcal nuclease domain-containing protein 1	SND1	0.302455	0.012621	-0.289834	no	no	0	77757000000	49	49	43	43	41	44	43	42	43	43	41	44	43	42	56.4	102	910	162	163	155	171	156	156	52	53	50.1	53.2	51	50.7	10.0305	9.84451	9.57251	10.0948	9.84256	9.73884	10.1219	9.94306	9.65005	10.2031
415	Q66K74;B4DH53	Microtubule-associated protein 1S;MAP1S heavy chain;MAP1S light chain	MAP1S	0.302301	0.216468	-0.0858326	no	no	8.4718e-121	6473900000	14	14	9	9	10	10	10	11	9	9	10	10	10	11	21.2	112.21	1059	15	19	17	19	16	21	13.7	14.7	14.5	15.4	15.2	16.6	8.89728	8.71858	8.42532	9.04269	8.81751	8.64969	9.14248	8.9851	8.62533	8.93646
6009	Q9C035;A6NLP3;Q9C035-2;Q9C035-4;Q9BYJ4;F8W6N8;Q9C035-5;E7EQQ5;A8MX81;E7EU26;Q9C030-2;Q9C030;A6NK30;E9PFM0;Q9BYJ4-2	Tripartite motif-containing protein 5	TRIM5	0.301832	0.0181474	-0.283685	no	no	2.4187e-39	728080000	8	4	4	6	3	5	5	6	3	3	2	3	4	4	18.5	56.338	493	8	8	7	6	8	9	8.1	11.4	5.5	11.8	11.6	13.2	7.96442	7.75297	7.55039	8.13792	7.85846	7.81418	8.14158	7.9551	7.68453	7.97624
730	B7Z373;Q5T0I1	Gelsolin	GSN	0.301611	-0.097476	-0.399087	no	no	0	130890000	21	1	18	19	18	17	18	18	1	1	1	0	1	1	36.3	81.94	742	3	2	3	0	2	2	31.4	32.5	32.1	28.4	32.5	31	7.41202	7.19426	7.00788	7.21819	6.92593	6.9082	7.5088	7.2559	7.15363	NaN
5184	Q8N5C1	Protein FAM26E	FAM26E	0.301564	0.34408	0.0425162	no	no	6.6013e-41	1479500000	5	5	5	4	4	4	4	4	5	4	4	4	4	4	21.7	35.17	309	11	10	9	11	11	11	21.7	21.7	21.7	10.7	21.7	10.7	8.44767	8.28594	7.94031	8.36769	8.17339	7.92485	8.45375	8.26425	8.00225	8.27676
908	C9J5N1;B4DI73;Q9BTE6-2;Q9BTE6;C9JUA3	Alanyl-tRNA editing protein Aarsd1	AARSD1	0.300933	0.251024	-0.0499095	no	no	6.0296e-25	469040000	7	7	3	3	1	3	2	5	3	3	1	3	2	5	25.3	55.065	495	4	3	1	3	2	5	8.9	13.5	2	11.9	7.5	14.7	7.75483	7.5654	7.30322	7.8462	7.53728	7.55292	7.34015	7.15372	6.88299	7.90545
2714	O94855-2;O94855;E9PDM8;E9PC44;F6RFB3	Protein transport protein Sec24D	SEC24D	0.300906	-0.0446039	-0.34551	no	no	5.4814e-233	10825000000	22	21	17	19	17	16	16	15	16	18	16	16	15	14	34.2	113.08	1033	44	49	44	37	42	38	25.6	29.4	26.5	23.6	26.7	23	9.23497	9.0383	8.79627	9.28619	9.02739	8.93838	9.29192	9.1003	8.84428	9.16994
5634	Q96HY7	Probable 2-oxoglutarate dehydrogenase E1 component DHKTD1, mitochondrial	DHTKD1	0.30078	-0.619742	-0.920522	no	no	5.2497e-26	473440000	4	4	3	4	4	3	3	4	3	4	4	3	3	4	7.1	103.08	919	5	6	7	5	5	6	4.8	7.1	7.1	4.8	4.8	7.1	7.84906	7.5414	7.55455	7.80482	7.45086	7.55096	7.9843	7.74024	7.61768	7.94574
4906	Q7L1W4	Leucine-rich repeat-containing protein 8D	LRRC8D	0.300443	-0.126841	-0.427284	no	no	2.1307e-17	676320000	3	3	3	3	3	2	3	3	3	3	3	2	3	3	5.9	98.2	858	6	7	6	2	6	5	5.9	5.9	5.9	4.7	5.9	5.9	8.06536	7.97181	7.3527	7.97074	7.87309	7.27473	8.38694	8.32044	7.53911	7.698
4855	Q6UB35;H0Y327;Q6UB35-2;Q5JYA8;Q5JYA3;Q5JYA4;Q5JYA5;Q4VXV2;Q4VXM0;H0Y2S0;Q4VXM1	Monofunctional C1-tetrahydrofolate synthase, mitochondrial	MTHFD1L	0.300322	0.497343	0.197021	no	no	6.3995e-160	7912700000	24	24	17	18	15	18	17	19	17	18	15	18	17	19	30.6	105.79	978	28	31	25	33	32	30	23.3	25.2	21.3	24.2	23.4	25.5	9.0421	8.89221	8.50733	9.09321	8.89882	8.65051	9.01242	8.86432	8.47328	9.2546
4121	Q10471;G3V1S6;F5GYB2;B7Z8V8	Polypeptide N-acetylgalactosaminyltransferase 2;Polypeptide N-acetylgalactosaminyltransferase 2 soluble form	GALNT2	0.299667	0.481586	0.181918	no	no	1.725e-134	8729300000	19	18	17	17	16	17	19	16	16	16	15	16	18	15	38	64.732	571	39	42	37	39	41	34	34.5	35	33.3	35	38	33.3	9.01182	8.86046	8.48062	9.06096	8.85465	8.63861	9.27163	9.1343	8.70479	9.2992
4	A0JNW5;A0JNW5-2;F8W665;F8VWX2	UHRF1-binding protein 1-like	UHRF1BP1L	0.299637	0.476719	0.177082	no	no	2.3747e-18	181820000	4	4	2	2	3	3	2	4	2	2	3	3	2	4	4	164.2	1464	2	3	5	5	2	3	2.4	2.7	3.5	3.5	2.7	4	7.11173	6.85055	6.76681	7.56188	7.29217	7.22706	7.58754	7.41496	7.10336	7.72369
3362	P31150;B4DHX4;G5E9U5	Rab GDP dissociation inhibitor alpha	GDI1	0.299569	-0.071488	-0.371057	no	no	0	13450000000	28	18	27	27	26	27	25	26	17	17	16	17	16	16	73.6	50.582	447	53	52	48	58	48	52	69.4	66.7	63.8	69.4	64	64.2	9.31936	9.1178	8.88909	9.35156	9.0923	9.00436	9.39836	9.19868	8.96486	9.27556
7	Q15652;A0T124;Q15652-2	Probable JmjC domain-containing histone demethylation protein 2C	JMJD1C	0.299209	0.0283809	-0.270828	no	no	2.6337e-32	524450000	7	7	4	5	3	5	6	6	4	5	3	5	6	6	3.4	284.52	2540	6	9	3	7	8	7	1.7	2.2	1.3	2.2	2.9	2.9	7.88721	7.65091	7.51008	7.98747	7.67163	7.70077	7.74377	7.56631	7.26937	8.0235
2125	O95248-4;G5E933;O95248;H0Y5W8;C9JNC1	Myotubularin-related protein 5	SBF1	0.299166	-0.330214	-0.62938	no	no	5.1412e-46	356490000	6	5	3	5	3	5	3	4	2	4	2	4	2	3	4.4	211.05	1893	4	6	3	5	6	6	2.1	4.2	2.1	3.9	2.1	3.5	7.2058	6.97179	6.8255	8.21482	7.81971	7.99108	7.33576	7.12369	6.92274	7.50195
2144	Q969F9;G5E9V4;Q969F9-2	Hermansky-Pudlak syndrome 3 protein	HPS3	0.29875	0.264253	-0.0344974	no	no	4.5644e-29	270750000	7	7	4	3	3	5	4	3	4	3	3	5	4	3	9.3	113.73	1004	6	7	4	10	10	5	4.6	3.6	3.6	7.3	4.6	3.5	7.47197	7.28625	7.01347	7.56179	7.28731	7.23249	7.51591	7.31296	7.08799	7.783
426	P49815;P49815-4;P49815-2;P49815-3;E9PGN1;P49815-5;B4DIL8;P49815-6;C9JWX6;C9JX95	Tuberin	TSC2	0.298632	-0.147307	-0.445939	no	no	2.0361e-88	269050000	7	7	4	3	2	4	3	3	4	3	2	4	3	3	5.8	200.61	1807	6	4	3	8	4	3	3.8	2	2	3.2	2	2.8	7.76235	7.58461	7.2885	7.57378	7.26307	7.28224	7.5742	7.42002	7.04964	7.85865
5982	Q9BYK8;Q9BYK8-4;Q9BYK8-2	Peroxisomal proliferator-activated receptor A-interacting complex 285 kDa protein	PRIC285	0.298191	0.798266	0.500075	no	no	5.9524e-24	200570000	5	5	3	2	3	2	2	2	3	2	3	2	2	2	3.6	294.65	2649	3	3	4	4	2	3	2.3	1.1	1.9	1.1	1.1	1.1	7.39171	7.26956	6.78125	7.49566	7.33476	6.98643	7.66027	7.49004	7.17117	7.74892
6667	Q9UKU9;Q8NCH7;Q8NI99	Angiopoietin-related protein 2	ANGPTL2	0.297973	0.140412	-0.157561	no	no	4.0013e-08	136110000	3	3	2	3	3	2	2	2	2	3	3	2	2	2	5.5	57.104	493	11	8	9	7	5	9	3.2	5.5	5.5	3.2	3.2	3.2	7.33218	7.14894	6.869	7.09871	6.86331	6.72038	7.66569	7.36033	7.36896	7.10622
2130	P51784;G5E9A6	Ubiquitin carboxyl-terminal hydrolase 11;Ubiquitin carboxyl-terminal hydrolase	USP11	0.297967	0.321603	0.0236364	no	no	5.4469e-50	342240000	5	4	5	4	5	4	5	4	4	3	4	3	4	3	9.8	109.82	963	4	3	4	4	4	4	9.8	7.6	9.8	7.2	9.8	7.6	7.65352	7.46121	7.20712	7.42906	7.27816	6.89672	7.8982	7.6884	7.48154	7.7905
4031	Q01968;A6NNH7;Q01968-2	Inositol polyphosphate 5-phosphatase OCRL-1	OCRL	0.296942	-0.245861	-0.542803	no	no	3.9955e-38	703120000	10	10	5	7	6	7	6	5	5	7	6	7	6	5	17	104.2	901	8	9	9	9	7	7	8.3	12.2	9.5	12.2	8.8	7.5	7.86	7.61644	7.49272	8.16938	7.84525	7.89026	8.13261	7.92759	7.70812	8.03214
5012	Q86V48;Q86V48-3;Q86V48-2;E5RFK8;E5RHU7	Leucine zipper protein 1	LUZP1	0.29692	-0.12499	-0.42191	no	no	0	9255900000	32	32	25	26	26	26	25	22	25	26	26	26	25	22	34.4	120.27	1076	60	60	58	59	61	57	23.7	28.5	28.5	30	28.1	22.7	9.14993	8.93354	8.74368	9.16761	8.88338	8.84911	9.22492	9.01005	8.81627	9.21365
3225	P22681;Q13191;Q13191-2;B5MC15;Q13191-3	E3 ubiquitin-protein ligase CBL	CBL	0.296778	0.0694065	-0.227371	no	no	8.7818e-75	1134500000	12	10	6	7	6	7	8	8	5	6	5	6	6	7	16.4	99.632	906	4	7	7	7	10	9	9.1	10.2	8.3	10.5	11.7	12.9	8.02539	7.81166	7.61497	8.19932	7.93414	7.8592	8.15606	7.95867	7.71861	8.36663
6150	Q9H792;H0YN99	Pseudopodium-enriched atypical kinase 1	PEAK1	0.296533	-0.0859685	-0.382501	no	no	3.0901e-24	422520000	4	4	3	2	3	4	3	2	3	2	3	4	3	2	2.7	193.1	1746	9	5	6	9	7	7	2.3	1.8	2.3	2.7	2.3	1.8	7.90302	7.68818	7.49436	7.61322	7.32284	7.30127	7.82088	7.62381	7.3829	7.94408
4637	Q5K651;C9JKF1	Sterile alpha motif domain-containing protein 9	SAMD9	0.295997	-0.0654344	-0.361432	no	no	4.5935e-91	1422500000	11	11	6	9	6	7	8	8	6	9	6	7	8	8	10.6	184.28	1589	10	13	6	9	10	11	5.3	9	6.8	6.4	7.9	8.9	8.25462	8.07185	7.79057	8.37099	8.13516	7.99322	8.31277	8.11344	7.87875	8.41691
2569	O60701;O60701-2;B4DN25;E7EV97;E7ETF4;E7ER83;E7ER95;E9PBD2;D6RHF4	UDP-glucose 6-dehydrogenase	UGDH	0.295547	-0.237319	-0.532865	no	no	6.7004e-266	24810000000	22	22	21	19	21	20	20	19	21	19	21	20	20	19	61.9	55.023	494	81	81	82	73	77	78	55.9	53.4	57.9	57.5	57.5	55.5	9.61686	9.40248	9.20747	9.55414	9.26642	9.23937	9.68189	9.46565	9.2754	9.51057
4680	Q5T5C0;Q5T5C0-2;Q5T5C0-3;Q3B794;E9PD85;Q5JRH0	Syntaxin-binding protein 5	STXBP5	0.295491	-0.0790197	-0.374511	no	no	3.2983e-28	740740000	6	6	3	4	2	4	4	5	3	4	2	4	4	5	9	127.57	1151	11	9	6	10	10	9	4.6	6.8	2.6	5.9	5.9	6.9	7.9509	7.76779	7.48748	8.06688	7.78372	7.74723	7.4699	7.25749	7.05744	8.27866
6784	Q9Y2A7-2;Q9Y2A7;P55160;F8W050	Nck-associated protein 1	NCKAP1	0.294626	-0.196355	-0.490981	no	no	0	15944000000	38	38	30	32	31	30	33	32	30	32	31	30	33	32	40.1	129.52	1134	75	93	72	74	89	77	29.8	33.2	33.9	32.6	34.4	35.5	9.32379	9.08232	8.95374	9.44753	9.14176	9.15119	9.42579	9.22427	8.99547	9.31614
5973	Q9BYB4	Guanine nucleotide-binding protein subunit beta-like protein 1	GNB1L	0.294074	-0.298658	-0.592732	no	no	1.4111e-12	437460000	1	1	1	1	1	1	1	1	1	1	1	1	1	1	5.2	35.618	327	5	4	4	5	4	5	5.2	5.2	5.2	5.2	5.2	5.2	7.81997	7.57797	7.4506	7.64097	7.25093	7.41377	8.06032	7.8367	7.66503	7.8162
5174	Q8N4C8;Q8N4C8-4;Q8N4C8-3;Q8N4C8-2;Q8N4C8-5	Misshapen-like kinase 1	MINK1	0.293708	-0.415759	-0.709467	no	no	2.1573e-93	273770000	11	3	8	9	8	9	10	9	2	2	2	2	3	2	7.4	149.82	1332	2	3	3	2	4	4	6.2	6.8	6.2	6.9	6.9	6.9	7.43824	7.15076	7.12323	7.38471	7.07007	7.09688	7.55365	7.30893	7.18792	7.83225
124	A6NMH8;E9PIF1;P60033;H0YDJ9;H0YDL9;E9PRJ8;E9PJK1;H0YEE2;E9PM31	CD81 antigen	CD81	0.293565	-0.379177	-0.672742	no	no	1.4336e-110	3359500000	5	5	4	3	4	3	3	5	4	3	4	3	3	5	26.6	29.806	274	12	12	14	13	8	12	24.5	21.5	24.5	21.5	21.5	26.6	8.64115	8.39742	8.27411	8.79341	8.48174	8.50277	8.85089	8.61225	8.47698	8.78199
6919	Q9Y5S2;H0YLY0;Q86TR8;H0YLR5;REV__Q01118;REV__C9JW43;REV__F8WD82;Q09013-1;Q09013-6;Q09013-16;Q09013;Q09013-15;Q09013-11;E9PBC4;Q09013-7;Q09013-5;Q09013-8;Q09013-2;Q09013-10;Q09013-12	Serine/threonine-protein kinase MRCK beta	CDC42BPB	0.293482	0.0438542	-0.249627	no	no	1.1206e-274	7213500000	36	32	27	24	29	29	30	29	24	21	25	26	27	26	27.1	194.31	1711	58	56	57	60	62	62	21	18.8	21.9	22.4	23.3	21.9	9.0267	8.81886	8.60686	8.93693	8.67758	8.58979	9.18007	8.99235	8.72529	9.06356
2916	P06241;P06241-2;P06241-3;B3KPS6;Q5R3A8;E5RFS5;E5RIX5;E5RH71;P09769;E5RGT0;E5RFM0;E5RI25;E5RGM6;P06239-3;E7EN21;Q573B4;P06239;Q5TGY6;E5RHX7;E5RHF7;E5RFM4	Tyrosine-protein kinase Fyn	FYN	0.293441	-0.402286	-0.695727	no	no	6.5903e-82	2648500000	12	7	8	6	8	11	9	8	4	4	5	6	5	4	28.9	60.761	537	24	23	30	28	31	25	18.6	15.1	20.9	25.1	22.3	18.6	8.61521	8.38419	8.23068	8.52252	8.21937	8.22357	8.70698	8.45629	8.34901	8.69242
128	Q9BY41;E7ENE4;Q9BY41-2;B4DV22;A6NMT1;E7EVA8;E7EW22;C9J8F0;B4DKN0;A6NGJ7;Q9BY41-3;A6ND12;A6NGT0;A6NJR3	Histone deacetylase 8	HDAC8	0.293368	-0.17412	-0.467488	no	no	4.8811e-24	111100000	3	3	3	1	0	2	2	2	3	1	0	2	2	2	16.7	41.757	377	5	3	0	5	3	2	16.7	5	0	10.6	10.6	10.6	7.56263	7.27166	7.2513	6.95573	6.62906	6.6789	NaN	NaN	NaN	7.39417
855	B9EGG0;Q4KMQ2;E9PB30;E9PCT2	Anoctamin-6	ANO6	0.293107	-0.562963	-0.856069	no	no	4.849e-106	4786600000	14	14	11	12	12	8	10	11	11	12	12	8	10	11	22.1	108.43	931	24	25	21	19	21	22	15.8	17.7	20.3	12.4	14.9	15.5	8.87891	8.61652	8.53546	8.993	8.6494	8.73073	8.93325	8.69887	8.55345	8.79547
2168	G8JLJ4;Q6NYC8;F8WBK4;Q6NYC8-2	Phostensin	PPP1R18	0.292982	0.281772	-0.0112093	no	no	2.5882e-80	1686000000	8	8	7	6	8	4	3	3	7	6	8	4	3	3	17	68.041	613	10	10	13	8	7	6	15.5	13.7	17	10	7	5.7	8.34899	8.13437	7.93996	8.70629	8.19195	8.54768	8.2052	8.01106	7.76213	8.13114
5704	Q96PV6-2;E7EQP8;F8W9Q9;Q96PV6	Leukocyte receptor cluster member 8	LENG8	0.292864	-0.16092	-0.453785	no	no	1.6035e-07	104600000	2	2	2	2	2	2	2	1	2	2	2	2	2	1	5.8	88.156	800	3	3	4	3	5	1	5.8	5.8	5.8	5.8	5.8	2	7.55467	7.36137	7.11005	6.83047	6.44957	6.59687	7.43274	7.21149	7.03391	7.03579
4979	Q86SF2;H0YAH3;H0YAK0;E9PBY3	N-acetylgalactosaminyltransferase 7	GALNT7	0.291971	0.512081	0.22011	no	no	9.1256e-101	3056500000	17	15	10	11	12	10	9	12	9	9	10	9	8	11	35.9	75.388	657	17	22	20	21	20	22	24.2	25.7	28	19.5	21.9	24.8	8.6557	8.51188	8.10582	8.62713	8.41322	8.21701	8.74264	8.60182	8.18498	8.73592
4105	Q08AF3;B4E128;Q08AF3-2	Schlafen family member 5	SLFN5	0.291257	0.665088	0.373832	no	no	2.9446e-44	545250000	7	6	4	5	5	5	4	4	3	4	4	4	3	3	10.4	101.05	891	6	8	7	5	6	6	5.4	7	7.5	7	5.4	5.4	7.83746	7.67962	7.32137	8.14408	7.94687	7.70632	8.01557	7.88923	7.41764	7.77341
62	Q9BVK2;A6NDW6;E9PP96;E9PK79;E9PNE2;H0YDD3;E9PP80;E9PP04;E9PLP7;H0YDQ1	Probable dolichyl pyrophosphate Glc1Man9GlcNAc2 alpha-1,3-glucosyltransferase	ALG8	0.291222	0.023387	-0.267835	no	no	3.6539e-23	636510000	2	2	2	2	2	2	2	1	2	2	2	2	2	1	5.1	60.087	526	3	2	3	5	3	2	5.1	5.1	5.1	5.1	5.1	3.4	8.0503	7.85777	7.60433	7.98609	7.73678	7.62634	8.15679	7.94667	7.74066	8.05092
3075	P13807;Q9BTT9;B7Z806;F5H1N8;F5H3S3;C9IYM4;P54840	Glycogen [starch] synthase, muscle	GYS1	0.290797	0.410198	0.119401	no	no	2.3447e-170	4225200000	15	15	12	11	11	8	8	10	12	11	11	8	8	10	25.5	83.785	737	24	26	25	23	20	26	20.4	19.4	20.5	15.1	15.1	17.9	8.8793	8.66804	8.46498	8.79891	8.59959	8.36481	8.89752	8.72573	8.41164	8.8893
4335	Q14699;G3XAJ6;C9JHG2;C9JRN3;F8WAR1;C9JWQ9	Raftlin	RFTN1	0.290721	0.173824	-0.116897	no	no	4.9376e-193	3184200000	9	9	6	8	9	7	6	6	6	8	9	7	6	6	28.2	63.145	578	20	22	23	22	19	17	21.3	22.8	28.2	24.2	18.9	20.8	8.71661	8.5355	8.24939	8.68396	8.46437	8.2826	8.85944	8.67158	8.40494	8.67121
819	Q15020;B7ZKM0;F5H0B8;E7EMI4;Q15020-2;F8W667;H0YHU8;F8VZM2;F8VVK9;Q15020-3	Squamous cell carcinoma antigen recognized by T-cells 3	SART3	0.289865	0.0231085	-0.266757	no	no	0	4090100000	30	11	24	23	21	23	25	22	8	8	7	8	8	7	33.5	109.93	963	23	23	23	24	24	21	27.5	24.1	20.7	25.3	28.3	22.5	8.78137	8.59329	8.3273	8.69664	8.43257	8.35522	8.79269	8.59863	8.34941	8.79161
6230	Q9HD20;Q9HD20-2;Q9HD20-3	Probable cation-transporting ATPase 13A1	ATP13A1	0.289566	0.113754	-0.175812	no	no	7.1083e-107	2665900000	16	16	11	9	10	11	9	12	11	9	10	11	9	12	18.4	132.95	1204	18	20	17	20	18	23	12.9	10.3	11.4	12.8	10.4	14	8.53569	8.32257	8.12434	8.65994	8.4042	8.30835	8.69977	8.43112	8.36374	8.57947
3260	P24530-3;P24530;P24530-2	Endothelin B receptor	EDNRB	0.289216	-0.888383	-1.1776	no	no	1.3822e-10	291300000	1	1	1	1	1	1	1	1	1	1	1	1	1	1	2.6	59.48	532	7	7	4	4	8	5	2.6	2.6	2.6	2.6	2.6	2.6	7.55178	7.23535	7.2656	7.83222	7.50235	7.55824	7.74263	7.4024	7.47756	7.45972
5423	Q92508	Piezo-type mechanosensitive ion channel component 1	PIEZO1	0.287619	0.149329	-0.13829	no	no	1.2331e-100	1281100000	10	10	7	6	9	5	9	8	7	6	9	5	9	8	5.7	286.79	2521	9	8	11	7	11	9	4.6	3.3	5.2	3.5	5.2	4.7	8.29563	8.11687	7.82383	8.08895	7.86399	7.6956	8.38947	8.21561	7.90783	8.30244
2067	G3V1K3;Q15165;Q15165-1;Q15165-3;G3XAK4	Serum paraoxonase/arylesterase 2	PON2	0.287094	0.37825	0.0911564	no	no	5.8612e-164	4841800000	11	11	8	8	7	9	7	8	8	8	7	9	7	8	46.1	41.527	375	27	24	21	21	16	23	34.4	36.8	34.4	38.1	34.4	36.8	8.88313	8.72212	8.3742	8.90622	8.68314	8.5101	8.86804	8.70512	8.36331	8.92805
920	C9J837;Q15042;A6H8Z3;C9J1R5;Q15042-2	Rab3 GTPase-activating protein catalytic subunit	RAB3GAP1	0.28699	-0.00201834	-0.289008	no	no	2.1788e-293	3763600000	25	25	15	16	18	15	16	19	15	16	18	15	16	19	31	111.28	988	31	37	35	29	33	40	18.1	21.9	22.5	19.9	19.3	22.7	8.66501	8.46512	8.23193	8.78302	8.51191	8.44985	8.87174	8.67117	8.43979	8.70614
4689	Q5T7W0;Q5T7W0-2;B5MDS3;Q5T7W0-3;B1ALC2	Zinc finger protein 618	ZNF618	0.286602	-0.943659	-1.23026	no	no	2.686e-33	315330000	6	6	5	2	3	1	4	3	5	2	3	1	4	3	11.1	104.95	954	5	2	3	1	4	3	8.7	3.6	6	1.5	8.5	6	7.93462	7.60452	7.66083	7.54412	7.16429	7.30976	7.78165	7.4864	7.47478	7.55736
2521	O43861;O43861-2;F5H8J1;B3KSI8	Probable phospholipid-transporting ATPase IIB	ATP9B	0.286484	0.0770106	-0.209473	no	no	1.8524e-39	148550000	3	1	2	3	2	2	2	3	1	1	1	1	1	1	3.7	129.3	1147	2	2	2	2	2	1	2.7	3.7	2.7	2.7	2.7	3.7	7.26512	7.10653	6.75071	7.24227	6.99719	6.87699	7.39548	7.24185	6.86967	7.50258
2556	O60503	Adenylate cyclase type 9	ADCY9	0.286339	-0.314406	-0.600746	no	no	4.1279e-24	199430000	4	4	1	3	3	2	3	4	1	3	3	2	3	4	3.9	150.7	1353	2	6	4	3	5	5	1.2	3.3	3.3	2.7	3.3	3.9	6.89561	6.60661	6.58221	7.30166	6.99053	7.01051	7.49517	7.25135	7.12824	7.44606
5532	Q96BM9	ADP-ribosylation factor-like protein 8A	ARL8A	0.285854	-0.133037	-0.418892	no	no	2.7302e-133	1512600000	9	3	7	9	9	9	8	9	2	3	3	3	3	3	53.2	21.416	186	6	11	10	8	10	13	43.5	53.2	53.2	53.2	53.2	53.2	8.04599	7.84251	7.61892	8.36853	8.09923	8.03326	8.39277	8.17632	7.98658	8.26647
1190	D6REX3;O94979-8;O94979;O94979-2;O94979-3;O94979-4;B7ZL00;O94979-6;D6RHZ5;O94979-7;O94979-5;H0YAB3;H0Y8V7;H0Y9K1;H0Y8W8;H0Y9T9;H0YAF5;D6RCQ9;D6RE64;D6RHE8;D6RBT0;H0Y9V3	Protein transport protein Sec31A	SEC31A	0.285567	0.0476367	-0.237931	no	no	2.0087e-253	24258000000	38	38	28	33	33	30	32	31	28	33	33	30	32	31	38	136.22	1251	69	81	81	70	74	78	24.5	31	32.8	31.1	28.9	30.2	9.53065	9.34207	9.07748	9.64947	9.3962	9.29477	9.63505	9.45079	9.17383	9.5175
3986	P86790;P86791;F5H553;F8WD66	Vacuolar fusion protein CCZ1 homolog B;Vacuolar fusion protein CCZ1 homolog	CCZ1B;CCZ1	0.285538	0.194278	-0.0912598	no	no	2.5341e-27	1299900000	6	6	5	4	6	4	5	5	5	4	6	4	5	5	15.4	55.866	482	9	8	11	9	10	7	13.3	10.4	15.4	10.4	12.4	12.4	7.98945	7.7867	7.5612	7.89192	7.66575	7.50037	8.11428	7.94512	7.62299	8.42612
2455	O43149;O43149-3;O43149-2	Zinc finger ZZ-type and EF-hand domain-containing protein 1	ZZEF1	0.28531	0.40316	0.11785	no	no	1.8783e-189	2546800000	20	20	13	13	12	11	13	13	13	13	12	11	13	13	10.4	331.07	2961	20	20	19	15	22	21	6.1	7.2	5.9	5.7	7.4	7.2	8.61599	8.46617	8.08102	8.51029	8.31521	8.06882	8.6887	8.5538	8.11524	8.73402
3445	P36969;P36969-2	Phospholipid hydroperoxide glutathione peroxidase, mitochondrial	GPX4	0.285049	2.02997	1.74492	no	no	7.5848e-67	1744400000	10	10	8	8	9	7	5	7	8	8	9	7	5	7	49.2	22.192	197	16	15	16	14	11	13	41.6	41.6	48.2	36	28.4	37.6	8.43345	8.36246	7.61185	8.51847	8.43868	7.74332	8.58274	8.50897	7.77649	8.44415
5344	Q8TED1;E7ETY7	Probable glutathione peroxidase 8;Glutathione peroxidase	GPX8	0.284356	-0.123269	-0.407625	no	no	1.9729e-122	5862500000	11	11	9	7	11	6	8	11	9	7	11	6	8	11	52.6	23.881	209	14	16	19	13	17	18	44.5	37.8	52.6	33	44.5	52.6	8.89348	8.72121	8.40861	9.01161	8.76691	8.6458	8.99497	8.79034	8.56984	8.87158
5170	Q8N3V7-2;Q8N3V7;Q8N3V7-3	Synaptopodin	SYNPO	0.28384	0.297378	0.013538	no	no	1.5028e-122	3297600000	19	19	10	9	14	10	7	12	10	9	14	10	7	12	28.7	96.395	903	17	13	23	13	11	15	16.1	13.4	22.3	15.1	11.8	17.1	8.6969	8.5129	8.23517	8.78196	8.55093	8.39744	8.84533	8.68474	8.33546	8.58994
4319	Q14554;Q9BV43;C9JY10	Protein disulfide-isomerase A5	PDIA5	0.283446	-0.0119249	-0.29537	no	no	3.3053e-295	15347000000	23	23	18	20	19	18	16	20	18	20	19	18	16	20	43	59.594	519	76	71	68	73	61	69	37	38.3	36.2	32.6	34.3	35.8	9.32948	9.11687	8.9173	9.40463	9.14752	9.05473	9.45074	9.25198	9.01569	9.27012
6509	Q9P265;Q9Y2E4;B4DPI5	Disco-interacting protein 2 homolog B	DIP2B	0.28224	-0.195852	-0.478092	no	no	8.4388e-36	917890000	9	8	5	5	5	5	6	5	4	4	4	4	5	5	9.6	171.49	1576	6	8	7	6	8	11	6.3	7.1	7.1	5.9	7	6	8.04379	7.81791	7.65182	8.07441	7.78667	7.75965	8.19537	8.00191	7.75102	8.16879
2688	O75962;O75962-4;O75962-2;O75962-5;E7EPJ7;E7EWP2;F5H228;O75962-3;F5H216;O60229;O60229-2;C9IZQ6;O60229-3	Triple functional domain protein	TRIO	0.282169	0.0307224	-0.251447	no	no	2.3623e-166	2812300000	28	27	18	17	16	14	14	15	18	16	16	14	14	15	14.8	346.9	3097	40	43	40	39	38	33	8.6	8.1	8.3	7.1	6.7	7.2	8.6539	8.47169	8.18876	8.6131	8.35212	8.26795	8.79152	8.5915	8.35862	8.64509
3666	P51531;P51531-2;F6VDE0;B1ALF6;F6XG14;F6XE55;B1ALG2;B1ALG1;F6UH26;F6XDY1	Probable global transcription activator SNF2L2	SMARCA2	0.282146	-0.18409	-0.466236	no	no	1.5528e-135	509890000	21	9	12	16	16	13	16	13	5	6	6	5	7	5	15.2	181.28	1590	8	7	11	7	8	5	7.9	10.8	11.2	8.2	10.9	9.8	7.93885	7.69502	7.57193	7.86214	7.52208	7.59692	8.12057	7.90396	7.71471	7.9307
3615	P49754;P49754-2;E9PF36;C9JU58;C9J3F8;C9JZ11;C9J2U9	Vacuolar protein sorting-associated protein 41 homolog	VPS41	0.282045	0.0608486	-0.221196	no	no	5.5812e-74	1215500000	10	10	6	8	8	8	7	8	6	8	8	8	7	8	15.2	98.565	854	13	17	13	16	12	14	8.8	12.2	12.5	11.5	9.7	12.2	8.08465	7.88178	7.65656	8.31148	8.07606	7.93311	8.49436	8.29188	8.06565	8.31781
6945	Q9Y678;F5GXH1;H0Y8X7;D6RG17;H0Y8G2	Coatomer subunit gamma-1	COPG1	0.281734	0.183179	-0.0985544	no	no	0	51457000000	39	36	31	34	33	36	35	33	29	32	31	33	33	31	59.8	97.717	874	118	120	117	109	122	119	47.3	52.6	49.2	55.6	53.4	50.6	9.85977	9.69771	9.35317	9.87363	9.6499	9.47851	10.01	9.85097	9.49667	9.8692
4764	Q68CR1;Q68CR1-2;Q68CR1-3	Protein sel-1 homolog 3	SEL1L3	0.281658	-0.0483203	-0.329979	no	no	7.9728e-61	125370000	5	5	3	2	1	2	2	1	3	2	1	2	2	1	8.5	128.57	1132	3	2	1	2	2	1	4.8	3.7	2.5	2.4	3.7	2.5	7.04442	6.87467	6.55431	7.51805	7.22034	7.21368	7.2349	7.028	6.81348	7.3898
672	Q9HCU5;B5MC98	Prolactin regulatory element-binding protein	PREB	0.281658	0.22452	-0.0571383	no	no	2.7561e-29	659130000	3	3	2	2	1	2	1	2	2	2	1	2	1	2	11.5	45.468	417	3	6	3	4	5	5	7.2	7.2	3.8	8.2	3.8	7.2	8.04747	7.96593	7.28092	8.32311	8.16587	7.80564	7.50465	7.36203	6.95166	7.54296
4872	Q6Y288	Beta-1,3-glucosyltransferase	B3GALTL	0.281008	0.45038	0.169372	no	no	1.2655e-82	1516000000	6	6	3	5	6	5	4	4	3	5	6	5	4	4	18.5	56.563	498	9	19	15	10	14	14	8.8	18.5	18.5	18.5	11.8	15.5	8.20704	8.05759	7.67112	8.46127	8.25566	8.03778	8.47119	8.32399	7.92978	7.98848
5864	Q9BS26	Endoplasmic reticulum resident protein 44	ERP44	0.280782	0.233244	-0.0475383	no	no	3.301e-138	11242000000	14	14	12	13	12	11	11	10	12	13	12	11	11	10	41.4	46.971	406	32	43	41	32	35	32	36	38.9	36	36	33.5	30	9.11029	8.93732	8.62682	9.31498	9.07875	8.93778	9.35313	9.19676	8.83361	9.22601
6794	Q9Y2H2;Q9Y2H2-2;Q9Y2H2-3;Q5W135;Q5T993	Phosphatidylinositide phosphatase SAC2	INPP5F	0.280701	-0.081067	-0.361768	no	no	1.686e-37	739240000	9	9	5	8	5	7	7	8	5	8	5	7	7	8	10.9	128.41	1132	9	10	6	9	10	15	6.8	10	7.9	9.2	8.1	10	7.82685	7.55683	7.49241	7.78962	7.4955	7.48156	7.84634	7.62334	7.45011	8.11257
6033	Q9GZS1;Q9GZS1-2;B4DW33;E7EX70	DNA-directed RNA polymerase I subunit RPA49	POLR1E	0.28039	-0.053606	-0.333996	no	no	1.1235e-11	629960000	5	5	2	2	1	2	4	3	2	2	1	2	4	3	16.2	53.961	481	2	2	1	2	3	2	10.2	10.2	2.9	10.2	13.3	10.4	8.03691	7.84019	7.59828	7.98441	7.71584	7.64829	7.6418	7.42215	7.24055	7.99948
3220	P22314;E7ERL1;B4DDE4;Q5JRR6;Q5JRS0;Q5JRR9;Q5JRS2;Q5JRS3;Q5JRS1	Ubiquitin-like modifier-activating enzyme 1	UBA1	0.280361	-0.273098	-0.553459	no	no	0	70456000000	40	40	33	34	36	34	37	35	33	34	36	34	37	35	49.7	117.85	1058	118	119	112	110	110	109	39.1	40.8	44.2	43.1	43.5	42	10.0398	9.79296	9.67689	10.0336	9.73999	9.72505	10.1195	9.8884	9.73501	9.94226
1024	Q16134;C9JT69;D6RAD5	Electron transfer flavoprotein-ubiquinone oxidoreductase, mitochondrial	ETFDH	0.280355	0.44971	0.169355	no	no	2.3178e-17	720400000	5	5	3	5	3	4	4	3	3	5	3	4	4	3	13.1	68.495	617	8	9	8	8	9	8	4.7	13.1	4.7	6.6	6.6	4.7	8.00898	7.84887	7.49808	8.15863	7.90919	7.79904	8.06536	7.82156	7.6984	8.04614
1241	E9PBM3;P51825;E7EMS5;E7EMC5;E7ETI4;D6RIZ5	AF4/FMR2 family member 1	AFF1	0.280315	-0.497473	-0.777788	no	no	1.4887e-06	63358000	3	3	2	2	1	1	1	2	2	2	1	1	1	2	2.1	132.38	1218	2	3	1	2	1	2	1.5	1.5	1	1	1	1.6	7.20382	6.93768	6.86484	6.95654	6.61053	6.69627	6.6362	6.29416	6.37264	6.84054
1242	O43318;O43318-2;O43318-3;O43318-4;E7EMD4	Mitogen-activated protein kinase kinase kinase 7	MAP3K7	0.280128	0.255667	-0.0244615	no	no	1.2071e-14	139490000	2	2	1	1	1	1	1	2	1	1	1	1	1	2	6.1	67.195	606	3	2	2	3	4	3	3.1	3.1	3.1	3.1	3.1	6.1	7.34296	7.14236	6.91105	7.06461	6.86068	6.63837	7.15788	7.00307	6.63483	7.25208
4197	Q13247;Q13247-3;Q13247-2	Serine/arginine-rich splicing factor 6	SRSF6	0.279879	0.175811	-0.104068	no	no	4.6022e-65	3668200000	13	8	11	11	10	11	10	11	6	6	5	6	5	6	33.1	39.586	344	21	25	22	22	22	21	27.6	28.5	25	27	25	28.5	8.69278	8.50922	8.23022	8.95863	8.7156	8.59063	8.8095	8.63778	8.32352	8.55902
4995	Q86TV6-2;Q86TV6;G3V3H1;F5GWK1;Q6PIF1;H0YJS2;H0YJP9;G3V3E4	Tetratricopeptide repeat protein 7B	TTC7B	0.279389	-0.268554	-0.547943	no	no	8.0475e-64	5534800000	7	7	3	4	3	3	3	7	3	4	3	3	3	7	9.7	96.046	860	13	13	11	13	11	14	4.3	6.2	4.3	4.3	4.3	9.7	8.79275	8.71262	8.01928	8.7851	8.68087	8.11424	9.11657	9.06729	8.14709	8.74201
5803	Q99798;A2A274;F5H2A5;B4DEC3;B4DW08	Aconitate hydratase, mitochondrial	ACO2	0.279224	-0.0521377	-0.331361	no	no	0	38625000000	39	39	34	34	36	35	33	31	34	34	36	35	33	31	62.1	85.424	780	116	112	117	104	105	104	59.9	58.3	60.3	59.1	56.4	52.6	9.75034	9.55462	9.30999	9.75544	9.48613	9.42019	9.90123	9.71285	9.44769	9.67478
4908	Q7L273	BTB/POZ domain-containing protein KCTD9	KCTD9	0.279217	0.623169	0.343952	no	no	1.2587e-07	131200000	1	1	1	1	1	1	1	1	1	1	1	1	1	1	3.3	42.566	389	1	2	2	2	2	3	3.3	3.3	3.3	3.3	3.3	3.3	6.82291	6.68584	6.25532	7.35765	7.20914	6.81952	7.29104	7.16953	6.67854	7.3575
6596	Q9UHD2;F5H1A3;F5H206	Serine/threonine-protein kinase TBK1	TBK1	0.278613	-0.226262	-0.504875	no	no	9.3776e-90	1748800000	17	17	9	8	8	8	12	11	9	8	8	8	12	11	33.5	83.641	729	18	16	19	17	22	20	16.9	13.6	15.9	16.6	25.2	21.7	8.35837	8.14173	7.95251	8.33147	8.0235	8.03727	8.36369	8.14445	7.96182	8.35606
111	Q8IYS2-2;A6NJM2;Q8IYS2	Uncharacterized protein KIAA2013	KIAA2013	0.278574	0.0289464	-0.249627	no	no	5.0649e-34	175330000	4	4	3	2	1	1	3	2	3	2	1	1	3	2	9.4	72.68	667	3	2	1	3	3	2	7.6	6.4	4.6	4.6	7.5	5.7	7.52077	7.3326	7.06681	7.35919	7.12313	6.98172	7.03615	6.81366	6.63913	7.68846
4935	Q7Z2W4;C9J6P4;Q7Z2W4-2;F5H1W0;Q7Z2W4-4;Q7Z2W4-3;Q7Z2W4-5	Zinc finger CCCH-type antiviral protein 1	ZC3HAV1	0.277915	0.182328	-0.095587	no	no	0	24062000000	27	27	25	22	23	21	22	24	25	22	23	21	22	24	35.6	101.43	902	84	79	73	80	80	76	34.4	29.5	31.9	29.9	30.4	31.6	9.6065	9.43225	9.12568	9.52029	9.28187	9.1461	9.55381	9.39684	9.03571	9.61244
6020	Q9C0D5-2;Q9C0D5	Protein TANC1	TANC1	0.277722	-0.385486	-0.663208	no	no	3.9859e-154	4464500000	29	29	17	17	15	17	19	17	17	17	15	17	19	17	22.6	191.43	1755	33	35	27	32	41	28	14.6	13.4	11.7	14.1	16.2	12.6	8.70166	8.4416	8.35539	8.89517	8.52524	8.65359	8.82447	8.58644	8.44973	8.78308
3598	P49419;P49419-2;E7EPT3;F8VS02;H0YHM6;P49419-3;F8VVF2;F8WD33;F8WDY6	Alpha-aminoadipic semialdehyde dehydrogenase	ALDH7A1	0.277174	-0.490057	-0.767231	no	no	4.9805e-164	12446000000	15	15	13	14	12	11	11	10	13	14	12	11	11	10	40.8	58.486	539	31	36	28	26	29	25	38.2	40.6	35.4	33.4	32.8	32.1	9.24015	8.93042	8.94762	9.36797	8.99163	9.13111	9.36834	9.0799	9.05434	9.1865
5529	Q96B67	Arrestin domain-containing protein 3	ARRDC3	0.276999	-1.19937	-1.47637	no	no	5.2046e-45	93326000	2	2	2	2	1	0	1	2	2	2	1	0	1	2	11.1	46.394	414	2	5	2	0	2	3	11.1	11.1	5.8	0	5.8	11.1	7.07207	6.64345	6.8695	7.46651	7.00864	7.28046	7.27671	6.87348	7.05835	NaN
956	Q5W0V3;C9JEP3;Q5W0V3-2;Q5W0V4;Q5W0V1	Protein FAM160B1	FAM160B1	0.276926	-0.165301	-0.442227	no	no	1.1495e-78	3549900000	8	8	7	7	7	6	6	6	7	7	7	6	6	6	14.2	86.557	765	22	23	25	17	24	17	14.2	14.2	12.4	12.2	12.4	10.3	8.7576	8.55908	8.32214	8.68158	8.40226	8.35769	8.90424	8.69159	8.49215	8.75772
1441	E9PAL9;C9JTZ6;Q9H857-2;Q9H857;Q9H857-3;Q9H857-4;C9J036	5-nucleotidase domain-containing protein 2	NT5DC2	0.276747	0.229907	-0.0468402	no	no	7.1579e-59	2160500000	13	13	7	8	7	9	8	10	7	8	7	9	8	10	32	64.144	557	22	19	16	16	18	16	19.9	19.4	15.1	21.4	19.6	26.6	8.50995	8.33642	8.02768	8.57866	8.33939	8.20561	8.51375	8.34252	8.02674	8.47441
77	Q8TCT7;Q8TCT7-4;C9JFE6;Q8TCT7-2;A6NFV1;Q8TCT7-3	Signal peptide peptidase-like 2B	SPPL2B	0.274899	-0.0697022	-0.344601	no	no	4.8907e-18	676170000	3	3	3	3	3	3	3	3	3	3	3	3	3	3	7.3	64.643	592	7	6	6	5	6	6	7.3	7.3	7.3	7.3	7.3	7.3	7.97498	7.77516	7.54173	8.09458	7.83636	7.74608	7.82412	7.62681	7.38655	7.90801
5413	Q8WYN0;Q8WYN0-5;Q8WYN0-3;Q8WYN0-2;G5E979;F5H3G3	Cysteine protease ATG4A	ATG4A	0.274574	0.0588337	-0.215741	no	no	2.6437e-28	232960000	4	4	2	3	2	2	2	3	2	3	2	2	2	3	19.3	45.377	398	3	3	2	2	3	3	8.5	13.3	8.5	8.5	8.3	14.3	7.45274	7.23267	7.05208	7.45384	7.22922	7.05998	7.5859	7.3832	7.15755	7.50866
2473	O43294;O43294-2	Transforming growth factor beta-1-induced transcript 1 protein	TGFB1I1	0.274172	0	-0.274172	no	no	3.5629e-85	2296500000	8	8	4	4	6	4	7	3	4	4	6	4	7	3	33.4	49.814	461	10	9	11	12	10	9	17.8	20.8	28.6	17.8	30.6	15	8.38157	8.18718	7.93884	8.40809	8.17108	8.03193	8.65133	8.45665	8.20914	8.65936
2192	O60906;H0Y5N2	Sphingomyelin phosphodiesterase 2	SMPD2	0.273932	0.100933	-0.173	no	no	4.7454e-06	91144000	2	2	2	2	2	2	2	1	2	2	2	2	2	1	8.7	47.645	423	2	4	4	3	4	2	8.7	8.7	8.7	8.7	8.7	3.1	7.13931	6.9631	6.66245	7.13846	6.916	6.74145	7.22554	7.02044	6.80121	7.19587
24	O15533-3;A2AB90;A2ABB9;A8MUD0;D3YTI9;O15533;G5E9H8;O15533-2;G3V0I4;Q6P1N7;C9JA35;E7EV64;E9PGM2;F8VS90	Tapasin	TAPBP	0.273271	-0.286172	-0.559443	no	no	3.0853e-13	1419800000	4	4	1	3	2	2	2	3	1	3	2	2	2	3	12.7	53.943	504	2	4	2	4	3	3	6.3	10.9	8.3	8.3	8.3	10.1	7.73195	7.48222	7.37275	8.59331	8.37885	8.18404	8.28174	8.00805	7.95151	8.27513
6294	Q9NRL2;Q9NRL2-2;F5H239	Bromodomain adjacent to zinc finger domain protein 1A	BAZ1A	0.273034	0.27289	-0.000144301	no	no	7.3709e-98	2312100000	16	16	9	13	11	12	14	11	9	13	11	12	14	11	13.9	178.7	1556	20	20	18	21	22	19	8.1	10.8	10.6	11.2	10.6	9.9	8.47806	8.31683	7.96961	8.47522	8.25169	8.0798	8.69159	8.52613	8.19237	8.66318
3185	P19838-2;P19838;D6RF93;D6RH30	Nuclear factor NF-kappa-B p105 subunit;Nuclear factor NF-kappa-B p50 subunit	NFKB1	0.272765	-0.0589399	-0.331705	no	no	1.0502e-57	1728200000	7	7	4	5	4	5	5	5	4	5	4	5	5	5	12.7	105.43	969	9	10	9	12	11	11	5.8	6.8	5.2	9.5	9.5	6.5	8.41236	8.21804	7.96956	8.55446	8.28405	8.2205	8.4717	8.2823	8.02003	8.29277
5632	Q96HW7;Q96HW7-2;Q96HW7-3;Q2T9F4;Q96LV5;F8WAA7;E9PIM3;Q96HW7-4	Integrator complex subunit 4	INTS4	0.272602	-0.120485	-0.393087	no	no	1.3619e-74	1386600000	7	7	6	6	7	6	6	6	6	6	7	6	6	6	8.7	108.17	963	15	13	15	16	19	18	8.7	8.7	8.7	8.7	8.7	8.7	8.1518	7.94384	7.73218	8.28691	8.03189	7.93442	8.40231	8.18429	7.99858	8.24655
6479	Q9NZN4;F5H559;B4DNU6;F5H1J1;F5GXL2;B7ZAY3;B4DE23	EH domain-containing protein 2	EHD2	0.272599	0.0126936	-0.259905	no	no	0	60467000000	32	27	28	28	31	29	30	30	24	24	27	25	26	25	69.6	61.161	543	97	99	99	97	108	94	63	65.4	69.4	63.2	68.1	67	9.95588	9.76338	9.50983	9.96912	9.7073	9.625	10.1054	9.90626	9.67098	9.87161
4206	Q13330;E7ESY4;Q13330-3;E7EN71;Q13330-2;H0Y4T7;F8VSM3;F8W9Y9;E9PF88;H0YIT0;F8VPC5	Metastasis-associated protein MTA1	MTA1	0.272249	-0.057277	-0.329526	no	no	3.0974e-154	2672500000	19	15	17	15	14	15	17	16	14	12	11	12	13	13	32.4	80.785	715	23	19	19	21	21	20	30.6	25.5	25.3	27.6	29	26.9	8.61752	8.39622	8.21877	8.50047	8.20466	8.19415	8.70479	8.49692	8.28499	8.60964
440	O75494;O75494-2;O75494-3;Q5JRI3;O75494-4;Q5JRI1;B4DJP9;Q8WXF0	Serine/arginine-rich splicing factor 10	SRSF10;FUSIP1	0.271403	0.00524641	-0.266157	no	no	7.8196e-102	10162000000	7	7	6	6	6	5	5	5	6	6	6	5	5	5	20.6	31.3	262	23	22	21	24	23	20	20.6	17.9	17.9	17.9	17.9	17.9	9.18167	8.99839	8.71854	9.11311	8.85635	8.7628	9.38025	9.17831	8.95061	9.21165
3714	P53007;B4DP62	Tricarboxylate transport protein, mitochondrial	SLC25A1	0.271258	-0.675997	-0.947255	no	no	4.6732e-38	5042200000	9	9	8	9	7	9	8	7	8	9	7	9	8	7	26.7	34.012	311	13	20	13	14	15	12	24.1	26.7	24.1	26.7	26.4	24.1	8.80277	8.50715	8.49627	9.05732	8.70868	8.79923	8.76391	8.4685	8.4572	8.83036
4285	Q14145	Kelch-like ECH-associated protein 1	KEAP1	0.271187	0.347087	0.0759	no	no	1.2819e-40	910400000	6	6	4	5	3	6	3	3	4	5	3	6	3	3	13.8	69.666	624	12	11	5	12	9	9	9.3	11.1	7.4	13.8	7.4	7.5	8.23221	8.05953	7.74817	8.21213	7.97552	7.83542	7.91745	7.75812	7.40473	8.27066
4187	Q13162;E9PEN3;A6NG45;A6NJJ0	Peroxiredoxin-4	PRDX4	0.270871	-0.151469	-0.422341	no	no	1.3503e-220	36073000000	17	14	14	16	15	14	17	15	12	13	13	11	14	12	64.9	30.54	271	70	69	69	67	61	62	62.4	64.9	63.1	64.9	64.9	64.6	9.7053	9.50499	9.27291	9.85047	9.58961	9.50518	9.79959	9.58363	9.39266	9.71432
1338	O95340-2;E7ER89;H0Y373;O95340	Bifunctional 3-phosphoadenosine 5-phosphosulfate synthase 2;Sulfate adenylyltransferase;Adenylyl-sulfate kinase	PAPSS2	0.270812	-0.40021	-0.671022	no	no	1.5082e-248	13094000000	27	26	21	25	21	21	24	19	20	24	20	20	23	19	48.5	69.97	619	66	67	60	69	68	57	36.8	43.8	35.2	35.5	44.9	32.1	9.31988	9.07229	8.95789	9.3601	9.0463	9.07148	9.37931	9.15042	8.99174	9.2931
6690	Q9ULL8;Q9ULL8-2	Protein Shroom4	SHROOM4	0.270735	-0.872789	-1.14352	no	no	1.1704e-89	1850300000	11	11	7	7	6	8	7	8	7	7	6	8	7	8	11.5	164.86	1493	12	12	9	15	12	9	8.1	7.5	7.4	9.6	9.1	9	8.43889	8.16032	8.11418	8.44999	8.09226	8.19907	8.46633	8.19893	8.12885	8.58814
6877	Q9Y4C2;Q9Y4C2-2	Protein FAM115A	FAM115A	0.270329	0.923934	0.653605	no	no	5.2097e-26	354840000	5	5	2	3	3	2	3	1	2	3	3	2	3	1	5.9	102.12	921	3	5	6	5	5	2	2.5	3.7	3.5	2.5	3.7	1.1	7.65129	7.52277	7.05979	7.78303	7.6153	7.2887	7.92302	7.80101	7.31205	7.58616
2282	O00159;F5H3W9;O00159-3;F5H6E2;O00159-2;F5H730	Unconventional myosin-Ic	MYO1C	0.270263	-0.130931	-0.401194	no	no	0	39119000000	47	47	40	38	37	40	42	40	40	38	37	40	42	40	47.2	121.68	1063	123	123	115	133	130	116	43.1	41.7	40	45.2	45.5	43.7	9.76936	9.55119	9.36582	9.77191	9.4882	9.45284	9.77353	9.57668	9.33518	9.83011
1743	F5GZA2;P39060;P39060-1;F8WDA7;P39060-2	Collagen alpha-1(XVIII) chain;Endostatin	COL18A1	0.270045	-0.577151	-0.847195	no	no	4.7436e-242	25845000000	17	17	15	17	16	14	14	15	15	17	16	14	14	15	14.5	178.19	1754	40	39	37	33	35	36	12.1	14.5	14	13	11.6	12.1	9.65074	9.39345	9.3011	9.6705	9.34842	9.38954	9.69611	9.43578	9.35017	9.46621
1534	Q9Y4P3;E9PF19;Q96E41;C9JVF0;F8WDI9;F8WCR3	Transducin beta-like protein 2	TBL2	0.269458	0.21927	-0.0501882	no	no	2.4958e-48	3708000000	12	12	8	8	8	8	9	9	8	8	8	8	9	9	26.6	49.797	447	15	20	16	22	20	20	17	17	17.7	16.8	18.3	17.4	8.61022	8.43588	8.12963	8.74797	8.50548	8.37927	8.68011	8.5225	8.16349	8.72685
49	A6NC48;Q10588;H0Y984;H0Y8G4;H0Y9Q9	ADP-ribosyl cyclase 2	BST1	0.269399	0.00144342	-0.267955	no	no	1.3357e-35	614880000	5	5	3	2	5	4	4	4	3	2	5	4	4	4	22.5	37.482	333	4	4	8	6	7	7	14.1	9.6	22.5	16.8	16.8	16.8	7.72444	7.52179	7.29601	7.70715	7.4522	7.35457	8.14882	7.9415	7.7281	7.92818
6753	Q9UPY3;E0AD28;B3KRG4;H0YJZ6	Endoribonuclease Dicer	DICER1	0.269276	-0.181421	-0.450697	no	no	6.716e-72	876400000	11	11	6	9	9	8	8	9	6	9	9	8	8	9	8.3	218.68	1922	12	15	12	14	15	17	3.4	5.7	5.5	4.7	4.7	6.5	8.00745	7.80285	7.58227	8.04021	7.77015	7.70579	8.24137	8.05138	7.79076	8.32422
3114	P15907;A8MYF0;B2R513;C9J6X5;C9K0R8;C9JFM4;C9JI90;C9JR47;C9JKG0;C9JPG6;C9JTR0;C9JH16;C9JVK7	Beta-galactoside alpha-2,6-sialyltransferase 1	ST6GAL1	0.26901	0.549029	0.280019	no	no	1.5185e-45	705320000	6	6	4	5	5	5	4	3	4	5	5	5	4	3	16.3	46.604	406	7	9	9	8	7	3	13.5	13.8	16	16	13.5	9.1	8.10684	7.96202	7.55944	8.1003	7.88301	7.69546	8.24055	8.09132	7.70416	8.09795
4052	Q03135;E9PCT5	Caveolin-1;Caveolin	CAV1	0.268881	-0.0486546	-0.317536	no	no	1.7123e-106	22328000000	11	3	9	10	9	9	10	10	3	3	3	3	3	3	68	20.471	178	35	34	35	36	32	30	61.8	68	61.8	61.8	68	68	9.54576	9.35334	9.09958	9.61633	9.36324	9.26141	9.67636	9.46792	9.25749	9.48917
3573	P48553;B4E0X9	Trafficking protein particle complex subunit 10	TRAPPC10	0.268572	-0.0687396	-0.337311	no	no	1.3587e-40	368460000	5	5	3	4	3	4	3	3	3	4	3	4	3	3	7	142.19	1259	3	5	3	7	4	3	3.6	5.4	5.2	5.4	3.6	4	7.61234	7.41015	7.18313	7.66708	7.4408	7.2757	7.62419	7.45304	7.13701	8.07708
5007	Q86UT6;Q86UT6-2	NLR family member X1	NLRX1	0.26808	-0.495491	-0.763571	no	no	3.6744e-07	92086000	1	1	1	1	1	1	1	1	1	1	1	1	1	1	1.2	107.61	975	4	3	2	1	3	3	1.2	1.2	1.2	1.2	1.2	1.2	7.24593	6.99977	6.8821	7.16233	6.91041	6.80593	7.08322	6.82129	6.73918	6.67823
5157	Q8N1I0;Q8N1I0-3;H0Y2M7;H0Y599;Q8N1I0-2;H0Y2Y2;H0Y7H7;H0YG08;F5GXW1;C9J7D9;C9J637;C9JDB3;Q8N1I0-4	Dedicator of cytokinesis protein 4	DOCK4	0.267901	0.119683	-0.148218	no	no	0	10136000000	36	36	27	27	28	21	28	28	27	27	28	21	28	28	21.7	225.2	1966	57	65	54	51	63	57	16.1	16.7	17.7	11.9	17.5	17.5	9.15821	8.97445	8.69607	9.19997	8.95797	8.83064	9.30192	9.13191	8.8124	9.20526
1855	F5H527;Q76I76;Q76I76-4	Protein phosphatase Slingshot homolog 2	SSH2	0.267536	0.17984	-0.0876952	no	no	8.8183e-06	42820000	1	1	1	1	1	1	1	0	1	1	1	1	1	0	1.1	161.15	1450	2	2	1	2	2	0	1.1	1.1	1.1	1.1	1.1	0	6.9438	6.75409	6.49268	6.75196	6.51328	6.37811	7.00689	6.82607	6.53908	6.9588
3010	P10301	Ras-related protein R-Ras	RRAS	0.267469	-0.232415	-0.499884	no	no	7.9969e-76	2167700000	7	5	6	6	7	6	6	6	4	4	5	4	4	4	41.7	23.48	218	15	16	16	17	16	12	37.2	37.2	41.7	37.2	37.2	37.2	8.53569	8.28044	8.18347	8.6443	8.35568	8.33049	8.62317	8.41061	8.21091	8.45197
4128	Q12768;E7EQI7;H0YAY2;E5RFU6	WASH complex subunit strumpellin	KIAA0196	0.266735	0.144792	-0.121944	no	no	1.2683e-167	5766500000	26	26	17	23	19	14	17	15	17	23	19	14	17	15	26.3	134.28	1159	30	33	30	23	24	22	19.7	23.4	20.4	13.6	19.1	16.5	8.90127	8.69363	8.48111	9.02338	8.76061	8.68039	9.02776	8.84445	8.56471	8.94375
2475	O43310-3;O43310-2;O43310	CBP80/20-dependent translation initiation factor	CTIF	0.266095	0.106079	-0.160017	no	no	1.9096e-22	108170000	4	4	2	3	2	1	2	3	2	3	2	1	2	3	8.5	72.114	648	2	3	2	3	3	5	5.2	6.9	5.2	2.5	5.2	6.8	6.84501	6.65409	6.39613	7.46651	7.27761	7.01393	7.15103	6.93593	6.74275	7.19783
4242	Q13563;Q13563-3;Q13563-5;Q13563-4;Q13563-2;B4DFN3	Polycystin-2	PKD2	0.265168	0.216652	-0.0485152	no	no	6.2028e-29	421180000	4	4	2	2	3	2	2	3	2	2	3	2	2	3	5.7	109.69	968	5	3	7	4	4	5	2.9	2.9	4.3	2.9	2.9	4.2	7.56515	7.39754	7.07052	7.25501	7.00762	6.89276	8.31702	8.02963	8.00191	7.77012
5221	Q8NB78;F2Z2A7;Q8NB78-2;H0Y6H0	Lysine-specific histone demethylase 1B	KDM1B	0.265103	0.407536	0.142433	no	no	6.2849e-42	151160000	4	4	3	1	3	3	2	2	3	1	3	3	2	2	8.6	92.097	822	4	2	4	6	3	3	4.4	2.4	4.4	8.6	4.4	4.4	7.45042	7.30003	6.91683	6.96169	6.74801	6.55121	7.28601	7.12392	6.77945	7.78068
3155	P17812;B4DR64;B7Z9C4	CTP synthase 1	CTPS1	0.264652	0.331246	0.0665934	no	no	0	23536000000	25	23	23	23	23	24	23	22	21	21	21	22	21	20	53.8	66.69	591	76	83	74	75	77	81	49.9	49.9	49.9	52.6	49.7	47	9.54212	9.38198	9.03121	9.565	9.32562	9.19209	9.62322	9.43792	9.16391	9.4743
2878	P04179;P04179-2;B3KUK2;F5GYZ5;F5H4R2;F5H3C5;B4E3K9;G8JLJ2;F5GXZ9;G5E9P6	Superoxide dismutase [Mn], mitochondrial;Superoxide dismutase	SOD2	0.264392	0.678603	0.414211	no	no	2.5888e-120	5619200000	11	11	11	11	11	11	11	10	11	11	11	11	11	10	47.7	24.722	222	35	37	38	28	34	34	47.7	47.7	47.7	47.7	47.7	47.7	8.89659	8.7727	8.29137	8.92438	8.74405	8.45562	9.17811	9.0463	8.59601	8.78618
165	P55196-5;A8MQ02;P55196;P55196-1;C9JX92;P55196-3;Q5TIG5;C9IYT9;P55196-6;P55196-2;H0Y7R8;H0Y8L4;H0YA98;H0Y948;H0Y9I0	Afadin	MLLT4	0.264128	-0.273218	-0.537346	no	no	4.0428e-152	2640900000	19	16	10	9	10	11	9	13	8	8	7	9	7	11	14.9	207.79	1834	9	9	8	10	8	16	8.3	7.1	8.5	8.9	7.4	11.7	8.42747	8.1605	8.08948	8.48093	8.17519	8.18455	8.71214	8.48283	8.32519	8.4459
5329	Q8TD19;B3KY50;G3V459;REV__Q9P0M6;REV__Q5SQT3;G3V2Z5	Serine/threonine-protein kinase Nek9	NEK9	0.263562	-0.449429	-0.712992	no	no	5.1817e-127	3807000000	19	19	16	14	14	11	15	12	16	14	14	11	15	12	24.6	107.17	979	29	28	27	23	28	28	21.2	17.8	18.3	16.6	19.3	17.3	8.77342	8.51167	8.4292	8.77961	8.45998	8.49642	8.79784	8.55467	8.43004	8.73358
3636	P50281;F8W1B7;Q9Y5R2;F5GWC8;P51511	Matrix metalloproteinase-14	MMP14	0.263285	-0.0771063	-0.340391	no	no	8.3971e-162	14465000000	20	20	17	18	15	15	15	16	17	18	15	15	15	16	34.9	65.893	582	48	52	42	42	44	42	29.4	32.6	28.2	25.8	27.3	28	9.37683	9.18159	8.93562	9.35641	9.11261	8.98943	9.44133	9.24289	9.00574	9.34577
3190	P20336	Ras-related protein Rab-3A	RAB3A	0.262956	0.409897	0.146941	no	no	3.7278e-19	92655000	4	1	3	4	2	4	4	3	1	1	0	1	1	1	22.7	24.984	220	2	2	0	2	1	2	14.1	22.7	7.3	22.7	22.7	14.1	7.28436	7.10643	6.81088	7.45043	7.25914	7.00221	NaN	NaN	NaN	7.16622
322	Q9HB21;Q5RGS4;B3KQ55	Pleckstrin homology domain-containing family A member 1	PLEKHA1	0.262531	-0.0706641	-0.333195	no	no	2.1092e-22	415910000	2	2	2	2	1	2	2	2	2	2	1	2	2	2	7.4	45.553	404	4	4	3	5	4	4	7.4	7.4	4.2	7.4	7.4	7.4	7.90644	7.71124	7.46516	7.6232	7.35999	7.28074	7.38303	7.20812	6.90351	8.05492
6339	Q9NUM4;C9JZ87;F2Z3N7	Transmembrane protein 106B	TMEM106B	0.262482	0.184966	-0.0775164	no	no	1.5912e-28	193570000	4	4	2	3	2	3	2	2	2	3	2	3	2	2	17.2	31.127	274	5	6	4	5	3	5	9.5	12.4	6.6	14.2	6.6	9.5	7.60808	7.40173	7.1858	7.59554	7.36003	7.21733	7.43962	7.24296	7.00091	7.5289
2798	O95786;O95786-2;B3KWW1;A2A376;F5H5W6;F5GY09	Probable ATP-dependent RNA helicase DDX58	DDX58	0.26228	0.677933	0.415653	no	no	8.7838e-186	3764100000	20	20	16	14	14	13	13	15	16	14	14	13	13	15	22.6	106.6	925	29	26	29	29	29	27	18.4	16.6	17	16.1	15.1	16.6	8.75186	8.60308	8.21437	8.83031	8.66118	8.33893	8.87065	8.73057	8.31108	8.73504
447	P40818;B4DKA8	Ubiquitin carboxyl-terminal hydrolase 8;Ubiquitin carboxyl-terminal hydrolase	USP8	0.262267	-0.253142	-0.51541	no	no	2.2583e-103	2034600000	11	11	8	8	7	8	7	9	8	8	7	8	7	9	14.4	127.52	1118	21	23	21	22	22	23	10.9	11.2	8	9.7	8.9	12.1	8.49294	8.25242	8.12159	8.45828	8.1611	8.15336	8.46821	8.26295	8.04415	8.56891
1940	F8VW96;Q16527;F8VQR7	Cysteine and glycine-rich protein 2	CSRP2	0.262209	-0.22033	-0.482539	no	no	1.4802e-28	354570000	2	2	2	2	2	2	2	2	2	2	2	2	2	2	14	26.736	243	7	6	6	6	6	5	14	14	14	14	14	14	7.73505	7.47455	7.38933	7.64644	7.30287	7.38414	7.75445	7.52464	7.36816	7.78853
820	B7ZKM8;O95487;O95487-2	Protein transport protein Sec24B	SEC24B	0.261905	0.0164098	-0.245496	no	no	8.0325e-85	2461000000	10	9	8	6	7	6	7	6	8	6	7	6	6	6	11.4	140.42	1298	15	20	13	14	15	14	10.2	7.9	8.6	7.4	8.6	7.4	8.64608	8.42289	8.25015	8.55364	8.30029	8.19904	8.47172	8.30986	7.96467	8.62059
5490	Q969E2;Q969E2-2;C9JWM2;F8WDW4;Q969E2-3	Secretory carrier-associated membrane protein 4	SCAMP4	0.261872	-0.0496307	-0.311503	no	no	2.6031e-10	2104200000	2	2	2	2	2	2	2	1	2	2	2	2	2	1	15.7	25.728	229	6	3	5	4	5	5	15.7	15.7	15.7	15.7	15.7	10.9	8.50755	8.2828	8.11391	8.46928	8.16301	8.17342	8.62889	8.36858	8.28292	8.3796
4609	Q5EBL4;Q5EBL4-2;G8JLD1;Q5EBL4-3;Q969X0;F5H6W5	RILP-like protein 1	RILPL1	0.2617	-0.473735	-0.735435	no	no	3.121e-87	972120000	5	5	4	5	4	4	5	5	4	5	4	4	5	5	23.8	47.107	403	9	14	13	9	13	12	16.9	23.8	22.1	22.1	23.8	23.8	8.15918	7.94739	7.74567	8.18687	7.82896	7.93616	8.37511	8.11793	8.02531	8.06644
3166	P18084	Integrin beta-5	ITGB5	0.260927	-0.580724	-0.841651	no	no	1.5641e-84	1997800000	10	10	7	9	7	6	6	6	7	9	7	6	6	6	18.1	88.053	799	14	15	9	12	12	9	13	16.9	13	13	11.8	11.8	8.29916	8.04829	7.94141	8.43829	8.11304	8.1602	8.77703	8.5097	8.43946	8.45014
6219	Q9HCC0;Q9HCC0-2;D6RD67;D6RDF7;D6R9R1	Methylcrotonoyl-CoA carboxylase beta chain, mitochondrial	MCCC2	0.260825	0.261431	0.00060594	no	no	7.8568e-64	1284500000	10	10	7	8	6	7	6	7	7	8	6	7	6	7	20.1	61.332	563	20	16	16	19	14	13	14.7	18.8	11	16.9	13.5	11.5	8.46142	8.26741	8.01812	8.27119	8.04739	7.87616	8.20063	8.0412	7.68817	8.33628
438	P24723;B4DJN5;G3V4Q6;G3V4L3;G3V4X4;G3V5U5;Q02156;H0YJX3;G3V5Y6;G3V4Q9;G3V304;G3V3E7;G3V5F8	Protein kinase C eta type	PRKCH	0.260385	-0.171719	-0.432104	no	no	1.1147e-30	406940000	7	7	2	6	3	4	2	2	2	6	3	4	2	2	11.7	77.828	683	4	8	5	8	4	5	2.8	10.5	4.8	6	3.4	2.5	7.22536	6.99007	6.84686	8.12577	7.82876	7.82066	7.38819	7.13252	7.03651	8.07925
398	B4DFQ6;Q96CM8;B4DHT5;E9PF16;B4DUF5;D6RF87	Acyl-CoA synthetase family member 2, mitochondrial	ACSF2	0.260319	-0.371949	-0.632268	no	no	4.8088e-62	1945400000	9	9	6	4	7	4	5	6	6	4	7	4	5	6	26.9	70.622	640	13	9	12	9	9	10	18.9	9.2	23.4	12.7	17.3	18.4	8.52133	8.25938	8.17736	8.36696	8.06285	8.06896	8.64301	8.39799	8.27766	8.50632
651	Q9BX69;B4E2N1;Q6XZE5	Caspase recruitment domain-containing protein 6	CARD6;CINCIN1	0.260104	0.0305161	-0.229588	no	no	2.1996e-70	1452500000	4	4	3	3	2	3	3	3	3	3	2	3	3	3	8.5	116.47	1037	6	4	4	6	8	5	4.9	4.9	3	4.9	7.3	4.9	8.41784	8.23183	7.95989	8.02621	7.78144	7.66049	8.38819	8.21099	7.91326	8.36961
6017	Q9C0C2;Q9C0C2-2;E9PKK0;E9PKE7	182 kDa tankyrase-1-binding protein	TNKS1BP1	0.259952	0.170183	-0.0897694	no	no	2.2376e-209	5799800000	20	20	11	12	11	11	10	12	11	12	11	11	10	12	16.4	181.79	1729	22	22	16	23	21	17	7.8	9.3	8.6	7.5	7.6	9.6	8.89762	8.7163	8.43077	8.91515	8.6742	8.54438	9.07081	8.90169	8.57936	9.13672
4859	Q6UWE0;Q6UWE0-2;Q6UWE0-3	E3 ubiquitin-protein ligase LRSAM1	LRSAM1	0.259627	-0.167872	-0.427499	no	no	3.7154e-44	644450000	9	9	3	6	4	4	4	4	3	6	4	4	4	4	20.6	83.593	723	4	8	4	7	6	4	7.9	13.4	9.4	9.5	11.6	9.8	7.83567	7.56471	7.50233	8.11879	7.76811	7.86232	8.01448	7.77783	7.63782	8.10748
5793	Q99714;Q99714-2;Q5H928	3-hydroxyacyl-CoA dehydrogenase type-2	HSD17B10	0.259605	0.249685	-0.00992037	no	no	6.5046e-90	4333600000	7	7	7	5	6	6	6	5	7	5	6	6	6	5	31.4	26.923	261	13	12	10	11	10	13	31.4	26.8	31.4	31.4	31.4	28.4	8.92632	8.75119	8.44727	8.7984	8.55986	8.42434	8.718	8.53747	8.24964	8.78342
6163	Q9H871;Q9H871-2	Protein RMD5 homolog A	RMND5A	0.259199	0.230347	-0.0288521	no	no	4.994e-11	224520000	2	2	1	2	2	1	1	1	1	2	2	1	1	1	6.4	43.992	391	3	4	4	2	3	3	3.1	6.4	6.4	3.1	3.1	3.1	7.37557	7.22178	6.85009	7.5924	7.32809	7.25127	7.76739	7.56746	7.33435	7.00484
1702	Q07889;G5E9C8;F8W9I5;F5GX06;Q07890;B7ZKT6	Son of sevenless homolog 1	SOS1	0.259198	-0.151469	-0.410667	no	no	1.859e-49	578920000	6	6	5	3	3	4	3	3	5	3	3	4	3	3	4.9	152.46	1333	13	11	8	13	12	9	3.9	2	2.9	3.2	2	2	7.88856	7.68089	7.46844	7.90272	7.60845	7.59482	7.87441	7.66881	7.4509	8.0983
3289	P26440;B3KVI7;H0YLC3;H0YN10;C9JUI0;H0YKV0	Isovaleryl-CoA dehydrogenase, mitochondrial	IVD	0.258687	0.266455	0.00776814	no	no	4.848e-26	1825400000	8	8	5	6	6	7	5	4	5	6	6	7	5	4	24.1	46.319	423	5	8	6	8	6	4	12.1	20.1	22	18.2	14.2	13.7	8.42758	8.23406	7.98334	8.60972	8.36857	8.2392	8.31469	8.14013	7.83447	8.54877
4833	Q6PCE3;F5GWK0	Glucose 1,6-bisphosphate synthase	PGM2L1	0.258625	0.0652948	-0.19333	no	no	2.2213e-155	5496600000	13	13	11	10	10	8	10	9	11	10	10	8	10	9	29.1	70.441	622	26	29	25	20	27	25	26.7	20.9	23.5	19	23.2	24.3	8.89055	8.7116	8.41908	9.07199	8.81307	8.72432	8.94263	8.76868	8.46117	8.86774
1820	Q4G176;F5H5A1;F5H755;F5H362;H0YGC7	Acyl-CoA synthetase family member 3, mitochondrial	ACSF3	0.2584	-0.461529	-0.719928	no	no	6.0899e-20	529930000	3	3	2	3	3	3	3	3	2	3	3	3	3	3	6.1	64.129	576	9	10	8	11	11	9	3.5	6.1	6.1	6.1	6.1	6.1	7.68036	7.43545	7.31488	7.91532	7.63241	7.59539	7.97634	7.69251	7.65739	8.04167
6024	Q9C0I1;Q9C0I1-2;Q9C0I1-3	Myotubularin-related protein 12	MTMR12	0.25834	0.121361	-0.136979	no	no	4.6404e-31	832310000	9	9	3	7	3	7	6	7	3	7	3	7	6	7	14.7	86.147	747	9	13	7	12	13	12	3.5	11.1	3.5	11.6	9.9	11.8	7.58972	7.41024	7.11929	8.10612	7.8474	7.75823	7.44988	7.2791	6.96193	8.49597
3052	P12236;Q9H0C2	ADP/ATP translocase 3	SLC25A6	0.258201	0.125164	-0.133037	no	no	1.9702e-166	747030000	21	3	19	21	18	19	18	19	3	3	3	3	3	3	60.7	32.866	298	13	19	21	13	14	15	57.7	60.7	57.7	60.1	57.7	60.4	7.86415	7.68351	7.39601	8.22981	7.97646	7.87521	8.13953	7.89915	7.76799	7.79363
4835	Q6PGP7;D6RCE2;H0Y964;H0Y915	Tetratricopeptide repeat protein 37	TTC37	0.258119	-0.0953169	-0.353436	no	no	3.0319e-179	5499900000	26	26	18	18	19	17	18	17	18	18	19	17	18	17	23.1	175.48	1564	35	33	39	33	38	33	17.5	16.5	17.8	14.8	17.7	15.2	8.76153	8.5318	8.37517	8.79806	8.51414	8.47923	9.28986	8.6815	9.16699	8.87083
30	A2RRP1;A2RRP1-2;H0Y5G7;C9JCM7	Neuroblastoma-amplified sequence	NBAS	0.257581	-0.0416635	-0.299245	no	no	2.3899e-128	1648700000	23	23	12	14	10	11	8	13	12	14	10	11	8	13	12.9	268.57	2371	19	22	14	16	17	17	7.2	8.1	5.3	5.9	4.9	8.1	8.43302	8.13296	8.13098	8.4796	8.22417	8.12762	8.45031	8.07357	8.21373	8.30099
2542	O60333-3			0.257545	0.287695	0.0301499	no	no	4.4466e-96	291620000	11	4	7	8	8	9	9	7	2	2	4	3	3	1	12	130.36	1153	2	2	5	3	3	1	8.2	9.2	9.2	9.7	11.2	8.5	7.57661	7.37813	7.14107	7.50761	7.24876	7.15987	7.91934	7.77489	7.37105	7.8636
524	Q9Y6E0-2;B4DR80;Q9Y6E0;E9PCB9;F5H2G3;H0Y630;Q9P289-3;E9PCB4;Q5JV98;Q5JV99;C9JJV0	Serine/threonine-protein kinase 24;Serine/threonine-protein kinase 24 36 kDa subunit;Serine/threonine-protein kinase 24 12 kDa subunit	STK24	0.257397	0.156016	-0.101381	no	no	1.2498e-137	1390800000	15	7	11	11	12	10	12	13	6	6	6	5	6	6	36.7	47.913	431	11	10	9	7	11	11	28.8	27.6	34.1	27.1	29.7	33.2	8.3149	8.14004	7.83531	8.36293	8.11049	8.00719	8.3865	8.20295	7.92395	8.15658
3681	P51809;P51809-3;P51809-2;E5RH06	Vesicle-associated membrane protein 7	VAMP7	0.25736	0.120906	-0.136454	no	no	3.2822e-62	1273500000	7	7	5	5	6	4	4	5	5	5	6	4	4	5	39.1	24.935	220	11	10	12	8	12	10	30	30	37.7	28.6	21.8	30	8.14092	7.95669	7.67961	8.37869	8.12934	8.01899	8.30649	8.11783	7.85344	8.16277
3470	P40261;F5H0R4	Nicotinamide N-methyltransferase	NNMT	0.257293	0.632696	0.375403	no	no	6.1686e-69	11556000000	6	6	5	4	5	5	4	5	5	4	5	5	4	5	28.8	29.574	264	17	18	19	18	18	19	25.4	17	20.5	25.4	17	20.5	9.28668	9.15531	8.70339	9.27919	9.09458	8.81861	9.29787	9.15217	8.75272	9.18179
6559	Q9UBX1;H0YD65	Cathepsin F	CTSF	0.257269	0.553722	0.296453	no	no	3.2065e-12	84353000	2	2	2	1	2	2	1	1	2	1	2	2	1	1	4.1	53.365	484	3	1	3	2	1	2	4.1	2.1	4.1	4.1	2.1	2.1	7.29649	7.15552	6.73922	5.8528	5.62284	5.46675	7.37051	7.26411	6.70757	7.11488
4868	Q6VY07;Q6VY07-2;B4DF77;E9PNZ9;H0YF56;E9PSG7;E9PSE1;E9PPK2;H0YCU5;H0YE62	Phosphofurin acidic cluster sorting protein 1	PACS1	0.257152	0.222936	-0.0342158	no	no	2.9427e-36	1196900000	10	10	8	6	6	7	8	8	8	6	6	7	8	8	10.9	104.9	963	14	11	13	11	15	16	9	6.2	6.9	7.8	8.6	8.7	8.41863	8.2528	7.92023	8.14255	7.89265	7.78355	8.33072	8.16897	7.8234	8.12192
6739	Q9UPN3;F5GZL7;Q9UPN3-4;H0Y390;E9PNZ4;E7ES95;E9PLY0;H0Y6T5;F5GZS2;B4E2T3;H0Y7I1;O15169;O15169-2;H0YBX0;E9PS75	Microtubule-actin cross-linking factor 1, isoforms 1/2/3/5	MACF1	0.257121	-0.164143	-0.421264	no	no	0	410250000	198	1	138	153	146	153	146	143	1	1	1	1	1	1	32.1	838.3	7388	4	4	3	3	4	4	23.2	24.8	23.4	26.4	24.2	22.3	7.6652	7.4723	7.21985	7.73349	7.45923	7.40393	7.91902	7.71898	7.48615	7.84596
4098	Q08426;B4DWG3;F5GWL9	Peroxisomal bifunctional enzyme;Enoyl-CoA hydratase/3,2-trans-enoyl-CoA isomerase;3-hydroxyacyl-CoA dehydrogenase	EHHADH	0.257092	-0.729792	-0.986884	no	no	3.7141e-80	467230000	6	6	3	4	4	4	5	4	3	4	4	4	5	4	13.6	79.494	723	5	8	7	8	7	6	8.7	10.8	9.8	10.4	12.4	10.4	7.61621	7.33828	7.29079	7.74486	7.40506	7.47942	8.15731	7.95012	7.73644	7.81539
4566	Q9UKT8;Q9UKT8-2;Q4VXH1	F-box/WD repeat-containing protein 2	FBXW2	0.25692	-0.307312	-0.564232	no	no	1.1184e-22	193130000	2	2	1	1	1	2	2	2	1	1	1	2	2	2	5.9	51.511	454	2	3	3	5	3	3	4.4	4.4	4.4	5.9	5.9	5.9	7.31283	6.9729	7.04751	7.51716	7.19343	7.23772	7.44067	7.18853	7.08454	7.56497
2359	O14672;A8MY20;B4DU28;H0YNC5;C9J9B4;B5MC71;C9J994	Disintegrin and metalloproteinase domain-containing protein 10	ADAM10	0.256804	-0.145482	-0.402286	no	no	5.8898e-211	6161400000	20	19	16	16	13	15	16	14	15	15	12	14	15	13	36.8	84.141	748	32	29	27	30	31	28	32.2	32.5	27.1	29.1	31.3	28.9	8.98318	8.76804	8.57498	9.03415	8.75875	8.70584	9.03531	8.82336	8.62213	8.8849
6793	Q9Y2H1;B4E3J8;F5H277;F5GY51;F5H7Z3;F5H0V1;F5H5E6	Serine/threonine-protein kinase 38-like	STK38L	0.256433	-0.19711	-0.453544	no	no	2.9302e-56	1200000000	8	7	4	5	6	6	6	7	4	5	6	6	6	6	17.5	54.002	464	14	11	12	7	14	14	11	13.6	13.6	15.1	15.1	17.5	8.36614	8.14771	7.96305	8.17432	7.92154	7.819	8.5178	8.29756	8.11744	7.996
275	Q9Y483;B1AKT6;Q9Y483-3;F5GXQ2;Q9Y483-2	Metal-response element-binding transcription factor 2	MTF2	0.25623	-0.311997	-0.568227	no	no	7.6176e-14	155640000	5	5	0	1	1	3	3	4	0	1	1	3	3	4	11.3	67.105	593	0	3	3	5	3	5	0	2	2	9.4	5.4	8.4	NaN	NaN	NaN	7.0456	6.67738	6.80275	7.08927	6.89121	6.65305	7.69916
1219	Q9NPA8;E5RHX8;G3V117;E5RJ84;E5RHT9;E5RI00	Enhancer of yellow 2 transcription factor homolog	ENY2	0.256109	0.0962213	-0.159887	no	no	7.7212e-25	454450000	3	3	2	2	3	2	2	2	2	2	3	2	2	2	27.7	11.528	101	2	2	8	2	3	2	23.8	10.9	27.7	27.7	23.8	27.7	6.91405	6.70794	6.49138	7.8378	7.61376	7.44312	8.13066	7.89329	7.75497	6.72436
4230	Q13488;Q13488-2;E9PNA6;E9PM12;H0YCE3;E9PMC5;G3V1I8;H0YEL3	V-type proton ATPase 116 kDa subunit a isoform 3	TCIRG1	0.256031	0.00579688	-0.250234	no	no	2.5471e-84	1639100000	9	9	8	7	7	7	7	7	8	7	7	7	7	7	14.3	92.967	830	10	11	10	12	9	11	12.9	12	10.1	11.7	12	11.7	8.42818	8.24057	7.97322	8.45133	8.18594	8.11146	8.34998	8.1465	7.92293	8.4933
858	B9EGQ7;O43432;Q504Z1;F5H564;F5H8J4;Q5SWD0	Eukaryotic translation initiation factor 4 gamma 3	EIF4G3	0.254782	-0.0487942	-0.303576	no	no	6.0714e-125	2074200000	17	10	12	15	15	15	14	15	7	9	8	8	9	8	11.1	177.28	1591	26	26	28	29	26	28	7.7	10	9.6	10	9.2	10	8.41152	8.22209	7.95993	8.45211	8.15464	8.14746	8.64994	8.44905	8.21856	8.53207
4640	Q5MNZ9;Q5MNZ9-2;G5EA37	WD repeat domain phosphoinositide-interacting protein 1	WIPI1	0.25441	-0.157561	-0.411972	no	no	2.4832e-72	251910000	4	4	3	2	2	3	2	2	3	2	2	3	2	2	20	48.673	446	3	2	2	5	2	1	12.3	10.8	10.8	15.2	13.7	7.6	7.68833	7.41243	7.36063	7.32707	7.11711	6.91069	7.63701	7.39964	7.26136	7.99644
3515	P43155;P43155-2;C9JBD1;P43155-3;H0Y4Z7;A6PVN3	Carnitine O-acetyltransferase	CRAT	0.254118	-0.787265	-1.04138	no	no	5.7275e-29	816420000	5	5	4	4	4	4	4	4	4	4	4	4	4	4	9.6	70.857	626	5	6	6	8	6	7	8.5	8.5	8.5	8.5	8.5	7.2	8.04583	7.73917	7.75035	8.10353	7.7066	7.88104	8.13912	7.84726	7.82873	8.11681
4658	Q5SXM2	snRNA-activating protein complex subunit 4	SNAPC4	0.254104	0.892515	0.638411	no	no	2.0627e-07	26102000	3	3	2	2	1	2	3	3	2	2	1	2	3	3	1.6	159.43	1469	2	2	1	2	4	3	1.1	1.1	0.5	1.1	1.6	1.6	6.66718	6.52748	6.1066	6.13881	5.9875	5.6074	6.45752	6.2211	6.08055	6.67462
4982	Q86SQ4-3;Q86SQ4-4;Q86SQ4;Q86SQ4-2;F5H2L1;H0YGP2	G-protein coupled receptor 126	GPR126	0.253434	-0.440421	-0.693855	no	no	1.0313e-28	317470000	5	5	2	2	2	4	3	2	2	2	2	4	3	2	6.6	139.9	1250	5	6	6	8	7	6	2.8	2.8	2.8	5.7	3.7	2.8	7.65675	7.3965	7.31071	7.52896	7.19609	7.25756	7.68845	7.43435	7.33482	7.86347
6030	Q9GZP9	Derlin-2	DERL2	0.25337	0.713521	0.460151	no	no	4.4433e-10	2164300000	2	2	2	1	2	2	2	1	2	1	2	2	2	1	17.2	27.567	239	3	2	3	2	3	2	17.2	12.6	17.2	17.2	17.2	12.6	8.64593	8.50713	8.083	8.20661	8.03965	7.7107	8.64226	8.49877	8.09153	8.84428
358	Q3KNV8-2;Q3KNV8;B3KWT8	Polycomb group RING finger protein 3	PCGF3	0.253018	0.386883	0.133865	no	no	1.113e-31	118650000	2	2	1	1	1	1	1	1	1	1	1	1	1	1	17	28.748	247	2	3	2	1	2	3	8.9	8.9	8.9	8.1	8.9	8.9	6.70143	6.55406	6.16044	6.44521	6.21506	6.05945	6.6444	6.47969	6.14355	7.99118
5702	Q96PU5;Q96PU5-7;Q96PU5-5;Q96PU5-6;Q96PU5-2;Q96PU5-3;Q96PU5-8;Q96PU5-4;F5H602;Q3LSM7	E3 ubiquitin-protein ligase NEDD4-like	NEDD4L	0.252839	-0.0353423	-0.288181	no	no	3.2916e-22	383190000	7	5	5	5	5	4	6	6	4	3	4	3	4	4	8.3	111.93	975	7	7	7	7	6	7	4.4	4.3	4.4	3.3	7.2	7.2	7.86611	7.69835	7.37182	7.53557	7.28181	7.1815	7.99357	7.81208	7.52704	7.65629
6119	Q9H4G4;A6NKU3;Q5VZR0	Golgi-associated plant pathogenesis-related protein 1	GLIPR2	0.252335	0.341464	0.0891293	no	no	3.7842e-38	509230000	4	4	2	2	2	2	3	3	2	2	2	2	3	3	44.8	17.218	154	7	4	5	4	5	5	25.3	25.3	25.3	25.3	39.6	30.5	7.86988	7.7059	7.36747	7.8693	7.68204	7.4137	8.10503	7.95623	7.56758	7.5964
2102	Q96JK2;G3V4J7;Q96JK2-2	DDB1- and CUL4-associated factor 5	DCAF5	0.251875	0.109265	-0.142609	no	no	4.8208e-37	172120000	3	3	2	2	1	2	2	3	2	2	1	2	2	3	7	103.96	942	3	2	2	3	3	3	5.4	5.4	2.7	5.4	5.4	7	7.50899	7.31387	7.06759	7.27427	6.94312	7.00139	7.22378	7.03064	6.77887	7.49503
5441	Q92614;Q92614-4;Q92614-2;F8W6U1;Q92614-3;Q92614-5;F8W6Y3;E9PQN8;B4DFN7;E9PPV5	Unconventional myosin-XVIIIa	MYO18A	0.251285	-0.212756	-0.464041	no	no	3.8804e-44	356260000	8	6	6	5	6	7	5	6	4	3	4	5	3	4	5.2	233.11	2054	6	3	4	5	4	5	3.3	2.7	3.3	4.6	2.2	3.4	7.81615	7.59165	7.42215	7.56756	7.27582	7.25701	7.95335	7.71528	7.57865	7.83584
1490	P28370;E9PCY3;F6TQG2;P28370-2	Probable global transcription activator SNF2L1	SMARCA1	0.251218	0.0825759	-0.168642	no	no	1.3222e-227	3025400000	28	16	20	19	21	19	21	19	13	11	14	11	14	12	25.3	122.6	1054	37	29	35	37	33	27	19.1	18.2	20.5	19.2	19.7	19.4	8.74999	8.55906	8.30112	8.48386	8.22925	8.13085	8.67767	8.47147	8.25518	8.98025
5082	Q8IWC1;Q8IWC1-2;Q8IWC1-3	MAP7 domain-containing protein 3	MAP7D3	0.251217	0.100917	-0.1503	no	no	1.7708e-15	299700000	6	6	3	2	2	3	2	4	3	2	2	3	2	4	6.8	98.428	876	4	5	6	6	5	8	3.2	2.2	2.2	3.9	2.2	4.1	7.84263	7.619	7.44734	7.46845	7.19665	7.13609	7.64293	7.44275	7.21032	7.81019
786	B7Z7R3;B7Z483;P48059;B4DPH6;E7ENJ8;Q7Z4I2;C9JF46;A6NEJ8;B4DUX2;A8MUY2;P0CW19;P0CW20;H0Y592	LIM and senescent cell antigen-like-containing domain protein 1	LIMS1	0.251204	0.57781	0.326606	no	no	0	14342000000	22	15	21	21	21	19	19	19	15	15	14	13	13	13	62.3	44.39	387	57	56	42	42	44	44	62.3	62.3	60.5	56.6	54.5	55.6	9.34303	9.20952	8.76577	9.41295	9.2132	8.97958	9.42236	9.27291	8.88651	9.25739
1336	Q658Y4;E7ER68;G3V120;E7EMD5;H0YBR6	Protein FAM91A1	FAM91A1	0.250549	-0.285106	-0.535655	no	no	7.4212e-77	1993200000	8	8	7	7	6	7	8	8	7	7	6	7	8	8	11.2	93.908	838	15	17	15	16	17	17	9.4	9.9	8.4	9.9	11.2	11.2	8.43933	8.21987	8.03778	8.39879	8.10554	8.08983	8.56845	8.38277	8.10992	8.44635
3733	P53814-5;E7ETT8;P53814-6;B5MC56;P53814;C9K039;P53814-2;B5MCI0;C9JQZ8;C9JP19;C9JGQ0	Smoothelin	SMTN	0.250357	1.01194	0.76158	no	no	8.5998e-100	1668900000	14	10	7	10	8	8	6	7	5	7	5	6	5	6	21.3	98.918	915	6	7	6	8	7	7	11.6	14	11.8	13.2	9.3	10.9	8.39844	8.2633	7.82568	8.5152	8.3778	7.94854	8.27859	8.16569	7.63828	8.43447
1411	E7EVK3;Q6ZT12-4;Q6ZT12;H0Y3K2;Q6ZT12-2;Q6ZT12-3	E3 ubiquitin-protein ligase UBR3	UBR3	0.25034	-0.0706641	-0.321005	no	no	8.838e-45	285090000	5	5	3	5	1	4	3	3	3	5	1	4	3	3	4.7	216.03	1917	6	7	2	7	3	5	3.1	4.7	1.2	3.8	2.5	2.5	7.62245	7.44892	7.14016	7.44234	7.16394	7.11744	7.56848	7.387	7.10195	7.86701
5568	Q96DU7	Inositol-trisphosphate 3-kinase C	ITPKC	0.250096	0.0287342	-0.221361	no	no	9.9221e-45	204770000	4	4	2	4	2	1	3	3	2	4	2	1	3	3	13.9	75.207	683	2	5	3	1	4	4	10.4	13.9	6.6	5.3	11.7	8.8	7.26972	7.08393	6.81131	7.61178	7.36918	7.24319	7.47382	7.28339	7.02407	7.04883
121	Q9P003;A6NLH6	Protein cornichon homolog 4	CNIH4	0.249972	-0.0137839	-0.263756	no	no	5.4853e-10	2764900000	1	1	1	1	1	1	1	1	1	1	1	1	1	1	14.4	16.093	139	6	6	6	6	6	7	14.4	14.4	14.4	14.4	14.4	14.4	8.6349	8.4509	8.17319	8.67299	8.42659	8.30946	8.6364	8.42205	8.22696	8.6382
1501	O00411;E9PDE7	DNA-directed RNA polymerase, mitochondrial	POLRMT	0.249954	0.446148	0.196194	no	no	2.3148e-09	314620000	3	3	3	3	3	3	2	3	3	3	3	3	2	3	5	138.62	1230	6	5	5	5	5	5	5	5	5	5	3.9	5	7.69663	7.57166	7.09465	7.5704	7.40458	7.07199	7.84292	7.72317	7.22492	7.40461
6193	Q9HAN9;B1AN62	Nicotinamide mononucleotide adenylyltransferase 1	NMNAT1	0.249829	-0.0803848	-0.330214	no	no	6.6055e-18	557440000	3	3	3	3	3	3	3	3	3	3	3	3	3	3	12.5	31.932	279	6	4	3	6	6	5	12.5	12.5	12.5	12.5	12.5	12.5	7.91532	7.71713	7.4793	7.79938	7.55795	7.42924	7.98373	7.78158	7.55445	7.98915
1876	Q12797;F5H667;F8W7A9;E5RG56;Q12797-2;Q9H291;B7ZM95;Q8TB28;B4DIC9;E5RG29;E5RHK2;Q12797-3;Q12797-4;Q6NXR7;G3XAN5;E5RHJ2	Aspartyl/asparaginyl beta-hydroxylase	ASPH	0.249754	0.482896	0.233142	no	no	6.0545e-168	6070700000	21	21	18	14	16	16	14	12	18	14	16	16	14	12	30.6	85.862	758	41	38	35	35	30	26	27.8	21.8	25.2	26.8	21.6	21.2	9.06096	8.80272	8.71249	9.01267	8.8206	8.56582	9.08533	8.90633	8.61397	9.01582
1582	Q8NDA8;E9PHY8;Q8NDA8-2;Q8NDA8-7;Q8NDA8-3;G8JLL0;Q8NDA8-4;Q8NDA8-5;Q8NDA8-6	HEAT repeat-containing protein 7A	HEATR7A	0.249388	-0.950991	-1.20038	no	no	1.2821e-40	690640000	10	10	4	3	5	5	6	5	4	3	5	5	6	5	8.4	181.25	1641	4	4	5	7	8	4	3.8	3	4.6	4.3	5.4	3.8	7.99566	7.71222	7.67628	8.04364	7.58864	7.85603	8.04352	7.75385	7.73083	8.20561
3212	P21964;P21964-2;E7EMS6;E7EUU8;F8WBW9	Catechol O-methyltransferase	COMT	0.249344	0.0884234	-0.16092	no	no	3.2202e-220	24889000000	16	16	15	15	15	14	15	13	15	15	15	14	15	13	59.8	30.037	271	57	53	60	49	52	44	59.8	59.8	59.8	59.8	59.8	56.8	9.54567	9.36244	9.08246	9.55872	9.32199	9.18219	9.78289	9.59759	9.32362	9.52947
1722	Q14914;F5GY50;Q5JVP3;Q5JVP2;F2Z3J9;Q9H1X5	Prostaglandin reductase 1	PTGR1	0.249136	-1.91938	-2.16851	no	no	2.3364e-163	12478000000	11	11	10	11	9	10	11	10	10	11	9	10	11	10	37.1	35.869	329	48	54	53	58	48	48	37.1	37.1	33.4	33.4	37.1	33.4	9.26174	8.77111	9.09226	9.34388	8.79831	9.19835	9.32758	8.81926	9.16628	9.26557
4504	Q2M389;Q2M389-2;F8VYH7;F8W1W1;F8VNZ5	WASH complex subunit 7	KIAA1033	0.249113	0.173238	-0.0758749	no	no	4.0731e-148	6089500000	22	22	16	21	17	17	19	16	16	21	17	17	19	16	23.4	136.4	1173	44	50	45	38	47	41	17.2	22.4	18.2	18	19.9	17.6	8.94178	8.74974	8.49493	9.06179	8.81587	8.69763	8.9696	8.79603	8.48739	8.92891
1715	P20585;F5GXK1	DNA mismatch repair protein Msh3	MSH3	0.248989	-0.176578	-0.425567	no	no	1.2556e-21	417350000	4	4	4	3	4	3	3	4	4	3	4	3	3	4	6.7	127.41	1137	6	4	4	3	5	5	6.7	4.7	6.7	4.7	4.7	6.7	7.76266	7.58286	7.29288	7.76864	7.44451	7.48952	7.91153	7.72749	7.44988	7.35597
3368	P31751;Q0VAN0;B3KP61;B7Z8Z9;C9K000;Q6P4H3;E7EVP8;A8MX96;C9JIJ1;C9JC83	RAC-beta serine/threonine-protein kinase	AKT2	0.248814	-0.0278618	-0.276675	no	no	3.9506e-46	273950000	6	3	5	5	3	5	6	4	3	3	2	3	3	2	17.7	55.768	481	8	7	4	5	6	3	15.6	15.6	10.8	15.6	17.7	13.5	7.70915	7.46776	7.33895	7.66148	7.3996	7.31739	7.57893	7.35963	7.17716	7.61135
3974	P83111;P83111-2;H0YNN5	Serine beta-lactamase-like protein LACTB, mitochondrial	LACTB	0.248792	-0.359071	-0.607863	no	no	1.509e-192	4762700000	16	16	14	13	12	12	13	13	14	13	12	12	13	13	30.2	60.693	547	34	26	24	32	27	26	28.5	22.7	26.7	24.5	26.7	26.1	8.86852	8.64632	8.47112	8.68078	8.37705	8.38243	9.00169	8.78706	8.59269	9.0209
3347	P30414	NK-tumor recognition protein;Putative peptidyl-prolyl cis-trans isomerase	NKTR	0.248572	0.0471893	-0.201383	no	no	2.7964e-13	158730000	1	1	1	1	1	1	1	1	1	1	1	1	1	1	1.2	165.67	1462	3	3	2	3	2	3	1.2	1.2	1.2	1.2	1.2	1.2	7.50395	7.36012	6.95408	7.25974	7.02816	6.87599	7.44672	7.26124	6.98779	7.45902
1415	E7EVU8;Q7Z6Z7;Q7Z6Z7-3;E9PD66;Q7Z6Z7-2;H0Y5W0;Q5H962;H0Y659;F5H1P2;Q5H963	E3 ubiquitin-protein ligase HUWE1	HUWE1	0.248367	0.117568	-0.130799	no	no	0	20202000000	74	74	52	53	48	52	53	60	52	53	48	52	53	60	24.5	482.14	4376	102	110	104	98	115	117	16.7	17.8	16.3	17.7	17.3	20.3	9.41669	9.23533	8.94992	9.49557	9.25513	9.12411	9.55777	9.37827	9.08739	9.45344
677	Q99501;E7EQM6;B5MCR7;Q99501-2;Q99501-3	GAS2-like protein 1	GAS2L1	0.248313	0.0767215	-0.171591	no	no	2.1462e-28	339000000	2	2	2	2	2	1	2	2	2	2	2	1	2	2	2.8	72.716	681	3	5	5	2	5	4	2.8	2.8	2.8	2.8	2.8	2.8	7.51524	7.34561	7.0249	7.61076	7.36706	7.24366	7.96737	7.77029	7.52938	7.59342
2428	O15260;B7Z7A8;Q5T8U7;Q5T8U5;O15260-2;F5H7X6;B7Z6A4	Surfeit locus protein 4	SURF4	0.247855	0.105768	-0.142087	no	no	2.1938e-48	13810000000	7	7	6	7	7	5	6	6	6	7	7	5	6	6	30.1	30.394	269	18	21	17	17	18	18	24.2	30.1	30.1	21.6	24.2	24.2	9.2393	9.0566	8.7751	9.45858	9.22209	9.08171	9.29618	9.1271	8.80466	9.32805
5779	Q99569;Q99569-2;F8W7E2	Plakophilin-4	PKP4	0.247518	-0.803227	-1.05075	no	no	9.7527e-37	306080000	5	4	4	3	3	3	5	4	3	3	2	2	4	3	5.6	131.87	1192	5	4	3	4	3	3	4.6	4	3.2	3.2	5.6	4.6	7.91756	7.59302	7.63883	7.59232	7.21354	7.35721	7.74432	7.42904	7.45708	7.51199
498	Q9BT22;B4DP08	Chitobiosyldiphosphodolichol beta-mannosyltransferase	ALG1	0.246972	0.402779	0.155807	no	no	2.7543e-11	544320000	2	2	2	1	1	2	2	1	2	1	1	2	2	1	5	52.518	464	4	2	2	4	4	1	5	2.8	2.8	5	5	2.8	8.02857	7.85486	7.54668	7.94133	7.68522	7.59018	7.90507	7.76873	7.33552	8.05181
5126	Q8IYI6	Exocyst complex component 8	EXOC8	0.246835	-0.18002	-0.426855	no	no	1.9649e-104	3313500000	9	9	6	7	7	7	6	7	6	7	7	7	6	7	16.3	81.798	725	12	12	11	11	11	13	13.1	13.2	15.2	14.3	13.2	14.3	8.71974	8.51428	8.29598	8.70083	8.4205	8.37809	8.71095	8.50337	8.29066	8.82574
4869	Q6WCQ1-2;Q6WCQ1;Q6WCQ1-3;H0Y2S9;H0Y7E2;A8MW37;C9J9W5	Myosin phosphatase Rho-interacting protein	MPRIP	0.246724	-0.0411028	-0.287827	no	no	6.1876e-107	2012200000	26	25	14	17	14	15	15	18	13	17	14	14	14	17	31.5	118.1	1038	31	32	23	25	35	30	16.1	19.6	16.5	18.9	16.7	19.9	8.49013	8.26021	8.10401	8.58739	8.30298	8.26907	8.5064	8.29697	8.08913	8.40812
6370	Q9NVM4;Q9NVM4-3;Q9NVM4-2;Q9NVM4-4	Protein arginine N-methyltransferase 7	PRMT7	0.246692	0.357295	0.110603	no	no	5.0986e-32	334970000	3	3	2	1	3	2	1	3	2	1	3	2	1	3	9	78.458	692	2	1	3	2	1	3	6.2	2.6	9	6.2	2.6	9	7.74761	7.62615	7.13494	7.18546	6.90085	6.86738	7.91393	7.75162	7.40785	7.98014
4607	Q5C9Z4	Nucleolar MIF4G domain-containing protein 1	NOM1	0.246633	0.312939	0.0663065	no	no	5.8245e-36	372930000	5	5	2	3	2	3	3	3	2	3	2	3	3	3	8	96.256	860	3	4	2	3	4	5	4.2	5.6	4.2	5.2	5.6	5.6	7.31368	7.12791	6.85525	7.34524	7.11167	6.96431	7.46553	7.30127	6.96375	8.3724
2274	O94923;H0YNP1	D-glucuronyl C5-epimerase	GLCE	0.246597	-0.0790197	-0.325617	no	no	4.2641e-104	5972700000	14	14	11	11	10	9	12	10	11	11	10	9	12	10	29.2	70.1	617	29	31	29	28	34	27	19	19.8	17.8	16	25.8	17.5	9.09461	8.89091	8.66798	8.88983	8.62618	8.5479	8.98993	8.80041	8.53849	8.98257
1686	Q9Y6K5;F5GWB8;F8VS35;F8VWK9;H0YHL3;F8VW22	2-5-oligoadenylate synthase 3	OAS3	0.246485	-0.507719	-0.754203	no	no	1.8975e-22	312920000	6	6	3	3	4	2	3	4	3	3	4	2	3	4	9.6	121.17	1087	4	3	4	2	4	5	5.7	5.7	5.9	3.7	5.7	6.7	7.6058	7.35669	7.24578	7.59447	7.23449	7.34533	7.79155	7.54092	7.4335	7.57898
3476	P40939;B4DYP2;H0YFD6	Trifunctional enzyme subunit alpha, mitochondrial;Long-chain enoyl-CoA hydratase;Long chain 3-hydroxyacyl-CoA dehydrogenase	HADHA	0.246415	-0.0347791	-0.281194	no	no	0	59932000000	35	35	33	34	31	33	34	33	33	34	31	33	34	33	52.2	82.999	763	125	139	140	134	128	128	51.9	50.7	48.5	50.3	50.7	49.5	9.92402	9.73013	9.48045	9.98299	9.72134	9.63865	10.0549	9.86834	9.59808	9.93672
2647	O75525;O75525-2;E5RJZ9;H0YAQ3;H0YAQ1;E5RG12	KH domain-containing, RNA-binding, signal transduction-associated protein 3	KHDRBS3	0.246389	0.174214	-0.0721745	no	no	8.9006e-35	824830000	4	2	4	4	4	4	4	4	2	2	2	2	2	2	11.8	38.799	346	7	9	8	9	8	5	11.8	11.8	11.8	11.8	11.8	11.8	8.14251	7.96529	7.66767	8.09103	7.86754	7.69558	8.30417	8.11843	7.84571	7.97177
2520	O43854;O43854-2	EGF-like repeat and discoidin I-like domain-containing protein 3	EDIL3	0.246371	0.462654	0.216284	no	no	6.003e-83	2165000000	11	11	6	8	6	8	7	8	6	8	6	8	7	8	30.2	53.764	480	13	15	11	10	16	16	14.2	20.6	19.4	20.6	18.1	22.9	8.61695	8.47737	8.05607	8.49317	8.29112	8.06371	8.56493	8.43745	7.97041	8.4004
3658	P51116	Fragile X mental retardation syndrome-related protein 2	FXR2	0.24625	0.00831936	-0.237931	no	no	8.868e-73	408260000	9	5	6	5	4	5	6	5	3	3	2	2	2	3	14.9	74.222	673	5	5	3	5	5	6	11.9	7.6	9.2	8.5	9.7	9.1	7.94672	7.71344	7.56538	7.44929	7.18853	7.10387	7.78962	7.6108	7.31792	7.86215
4005	Q00610;Q00610-2;F5H5N6	Clathrin heavy chain 1	CLTC	0.246235	-0.143002	-0.389236	no	no	0	221890000000	92	70	84	84	83	86	86	81	63	64	64	64	65	62	60	191.61	1675	382	391	356	372	393	366	54.9	54.7	54.6	57.3	55.2	52.7	10.4833	10.2777	10.0598	10.528	10.2553	10.1966	10.5911	10.3966	10.1485	10.5093
1176	Q8IZ81;D6RBS5	ELMO domain-containing protein 2	ELMOD2	0.246232	0.00610106	-0.240131	no	no	1.0399e-53	879920000	4	4	3	2	4	3	3	2	3	2	4	3	3	2	13.3	34.96	293	13	10	6	8	15	8	10.2	6.8	13.3	10.2	10.2	6.8	8.26588	8.07265	7.8211	8.1936	7.97029	7.79786	7.86599	7.62724	7.49223	8.01837
2610	O75182;O75182-2;O75182-3	Paired amphipathic helix protein Sin3b	SIN3B	0.24618	0.200598	-0.0455827	no	no	1.3638e-97	522650000	7	7	3	6	4	5	5	4	3	6	4	5	5	4	10.8	133.06	1162	4	11	6	7	9	7	5.6	9.5	6.6	8	8.1	6.6	7.75737	7.59441	7.25273	7.87848	7.60723	7.54547	8.00625	7.83576	7.51775	7.99945
4182	Q13144;E9PC74;H0YGE6	Translation initiation factor eIF-2B subunit epsilon	EIF2B5	0.246015	0.311793	0.065778	no	no	3.2322e-44	1481800000	8	8	6	5	5	4	4	4	6	5	5	4	4	4	13.3	80.379	721	6	6	7	5	4	5	10.5	10	9.6	8.6	8.6	8.3	8.42073	8.28598	7.84683	8.44731	8.23378	8.03659	8.42053	8.26202	7.906	8.34901
32	E9PF32;H0YAY3;A2RUS2;A2RUS2-2;E5RI43;A2RUS2-3;B3KRG7;E5RIR7;C9JGX6;H0YBK9;A2RUS2-4;E5RJ42;H0YBH5	DENN domain-containing protein 3	DENND3	0.245381	-0.642378	-0.887759	no	no	2.4183e-46	710490000	8	8	4	6	3	6	5	6	4	6	3	6	5	6	9.6	144.32	1278	9	10	7	9	11	11	5.3	6.7	2.6	5.2	6.5	8.2	7.94142	7.68168	7.59476	7.91108	7.55422	7.65952	7.94617	7.72022	7.55432	7.96561
159	A8K9T0;Q9ULG6;Q9ULG6-2;Q9ULG6-4;Q9ULG6-3	Cell cycle progression protein 1	CCPG1	0.245216	0.188217	-0.0569997	no	no	1.2585e-59	893640000	9	9	7	7	7	8	7	8	7	7	7	8	7	8	11	93.487	807	12	11	10	15	13	13	9.2	9.2	9.2	10.2	9.2	10	8.00958	7.83016	7.53905	8.15836	7.93921	7.75635	8.27882	8.09954	7.80796	8.21788
360	Q9Y5X1;B3KXH8	Sorting nexin-9	SNX9	0.245187	-0.209516	-0.454702	no	no	7.8928e-149	8820000000	14	14	11	13	12	10	11	12	11	13	12	10	11	12	24.4	66.591	595	42	48	46	45	41	45	18.8	22.9	20.5	15.6	18.8	19.5	9.12169	8.90462	8.71649	9.2465	8.97179	8.91744	9.19731	8.98981	8.77689	9.03181
5070	Q8IVH8-3;Q8IVH8;Q8IVH8-2;F5H5A3;F8WAZ1;F8WBC3	Mitogen-activated protein kinase kinase kinase kinase 3	MAP4K3	0.245099	-0.434775	-0.679874	no	no	1.424e-132	826730000	5	5	4	5	4	3	4	4	4	5	4	3	4	4	11.3	98.953	873	8	10	8	6	9	8	8.1	11.3	10.1	8.7	10	10	8.12428	7.85909	7.78417	7.99947	7.67725	7.71864	8.18483	7.94406	7.81381	8.27379
6244	Q9NP84	Tumor necrosis factor receptor superfamily member 12A	TNFRSF12A	0.245054	1.14048	0.895422	no	no	6.6802e-05	454600000	1	1	1	1	1	1	1	1	1	1	1	1	1	1	7.8	13.911	129	4	3	3	3	3	3	7.8	7.8	7.8	7.8	7.8	7.8	7.8431	7.74511	7.14839	8.00983	7.89867	7.36357	7.6805	7.51866	7.17336	7.87186
4654	Q5SVK8;Q6XZF7;A8MU01;Q6XZF7-2;B4E0Q3;F5H5N8;Q5SVK9	Dynamin-binding protein	RP11-114F7.3;DNMBP	0.244982	0.155213	-0.0897694	no	no	2.3456e-199	3831900000	25	25	15	15	18	15	18	19	15	15	18	15	18	19	23.2	180	1601	39	40	38	45	44	43	13.3	13.6	14.7	13	18.7	16.5	8.7328	8.54836	8.27191	8.67723	8.43104	8.31342	8.84531	8.64682	8.4098	8.76497
5355	Q8TF47	Zinc finger protein 90 homolog	ZFP90	0.244666	-0.348686	-0.593351	no	no	1.3166e-30	140940000	1	1	1	1	1	1	1	1	1	1	1	1	1	1	3.5	73.03	636	2	2	2	1	2	2	3.5	3.5	3.5	3.5	3.5	3.5	7.44094	7.21075	7.05523	7.51407	7.20726	7.21877	7.47314	7.25358	7.07173	6.79804
817	Q16537;B7ZKK9	Serine/threonine-protein phosphatase 2A 56 kDa regulatory subunit epsilon isoform	PPP2R5E	0.244661	0.247679	0.0030184	no	no	2.6945e-59	3940800000	11	10	9	10	8	9	8	10	8	9	7	8	7	9	22.9	54.699	467	14	12	11	13	12	14	21	22.9	20.6	21	17.1	22.5	8.69685	8.44789	8.33664	8.87307	8.52389	8.61538	8.63454	8.3761	8.28628	8.64413
3818	P61018-2;P61018	Ras-related protein Rab-4B	RAB4B	0.244458	-0.499272	-0.74373	no	no	9.9215e-11	104570000	2	2	1	1	1	1	2	1	1	1	1	1	2	1	9.7	27.506	248	2	5	3	2	2	4	5.6	5.6	5.6	5.6	9.7	5.6	6.74293	6.49995	6.37488	7.42747	6.94205	7.25547	7.3175	6.89614	7.11059	7.00009
1772	Q8ND04-2;Q8ND04;F5H0N5;Q8ND04-3	Protein SMG8	SMG8	0.244188	0.0770867	-0.167101	no	no	8.4713e-55	1499900000	10	10	6	7	7	7	8	6	6	7	7	7	8	6	14.6	113.22	1023	19	19	21	15	27	14	8.6	9.7	10.6	10.3	10.9	8.6	8.34141	8.14345	7.90495	8.32052	8.05277	7.98346	8.31078	8.14448	7.81341	8.39097
5895	Q9BU23;Q9BU23-2;H0Y9R0;Q9BU23-3	Lipase maturation factor 2	LMF2	0.244187	0.344593	0.100407	no	no	6.714e-49	1455300000	8	8	5	7	6	3	4	4	5	7	6	3	4	4	13.3	79.697	707	6	8	7	5	7	5	8.2	11	9.2	5.9	7.8	6.9	8.39636	8.2448	7.86559	8.51276	8.30107	8.09913	8.41828	8.24554	7.93442	8.20564
2358	O14657;F8WCG1;H0Y7C8	Torsin-1B	TOR1B	0.24412	0.703616	0.459496	no	no	9.3387e-11	332050000	4	4	2	1	3	2	2	2	2	1	3	2	2	2	12.5	37.978	336	2	1	3	2	2	2	6.2	4.2	8.3	4.5	6.2	6.2	7.67553	7.53752	7.11049	7.67909	7.52432	7.15588	7.64916	7.47312	7.17193	7.75154
1592	E9PPM1;O14683;E9PKZ4;E9PIK4;E9PIN5;E9PQ46;E9PMW4;E9PS55;E9PKN9;E9PN66;E9PMY0;E9PNB3	Tumor protein p53-inducible protein 11	TP53I11	0.244096	0.118445	-0.125651	no	no	1.1421e-17	644510000	2	2	1	2	2	2	2	1	1	2	2	2	2	1	10.6	26.064	236	4	6	7	6	5	3	6.4	10.6	10.6	10.6	10.6	6.4	7.67077	7.49149	7.19995	8.1514	7.90078	7.79333	8.22461	8.03631	7.77096	8.14504
5648	Q96JH7	Deubiquitinating protein VCIP135	VCPIP1	0.243777	0.104046	-0.139731	no	no	4.9929e-48	549830000	8	8	3	2	3	1	1	6	3	2	3	1	1	6	9.2	134.32	1222	6	5	6	2	4	8	3.6	2	4.7	1.3	1.3	7.3	7.84476	7.66338	7.37802	7.9168	7.68389	7.53493	8.10254	7.89421	7.6835	7.52177
5730	Q96RQ3;E9PHF7;E7ETG7;E9PG35;G5E9X5;E7EX16;F5GYT8;F5H2T9	Methylcrotonoyl-CoA carboxylase subunit alpha, mitochondrial	MCCC1	0.24312	0.102341	-0.140779	no	no	2.5232e-79	667030000	7	7	5	5	3	5	4	6	5	5	3	5	4	6	16.1	80.472	725	9	9	7	9	8	11	11	13	7.4	13	9.9	15	8.04348	7.85722	7.58604	7.85678	7.5977	7.50932	7.97628	7.8106	7.47756	8.28785
2658	O75643;F5H447;F5H4C1;C9JAQ9;O75643-2;A2RRQ7;B4E0P5	U5 small nuclear ribonucleoprotein 200 kDa helicase	SNRNP200	0.242851	0.166292	-0.0765591	no	no	0	53515000000	82	82	65	68	66	61	69	73	65	68	66	61	69	73	44.4	244.5	2136	196	213	202	197	212	219	36	38.8	36.1	34.4	37.6	39.8	9.83214	9.65018	9.36652	9.96315	9.73955	9.56781	9.97682	9.79876	9.50361	9.85411
184	A8MU08;Q14185	Dedicator of cytokinesis protein 1	DOCK1	0.242333	-0.239276	-0.481609	no	no	3.4558e-116	2857500000	22	21	17	18	14	15	17	14	17	18	14	14	17	14	13.9	222.66	1931	42	48	31	41	42	38	10.7	11.5	9.8	9.6	11.4	9.1	8.7308	8.51248	8.3275	8.63846	8.3312	8.34357	8.64355	8.43183	8.22996	8.62878
3387	P33527-9;P33527;P33527-3;P33527-2;P33527-4;P33527-5;P33527-7;F5GXL7;P33527-6;P33527-8	Multidrug resistance-associated protein 1	ABCC1	0.240901	0.273186	0.0322854	no	no	7.4978e-90	2612300000	16	15	10	8	7	7	11	10	10	8	7	6	11	9	14.7	172.64	1541	28	24	24	20	29	27	10.3	7.8	7	6.1	9.8	8.1	8.66793	8.48769	8.19899	8.54654	8.313	8.16557	8.69162	8.5252	8.19449	8.49592
5918	Q9BVA0	Katanin p80 WD40-containing subunit B1	KATNB1	0.240643	-0.160875	-0.401518	no	no	6.9154e-12	162280000	4	4	3	3	3	2	2	1	3	3	3	2	2	1	12.7	72.333	655	2	1	3	1	2	2	8.1	8.1	10.8	6.3	6.3	4.7	7.37497	7.18597	6.92257	7.01982	6.70259	6.73442	7.74084	7.52697	7.33066	7.10133
3641	P50454;B4DN87;E9PPV6;E9PR70;E9PMI5;E9PK86;E9PKH2;E9PNX1;E9PRS3;E9PIG2;E9PJH8;E9PQ34;E9PLA6;H0YEP8	Serpin H1	SERPINH1	0.240505	0.552495	0.31199	no	no	0	172180000000	27	27	26	25	26	25	23	25	26	25	26	25	23	25	63.4	46.44	418	193	201	214	186	172	183	63.2	61.2	61.5	58.4	58.6	61.5	10.441	10.3046	9.87171	10.4413	10.2648	9.96515	10.5919	10.4436	10.0532	10.3458
4541	Q460N5;Q460N5-1;Q460N5-4;Q460N5-3;Q460N5-5	Poly [ADP-ribose] polymerase 14	PARP14	0.239716	0.159331	-0.0803848	no	no	3.8683e-115	1485300000	14	14	9	9	6	7	8	10	9	9	6	7	8	10	10.8	202.8	1801	14	16	10	13	15	16	7.6	7.4	5.2	6.3	7.4	9.2	8.29964	8.12665	7.81624	8.37206	8.1821	7.92143	8.46042	8.29861	7.95318	8.3813
2370	Q4LE60;O14787-2;O14787;F5H8J7;E7EM99	Transportin-2	TNPO2 variant protein;TNPO2	0.23943	0.343879	0.104449	no	no	2.2274e-82	654500000	11	5	10	10	9	8	7	9	4	4	5	3	3	4	14.5	117.68	1051	9	8	9	8	8	9	13	13	13.5	10.1	9.8	12.4	7.99887	7.83287	7.50085	7.84057	7.61906	7.44212	8.27953	8.08959	7.82885	8.08146
5173	Q8TBP0;Q8N3Z4	TBC1 domain family member 16	TBC1D16	0.239207	0.323877	0.0846702	no	no	1.7944e-06	112120000	1	1	1	1	1	1	1	1	1	1	1	1	1	1	1.4	86.371	767	6	6	6	6	7	6	1.4	1.4	1.4	1.4	1.4	1.4	7.30348	7.15106	6.77475	7.07788	6.78995	6.76336	7.3248	7.13165	6.87992	7.29922
3158	P17858;P17858-2;F5H3H2;E9PDI3;H0YIX6	6-phosphofructokinase, liver type	PFKL	0.23899	-0.208642	-0.447632	no	no	6.6713e-229	19173000000	25	21	22	22	20	21	24	20	18	18	16	17	20	16	41.8	85.018	780	44	49	41	48	43	41	37.4	38.2	37.2	37.1	40.8	32.7	9.40717	9.18316	9.01246	9.48083	9.16864	9.19067	9.45962	9.25188	9.03961	9.49697
5295	Q8NI27;E9PHG2;H0Y815;REV__O95202;Q8NI27-2;H0Y7U4;H0Y594;B7ZBA0;F2Z2V2	THO complex subunit 2	THOC2	0.238642	0.0297501	-0.208892	no	no	1.4421e-145	4420900000	23	23	14	16	14	15	16	18	14	16	14	15	16	18	20.1	182.77	1593	29	41	27	31	39	37	13.4	14.8	13	13.4	15.6	16	8.7325	8.49664	8.35476	8.82525	8.57136	8.47134	8.84075	8.6445	8.40133	8.74773
1821	Q15436;F5H365;F5H6C4;B3KXI2;E7ES38;G3V531;G3V2R6;G3V3G5;G3V1W4;G3V4V1;G3V4Q2;G3V5X8;G3V299;G3V5K1	Protein transport protein Sec23A	SEC23A	0.238501	-0.258217	-0.496718	no	no	0	24558000000	27	24	24	25	24	25	24	26	21	22	21	22	21	23	46.5	86.16	765	86	95	78	83	87	82	41.2	43.3	43	43.4	42.1	44.4	9.59004	9.38259	9.16953	9.57397	9.28596	9.25955	9.62612	9.41862	9.20575	9.58667
2012	O14936;O14936-2;F8W998;O14936-6;O14936-4;O14936-3;Q5JS74;O14936-5;Q5JS72	Peripheral plasma membrane protein CASK	CASK	0.238375	-0.0476779	-0.286053	no	no	1.1e-13	336170000	4	4	2	3	3	3	4	3	2	3	3	3	4	3	4.9	105.12	926	4	7	9	8	9	5	2.4	3.1	3.1	4.1	4.9	3.1	7.51516	7.32826	7.05884	7.89441	7.61949	7.5656	7.81642	7.62403	7.37014	7.52124
4679	Q5T4S7-2;Q5T4S7;Q5T4S7-4;Q5T4S7-3;Q5T4S7-5;B4DYV5;B4DPF6;Q5TBN9;Q5T4S7-6	E3 ubiquitin-protein ligase UBR4	UBR4	0.238219	0.173612	-0.064607	no	no	0	15463000000	77	77	51	52	58	49	50	51	51	52	58	49	50	51	18.9	575.95	5204	99	102	101	96	103	93	12.5	12.8	14.4	12	12.5	11.6	9.38982	9.20317	8.93305	9.40125	9.15244	9.04088	9.44447	9.26304	8.97782	9.30999
6352	Q9NUY8;Q9NUY8-2;E9PGE5;C9JAM5;C9IZ32	TBC1 domain family member 23	TBC1D23	0.238186	0.208628	-0.0295589	no	no	9.1697e-40	2211900000	5	5	4	5	4	4	4	4	4	5	4	4	4	4	10.7	78.321	699	13	14	11	15	14	10	8.7	10.7	8.7	8.7	8.7	8.7	8.50842	8.33606	8.02375	8.47855	8.24334	8.09992	8.63348	8.45583	8.15942	8.53567
1935	Q8IUH5;Q8IUH5-3;H0YIK0;F8VPW2	Palmitoyltransferase ZDHHC17	ZDHHC17	0.238182	0.128488	-0.109695	no	no	6.2904e-14	212550000	2	2	2	2	2	2	2	2	2	2	2	2	2	2	2.2	72.639	632	3	3	3	4	3	3	2.2	2.2	2.2	2.2	2.2	2.2	7.41216	7.25191	6.90147	7.41604	7.15643	7.06926	7.78107	7.61323	7.28695	7.5922
4095	Q08357	Sodium-dependent phosphate transporter 2	SLC20A2	0.237801	-0.139601	-0.377401	no	no	3.2979e-29	276490000	2	2	2	1	2	1	2	2	2	1	2	1	2	2	3.5	70.392	652	3	2	3	2	3	3	3.5	3.5	3.5	3.5	3.5	3.5	7.58444	7.39644	7.13021	7.50564	7.27923	7.11444	7.69549	7.45023	7.33045	7.92214
6886	Q9Y4I1;Q9Y4I1-2;F8WE88;F5H363;E7ERV5	Unconventional myosin-Va	MYO5A	0.237523	-0.661111	-0.898634	no	no	0	318970000	55	2	39	44	36	42	43	51	1	2	2	2	2	2	33.2	215.4	1855	3	4	2	4	4	3	23.7	26.5	22	24.3	25.3	30.8	7.59376	7.36352	7.20815	7.65468	7.30432	7.39794	7.83035	7.50923	7.54852	7.78672
1658	Q5EG05;Q5EG05-2;E9PQW1	Caspase recruitment domain-containing protein 16	CARD16	0.237399	-0.0657101	-0.303109	no	no	3.3333e-08	281800000	2	1	2	2	2	2	2	2	1	1	1	1	1	1	9.1	22.625	197	3	4	4	5	3	5	9.1	9.1	9.1	9.1	9.1	9.1	7.70233	6.93328	7.6213	7.04524	6.75399	6.7342	7.87237	7.11817	7.78823	7.93348
4713	Q5THK1;Q5THK1-4;Q5THK1-2;Q5THK1-3;C9J9V0;Q9BWN1;H0Y2P4	Protein PRR14L	PRR14L	0.237279	0.725184	0.487905	no	no	4.9082e-10	341500000	5	5	2	2	2	3	2	4	2	2	2	3	2	4	3.7	237.3	2151	4	2	2	5	2	6	1.5	1.5	1.5	2.7	1.5	2.5	7.83705	7.68316	7.3118	7.65447	7.50966	7.10711	7.78907	7.62777	7.28076	7.77613
1884	F5H6I0;P61769;H0YLF3	Beta-2-microglobulin;Beta-2-microglobulin form pI 5.3	B2M	0.237167	-0.521051	-0.758218	no	no	1.194e-70	19531000000	5	5	4	4	4	4	5	4	4	4	4	4	5	4	50.8	13.972	122	41	35	37	40	37	36	36.9	36.9	36.9	36.9	50.8	36.9	9.44994	9.18498	9.10958	9.5252	9.19112	9.25486	9.48676	9.22253	9.14551	9.61053
6141	Q9H6R6;Q9H6R6-2	Palmitoyltransferase ZDHHC6	ZDHHC6	0.236716	0.251945	0.0152284	no	no	1.2307e-05	80633000	2	2	2	1	2	1	2	1	2	1	2	1	2	1	4.1	47.662	413	3	1	4	2	5	2	4.1	1.7	4.1	1.7	4.1	1.7	7.12956	6.95135	6.65668	6.65401	6.42936	6.26024	7.17618	7.01275	6.6726	6.97514
5906	Q9BUQ8;H0YIL9;F8VVA2;H0YI52	Probable ATP-dependent RNA helicase DDX23	DDX23	0.236596	-0.0640551	-0.300651	no	no	3.7536e-106	7425600000	19	19	17	15	15	16	15	18	17	15	15	16	15	18	25.7	95.581	820	40	34	37	37	35	43	23.7	18.7	21.1	19.9	18.4	24.6	8.93124	8.7259	8.50729	8.93859	8.65319	8.62134	9.06752	8.80732	8.72144	9.24856
1730	F8VYA6;Q9NRL3;F5GYK2;B4DQH7	Striatin-4	STRN4	0.236435	0.0886076	-0.147828	no	no	7.0773e-32	840260000	8	6	4	5	5	6	5	8	2	4	3	4	3	6	17.4	81.265	760	5	6	4	6	6	7	8.7	11.3	10.9	12.6	10.4	17.4	7.64822	7.47603	7.16319	8.06867	7.85791	7.65358	8.04246	7.86928	7.55948	8.16044
6787	Q9Y2D4;Q9Y2D4-2	Exocyst complex component 6B	EXOC6B	0.236257	0.0207648	-0.215492	no	no	1.5635e-34	1048900000	8	7	5	5	7	5	6	6	4	4	6	4	5	5	11.2	94.2	811	6	4	10	6	9	7	8.5	8.4	10.2	8.5	8.5	9.4	8.11029	7.90419	7.68757	7.90006	7.60749	7.59041	8.35849	8.16536	7.91355	8.26661
279	E9PEH2;Q92540-4;E9PD50;E9PCI0;Q92540;Q92540-2;E9PCE5;B1ALB4;E9PEK3;E9PBK2	Protein SMG7	SMG7	0.236125	0.244546	0.00842093	no	no	7.7062e-11	188920000	2	2	2	2	1	2	2	2	2	2	1	2	2	2	2	131.65	1178	2	3	1	3	3	2	2	2	1.1	2	2	2	7.30837	7.12424	6.84692	7.73691	7.53314	7.31035	7.20052	7.08721	6.56154	7.48087
1512	Q9H6S0;E9PE26;D6RA70	Probable ATP-dependent RNA helicase YTHDC2	YTHDC2	0.236097	0.238783	0.00268593	no	no	1.7632e-46	974570000	12	12	3	6	6	3	6	9	3	6	6	3	6	9	11.1	160.25	1430	6	11	8	7	11	13	2.8	5.5	5.8	3.1	5.9	8.3	8.06848	7.88197	7.61149	8.31591	8.10175	7.90618	8.2393	8.05254	7.7827	8.02086
6168	Q9H8M2;B4DMQ2;Q9H8M2-1;Q9H8M2-3;Q9H8M2-2	Bromodomain-containing protein 9	BRD9	0.235501	-0.10044	-0.335941	no	no	2.5127e-44	344860000	5	5	1	4	4	3	2	3	1	4	4	3	2	3	15.6	66.999	597	2	5	6	5	4	4	2.7	12.4	11.9	8.7	6	9	7.27912	7.07467	6.85369	7.81307	7.52821	7.49525	8.09628	7.89557	7.66459	7.62713
257	B0V043;P26640;H0Y4A6;E7EVJ6;B4DZ61;Q5SP20;H0Y426;A2ABF4;B0V044;H0Y3X9	Valine--tRNA ligase	VARS	0.235361	0.0371179	-0.198243	no	no	0	21238000000	38	38	29	33	32	30	32	33	29	33	32	30	32	33	33.2	140.46	1264	63	64	70	65	74	68	26.3	29.9	29.3	26.1	28.2	28.8	9.43645	9.22134	9.02821	9.54373	9.27809	9.20417	9.57543	9.39058	9.11531	9.45057
6302	Q9NRW7;B7Z5E4;F5H8K1;F5GYC3;Q5T4Q0	Vacuolar protein sorting-associated protein 45	VPS45	0.235171	0.0129849	-0.222186	no	no	8.1493e-52	826080000	6	6	2	5	4	4	5	5	2	5	4	4	5	5	15.8	65.076	570	3	7	8	4	7	7	5.3	14	11.6	9.8	13.3	13.3	7.71253	7.54825	7.21077	8.28158	8.02102	7.93593	8.28979	8.09999	7.83888	7.83809
6198	Q9HAU5;Q9HAU5-2;F8W880	Regulator of nonsense transcripts 2	UPF2	0.23456	0.419411	0.184851	no	no	7.3495e-155	2745500000	12	12	7	9	11	8	12	11	7	9	11	8	12	11	12.9	147.81	1272	18	19	21	19	23	22	8.6	10.1	11.6	9.4	12.9	11.6	8.59305	8.44284	8.05903	8.43533	8.20871	8.04446	8.80144	8.64865	8.2736	8.67848
138	P49184;A6QRJ0;Q5HY40;E7EUJ0;E7ESG1	Deoxyribonuclease-1-like 1	DNASE1L1	0.234514	0.0698562	-0.164658	no	no	7.431e-34	590230000	4	4	2	1	4	2	3	3	2	1	4	2	3	3	15.6	33.892	302	2	1	4	2	3	3	12.9	6	15.6	12.9	12.9	12.9	7.98351	7.75313	7.59806	7.44042	7.1848	7.08867	8.1312	7.95813	7.64799	8.06427
2029	Q9P2Q2;F8WAN4;Q5T376;Q5T378	FERM domain-containing protein 4A	FRMD4A	0.234266	0.0327576	-0.201508	no	no	5.3669e-17	1039400000	3	3	3	3	2	3	3	3	3	3	2	3	3	3	3.5	115.46	1039	10	7	6	7	7	9	3.5	3.5	2.2	3.5	3.5	3.5	8.28262	8.08629	7.84337	8.10792	7.87756	7.72242	8.15354	7.93806	7.74589	8.36627
2594	O75110;O75110-2	Probable phospholipid-transporting ATPase IIA	ATP9A	0.233961	-0.363451	-0.597412	no	no	1.1276e-59	712070000	7	5	4	5	3	4	4	5	3	3	2	3	3	3	8	118.58	1047	3	4	3	7	5	6	5.1	6.4	4.2	5.3	5.3	6.1	7.99137	7.74592	7.6266	7.99869	7.70344	7.6918	8.00843	7.78707	7.60973	8.19243
6183	Q9H9E3;Q9H9E3-3;B4DDL2;Q9H9E3-2;E9PQ72;E9PQK0	Conserved oligomeric Golgi complex subunit 4	COG4	0.233755	0.160895	-0.0728604	no	no	7.4717e-66	779960000	9	9	4	5	5	7	6	6	4	5	5	7	6	6	13.6	89.082	785	5	7	10	8	14	11	6.1	9.2	8.5	10.3	8.8	9.2	7.80762	7.62151	7.34986	8.11985	7.88652	7.73857	8.16634	8.01064	7.64528	7.94939
4038	Q02318;C9J1K5	Sterol 26-hydroxylase, mitochondrial	CYP27A1	0.233282	-1.25405	-1.48733	no	no	2.5999e-29	361840000	4	4	4	3	1	3	4	3	4	3	1	3	4	3	8.1	60.234	531	7	6	2	5	7	5	8.1	8.1	4	8.1	8.1	8.1	7.81694	7.52796	7.50353	7.78526	7.4218	7.5388	7.76975	7.42067	7.51199	7.6459
509	P28300;B4DQF8;H0YAL3	Protein-lysine 6-oxidase	LOX	0.23309	1.20427	0.971176	no	no	1.443e-109	2699900000	7	7	5	7	6	4	5	4	5	7	6	4	5	4	21.1	46.944	417	13	15	13	15	13	13	16.3	21.1	18	12.5	16.3	12.5	8.68161	8.59027	7.95959	8.71137	8.57977	8.12872	8.76191	8.66273	8.07192	8.58522
2226	Q8N699;H0YDV5	Myc target protein 1	MYCT1	0.23292	-0.422341	-0.65526	no	no	1.2906e-17	1052200000	3	3	3	3	3	3	3	2	3	3	3	3	3	2	17	26.592	235	3	3	3	3	3	2	17	17	17	17	17	11.9	8.31983	8.04968	7.98557	8.37385	8.03145	8.11059	8.11348	7.82768	7.79664	8.19634
3068	P13639;B4DPU3;F5H370;F5GZG3;B4DMC6	Elongation factor 2	EEF2	0.232916	0.264582	0.0316659	no	no	0	551400000000	61	60	54	57	57	55	54	57	53	56	56	54	53	56	72.1	95.337	858	391	419	374	441	399	404	66.8	71.3	70.4	67	68.2	68.4	10.9424	10.7878	10.4189	10.9228	10.7092	10.5124	10.9446	10.7935	10.4127	10.9861
6222	Q9HCE1;Q5JR04;Q9HCE1-2;Q9H8T8	Putative helicase MOV-10	MOV10	0.232814	-0.510658	-0.743472	no	no	3.3492e-157	5682700000	25	25	15	19	15	14	17	15	15	19	15	14	17	15	34.4	113.67	1003	32	35	34	33	34	34	21.6	25.7	22.6	21.5	25.2	21.9	8.81175	8.56424	8.44966	8.93586	8.58954	8.67585	9.02816	8.77053	8.67895	8.94376
5911	Q9BV20;Q9BV20-2	Methylthioribose-1-phosphate isomerase	MRI1	0.232804	-0.645333	-0.878137	no	no	3.471e-24	808850000	7	7	4	3	3	3	4	5	4	3	3	3	4	5	24.9	39.149	369	5	4	5	5	5	7	13.8	11.9	13	9.8	12.7	16.8	8.1209	7.85383	7.78301	8.00753	7.67109	7.73922	7.90836	7.55694	7.65249	8.13704
142	A8CG34;Q96HA1;A8MXF9;Q96HA1-3;A8CG34-2;Q96HA1-2;A6NF01;C9J370;Q6PJE2;C9JER0;F6STJ3	Nuclear envelope pore membrane protein POM 121C;Nuclear envelope pore membrane protein POM 121;Putative nuclear envelope pore membrane protein POM 121B	POM121C;POM121;POM121B	0.232723	-0.118227	-0.35095	no	no	6.7708e-41	372690000	5	5	2	3	2	4	3	3	2	3	2	4	3	3	10.8	125.06	1229	3	4	2	4	3	3	3.3	4.6	4	7.9	4.6	6.2	7.78188	7.56398	7.37794	7.79378	7.48907	7.4964	7.64639	7.44383	7.21783	7.86349
4796	Q6N069;Q6N069-2;Q6N069-3;Q6N069-4;Q6N069-5	N-alpha-acetyltransferase 16, NatA auxiliary subunit	NAA16	0.232495	-0.131853	-0.364348	no	no	9.0768e-79	438790000	13	6	10	11	8	10	10	10	4	5	3	5	5	4	17.6	101.46	864	7	6	4	7	8	6	11.1	13.2	9.4	12.2	13.7	11.2	7.76636	7.55627	7.35017	7.90125	7.59351	7.60682	7.66906	7.44132	7.2798	8.0221
701	B5TJY2;Q96AC1;Q96AC1-2;H0YJ34;G3V281;G3V5R2;G3V3J0;H0YJB6;Q9BQL6;F8W9F0;Q9BQL6-2;Q9BQL6-4;G3V1L6;Q5JWV4	Fermitin family homolog 2	FERMT2	0.232307	-0.00977716	-0.242084	no	no	0	29081000000	34	33	29	29	31	29	31	30	28	29	30	29	30	30	51.8	78.675	687	66	77	59	75	70	65	40	38.7	47.9	40.9	47	42.9	9.65334	9.38993	9.31112	9.62906	9.30835	9.34686	9.61185	9.31256	9.30908	9.84259
3070	P13674;P13674-2;C9JL12	Prolyl 4-hydroxylase subunit alpha-1	P4HA1	0.232019	0.068907	-0.163112	no	no	5.213e-133	8052300000	20	20	15	18	17	16	16	15	15	18	17	16	16	15	39.3	61.049	534	49	62	53	54	52	59	30.7	34.8	33.5	32.2	31.5	27.5	9.04112	8.84808	8.59602	9.15336	8.90719	8.78955	9.13395	8.95088	8.67042	9.08927
3393	P34059;F5H325	N-acetylgalactosamine-6-sulfatase	GALNS	0.231888	-0.138945	-0.370834	no	no	1.5658e-33	816470000	5	5	3	5	4	4	4	3	3	5	4	4	4	3	19	58.025	522	10	13	9	11	10	4	7.3	19	14.2	14.2	14.2	7.3	8.08037	7.86065	7.67926	8.12297	7.86282	7.77678	8.29112	8.0844	7.86947	8.29778
5927	Q9BVJ7	Dual specificity protein phosphatase 23	DUSP23	0.231732	-0.0169242	-0.248656	no	no	8.1043e-55	2628900000	12	12	7	10	8	8	7	8	7	10	8	8	7	8	96	16.588	150	11	15	13	14	9	12	54.7	82.7	66	62	57.3	66	8.47826	8.26909	8.06058	8.76513	8.50172	8.42292	8.58705	8.38077	8.16465	8.59763
725	O75582;B7Z2Y5;O75582-2	Ribosomal protein S6 kinase alpha-5;Ribosomal protein S6 kinase	RPS6KA5	0.231619	-0.975337	-1.20696	no	no	1.1461e-14	377260000	4	3	3	4	3	4	3	3	2	3	3	3	2	3	6.6	89.864	802	5	6	5	6	4	4	4.2	6.6	5.6	6.6	4.2	5.6	7.60042	7.30378	7.29495	7.6844	7.26214	7.47803	7.77207	7.50154	7.43823	8.07434
207	P19022;A8MWK3;C9J8J8;C9J126	Cadherin-2	CDH2	0.230063	0.272193	0.0421299	no	no	4.0698e-46	1043300000	8	7	7	5	5	5	4	5	6	5	5	4	4	4	15.3	99.808	906	11	8	10	8	5	5	12.5	9.1	10.9	9.8	8.1	7	8.38917	8.22771	7.8812	8.15779	7.96562	7.71112	8.35951	8.17632	7.89622	8.27189
5486	Q93052;C9JUT4;C9JXK9;C9J4E3;C9J5C8;C9J1K7;C9J3U9;C9JT42;C9JIY7;C9J2R5;C9JE51	Lipoma-preferred partner	LPP	0.229975	-0.183836	-0.413811	no	no	8.6761e-217	14865000000	17	17	14	14	13	13	15	14	14	14	13	13	15	14	36.9	65.746	612	38	34	33	33	33	39	31.2	28.1	29.1	31	33.3	33.5	9.25708	9.03786	8.85514	9.47821	9.21535	9.13532	9.42936	9.2403	8.97706	9.23739
719	Q6ZVM7;B7Z2L7;Q6ZVM7-2;Q6ZVM7-3;F5H3S6;B7Z2U2;F5GXH5;Q6ZVM7-4	TOM1-like protein 2	TOM1L2	0.229964	0.35299	0.123025	no	no	1.414e-74	1393500000	6	6	3	4	4	4	3	4	3	4	4	4	3	4	23.5	55.556	507	4	6	5	6	4	6	13.4	14.8	14.4	18.3	13.4	14.8	8.25161	8.09107	7.74163	8.40773	8.17035	8.03209	8.41196	8.20575	7.98945	8.52111
1345	E7EW49;E7ERI8;F5H604;E3W994;O75122;E9PBA6;F5H3X0;E7ENG2;B3KR06;O75122-2;D6RBU8;C9J668	CLIP-associating protein 2	CLASP2	0.229605	0.0165995	-0.213005	no	no	2.7564e-162	1724000000	20	19	13	12	15	14	15	16	13	12	15	13	14	15	17.1	165.7	1514	18	19	20	21	20	24	13.4	11.8	13.3	11	13.6	13.6	8.37038	8.19117	7.89945	8.25782	7.99938	7.90959	8.54456	8.35048	8.10133	8.48342
2523	O43896	Kinesin-like protein KIF1C	KIF1C	0.229376	0.389546	0.160169	no	no	8.8085e-91	667830000	12	9	7	7	4	9	7	6	5	5	2	6	5	4	16	122.95	1103	8	7	3	7	8	6	7.3	8.9	5.6	11.3	9.4	7.2	8.08425	7.91594	7.59113	8.01611	7.78269	7.63498	7.50355	7.34027	6.99961	8.13322
1340	O95671;O95671-2;F5GXH4;E7ER97	N-acetylserotonin O-methyltransferase-like protein	ASMTL	0.229065	-0.63812	-0.867185	no	no	8.3465e-79	2464000000	12	12	6	10	9	7	9	7	6	10	9	7	9	7	21.7	68.856	621	19	24	25	18	24	15	10	19.5	16.4	8.7	16.4	14.2	8.51731	8.2539	8.17513	8.69553	8.38949	8.39948	8.76768	8.49698	8.43403	8.53094
48	Q6UWP7;A6H8Z7;Q6UWP7-2;C9K0C3;C9J6F4;C9JXY8;C9JUV9;C9JMW2;C9JA02;C9J5S5	Lysocardiolipin acyltransferase 1	LCLAT1	0.228877	0.215379	-0.013498	no	no	1.5045e-08	147620000	3	3	1	2	2	3	3	2	1	2	2	3	3	2	9.4	48.92	414	5	5	5	7	7	7	1.7	6.3	4.8	9.4	9.4	6.3	6.68484	6.51278	6.19954	7.01389	6.54393	6.83418	7.44982	7.22701	7.05327	7.59449
5049	Q86YR5;Q86YR5-4;Q86YR5-3;Q86YR5-2	G-protein-signaling modulator 1	GPSM1	0.228858	-0.183328	-0.412185	no	no	1.5962e-25	478500000	4	4	4	3	3	3	4	4	4	3	3	3	4	4	8.9	74.509	675	7	7	6	4	6	5	8.9	5.5	5.5	5.5	8.9	8.9	7.98894	7.74618	7.62057	7.81719	7.52673	7.50533	7.90609	7.68496	7.50706	7.83186
4122	Q10472;F5GY99;Q8IUC8-2;Q10472-2	Polypeptide N-acetylgalactosaminyltransferase 1;Polypeptide N-acetylgalactosaminyltransferase 1 soluble form	GALNT1	0.228785	1.00578	0.776998	no	no	5.3545e-125	4791400000	16	12	12	12	14	10	12	13	11	10	12	9	10	9	46.7	64.218	559	19	18	18	17	16	14	33.1	33.1	43.1	27.9	37	35.4	8.84733	8.73774	8.19565	8.94998	8.77009	8.48035	9.03113	8.92358	8.37236	8.86636
1152	D3YTA9;P63098;F6U1T9	Calcineurin subunit B type 1	PPP3R1	0.228784	-0.208018	-0.436802	no	no	2.1429e-06	165610000	2	2	2	2	2	2	2	2	2	2	2	2	2	2	20.1	21.445	189	2	3	2	2	2	2	20.1	20.1	20.1	20.1	20.1	20.1	7.38995	7.14439	7.02531	7.39988	7.16349	7.02288	7.45333	7.14662	7.15791	7.46516
3367	P31749;B7Z5R1;G3V3K5;G3V3X1;G3V2I6;G3V4I6;C9J258	RAC-alpha serine/threonine-protein kinase	AKT1	0.228569	-0.257373	-0.485942	no	no	1.2419e-122	2716900000	14	10	11	12	11	9	12	9	8	9	9	6	8	6	34	55.686	480	20	20	15	20	19	16	25.6	29.2	28.3	24	28.8	20.6	8.64499	8.42454	8.24494	8.56318	8.28081	8.24267	8.75987	8.52678	8.37829	8.84411
6041	Q9GZV5;C9J038;C9JR84;C9J337;C9JQS8	WW domain-containing transcription regulator protein 1	WWTR1	0.228509	-0.20989	-0.438399	no	no	3.0578e-67	3610500000	8	8	5	6	6	5	5	6	5	6	6	5	5	6	25.2	44.101	400	14	11	13	12	15	13	19	21.2	21	19	16.2	23.2	8.84668	8.61382	8.46476	8.75276	8.47406	8.42818	8.74635	8.49403	8.39044	8.65151
68	Q9BTX1;Q9BTX1-2;G3XA81;A6NEN1;Q9BTX1-3;B4DZG6;Q9BTX1-4	Nucleoporin NDC1	TMEM48	0.22729	0.0613459	-0.165944	no	no	3.6601e-21	227020000	3	3	2	1	2	2	2	2	2	1	2	2	2	2	5.5	76.304	674	3	1	3	5	3	2	3	1.3	4.2	3	3	3	7.31042	7.15363	6.79189	6.53519	6.30094	6.15521	7.76967	7.60365	7.27168	7.7552
4807	Q8TCT0;Q6NX59	Ceramide kinase	CERK	0.226981	0.0451784	-0.181802	no	no	6.2089e-96	131720000	3	3	2	2	3	2	2	2	2	2	3	2	2	2	3.9	59.977	537	7	7	7	6	7	7	2.6	2.6	3.9	2.6	2.6	2.6	7.3759	7.17513	6.94426	7.08672	6.81226	6.7574	7.47372	7.30636	6.9786	7.36337
3102	P15151;P15151-4;P15151-2;P15151-3	Poliovirus receptor	PVR	0.226876	0.878666	0.65179	no	no	7.7585e-56	3563000000	6	6	6	5	5	6	6	5	6	5	5	6	6	5	17	45.302	417	15	11	15	10	9	12	17	15.3	15.1	17	17	15.3	8.88826	8.7613	8.29219	8.76105	8.62333	8.19524	8.70356	8.56869	8.12998	8.59443
3919	P63000-2;P63000;P17081;G3V4H1;B1AH79;F8WET9	Ras-related C3 botulinum toxin substrate 1	RAC1	0.226648	-0.153416	-0.380064	no	no	9.7429e-84	10697000000	11	3	10	10	10	11	10	10	3	2	2	3	2	2	47.4	23.467	211	9	8	13	14	11	11	43.6	46.9	46.9	47.4	46.9	46.9	9.20806	9.00035	8.78804	9.19282	8.92476	8.85609	9.23694	9.02825	8.81851	9.24396
4317	Q14498;Q14498-2;A2RRD3;G3XAC6;E1P5S2;Q5QP23;Q5QP21;Q5QP22;Q86U06;Q86U06-2;Q86U06-5;E7EU28;Q86U06-4;G3XAP0;H0YJJ3;G3V5Z6;A8MYG5;F2Z2Z5;F8WF24;Q86U06-3;G3V546;F8WF73;F2Z3E6	RNA-binding protein 39	RBM39	0.226636	0.0999272	-0.126709	no	no	1.3082e-204	869610000	18	5	17	15	15	15	18	13	5	4	3	4	5	2	39.8	59.379	530	9	7	4	8	10	3	39.8	33.4	39.6	32.8	39.8	34	8.25522	8.0545	7.82353	8.02222	7.7001	7.7413	8.07081	7.88172	7.61861	8.26776
1471	E9PC62;O95319-3;O95319-4;O95319;Q5VZZ6;O95319-2;O95319-5;B4DIB6	CUGBP Elav-like family member 2	CELF2;CUGBP2	0.226464	0.601343	0.374879	no	no	1.7129e-37	543140000	7	6	4	3	5	3	5	3	3	3	5	2	4	2	16.1	55.731	521	4	6	7	5	6	3	11.1	6.1	11.1	7.7	11.1	5.2	7.98778	7.82831	7.47535	7.78613	7.61366	7.30166	8.17679	8.04159	7.60409	7.7873
1791	Q9HA65;F5H1W7	TBC1 domain family member 17	TBC1D17	0.226065	-0.308594	-0.534659	no	no	3.6663e-32	156560000	3	3	2	2	2	2	3	2	2	2	2	2	3	2	9.7	72.727	648	2	3	3	2	3	3	7.4	7.4	7.4	7.4	9.7	7.4	7.16634	6.85648	6.87397	7.20656	6.91122	6.89974	7.70952	7.5085	7.27836	7.30207
1926	Q8TB24;F6V054;Q8TB24-4;G3V2I7	Ras and Rab interactor 3	RIN3	0.225015	-0.0978359	-0.322851	no	no	4.1046e-23	85994000	2	2	1	2	2	2	2	2	1	2	2	2	2	2	2.3	107.85	985	1	2	2	2	3	2	1.1	2.3	2.3	2.3	2.3	2.3	6.18033	5.98811	5.73381	6.80804	6.56962	6.43383	7.2545	7.01242	6.88526	7.46139
4092	Q08209;Q08209-2;A8W6Z7;A1A441;E7ETC2;A8W6Z8;E9PK68;E9PPC8	Serine/threonine-protein phosphatase 2B catalytic subunit alpha isoform;Serine/threonine-protein phosphatase	PPP3CA	0.224983	0.0644497	-0.160533	no	no	5.1908e-57	1003100000	10	4	6	7	7	9	6	6	1	3	2	4	2	2	23.2	58.687	521	6	6	4	10	5	5	14.2	16.3	16.1	21.3	14.2	14.2	7.54971	7.36114	7.09653	8.37077	8.12153	8.01094	8.02987	7.85103	7.55819	8.39863
4068	Q05209;E9PBR5;E9PEH9;B4E105;H0YC15;F8WB51;C9J1X8	Tyrosine-protein phosphatase non-receptor type 12	PTPN12	0.224823	0.202207	-0.0226164	no	no	4.5923e-121	2826100000	12	12	8	5	6	7	8	7	8	5	6	7	8	7	24.6	88.105	780	20	20	22	17	19	18	17.1	10.9	13.3	17.6	16.4	15	8.61639	8.44889	8.12156	8.68275	8.47167	8.26813	8.74817	8.59478	8.22175	8.5215
3485	P41240;E7EQW6	Tyrosine-protein kinase CSK	CSK	0.224673	-0.00331438	-0.227988	no	no	5.8327e-70	3560600000	16	16	13	11	10	14	10	9	13	11	10	14	10	9	38.7	50.704	450	20	19	20	23	19	18	31.8	25.3	24.7	34.2	26.7	23.6	8.76696	8.56868	8.33108	8.77832	8.52023	8.42962	8.72784	8.52591	8.2982	8.73283
105	A6NMN0;P46020;P46020-2;A6NIT2;P46020-3	Phosphorylase b kinase regulatory subunit alpha, skeletal muscle isoform	PHKA1	0.223982	-0.919607	-1.14359	no	no	3.7731e-11	284790000	2	2	2	2	2	2	2	2	2	2	2	2	2	2	1.9	139.05	1240	3	3	4	2	2	5	1.9	1.9	1.9	1.9	1.9	1.9	7.46067	7.18184	7.13624	7.55963	7.18823	7.31915	7.84631	7.5097	7.57816	7.61036
6221	Q9HCE0;Q9HCE0-2;B5MEF3;H0YGC2	Ectopic P granules protein 5 homolog	EPG5	0.223835	0.18035	-0.0434844	no	no	2.2882e-35	389810000	7	7	1	2	3	3	3	4	1	2	3	3	3	4	4.5	292.48	2579	1	2	3	5	4	5	0.6	1.2	2.6	1.7	1.6	2.1	6.94485	6.74213	6.51654	7.45215	7.16295	7.139	8.08689	7.87846	7.668	7.87682
4132	Q12789;Q12789-3	General transcription factor 3C polypeptide 1	GTF3C1	0.223411	0.0545121	-0.168899	no	no	1.8218e-116	1426900000	13	13	4	9	7	10	8	7	4	9	7	10	8	7	8.7	238.87	2109	10	15	12	16	16	12	2.9	6.4	4.6	6.3	5.3	4.6	8.07332	7.8727	7.64144	8.33127	8.07925	7.97497	8.3947	8.21357	7.9275	8.6595
1148	P27144;D3DQ64	Adenylate kinase isoenzyme 4, mitochondrial	AK4	0.223101	0.420105	0.197004	no	no	1.1819e-24	671420000	3	3	2	3	1	1	2	3	2	3	1	1	2	3	26	25.268	223	4	4	2	2	2	3	21.1	26	16.1	16.1	21.1	26	8.13545	7.96421	7.64847	8.10161	7.9299	7.61555	8.11414	7.9564	7.5978	8.05408
4586	Q53H82	Beta-lactamase-like protein 2	LACTB2	0.222891	-0.896001	-1.11889	no	no	6.8884e-43	261740000	5	5	3	3	3	3	5	3	3	3	3	3	5	3	28.5	32.805	288	7	7	6	7	8	6	16.7	16.7	16.7	13.5	28.5	16.7	7.48027	7.17687	7.18159	7.68005	7.26963	7.46633	7.61368	7.25696	7.36201	7.59109
4942	Q7Z478;H0Y8L1	ATP-dependent RNA helicase DHX29	DHX29	0.222791	0.238136	0.0153451	no	no	1.351e-178	5638800000	20	20	13	17	12	15	15	16	13	17	12	15	15	16	18.8	155.23	1369	33	42	29	32	38	34	13	16.7	11.7	14.5	13.6	14.5	8.90947	8.7415	8.41564	9.00458	8.762	8.63597	8.92574	8.76802	8.40934	8.85026
5861	Q9BRX8;Q9BRX8-2	Redox-regulatory protein FAM213A	FAM213A	0.222576	0.0332889	-0.189287	no	no	3.188e-128	25797000000	17	17	14	16	15	15	13	16	14	16	15	15	13	16	55	25.764	229	71	70	70	67	66	71	47.6	55	51.5	47.6	47.6	55	9.57044	9.382	9.11701	9.63649	9.3985	9.26171	9.68545	9.47998	9.26171	9.55511
2536	O60287	Nucleolar pre-ribosomal-associated protein 1	URB1	0.222276	0.169582	-0.0526941	no	no	5.1711e-33	634000000	9	9	5	2	5	5	3	4	5	2	5	5	3	4	6.7	254.39	2271	7	3	5	5	5	5	3.5	1.3	3.8	3.9	1.8	2.1	8.16681	7.83964	7.89042	7.7498	7.4928	7.39976	8.10016	7.95521	7.55315	7.81389
4103	Q08AD1;Q08AD1-3;Q08AD1-2	Calmodulin-regulated spectrin-associated protein 2	CAMSAP2	0.221926	-0.0241777	-0.246104	no	no	1.7012e-32	427830000	8	8	6	4	6	3	4	5	6	4	6	3	4	5	6.9	168.09	1489	10	7	8	7	7	6	4.9	3.4	4.9	1.8	3.5	4	7.8663	7.68287	7.4035	7.81434	7.57185	7.44564	7.82721	7.59888	7.43883	7.67939
948	Q9Y6Q9;Q9Y6Q9-5;Q9Y6Q9-3;Q9Y6Q9-2;C9JCR8;Q9Y6Q9-4	Nuclear receptor coactivator 3	NCOA3	0.221799	-0.0588014	-0.2806	no	no	3.0727e-22	201460000	3	3	2	2	2	3	3	2	2	2	2	3	3	2	4.2	155.29	1424	2	2	2	3	3	2	2.6	2.6	2.6	4.2	4.2	2.6	7.46033	7.26771	7.01448	7.10075	6.77018	6.82734	7.59015	7.3831	7.16903	7.68366
5666	Q96KP1;G8JLK9;Q2MDF5	Exocyst complex component 2	EXOC2	0.221728	-0.603976	-0.825704	no	no	3.3589e-47	2128500000	13	13	8	10	8	8	12	10	8	10	8	8	12	10	16.5	104.07	924	14	19	15	13	23	19	12.3	13	9.6	8.7	15.7	12.8	8.39161	8.11254	8.06744	8.5868	8.249	8.31965	8.46801	8.19609	8.13577	8.46764
5854	Q9BRS2	Serine/threonine-protein kinase RIO1	RIOK1	0.221522	0.526972	0.30545	no	no	1.1875e-38	408560000	5	5	3	2	3	2	4	2	3	2	3	2	4	2	14.3	65.582	568	3	2	4	2	4	2	8.5	5.8	8.5	6.5	12.3	6.5	7.81257	7.66908	7.26181	7.57691	7.40489	7.09156	7.83651	7.64643	7.38609	8.00492
4430	Q15678;E2J9M0	Tyrosine-protein phosphatase non-receptor type 14	PTPN14	0.221504	0.143851	-0.0776532	no	no	8.844e-56	756800000	10	10	6	5	5	5	7	6	6	5	5	5	7	6	12.6	135.26	1187	8	7	8	7	10	9	6.8	6.6	5.7	6.7	9.4	8.3	8.05181	7.8859	7.55358	8.08597	7.83732	7.72537	8.03201	7.85465	7.55739	7.9987
6890	Q9Y4K4;G3V4T8;G3V4Q4;G3V3V7	Mitogen-activated protein kinase kinase kinase kinase 5	MAP4K5	0.221343	0.0726042	-0.148739	no	no	4.3323e-74	2161000000	9	9	4	6	6	5	5	6	4	6	6	5	5	6	14.2	95.039	846	8	12	10	10	10	11	8.5	11.8	9.8	10.9	11.3	11.8	8.4747	8.30801	7.97812	8.43772	8.19692	8.06674	8.62822	8.44165	8.17135	8.64308
833	E9PGC5;B7ZMG0;Q5TG12;F5GXI4;Q15262-3;Q15262-2;Q15262;H0Y6P5;H0Y6V4;F5GWP2;H0YDP9	Receptor-type tyrosine-protein phosphatase kappa	PTPRK	0.221294	-0.0969364	-0.31823	no	no	4.6175e-76	1618900000	10	10	6	6	6	5	7	7	6	6	6	5	7	7	10.8	166.03	1472	11	12	9	10	13	11	7	6.7	7.2	5.2	8.1	7.5	8.3937	8.16856	8.00065	8.34274	8.06002	8.02255	8.45254	8.2399	8.0404	8.34244
365	B3KXW5;O43747-2;O43747;E7EUH1;F5GZV5;B4DGE1	AP-1 complex subunit gamma-1	AP1G1	0.221269	-0.013355	-0.234624	no	no	7.2561e-133	6217800000	20	20	16	17	17	12	12	16	16	17	17	12	12	16	26.3	94.139	845	30	40	36	30	35	36	23.2	24.3	24.3	18.2	18.5	23.4	8.90456	8.70471	8.47139	9.10356	8.83821	8.7637	9.07372	8.87222	8.64335	8.85858
4164	Q13017;Q13017-2;Q13017-3;G3V444	Rho GTPase-activating protein 5	ARHGAP5	0.221163	0.0131449	-0.208018	no	no	2.5348e-86	851120000	11	10	9	8	9	6	10	8	8	7	9	5	9	8	11.5	172.46	1502	12	12	15	10	17	14	9.9	8.9	8.3	7.1	11.5	8	8.09792	7.89922	7.66277	8.02325	7.7246	7.71985	8.26637	8.09177	7.78625	8.09996
3827	P61158;B4DXW1;F5H3P5;B4DTI0;Q9P1U1;Q9P1U1-2;Q9P1U1-3;C9IZN3;Q9C0K3;F8WE84;F8WEW2	Actin-related protein 3	ACTR3	0.221038	0.01552	-0.205518	no	no	0	62108000000	24	24	22	21	22	22	21	22	22	21	22	22	21	22	65.6	47.371	418	105	124	99	112	107	103	63.4	61.2	63.4	63.4	61.2	63.4	9.96705	9.77434	9.52137	9.9233	9.66994	9.56869	10.0836	9.90161	9.61795	10.0435
3624	P49841-2;P49841;F5H615	Glycogen synthase kinase-3 beta	GSK3B	0.22103	0.075809	-0.145221	no	no	2.7331e-64	1138100000	11	6	7	7	8	7	7	9	4	4	5	4	5	4	33	48.033	433	4	6	7	5	6	6	22.2	22.2	27.7	22.9	22.9	27.9	8.01515	7.79252	7.61836	8.19992	7.93442	7.86021	8.32558	8.11889	7.90388	8.27147
5709	Q96Q15;Q96Q15-2;Q96Q15-3;Q96Q15-4	Serine/threonine-protein kinase SMG1	SMG1	0.220581	0.0239738	-0.196607	no	no	2.3064e-41	680830000	6	6	5	5	4	6	6	4	5	5	4	6	6	4	2.7	410.5	3661	7	7	5	9	8	4	2.5	2.5	2	2.7	2.7	1.9	7.95022	7.74568	7.52494	7.98832	7.69525	7.67918	8.11508	7.88084	7.73506	8.21521
2128	P49761;P49761-1;G5E959;P49761-3	Dual specificity protein kinase CLK3	CLK3	0.220318	-0.236909	-0.457227	no	no	3.7594e-68	167170000	3	3	2	3	1	2	2	3	2	3	1	2	2	3	11	73.514	638	3	4	1	2	2	3	8.2	11	3.1	6	6	11	7.44736	7.24593	7.01687	7.52649	7.23343	7.21735	7.10988	6.90688	6.682	7.5598
3253	P23786	Carnitine O-palmitoyltransferase 2, mitochondrial	CPT2	0.219723	-0.350837	-0.57056	no	no	1.4049e-21	389460000	5	5	3	3	4	3	3	4	3	3	4	3	3	4	8.1	73.776	658	3	3	4	3	3	3	5.3	5.3	6.4	5.3	5.3	7	7.7084	7.44384	7.36756	7.81311	7.49882	7.52493	7.79821	7.55903	7.42501	7.86358
2726	O94925;B7Z509	Glutaminase kidney isoform, mitochondrial	GLS	0.219647	0.0744259	-0.145221	no	no	0	1083900000	23	3	22	22	22	20	22	22	3	2	2	2	2	2	45.4	73.46	669	8	7	7	4	8	9	43.5	41.6	41.6	38.9	41.6	41.6	8.10735	7.91554	7.66002	8.10473	7.84994	7.75191	8.36609	8.19142	7.88611	7.7812
1375	Q8IWA5-2;E7ETY3;Q8IWA5;Q8IWA5-3	Choline transporter-like protein 2	SLC44A2	0.219498	-0.375623	-0.595122	no	no	1.6212e-38	1360000000	6	6	6	5	4	4	6	4	6	5	4	4	6	4	11.3	80.736	711	6	7	4	8	8	5	11.3	10	6.3	6.8	11.3	6.8	8.37743	8.16679	7.96213	8.42924	8.14523	8.11049	8.25592	8.01953	7.87894	8.25249
1339	E7ER94;Q9BZL6;Q9NRP7;A8MU99;Q9NRP7-2;O76039;Q00532-2;Q92772;Q00532;C9JDA4	Serine/threonine-protein kinase D2	PRKD2	0.21862	0.10372	-0.1149	no	no	6.1677e-67	844900000	12	9	8	6	6	7	9	7	5	4	4	4	7	4	23	97.77	888	7	5	5	5	9	5	16.9	16.1	12.5	17	20.3	14.9	8.18512	7.97529	7.7685	7.7585	7.48637	7.42649	8.1949	7.97498	7.79403	8.01986
3860	P62136;Q07161;E9PDP1;A6NNR3;E9PMD7;F5H037;F5H1L6;H0Y3Y6;F8WE71	Serine/threonine-protein phosphatase PP1-alpha catalytic subunit;Serine/threonine-protein phosphatase	PPP1CA	0.218108	0.0420409	-0.176067	no	no	4.6788e-274	4939600000	23	6	18	18	19	17	18	20	3	4	4	4	4	5	71.8	37.512	330	11	13	15	14	13	14	48.2	54.2	55.2	52.1	53.3	67.6	8.76385	8.5524	8.3498	9.0235	8.77559	8.66193	8.75558	8.55577	8.32232	8.86757
5011	Q86V21;Q86V21-2;Q86V21-3;F5GWW7;F5GYN1;F8W8B5;E7EW25;F5GYW2;F5H790;F5H8J5;F6UZ17;F5H3E3;F5H4V2;F5H6X9	Acetoacetyl-CoA synthetase	AACS	0.218013	-0.709732	-0.927745	no	no	4.5526e-60	1595200000	11	11	7	8	8	6	6	6	7	8	8	6	6	6	20.4	75.143	672	16	18	17	15	12	13	14	12.8	15.5	9.7	9.2	12.1	8.43222	8.15452	8.1065	8.48304	8.11321	8.2414	8.54372	8.25035	8.2349	8.3362
6685	Q9ULE6	Paladin	PALD	0.217862	-1.38692	-1.60478	no	no	3.708e-100	930540000	11	11	5	9	5	6	5	6	5	9	5	6	5	6	18.8	96.753	856	7	11	9	8	10	8	9.1	15.5	9.2	11.1	9	11.1	8.11501	7.72435	7.88824	8.31099	7.8531	8.12496	8.22732	7.88182	7.96662	8.1086
4532	Q8N9R8-2;Q8N9R8;Q3SXZ0	Protein SCAI	SCAI;C9orf126	0.217527	-0.41846	-0.635987	no	no	3.0927e-07	121630000	1	1	1	1	1	1	1	1	1	1	1	1	1	1	1.9	72.933	629	2	4	3	2	3	3	1.9	1.9	1.9	1.9	1.9	1.9	7.16658	6.88078	6.84974	7.2489	6.92559	6.96906	7.44618	7.23391	7.03346	7.21392
947	P15408;P15408-3;C9JCN8	Fos-related antigen 2	FOSL2	0.217159	0.755965	0.538807	no	no	7.0302e-23	286110000	2	2	2	2	2	2	2	2	2	2	2	2	2	2	5.2	35.193	326	6	6	6	6	5	6	5.2	5.2	5.2	5.2	5.2	5.2	7.74345	7.60376	7.18284	7.32826	7.16726	6.8193	7.78024	7.62464	7.25897	7.71958
2560	O60524;O60524-3;O60524-5;O60524-4;G3V5V3;F5H639;G3V4D9;O60524-2;G3V547	Nuclear export mediator factor NEMF	NEMF	0.216821	0.00481212	-0.212009	no	no	9.0957e-114	3290300000	14	14	10	10	7	9	9	7	10	10	7	9	9	7	19.2	122.95	1076	31	32	27	29	32	27	11.9	11.9	8.5	13	10.8	6.9	8.78028	8.58316	8.34238	8.70081	8.43383	8.36284	8.78357	8.61932	8.28176	8.64418
1284	Q8IVB5;E7EPC2	LIX1-like protein	LIX1L	0.216755	-0.0263043	-0.24306	no	no	3.5244e-05	226600000	2	2	1	1	1	1	2	1	1	1	1	1	2	1	6.5	36.562	337	2	3	3	2	4	4	2.4	2.4	2.4	2.4	6.5	2.4	7.05434	6.85408	6.62182	7.09475	6.82625	6.75853	7.53915	7.28112	7.19039	7.27203
6217	Q9HC36	RNA methyltransferase-like protein 1	RNMTL1	0.216713	0.10035	-0.116363	no	no	1.5037e-13	337950000	3	3	3	2	1	1	2	2	3	2	1	1	2	2	16.2	47.019	420	3	2	1	1	2	2	16.2	6.9	2.9	2.9	6.9	6.9	8.01653	7.84986	7.51993	7.75801	7.52825	7.37168	7.34867	7.05675	7.03834	7.44685
380	Q13325;B4DDV1	Interferon-induced protein with tetratricopeptide repeats 5	IFIT5	0.21666	0.387412	0.170751	no	no	1.8102e-28	321030000	4	4	3	2	4	3	3	3	3	2	4	3	3	3	13.5	55.846	482	3	3	5	3	4	4	9.5	6.8	13.5	10.6	8.5	8.5	7.4951	7.32919	6.99687	7.4831	7.26762	7.07544	8.01507	7.80955	7.59143	7.76583
3057	P12814;Q1HE25;P12814-2;B7TY16;G3V2N5;H0YJW3;B2RCS5;P35609;G3V2W4;H0YJ11;Q08043;H0YGN3;G3V2X9;G3V5M4;G3V2E8;G3V380;B7Z4P8;D6RH00	Alpha-actinin-1	ACTN1	0.216659	0.160492	-0.0561673	no	no	0	172160000000	65	43	62	63	62	62	62	61	41	42	41	42	41	41	73.7	103.06	892	276	297	272	275	256	270	72.5	71.3	70.2	69.3	71.3	70.2	10.4102	10.2383	9.92444	10.4819	10.2595	10.0848	10.5002	10.3209	10.0295	10.4054
3448	P37173-2;P37173;F8WCK9;E9PDS4	TGF-beta receptor type-2	TGFBR2	0.215842	-0.384713	-0.600555	no	no	1.8843e-63	953640000	9	9	4	5	6	4	3	6	4	5	6	4	3	6	18.4	67.456	592	9	10	14	12	7	11	7.4	9	12.8	7.4	5.9	12	8.14176	7.92809	7.73129	8.07737	7.81224	7.73718	8.44813	8.21487	8.06681	8.0958
3131	P16615;P16615-3;P16615-2;P16615-5;P16615-4;O14983;O14983-2;Q8N3X5;B3KY17;F8VSH0	Sarcoplasmic/endoplasmic reticulum calcium ATPase 2	ATP2A2	0.21581	0.166179	-0.0496307	no	no	0	19996000000	36	28	33	31	33	32	31	31	26	25	26	25	24	24	38	114.76	1042	71	75	68	64	74	67	34.3	32.6	33.7	34.5	34.4	32.8	9.55139	9.30207	9.19165	9.52839	9.30434	9.13373	9.54274	9.36556	9.06778	9.35301
3051	P12235	ADP/ATP translocase 1	SLC25A4	0.215791	-0.294665	-0.510455	no	no	3.6133e-140	480430000	18	3	13	16	15	15	15	15	1	2	2	2	3	2	58.7	33.064	298	2	7	4	3	6	6	40.3	46.3	46	45.6	53	46	7.51376	7.27566	7.13912	8.11314	7.80041	7.82351	7.69777	7.45688	7.32691	7.73991
4630	Q5JWT2;Q9ULK4;Q9ULK4-3;Q9ULK4-5;Q9ULK4-4;F5H4T7;F5H685;Q9ULK4-2;B9TX55;F5H0J5;B9TX57	Mediator of RNA polymerase II transcription subunit 23	CRSP3;MED23	0.21554	0.0717548	-0.143785	no	no	5.6288e-57	839280000	9	9	6	8	5	6	8	7	6	8	5	6	8	7	9	157.11	1374	11	13	8	9	12	11	6.6	8	4.9	6.6	8.2	6.6	7.98071	7.75645	7.58636	8.10089	7.8291	7.76849	8.02053	7.87108	7.48467	8.05465
4884	Q6ZSR9	Uncharacterized protein FLJ45252		0.215414	0.0847468	-0.130667	no	no	2.6614e-41	754610000	4	4	4	4	4	4	4	3	4	4	4	4	4	3	18	37.976	355	10	6	7	9	8	8	18	18	18	18	18	13.5	8.22248	7.95367	7.88667	8.02272	7.76933	7.66822	8.10212	7.83357	7.76597	8.06796
2930	P07099;B1AQP9;B1AQP8	Epoxide hydrolase 1	EPHX1	0.215162	-0.708938	-0.9241	no	no	3.7522e-178	18870000000	22	22	19	18	17	20	19	18	19	18	17	20	19	18	52.5	52.948	455	51	56	56	56	50	55	47	46.8	46.8	52.3	52.3	45.9	9.30172	9.02934	8.97004	9.49392	9.13735	9.24212	9.6073	9.34136	9.26809	9.40345
4742	Q5VYS8;Q5VYS8-6;Q5VYS8-4;Q5VYS8-3;Q5VYS8-5	Terminal uridylyltransferase 7	ZCCHC6	0.214923	-0.0490732	-0.263996	no	no	1.4347e-60	323790000	4	3	3	3	3	3	3	4	2	2	2	2	2	3	3.4	171.23	1495	5	3	4	5	4	6	3.3	3.3	3.3	3.3	3.3	3.4	7.74768	7.54517	7.31902	7.32787	7.04614	7.00664	7.78698	7.59923	7.33228	7.77021
2393	O15013;O15013-6;O15013-5;O15013-4;O15013-7;H0YAN8;C9JE94;E9PB39	Rho guanine nucleotide exchange factor 10	ARHGEF10	0.214672	0.31937	0.104697	no	no	1.0471e-75	2405700000	12	12	9	10	8	6	9	7	9	10	8	6	9	7	11.6	151.61	1369	18	23	18	15	19	18	8.9	9.6	8.8	6.6	9.4	7.2	8.61079	8.45895	8.08063	8.54787	8.32247	8.15524	8.66541	8.48545	8.19593	8.51029
3585	P49137;P49137-2	MAP kinase-activated protein kinase 2	MAPKAPK2	0.21455	-0.166844	-0.381394	no	no	4.7316e-109	1128600000	9	8	8	8	7	7	8	8	7	7	6	6	7	8	31.5	45.567	400	11	12	9	11	14	12	27.2	27.2	22.5	24.2	27.2	29.5	8.19642	7.96127	7.81773	8.30064	8.00488	7.99428	8.29301	8.063	7.90701	8.25327
2105	Q9GZR7;G3V529;F5H4J5;Q4V9L5;E7ETZ2;F5GYL3;F5H4V3	ATP-dependent RNA helicase DDX24	DDX24	0.214363	0.11352	-0.100843	no	no	1.1654e-140	2801100000	10	10	9	10	10	10	10	7	9	10	10	10	10	7	13.2	96.331	859	15	18	19	22	17	13	12	13.2	13.2	13.2	13.2	10.2	8.62734	8.44905	8.15458	8.60588	8.36732	8.23185	8.74926	8.58874	8.23922	8.73864
1036	C9JV30;P20839-3;E7EQS0;P20839;C9J381;B4DE09;P20839-2;C9K0R9;C9J029	Inosine-5-monophosphate dehydrogenase;Inosine-5-monophosphate dehydrogenase 1	IMPDH1	0.214188	0.49076	0.276572	no	no	7.4142e-132	4955000000	15	14	11	12	8	11	14	12	11	11	8	11	14	12	32.3	60.897	566	28	27	23	29	33	33	23.7	26.9	20.5	27.6	31.1	27.2	8.79559	8.65346	8.24135	8.89019	8.69177	8.45457	8.81958	8.66991	8.28425	8.83016
4216	Q13423;E9PCX7;D6RAI5;D6RHU2;B4DMN9;F5H8A9;D6RCR6;H0Y8P5	NAD(P) transhydrogenase, mitochondrial	NNT	0.213952	-0.692784	-0.906737	no	no	9.7779e-215	13174000000	29	29	20	21	20	25	25	21	20	21	20	25	25	21	30.1	113.89	1086	41	42	44	46	44	36	22.7	23.1	24.7	25.7	28	22.3	9.26394	8.97953	8.94566	9.33596	8.97216	9.08976	9.37576	9.11334	9.03234	9.27284
753	Q9NV88;B7Z560;G3XAN1;H0YG17;E5RG70;H0YBH8;E5RK47;E5RJ88	Integrator complex subunit 9	INTS9	0.213333	0.121126	-0.0922074	no	no	1.4631e-26	363460000	6	6	3	3	3	2	4	4	3	3	3	2	4	4	12.9	73.814	658	3	5	4	3	4	6	8.2	5.2	6.5	3.8	8.1	8.1	7.77871	7.58959	7.32652	7.56525	7.31211	7.21035	7.73652	7.55033	7.27894	7.34023
1835	Q99996-6;Q99996;Q99996-2;Q99996-3;F5H3X5;Q99996-5;F8WCY9;Q99996-4;Q6PJH3;E7EQ96;H0Y6Q0	A-kinase anchor protein 9	AKAP9	0.213058	0.0350766	-0.177981	no	no	2.0619e-112	1235300000	22	22	8	11	11	11	15	18	8	11	11	11	15	18	7.6	455.42	3929	17	28	28	31	28	35	2.5	3.4	4.2	3.2	5	6.6	8.08757	7.86331	7.69324	8.27701	7.9987	7.95202	8.41647	8.18509	8.0325	8.25261
6964	Q9Y6N5	Sulfide:quinone oxidoreductase, mitochondrial	SQRDL	0.212979	1.06966	0.856685	no	no	2.0239e-281	6055500000	21	21	15	16	14	13	12	12	15	16	14	13	12	12	54.9	49.96	450	37	28	33	28	24	25	46	47.6	37.3	42.2	38.4	34.4	9.04759	8.90827	8.48599	8.9747	8.82001	8.45133	9.03165	8.88313	8.49351	8.90987
1408	Q86U86;Q86U86-8;Q86U86-2;Q86U86-3;Q86U86-7;Q86U86-5;E7EVG2;Q86U86-9;Q86U86-4;H0Y5B5;Q86U86-6;C9JPI5;C9JQF1;C9J053;C9JCJ2	Protein polybromo-1	PBRM1	0.212761	-0.0820213	-0.294782	no	no	6.2419e-179	3287800000	20	20	14	15	15	17	17	16	14	15	15	17	17	16	15.7	192.95	1689	38	42	38	40	45	43	11	11.1	11.7	14.7	12.6	12.1	8.66662	8.41402	8.31108	8.56386	8.27731	8.24785	8.69419	8.50901	8.23469	8.76005
5723	Q96RF0;Q96RF0-2	Sorting nexin-18	SNX18	0.212625	-0.330673	-0.543298	no	no	2.7999e-12	824180000	3	3	2	3	2	3	3	2	2	3	2	3	3	2	4.8	68.894	628	3	6	2	6	5	4	3.2	4.8	3.2	4.8	4.8	3.2	8.15351	7.89426	7.80629	8.23739	7.94192	7.93072	7.81352	7.61422	7.3794	8.19148
4499	Q27J81;Q27J81-2;Q27J81-3;C9JAR5	Inverted formin-2	INF2	0.212331	-0.200504	-0.412836	no	no	1.2085e-290	5842300000	18	18	12	13	12	11	14	12	12	13	12	11	14	12	22.8	135.62	1249	27	29	26	30	29	26	17.2	17.9	16.1	15.6	18.7	15.9	8.8951	8.70643	8.4421	8.98451	8.7228	8.64024	9.05262	8.89337	8.53975	9.02255
3621	P49790;F6QR24;Q4LE47	Nuclear pore complex protein Nup153	NUP153;NUP153 variant protein	0.212117	-0.0824301	-0.294547	no	no	3.4118e-178	3059300000	29	29	17	12	17	12	15	20	17	12	17	12	15	20	30	153.94	1475	22	22	24	15	22	25	19.9	12.9	18.9	12.5	16.3	21.1	8.62557	8.42137	8.19973	8.59939	8.31652	8.27942	8.81718	8.61171	8.39345	8.48909
5243	Q8NCW5;Q8NCW5-2;Q5T3I4;Q5T3I3	NAD(P)H-hydrate epimerase	APOA1BP	0.211907	-0.166715	-0.378623	no	no	8.6346e-69	5810300000	8	8	4	5	5	5	6	6	4	5	5	5	6	6	36.8	31.674	288	14	16	17	13	17	18	25	28.8	28.8	27.8	31.6	31.2	8.72054	8.51013	8.30486	8.73007	8.46409	8.39092	8.88989	8.66889	8.49067	8.72954
2761	O95336	6-phosphogluconolactonase	PGLS	0.21186	-0.260628	-0.472488	no	no	3.0732e-90	11753000000	11	11	11	11	11	10	11	11	11	11	11	10	11	11	55.4	27.547	258	30	31	28	30	32	28	55.4	55.4	55.4	49.6	55.4	55.4	9.30183	9.07129	8.91662	9.29973	9.02263	8.97337	9.22407	9.00454	8.82263	9.24257
5781	Q99575;E5RK39	Ribonucleases P/MRP protein subunit POP1	POP1	0.211687	0.278689	0.0670015	no	no	1.8072e-80	2097600000	12	12	8	11	10	10	10	9	8	11	10	10	10	9	17.3	114.71	1024	19	22	19	19	19	17	11.4	15.8	13.9	14.6	13.6	11.8	8.35447	8.19293	7.84673	8.59684	8.38753	8.17938	8.53142	8.37502	8.01199	8.58009
1450	E9PB12;Q96RT8;H0YMZ9	Gamma-tubulin complex component 5	TUBGCP5	0.211675	0.0150681	-0.196607	no	no	2.1204e-11	506980000	4	4	2	2	2	2	3	3	2	2	2	2	3	3	6.6	118.64	1024	5	5	4	5	6	6	1.9	3.2	1.9	1.9	4.2	4.2	7.86366	7.66979	7.42004	7.91994	7.66578	7.56637	7.78148	7.58846	7.33634	8.06952
1039	Q9ULC8-3;Q9ULC8;Q9ULC8-2;C9JVM2	Probable palmitoyltransferase ZDHHC8	ZDHHC8	0.211312	-0.0330883	-0.2444	no	no	1.4089e-15	174150000	1	1	1	1	1	1	1	1	1	1	1	1	1	1	2.2	83.172	778	2	2	2	2	2	2	2.2	2.2	2.2	2.2	2.2	2.2	7.3478	7.16411	6.88547	7.23734	6.96667	6.90365	7.67581	7.49499	7.20801	7.74579
271	B1AKJ6;Q96SU4;Q96SU4-2;Q86YQ3;E9PJW9;B3KPQ4;Q96SU4-3;Q96SU4-4;Q96SU4-5;H0YE19;E9PK98	Oxysterol-binding protein;Oxysterol-binding protein-related protein 9	OSBPL9	0.210778	-0.00446547	-0.215244	no	no	1.0049e-83	2301000000	9	9	7	9	6	7	6	7	7	9	6	7	6	7	20.1	83.785	741	14	15	10	14	14	12	11.6	20.1	13.6	15.1	9.6	11.6	8.51622	8.33492	8.04933	8.52533	8.2668	8.17719	8.62615	8.44265	8.16343	8.67969
4825	Q6P2Q9;F5H2I4	Pre-mRNA-processing-splicing factor 8	PRPF8	0.210668	0.00702864	-0.20364	no	no	0	48280000000	83	83	66	70	63	65	67	71	66	70	63	65	67	71	41.9	273.6	2335	163	187	169	177	181	177	34.8	34.8	30.4	31.6	32.5	35.7	9.80733	9.61783	9.35585	9.92541	9.64584	9.6018	9.929	9.72453	9.50361	9.91959
1886	O43143;F5H6K0	Putative pre-mRNA-splicing factor ATP-dependent RNA helicase DHX15	DHX15	0.210621	-0.0354831	-0.246104	no	no	1.9614e-252	32453000000	37	36	32	31	32	31	34	30	31	30	31	30	33	29	54.5	90.932	795	111	121	104	136	116	95	47	45.4	50.4	46.2	51.7	45.7	9.67631	9.4829	9.23188	9.68632	9.4264	9.33989	9.7817	9.59415	9.32662	9.69358
5051	Q86YV5	Tyrosine-protein kinase SgK223	SGK223	0.210293	-0.521151	-0.731444	no	no	1.204e-46	421060000	4	4	1	2	1	4	2	3	1	2	1	4	2	3	5.3	149.31	1402	2	3	2	4	3	3	0.9	2.2	0.9	5.3	2.2	4.4	7.67197	7.38815	7.35301	7.8962	7.53078	7.65124	7.60955	7.32799	7.28812	8.01678
773	Q13829;B7Z6M4	BTB/POZ domain-containing adapter for CUL3-mediated RhoA degradation protein 2	TNFAIP1	0.209933	0.24643	0.0364963	no	no	3.1096e-11	384840000	3	2	3	2	2	2	2	2	2	2	2	2	2	2	8.5	36.204	316	4	3	5	4	5	5	8.5	6.3	6.3	6.3	6.3	6.3	7.86436	7.71229	7.33482	7.8606	7.60661	7.5068	7.86578	7.69748	7.37265	7.84488
3565	P48147	Prolyl endopeptidase	PREP	0.209931	-0.15004	-0.359971	no	no	0	17711000000	27	27	24	24	24	24	24	26	24	24	24	24	24	26	46.1	80.699	710	75	81	73	74	83	73	41	42.5	43.4	43.4	44.9	43.7	9.42085	9.21336	9.00043	9.43522	9.15528	9.11203	9.50239	9.29294	9.08511	9.42685
1	A0AVT1;A0AVT1-2;H0Y8S8;A0AVT1-3;A0AVT1-4	Ubiquitin-like modifier-activating enzyme 6	UBA6	0.209518	-0.0391385	-0.248656	no	no	2.2171e-199	9303800000	30	30	20	22	24	22	23	25	20	22	24	22	23	25	37.1	117.97	1052	36	46	51	38	45	48	27.4	29.9	32.1	29.6	29.8	33	9.04879	8.84617	8.62026	9.17011	8.88267	8.85507	9.2403	9.0423	8.80397	9.02759
5986	Q9BYV8;Q9BYV8-2;Q9BYV8-5;C9JXA0;C9JCX6;C9J9X8;C9J6R3;Q9BYV8-3;F8WF85;C9IZ34	Centrosomal protein of 41 kDa	CEP41	0.209198	-0.44074	-0.649937	no	no	3.1207e-73	1679700000	6	6	5	4	5	5	6	5	5	4	5	5	6	5	15.8	41.368	373	18	18	18	19	21	19	13.1	11	13.7	13.1	15.8	13.1	8.39183	8.13985	8.03551	8.26179	7.93317	7.9867	8.61664	8.36461	8.26041	8.45536
5182	Q8N556;E9PDT7	Actin filament-associated protein 1	AFAP1	0.209107	0.0581576	-0.150949	no	no	1.8268e-45	1471000000	10	10	6	7	6	6	7	6	6	7	6	6	7	6	18.1	80.724	730	8	11	8	10	11	9	9.9	9.7	13.7	9.7	11	9.7	8.26449	8.04949	7.85606	8.44769	8.19005	8.09844	8.41367	8.19997	8.0032	8.31601
742	F8VWL3;E9PJX4;B7Z493;Q96M96;F8W1R0;G3XA97;Q96M96-2;E9PNX0;E9PQT1;Q96M96-3	FYVE, RhoGEF and PH domain-containing protein 4	FGD4	0.20883	0.2002	-0.0086304	no	no	6.6626e-42	2778800000	6	6	4	5	4	5	5	4	4	5	4	5	5	4	8	101	903	8	8	6	5	9	10	5.5	6.1	5.5	6.5	6.5	5.5	8.56602	8.3598	8.14355	8.773	8.46715	8.47673	8.40856	8.19243	8.00191	8.73373
2527	O43933;E9PE75;Q96S70	Peroxisome biogenesis factor 1	PEX1;PEX1R633Ter	0.208816	-0.304978	-0.513794	no	no	2.6457e-23	239590000	5	5	2	3	2	2	4	3	2	3	2	2	4	3	6.2	142.87	1283	2	3	2	2	4	3	3.4	4.7	2.9	2.7	5.3	4.4	7.00052	6.72634	6.67091	7.37742	7.14067	7.00091	7.57394	7.35898	7.16545	7.27467
5877	Q9BT67;Q9BT67-2	NEDD4 family-interacting protein 1	NDFIP1	0.208525	-1.08549	-1.29402	no	no	2.3826e-34	427420000	4	4	1	3	3	4	3	3	1	3	3	4	3	3	20.4	24.899	221	2	5	3	3	4	4	7.7	15.4	15.4	20.4	15.4	15.4	7.28215	6.89831	7.05061	7.75223	7.409	7.48965	7.95086	7.64023	7.65922	8.09621
5094	Q8IWV7;F5GYN5;Q8IWV7-2	E3 ubiquitin-protein ligase UBR1	UBR1	0.208373	0.0894823	-0.118891	no	no	4.4743e-166	3899700000	16	16	11	10	10	11	11	13	11	10	10	11	11	13	14.4	200.21	1749	29	29	31	28	34	36	10.9	10.2	9.2	10.6	10.3	12.2	8.87487	8.68605	8.42215	8.61494	8.34177	8.28414	8.73853	8.53283	8.31517	8.66269
1969	Q8IVF7;F8W1F5;Q8IVF7-3;Q8IVF7-2;C9IZY8	Formin-like protein 3	FMNL3	0.208225	-0.770702	-0.978928	no	no	1.0266e-98	2291700000	15	12	9	13	11	10	12	13	6	10	8	7	9	11	16.9	117.21	1028	16	18	20	14	22	20	10	15.4	12.4	11	13.5	14.9	8.36352	8.05235	8.07236	8.53589	8.15299	8.30371	8.60425	8.33746	8.26604	8.42817
4477	Q16658;B3KTM9;C9JFC0;C9JPH9	Fascin	FSCN1	0.208024	0.000880282	-0.207143	no	no	1.8532e-263	67252000000	30	30	28	26	28	28	27	25	28	26	28	28	27	25	71.6	54.529	493	126	125	107	125	116	104	67.5	60.4	64.3	67.5	64.1	60.2	10.025	9.83896	9.56717	10.0726	9.82246	9.71389	9.97772	9.78194	9.53749	10.0713
5771	Q99496;B3KRH1	E3 ubiquitin-protein ligase RING2	RNF2	0.207572	0.342049	0.134477	no	no	1.3275e-35	186320000	8	6	6	6	4	3	5	5	4	4	2	1	3	3	36	37.655	336	4	6	4	2	4	5	29.5	30.7	17	13.1	26.8	20.2	7.25583	7.05026	6.83223	7.46181	7.2464	7.05404	7.27124	7.0479	6.87553	6.95298
5250	Q8NDT2;Q0VA89;F5GZJ8	Putative RNA-binding protein 15B	RBM15B	0.207569	-0.00891703	-0.216486	no	no	1.0689e-83	739600000	8	7	5	3	4	5	5	4	5	3	3	5	5	4	16.7	97.204	890	5	3	3	5	6	5	11.8	8.1	6.3	9.2	10.2	8.1	8.12681	7.91741	7.70954	7.72652	7.4814	7.36131	7.90311	7.72048	7.43876	8.17409
6795	Q9Y2H6;Q9Y2H6-2;G5E9X3	Fibronectin type-III domain-containing protein 3A	FNDC3A	0.207387	-0.067501	-0.274888	no	no	5.4338e-141	3020900000	12	12	8	6	8	9	9	7	8	6	8	9	9	7	17.8	131.85	1198	21	16	20	18	20	17	13.6	9.3	12.3	14.5	13.1	9.5	8.69721	8.49073	8.27515	8.50556	8.24346	8.16176	8.81439	8.5958	8.41152	8.71927
520	O60291-2;O60291-3;O60291;E9PB19;O60291-4;B4DR12	E3 ubiquitin-protein ligase MGRN1	MGRN1	0.207306	0.281474	0.0741676	no	no	2.4275e-34	236480000	4	4	3	3	3	2	2	3	3	3	3	2	2	3	10.6	63.189	576	13	10	9	9	9	9	7.8	7.8	8	5.2	5.2	7.8	7.71198	7.52542	7.25506	7.41308	7.1782	7.03403	7.81809	7.62151	7.37927	7.42928
2430	O15269;Q96IX6	Serine palmitoyltransferase 1	SPTLC1	0.207089	-0.0143553	-0.221444	no	no	7.2731e-90	7397700000	15	15	11	10	10	13	13	12	11	10	10	13	13	12	38.1	52.743	473	25	28	27	26	32	32	29.4	29.6	30.2	34.5	33	33	9.02792	8.81371	8.61829	9.03775	8.79768	8.66582	8.97513	8.78054	8.53281	9.11344
5400	Q8WWP7	GTPase IMAP family member 1	GIMAP1	0.206843	0.291574	0.0847315	no	no	3.9858e-57	3220400000	8	8	7	6	4	7	6	4	7	6	4	7	6	4	39.5	34.369	306	18	17	16	20	19	17	33.7	27.5	17	33.3	27.5	17	8.60371	8.43082	8.12015	8.57372	8.35315	8.17383	8.74756	8.57181	8.26975	8.7435
4724	Q5VTL8;Q5VTL8-2	Pre-mRNA-splicing factor 38B	PRPF38B	0.206817	0.141796	-0.0650208	no	no	2.8966e-16	1081100000	3	3	2	2	1	2	2	3	2	2	1	2	2	3	6	64.467	546	5	8	5	7	6	7	3.8	3.8	2.2	3.8	3.8	6	8.11183	7.92178	7.6614	8.21801	7.96053	7.86858	8.16988	7.98408	7.71158	8.31057
4503	Q2M2I8;Q2M2I8-2;E9PG46	AP2-associated protein kinase 1	AAK1	0.206362	0.0422191	-0.164143	no	no	2.6997e-127	4204600000	16	14	11	12	10	12	11	10	10	10	9	11	10	9	24.6	103.88	961	16	18	16	17	16	14	17.1	18	16.9	20.4	19.1	17.2	8.79932	8.6174	8.33363	8.91387	8.54319	8.67285	8.84227	8.64301	8.40807	8.86678
1923	Q9NSE4;F6SBX2	Isoleucine--tRNA ligase, mitochondrial	IARS2	0.206306	-0.483261	-0.689567	no	no	9.7675e-112	9911200000	23	23	16	20	19	18	16	18	16	20	19	18	16	18	28.2	113.79	1012	56	68	58	55	55	64	22	22.5	24.9	24.6	19.9	20.7	9.13014	8.88937	8.75912	9.2966	8.96023	9.02825	9.15452	8.88148	8.82358	9.13956
467	Q8IZ83;B4DLQ1;F5H4B6;F8WBH3;Q8IZ83-2	Aldehyde dehydrogenase family 16 member A1	ALDH16A1	0.206279	-0.363115	-0.569394	no	no	1.7541e-68	2850700000	8	8	6	6	6	8	7	6	6	6	6	8	7	6	15.1	85.126	802	15	13	11	19	18	16	11.5	11.5	11.8	15.1	13.1	11.8	8.63017	8.37863	8.27328	8.69471	8.37208	8.41425	8.56208	8.33167	8.1767	8.61109
3978	P84022;B7Z4Z5;B7Z9Q2;F5H383;H0YKE2;H0YNV1	Mothers against decapentaplegic homolog 3	SMAD3	0.206186	0.0646228	-0.141564	no	no	2.0128e-37	263240000	8	3	8	7	5	7	7	8	3	2	2	3	2	3	22.6	48.08	425	3	1	2	3	2	4	22.6	16.7	15.3	20	20.5	22.6	7.7172	7.55508	7.21067	7.05767	6.82035	6.68191	7.60211	7.4009	7.17126	7.67499
63	A6NDY9;F8WE98		FLNA	0.20617	0.112069	-0.0941009	no	no	0	3807300000	117	2	109	113	112	106	106	109	2	2	2	2	2	2	66	245.86	2315	18	14	18	17	20	16	64.6	65.1	65.2	61.5	62.9	62.5	8.74497	8.56299	8.27939	8.76518	8.52295	8.39609	8.84993	8.65422	8.40958	8.7406
1899	O14802;F5H7E9;Q7Z755	DNA-directed RNA polymerase III subunit RPC1;DNA-directed RNA polymerase	POLR3A	0.205958	-0.127237	-0.333195	no	no	9.703e-56	412030000	6	6	1	2	2	3	2	4	1	2	2	3	2	4	6.6	155.64	1390	2	4	4	5	3	5	1	2.5	2.5	4.6	2.2	4.9	7.62605	7.39026	7.24824	7.83651	7.54832	7.52225	7.90912	7.72256	7.45223	7.7134
6968	Q9Y6W5;Q9Y6W5-2	Wiskott-Aldrich syndrome protein family member 2	WASF2	0.205896	-0.238665	-0.444561	no	no	1.021e-21	908760000	4	4	4	4	3	4	3	4	4	4	3	4	3	4	9.8	54.283	498	7	10	7	12	4	8	9.8	9.8	8	9.8	8	9.8	8.07947	7.855	7.68546	8.27869	8.01982	7.93092	8.13402	7.8783	7.7824	8.18741
2472	O43293;O43293-2;E9PBT2;E9JGM7;Q9UIK4-2;Q9UIK4	Death-associated protein kinase 3	DAPK3	0.205801	0.21225	0.00644884	no	no	4.2491e-117	4621000000	13	13	10	10	10	11	11	9	10	10	10	11	11	9	33.3	52.535	454	22	18	20	20	21	18	27.5	25.1	28	29.1	29.1	21.1	8.85611	8.65657	8.42241	8.80542	8.58432	8.40635	8.89114	8.7235	8.39658	9.0408
6621	Q9UIG0;Q9UIG0-2	Tyrosine-protein kinase BAZ1B	BAZ1B	0.205758	0.0943256	-0.111432	no	no	5.2861e-167	3853100000	20	20	16	17	11	16	19	14	16	17	11	16	19	14	16.5	170.9	1483	40	44	36	43	51	37	12.1	15.2	9.4	12.7	16.5	11.1	8.71928	8.54227	8.244	8.80409	8.58243	8.40586	8.71024	8.56577	8.16203	8.83023
5102	Q8IXB1;F8W884;Q8IXB1-2;Q3B7W8;E7EP04;Q71S60	DnaJ homolog subfamily C member 10	DNAJC10	0.205131	0.0280426	-0.177089	no	no	2.1045e-107	3706100000	14	14	12	10	11	10	11	12	12	10	11	10	11	12	17.4	91.079	793	36	35	36	37	33	38	13.6	12.2	12.1	11.5	13	14.2	8.82644	8.55514	8.49349	8.73784	8.50899	8.35021	8.81175	8.58123	8.42648	8.84274
4461	Q16513;Q16513-2;Q16513-3;Q16513-4;Q16513-5;B1AL79;F5H3S7;H0Y429;Q6P5Z2;H0Y5V5	Serine/threonine-protein kinase N2	PKN2	0.205027	-0.376179	-0.581207	no	no	9.7231e-142	2837900000	18	16	11	13	14	13	14	15	10	12	12	11	12	14	22.2	112.03	984	22	29	23	28	29	28	14	15	16.3	17.6	15.9	19	8.5159	8.27321	8.14746	8.60213	8.24499	8.35077	8.75429	8.50625	8.39291	8.67933
3750	P54760;Q96L35;P54753;P54756;P54756-2;P54756-3;F8W9W0	Ephrin type-B receptor 4	EPHB4	0.205026	0.0860019	-0.119024	no	no	2.8315e-79	1164500000	16	14	9	8	6	10	10	10	8	7	6	8	9	9	18.7	108.27	987	8	10	8	8	10	12	12.3	10.4	9.3	13.5	12.5	12.5	8.13049	7.93982	7.68111	8.24974	7.97848	7.91675	8.32677	8.16128	7.82761	8.31511
776	Q7Z3V4;F5H2J2;B7Z6V9	Ubiquitin-protein ligase E3B	UBE3B	0.204935	-0.178451	-0.383386	no	no	4.2552e-06	153660000	1	1	1	1	0	1	1	1	1	1	0	1	1	1	1.5	123.1	1068	4	4	0	3	4	4	1.5	1.5	0	1.5	1.5	1.5	7.49463	7.29422	7.06239	7.38716	7.06904	7.10254	NaN	NaN	NaN	7.12597
6887	Q9Y4K0;E5RFY0;E5RHH3;H0YAR1;E5RJL2;E5RI22;H0YAP6	Lysyl oxidase homolog 2	LOXL2	0.204596	0.718901	0.514305	no	no	1.0653e-239	8712100000	19	19	15	16	17	18	15	16	15	16	17	18	15	16	36.7	86.724	774	41	39	42	43	45	37	27.1	29.2	33.5	32.4	29.3	28.3	9.13773	8.99604	8.58234	9.11701	8.94202	8.63766	9.22173	9.08357	8.65701	9.16256
6241	Q9NP74;Q9NP74-2	Palmdelphin	PALMD	0.204481	-0.211386	-0.415867	no	no	1.1442e-182	2004200000	20	10	16	15	18	15	15	18	8	9	9	9	9	10	52.6	62.757	551	20	21	27	23	19	25	46.6	42.6	47.2	40.7	37.9	49.4	8.4881	8.27811	8.07173	8.50269	8.24554	8.15284	8.63917	8.39777	8.269	8.47144
2479	O43353;O43353-2	Receptor-interacting serine/threonine-protein kinase 2	RIPK2	0.203819	0.972393	0.768574	no	no	2.6968e-45	198390000	5	5	3	2	2	2	0	2	3	2	2	2	0	2	19.3	61.194	540	4	4	3	3	0	2	12.6	9.3	11.1	9.3	0	10.7	7.36504	7.28782	6.57697	7.71719	7.57456	7.16423	7.86199	7.78228	7.08654	7.53915
2063	P02794;G3V192;G3V1D1;E9PKY7;E9PRK8;E9PPQ4	Ferritin heavy chain;Ferritin	FTH1	0.203448	-0.314987	-0.518435	no	no	1.0021e-285	40907000000	14	14	14	13	14	13	12	14	14	13	14	13	12	14	62.8	21.225	183	80	76	72	76	75	76	62.8	62.8	62.8	62.8	62.8	62.8	9.8397	9.5946	9.47445	9.84666	9.56598	9.52429	9.83808	9.60925	9.4504	9.82519
3716	P53355-3;P53355;B7ZLE7;P53355-2;F8WCQ3	Death-associated protein kinase 1	DAPK1	0.203129	0.36201	0.15888	no	no	3.0263e-30	671460000	6	6	5	5	4	3	3	2	5	5	4	3	3	2	6.9	161.24	1440	7	7	7	7	7	5	6	6.2	5.3	4.4	4.4	3.3	8.18495	8.00625	7.713	7.96634	7.73566	7.5813	8.0984	7.88182	7.69245	7.96571
5167	Q8N3C0;E7EW23;E5RFZ0;Q9H5A2	Activating signal cointegrator 1 complex subunit 3	ASCC3	0.201859	-0.00115369	-0.203013	no	no	0	10394000000	45	45	32	32	34	33	33	30	32	32	34	33	33	30	27.7	251.46	2202	71	77	76	81	74	79	20	22	21.3	23	22.4	19.2	9.16888	8.94814	8.7693	9.20271	8.94848	8.84923	9.27694	9.08497	8.82999	9.21205
1460	Q9NZM3;Q9NZM3-2;E9PBE9;Q9NZM3-3;E7EUQ1;Q9NZM3-4;C9JP63;E7EPJ2;H0Y3G5	Intersectin-2	ITSN2	0.201758	-0.276437	-0.478195	no	no	6.7874e-51	683080000	12	10	7	8	9	6	8	8	6	7	8	6	7	7	8.7	193.46	1697	9	13	13	11	11	9	3.8	4.8	5.8	3.3	5.4	4.9	7.83197	7.58335	7.47132	8.06397	7.74266	7.7823	8.15094	7.94731	7.72414	8.03044
6085	Q9H269;Q9H269-2;Q5JUA8;Q5JUA9;Q5JUB0	Vacuolar protein sorting-associated protein 16 homolog	VPS16	0.201534	-0.00748264	-0.209017	no	no	2.4332e-193	3676900000	14	14	9	10	10	8	11	9	9	10	10	8	11	9	20.7	94.693	839	20	23	20	19	25	21	15	15.3	15.1	12.8	17.2	14.1	8.74447	8.53493	8.3274	8.72621	8.46467	8.38175	8.84658	8.64403	8.41797	8.70916
1861	Q5VUC7;O60551;F5H594;Q5VUC6;B4DXS1;E9PE74	Glycylpeptide N-tetradecanoyltransferase;Glycylpeptide N-tetradecanoyltransferase 2	NMT2	0.201475	-0.888227	-1.0897	no	no	2.708e-53	1732500000	10	7	8	9	7	7	7	9	5	6	4	4	4	6	20.6	60.378	529	13	20	17	10	14	15	16.3	18.7	14.9	14.9	13.8	18.1	8.29257	7.99993	7.98298	8.50473	8.09951	8.28769	8.47526	8.14383	8.20265	8.43014
2078	Q9Y3E0;G3V1U5;F5H6U7	Vesicle transport protein GOT1B	GOLT1B	0.201428	0.223862	0.0224342	no	no	2.0718e-23	381770000	2	2	2	2	2	2	2	2	2	2	2	2	2	2	19.6	15.425	138	2	4	3	2	3	3	19.6	19.6	19.6	19.6	19.6	19.6	7.50813	7.15042	7.25722	7.84686	7.60362	7.47914	7.90258	7.71275	7.45169	7.60081
1882	F5H6G2;Q6P6C2;Q6P6C2-2	Probable alpha-ketoglutarate-dependent dioxygenase ABH5	ALKBH5	0.201086	-0.331979	-0.533065	no	no	7.8749e-16	228350000	5	5	2	1	3	2	2	3	2	1	3	2	2	3	25.1	43.018	383	3	1	3	4	3	3	6.3	5.5	16.7	9.4	6.3	12.3	6.8444	6.55978	6.52633	6.63043	6.39026	6.25859	7.46765	7.21911	7.10687	7.817
2055	P52735;F8WEQ4;P52735-2;P52735-3	Guanine nucleotide exchange factor VAV2	VAV2	0.200936	0.000808092	-0.200128	no	no	6.72e-62	2092900000	11	11	8	8	9	8	6	8	8	8	9	8	6	8	15.5	101.29	878	16	13	18	17	13	13	10.8	12.4	13.7	11.6	8.8	9.3	8.5215	8.27992	8.15161	8.41454	8.16328	8.05729	8.60127	8.40502	8.16185	8.56113
2555	O60502;E9PGF9;O60502-2;O60502-3;B4DYV7	Bifunctional protein NCOAT;Protein O-GlcNAcase;Histone acetyltransferase	MGEA5	0.200858	-0.306962	-0.50782	no	no	4.325e-113	2589600000	15	15	12	11	12	12	12	14	12	11	12	12	12	14	20.7	102.91	916	26	31	28	31	27	33	17.4	15.8	18.6	18.6	17.9	19.4	8.51537	8.27763	8.14019	8.58875	8.29541	8.27989	8.74383	8.5259	8.33995	8.58136
897	P30876;C9J2Y9;C9J4M6	DNA-directed RNA polymerase II subunit RPB2;DNA-directed RNA polymerase	POLR2B	0.200815	0.128503	-0.0723115	no	no	3.122e-206	5739300000	26	26	20	19	18	19	21	22	20	19	18	19	21	22	33.7	133.9	1174	38	42	37	38	53	50	26.2	25.5	24.8	23.9	28.4	29	8.83629	8.61621	8.43567	8.9548	8.71549	8.5818	8.88591	8.68654	8.45191	8.83128
4653	Q5SSJ5;Q5SSJ5-2;Q5SSJ5-3;B0QZK4;Q5SWC8;Q5SSJ5-5;B0QZK8;B0QZK9	Heterochromatin protein 1-binding protein 3	HP1BP3	0.20067	-0.458067	-0.658737	no	no	1.3965e-72	10525000000	14	14	12	12	12	13	12	11	12	12	12	13	12	11	28	61.206	553	28	27	26	26	26	26	24.1	24.4	24.1	26	24.1	22.4	9.17254	8.9337	8.79891	9.28952	8.98208	8.99481	9.19193	8.93486	8.842	9.17409
2217	Q8NEZ2;Q8NEZ2-2;H0YBN0	Vacuolar protein sorting-associated protein 37A	VPS37A	0.200395	0.0994172	-0.100978	no	no	8.1313e-45	843810000	3	3	3	3	3	3	3	3	3	3	3	3	3	3	12.1	44.314	397	4	3	3	3	3	4	12.1	12.1	12.1	12.1	12.1	12.1	8.08739	7.92562	7.58014	7.99318	7.73522	7.64432	8.34672	8.15863	7.89263	8.18986
5713	Q96QD9;Q96QD9-2;Q96QD9-3;F6VVD0;Q96QD9-4	UAP56-interacting factor	FYTTD1	0.20028	-0.0576957	-0.257976	no	no	1.5864e-10	481790000	2	2	1	2	1	2	2	2	1	2	1	2	2	2	9.4	35.818	318	2	2	1	6	2	2	5.3	9.4	5.3	9.4	9.4	9.4	7.85168	7.64016	7.43777	7.8591	7.56884	7.54702	7.77815	7.54379	7.39832	8.09363
1479	Q5JSH3;E9PCI7;Q5JSH3-2;Q5JSH3-3;F8W913	WD repeat-containing protein 44	WDR44	0.199991	0.183638	-0.0163536	no	no	9.6656e-85	2742900000	17	17	13	13	14	10	12	11	13	13	14	10	12	11	19.3	101.37	913	25	30	28	24	29	32	13.3	14.3	15.3	12.2	12.7	12.5	8.674	8.4729	8.24296	8.68525	8.44991	8.30679	8.71126	8.53661	8.23124	8.34284
2361	O14730;O14730-2;E7ESK5	Serine/threonine-protein kinase RIO3	RIOK3	0.199915	0.51709	0.317175	no	no	1.8458e-98	712480000	6	6	4	4	5	3	4	3	4	4	5	3	4	3	19.7	59.092	519	7	7	8	6	7	6	12.7	11.9	14.3	7.3	11.9	7.3	8.1378	7.96835	7.6471	7.87704	7.65296	7.48244	8.19106	8.01941	7.70485	8.10616
4029	Q01831;E9PH69;H0YFG7;E7EUB5	DNA repair protein complementing XP-C cells	XPC	0.199837	-0.334225	-0.534061	no	no	1.1486e-37	525990000	8	8	4	3	5	4	4	6	4	3	5	4	4	6	13.6	105.95	940	6	6	6	5	5	7	6.5	4.5	8.5	7.3	7.3	10.2	7.9379	7.70522	7.5557	7.88563	7.5758	7.59323	8.02485	7.77883	7.66086	7.85585
6307	Q9NRY4;Q9NRY4-2;A2RRE5	Rho GTPase-activating protein 35	ARHGAP35;GRLF1	0.199635	-0.409364	-0.608998	no	no	1.1664e-58	774750000	9	9	5	4	4	4	6	5	5	4	4	4	6	5	9.7	172.23	1513	6	7	5	5	8	5	7.1	4.6	5.2	4.7	7.9	6.7	8.31156	8.16744	7.7625	8.06707	7.74346	7.78747	7.91114	7.65729	7.55719	7.91664
1601	E9PJ55;Q9NUJ3;E7EN41	T-complex protein 11-like protein 1	TCP11L1	0.19939	0.0426054	-0.156785	no	no	2.7124e-05	723790000	2	2	1	2	2	1	2	1	1	2	2	1	2	1	6.2	67.238	595	4	5	7	5	5	4	2	6.2	6.2	2	6.2	2	7.84623	7.68606	7.33542	7.99948	7.71098	7.68556	8.19948	8.02296	7.72319	7.94985
3156	P17813;P17813-2;F5GX88;F5H5M0	Endoglin	ENG	0.199257	0.615199	0.415942	no	no	3.8388e-224	35208000000	17	17	16	16	17	15	16	17	16	16	17	15	16	17	26	70.577	658	45	50	52	44	39	46	25.5	26	26	24.5	25.5	26	9.77212	9.62605	9.22791	9.84028	9.66485	9.36182	9.81993	9.65969	9.30927	9.69772
2639	O75448;O75448-2;F5H0K1;F8W9R9;F5H5K2;F5H3E6;F5H2D6;E9PFL1;H0Y4Q9;H0YEG1	Mediator of RNA polymerase II transcription subunit 24	MED24	0.198639	0.0461313	-0.152508	no	no	3.5082e-21	576410000	3	3	2	3	2	2	2	2	2	3	2	2	2	2	4.9	110.3	989	5	6	5	4	5	3	3.7	4.9	3.7	3.7	3.7	3.7	7.96025	7.76023	7.52735	7.928	7.66074	7.59034	8.14644	7.94883	7.70943	8.05629
4728	Q5VU97;Q5VU97-2	VWFA and cache domain-containing protein 1	CACHD1	0.198587	0.444007	0.24542	no	no	1.9193e-34	241530000	3	3	2	2	3	2	2	3	2	2	3	2	2	3	5.3	142.29	1274	7	7	8	6	7	8	2.9	2.9	5.3	2.9	2.9	5.3	7.48097	7.33116	6.94596	7.33604	7.11995	6.92931	7.8757	7.65504	7.47596	7.57093
6797	Q9Y2I7;E9PDH4;E7EQQ9;Q9Y2I7-3;C9JBD9;Q9Y2I7-2	1-phosphatidylinositol 3-phosphate 5-kinase	PIKFYVE	0.198509	-0.0270125	-0.225522	no	no	2.0043e-14	264210000	5	5	4	4	2	3	3	4	4	4	2	3	3	4	3.2	237.13	2098	6	6	4	7	5	6	2.7	2.7	1	2.1	2.1	2.6	7.56671	7.37188	7.12483	7.69741	7.39175	7.40095	7.29541	7.02702	6.9591	7.68108
2598	O75146;H0YH66	Huntingtin-interacting protein 1-related protein	HIP1R	0.19842	-0.0749165	-0.273337	no	no	1.0203e-140	3794900000	20	18	15	15	12	13	15	16	14	13	11	12	14	15	23.7	119.39	1068	28	30	25	24	26	23	18.3	18.4	12.9	14.5	16.8	19.1	8.78382	8.57366	8.36773	8.82986	8.5532	8.50299	8.80188	8.59423	8.38175	8.66004
2389	O14976;E9PGR2;Q6P490;H0Y8H5;D6RAW3;D6RE78;D6RC24;H0Y9M4	Cyclin-G-associated kinase	GAK	0.198362	-0.0329472	-0.23131	no	no	1.2684e-235	4884200000	20	20	13	15	14	16	17	18	13	15	14	16	17	18	19.8	143.19	1311	36	37	34	38	31	40	13	14.2	13.7	15.8	16.7	18.3	8.84785	8.64299	8.42311	8.79817	8.54144	8.44781	8.99193	8.82463	8.49667	8.91623
4759	Q659C4;Q659C4-2;Q659C4-9;G3XAJ5;D6R9W6;H0Y9K3;Q659C4-5;Q659C4-6;Q659C4-7;D6RJB0;G3V0E9;Q659C4-3;Q659C4-4	La-related protein 1B	LARP1B	0.198097	-0.311852	-0.509949	no	no	4.0201e-36	519040000	8	5	4	5	6	7	6	6	2	2	3	4	3	3	11.5	105.32	914	6	5	6	9	7	5	4.5	6.2	6.8	10.4	7.1	7.1	7.88631	7.66287	7.49074	7.94372	7.61016	7.67296	7.90244	7.66228	7.5306	7.87416
4297	Q14191	Werner syndrome ATP-dependent helicase	WRN	0.197994	0.109717	-0.0882773	no	no	2.2453e-07	72698000	2	2	2	2	2	2	2	2	2	2	2	2	2	2	1.3	162.46	1432	2	2	4	3	3	3	1.3	1.3	1.3	1.3	1.3	1.3	7.05258	6.88822	6.55105	6.9317	6.65486	6.60506	7.2785	7.0447	6.89795	7.0167
6404	Q9NWW5;B4DDH6;E7ESV1	Ceroid-lipofuscinosis neuronal protein 6	CLN6	0.197642	-0.554825	-0.752466	no	no	1.3791e-17	198010000	2	2	1	1	2	2	2	1	1	1	2	2	2	1	13.5	35.919	311	1	2	2	2	2	1	6.8	6.8	13.5	13.5	13.5	6.8	7.49535	7.1682	7.21896	6.99368	6.73842	6.64148	7.78325	7.42216	7.53496	7.62557
3736	P53992;E7EP00;G5EA31;B4DZT4	Protein transport protein Sec24C	SEC24C	0.197635	0.131787	-0.065848	no	no	3.3191e-247	8718500000	25	24	18	19	20	19	19	22	17	18	19	19	18	21	31.6	118.32	1094	42	35	37	38	39	35	20	23.4	26	20.8	24	28.6	9.09722	8.89673	8.66515	9.10907	8.86702	8.73979	9.21461	9.02999	8.75408	9.13386
3751	P54886;P54886-2	Delta-1-pyrroline-5-carboxylate synthase;Glutamate 5-kinase;Gamma-glutamyl phosphate reductase	ALDH18A1	0.197418	0.029161	-0.168257	no	no	0	25624000000	33	33	28	29	28	29	31	28	28	29	28	29	31	28	50.3	87.301	795	81	93	77	81	86	78	45.4	44.8	41.5	43.9	49.4	47.9	9.50305	9.31593	9.0472	9.62363	9.38039	9.25592	9.58498	9.40482	9.11588	9.52827
4509	Q2TAA5	GDP-Man:Man(3)GlcNAc(2)-PP-Dol alpha-1,2-mannosyltransferase	ALG11	0.197402	0.393084	0.195682	no	no	1.756e-37	351050000	5	5	5	3	2	3	2	2	5	3	2	3	2	2	17.3	55.65	492	6	4	3	3	2	3	17.3	11.6	10.2	13	6.5	10.2	7.89063	7.72576	7.39016	7.72116	7.49055	7.33602	7.79942	7.65333	7.25527	7.72612
851	Q8TEB9;B9A054;Q8TEB9-2	Rhomboid domain-containing protein 1	RHBDD1	0.197234	0.0417439	-0.15549	no	no	4.6951e-36	379340000	2	2	2	2	1	2	2	2	2	2	1	2	2	2	14.6	35.823	315	4	3	2	3	3	4	14.6	14.6	9.2	14.6	14.6	14.6	7.88181	7.65614	7.48955	7.89059	7.64707	7.52325	7.67555	7.49084	7.21516	7.81323
1809	P43378;F5H2Q4	Tyrosine-protein phosphatase non-receptor type 9	PTPN9	0.196916	0.146867	-0.0500489	no	no	5.6412e-37	536890000	4	4	2	3	3	2	4	3	2	3	3	2	4	3	8.8	68.019	593	5	7	6	5	8	7	5.6	7.6	7.6	5.6	8.8	7.6	7.59109	7.40465	7.13395	7.94444	7.73259	7.53106	8.11163	7.90074	7.69671	7.64164
2592	O75086		mifr-2	0.196673	0.284651	0.0879786	no	no	0.0022213	764920000	1	1	1	1	1	1	1	1	1	1	1	1	1	1	3.9	41.639	386	2	2	2	2	2	2	3.9	3.9	3.9	3.9	3.9	3.9	8.2224	7.99354	7.8348	8.176	7.92233	7.82183	8.07089	7.86601	7.64622	7.82693
5262	Q8NEW0;H0Y362	Zinc transporter 7	SLC30A7	0.196405	0.623554	0.427149	no	no	5.2255e-42	1789100000	7	7	4	4	5	4	6	5	4	4	5	4	6	5	19.7	41.625	376	5	7	9	4	11	6	11.7	14.1	14.1	13.8	17.3	14.6	8.39778	8.26958	7.80533	8.48461	8.29931	8.02535	8.5624	8.41471	8.02222	8.39947
321	Q6YP21;B3KQ13;Q6YP21-2	Kynurenine--oxoglutarate transaminase 3	CCBL2	0.196288	0.0751399	-0.121148	no	no	4.2494e-53	1200200000	10	10	6	7	7	5	7	9	6	7	7	5	7	9	27.1	51.4	454	9	9	10	10	10	12	17.4	20	20	14.8	19.2	25.3	8.08838	7.89797	7.63852	8.25713	7.97117	7.94048	8.35497	8.16083	7.91185	8.29101
5414	Q8WYP5-2;Q8WYP5;C9J5C5	Protein ELYS	AHCTF1	0.196133	-0.177599	-0.373732	no	no	7.8561e-63	1158600000	12	12	6	7	8	9	7	8	6	7	8	9	7	8	7.6	256	2301	8	10	11	9	10	10	4.5	5.1	5.6	6.2	5.1	5.3	8.10254	7.89735	7.67835	8.32358	8.04759	7.99599	8.25561	8.01397	7.88579	8.16212
4540	Q3ZCW2	Galectin-related protein	LGALSL	0.19597	0.407612	0.211642	no	no	1.6842e-10	156060000	1	1	1	1	1	1	1	1	1	1	1	1	1	1	8.1	18.986	172	2	2	2	2	1	2	8.1	8.1	8.1	8.1	8.1	8.1	7.26766	7.12057	6.72599	7.39074	7.18027	6.97517	7.42649	7.28724	6.86478	7.07515
5058	Q8IUR0	Trafficking protein particle complex subunit 5	TRAPPC5	0.195818	0.0291022	-0.166715	no	no	9.7631e-45	1480100000	4	4	4	2	3	4	4	2	4	2	3	4	4	2	30.3	20.783	188	4	4	5	6	5	2	30.3	20.7	25	30.3	30.3	19.7	8.10247	7.90667	7.66228	8.11364	7.89347	7.71316	8.46555	8.25628	8.04801	8.46945
4069	Q05397-5;E7ESA6;Q05397;H0YBP1;Q8IYN9;Q05397-2;H0YBZ1;F5H4S3;H0YB16;Q8N9D7;E9PEI4;Q05397-3;B4DWJ1;Q05397-6;Q05397-4;E5RGA6;H0YB99;E5RFW9;E5RHD8;E5RG86;E5RJP0;E5RI72;E5RG66;E5RH01;E5RH48;E5RJI4;E5RI03;E5RG54;E5RIK4;Q59GM4;E9PBI4;E5RG80;E5RJQ2;H0YB33;E5RI29;H0YAS0;E5RH08	Focal adhesion kinase 1	PTK2	0.195674	-0.00733908	-0.203013	no	no	3.1211e-204	7109800000	35	34	21	23	24	25	27	23	20	22	23	25	27	22	39.7	120.9	1065	41	52	45	53	57	47	24.1	23.9	28.5	27.6	31.6	24.7	8.97296	8.77881	8.52985	8.99498	8.72996	8.65469	9.10295	8.913	8.6523	9.01022
5358	Q8WU76;Q8WU76-2	Sec1 family domain-containing protein 2	SCFD2	0.195268	-0.0903114	-0.28558	no	no	7.796e-19	412920000	4	4	2	4	2	3	3	4	2	4	2	3	3	4	8.6	75.126	684	2	6	4	5	4	5	2.3	8.6	2.3	7.6	4.4	8.6	7.31139	7.13469	6.83549	7.78365	7.51123	7.45199	7.79566	7.61706	7.32352	7.83134
6524	Q9P2J3;Q7Z350	Kelch-like protein 9	KLHL9;DKFZp686L0695	0.19526	0.402321	0.207061	no	no	8.2983e-12	221290000	4	2	1	3	2	1	1	1	1	1	2	1	1	1	8.8	69.428	617	8	8	7	9	7	4	1.6	5	5.3	1.6	1.6	1.6	7.62321	7.45071	7.13884	7.32695	7.11364	6.91592	7.59329	7.42478	7.10058	7.62195
2069	G3V1L9;Q07157;G5E9E7;H0Y3R8;Q07157-2;H0YKB1	Tight junction protein ZO-1	TJP1	0.195232	-0.0632268	-0.258459	no	no	0	8696900000	32	32	22	20	18	21	23	23	22	20	18	21	23	23	22.4	197.46	1768	51	51	53	56	56	57	15.4	14.3	12.3	15.6	15.3	16.5	9.12349	8.91739	8.70077	9.05262	8.7862	8.71396	9.24615	9.05073	8.80528	9.1284
4537	Q3YEC7;Q3YEC7-2;G8JLF3;Q3YEC7-3;F2Z2T0;G3V154;Q3YEC7-6;Q3YEC7-4;C9JJY3;Q3YEC7-5;H0Y7H6;B1AMX5;H0Y4Z8	Rab-like protein 1	PARF;C9orf86	0.194841	-0.18954	-0.384381	no	no	1.0287e-73	1365500000	12	12	8	11	8	11	11	8	8	11	8	11	11	8	23.6	79.548	729	9	13	10	13	13	11	14.3	21.4	13.4	18.5	21.5	17.4	8.16179	7.93033	7.77788	8.49658	8.18932	8.2017	8.33796	8.10823	7.95159	8.40547
993	C9JME2;Q9Y4F1-2;Q9Y4F1;E9PCB0;H0Y6N2;H0Y783	FERM, RhoGEF and pleckstrin domain-containing protein 1	FARP1	0.194779	-0.199625	-0.394404	no	no	2.3256e-17	140380000	4	4	1	1	3	1	2	2	1	1	3	1	2	2	5.4	122.09	1076	3	3	4	2	5	4	1.9	1.9	4.3	1.9	3	3	7.23613	6.91787	6.95169	7.03371	6.70863	6.75548	7.47087	7.18455	7.15461	6.94618
2433	O15305;F5H0W0;B7Z419;Q92871	Phosphomannomutase 2	PMM2	0.194758	-0.137635	-0.332393	no	no	6.3626e-50	5373100000	12	12	11	9	9	9	10	10	11	9	9	9	10	10	44.3	28.082	246	34	28	30	32	32	31	41.5	34.1	31.3	35.8	38.6	35.8	8.9092	8.71353	8.46875	8.869	8.60444	8.52816	8.99638	8.77214	8.60199	8.91862
4257	Q13637;E7ENT2;P57729	Ras-related protein Rab-32	RAB32	0.194319	-0.191057	-0.385376	no	no	1.9611e-51	3545700000	10	9	8	9	9	7	9	9	7	8	8	6	8	8	50.2	24.997	225	25	28	27	21	26	23	40.4	45.3	45.3	41.3	42.7	45.3	8.77027	8.55221	8.36659	8.93672	8.66776	8.60106	8.87988	8.66518	8.47098	8.47567
4234	Q13509;A8K854;G3V2A3;G3V3R4;G3V2R8;G3V5W4;G3V3W7;G3V3J6	Tubulin beta-3 chain	TUBB3	0.194167	1.67775	1.48358	no	no	0	9443800000	22	5	21	22	22	22	21	20	4	5	5	5	4	4	58.4	50.432	450	15	28	21	18	21	21	55.3	58.4	58.4	58.4	56.7	54.4	9.03786	8.97208	8.18574	9.13069	9.0423	8.39594	9.42518	9.35984	8.57036	9.11598
1907	O60315;F5H814;E7EUW9;E7ESP8;F5H601;G3V1R3;H0YKM9;H0YME0;H0YK86;H0YMD3;E7EVG9;C9JU62	Zinc finger E-box-binding homeobox 2	ZEB2	0.193898	0.43263	0.238732	no	no	7.4714e-25	59802000	3	2	3	3	2	2	2	2	2	2	1	1	1	1	3.3	136.45	1214	7	6	5	3	5	5	3.3	3.3	2.6	2.6	2.6	2.6	7.10721	6.96121	6.56284	6.74326	6.52152	6.34516	7.07569	6.91283	6.57085	6.94913
4512	Q2TAZ0-3;Q2TAZ0	Autophagy-related protein 2 homolog A	ATG2A	0.193874	0.121345	-0.0725284	no	no	1.0329e-07	209690000	1	1	1	1	1	1	1	1	1	1	1	1	1	1	0.7	213.08	1940	2	3	2	1	3	2	0.7	0.7	0.7	0.7	0.7	0.7	7.33383	7.15042	6.87098	7.28776	7.02629	6.94318	7.43678	7.26435	6.95227	7.42311
5333	Q8TDB6;Q8TDB6-2	E3 ubiquitin-protein ligase DTX3L	DTX3L	0.193858	-0.0779266	-0.271784	no	no	5.3626e-75	960840000	8	8	7	8	8	7	7	7	7	8	8	7	7	7	14.7	83.553	740	18	21	20	16	17	16	12.2	14.7	14.7	12.6	12.2	12.6	8.14968	7.92932	7.74949	8.20017	7.95558	7.83423	8.25885	8.05671	7.82957	8.05019
4577	Q53FA7;Q53FA7-2	Quinone oxidoreductase PIG3	TP53I3	0.193798	0.111368	-0.0824301	no	no	1.4317e-129	4982300000	14	14	9	11	9	10	11	10	9	11	9	10	11	10	58.4	35.536	332	19	25	22	22	21	22	39.5	47.3	41.3	42.2	50.3	46.7	8.83267	8.62808	8.40749	8.94334	8.70677	8.56658	8.92103	8.72552	8.48032	8.87422
5299	Q8TAA9;Q8TAA9-2	Vang-like protein 1	VANGL1	0.193365	0.0797982	-0.113567	no	no	1.3423e-75	573510000	4	4	4	4	4	2	4	4	4	4	4	2	4	4	6.9	59.974	524	11	8	10	7	9	7	6.9	6.9	6.9	3.2	6.9	6.9	8.10432	7.91662	7.6495	7.72976	7.57855	7.19813	8.11697	7.9651	7.58699	7.93462
3269	P25098;E9PRV7;P35626	Beta-adrenergic receptor kinase 1	ADRBK1	0.193057	-0.440421	-0.633478	no	no	6.3753e-110	951350000	13	13	9	8	9	8	9	8	9	8	9	8	9	8	25.4	79.573	689	14	12	14	16	15	12	19	18.4	20.2	18.6	18.9	18.4	8.14851	7.89902	7.78902	8.15214	7.78774	7.90639	8.28578	8.03419	7.92894	8.17511
2164	G8JLE6;Q8TDZ2-4;Q8TDZ2;Q8TDZ2-2;H0Y6Z4	Protein-methionine sulfoxide oxidase MICAL1	MICAL1	0.19301	0.960497	0.767487	no	no	5.1305e-34	369550000	5	4	2	3	4	3	2	3	2	3	3	3	2	3	7.5	119.82	1086	2	2	3	3	3	4	2	4.1	6.2	4.1	3.4	4.1	7.53343	7.41958	6.89634	7.57986	7.43697	7.02759	7.86006	7.74039	7.24182	7.83799
1544	E9PFY5;F8W9I4		MLLT4	0.192701	-0.0539513	-0.246652	no	no	7.0465e-33	268270000	4	1	3	2	4	3	3	3	1	1	1	1	1	1	22.8	29.108	250	1	3	4	2	1	2	16	13.2	22.8	16	16	16	7.30591	7.02894	6.97943	7.98267	7.63274	7.72558	7.68513	7.39745	7.37031	7.60855
1052	Q9UBW7;C9JYC9;Q5W0Q3	Zinc finger MYM-type protein 2	ZMYM2	0.192681	-0.00216241	-0.194844	no	no	4.3285e-72	325130000	6	6	3	3	4	3	3	4	3	3	4	3	3	4	6.2	154.91	1377	6	4	5	4	4	5	2.3	3.5	4.1	4.1	4.5	4.5	7.95045	7.746	7.52503	7.6213	7.40506	7.21484	7.64232	7.44807	7.19937	7.52433
3891	P62714;E5RJX4	Serine/threonine-protein phosphatase 2A catalytic subunit beta isoform	PPP2CB	0.192397	-0.0284277	-0.220825	no	no	1.3567e-229	1992400000	17	1	14	15	14	17	16	16	1	1	1	1	1	1	65.7	35.575	309	9	8	8	9	8	9	56.3	63.1	58.6	65.7	65.7	65.7	8.43119	8.21898	8.01837	8.44564	8.18952	8.09447	8.61007	8.42663	8.14731	8.47224
4460	Q16512-2;Q16512;Q16512-3	Serine/threonine-protein kinase N1	PKN1	0.192316	-0.130535	-0.322851	no	no	3.4608e-61	1791500000	13	11	9	9	11	11	9	9	8	8	9	9	7	8	15.3	104.67	948	16	19	20	16	18	16	9.4	9.4	11.8	13	9	9.4	8.33165	8.10278	7.94406	8.48025	8.22973	8.12202	8.4692	8.27621	8.02403	8.50189
4185	Q13155;F8W950;A8MU58;F8WCL2	Aminoacyl tRNA synthase complex-interacting multifunctional protein 2	AIMP2	0.192301	0.0234017	-0.168899	no	no	8.792e-73	8084100000	12	12	10	8	7	10	8	10	10	8	7	10	8	10	49.7	35.348	320	19	19	16	18	17	21	44.7	39.7	26.9	47.2	39.7	36.2	9.15293	8.99213	8.64347	9.08016	8.82672	8.72566	9.02698	8.87479	8.49777	9.12094
1035	C9JUT5;Q15751;E7ENU6;H0YNB1	Probable E3 ubiquitin-protein ligase HERC1	HERC1	0.192027	-0.224164	-0.416191	no	no	2.9254e-96	338580000	4	4	3	3	3	3	3	3	3	3	3	3	3	3	1.5	532.35	4862	5	5	5	3	4	5	1.2	1.2	1.2	1.2	1	1.2	7.52778	7.29546	7.1451	7.64836	7.33234	7.36182	7.80438	7.59916	7.38023	7.61883
4372	Q15057	Arf-GAP with coiled-coil, ANK repeat and PH domain-containing protein 2	ACAP2	0.191893	-0.346645	-0.538538	no	no	4.5671e-35	1131300000	9	9	4	6	5	8	5	6	4	6	5	8	5	6	17.6	88.028	778	8	9	8	12	7	10	9.4	12.2	10.8	15	10.9	12.2	8.12323	7.856	7.78554	8.20181	7.88179	7.91898	8.14913	7.9214	7.75989	8.44066
4774	Q69YN4;Q69YN4-3;Q69YN4-2;Q69YN4-4;H0YBN5;H0YB68	Protein virilizer homolog	KIAA1429	0.191859	0.12312	-0.0687396	no	no	6.6964e-189	1760100000	12	12	8	8	8	8	10	10	8	8	8	8	10	10	10.2	202.02	1812	15	13	18	13	17	15	7	7.6	7.6	7.1	8.9	8.9	8.34181	8.16873	7.85859	8.24859	7.98926	7.90144	8.5994	8.40809	8.15122	8.48078
3569	P48449;E9PEI9;G5E9Q9;C9J315	Lanosterol synthase	LSS	0.19184	-0.607579	-0.799419	no	no	3.2411e-151	7213800000	24	24	16	19	15	19	14	16	16	19	15	19	14	16	35.1	83.308	732	34	33	33	32	33	36	24.9	28.3	23.6	29.8	21.3	24.2	8.97555	8.70538	8.64129	9.1038	8.75699	8.8442	9.02572	8.78289	8.65746	9.09975
3184	P19784	Casein kinase II subunit alpha	CSNK2A2	0.19183	0.5205	0.32867	no	no	9.7753e-136	10489000000	15	15	13	13	12	10	14	13	13	13	12	10	14	13	50.9	41.213	350	41	41	40	31	43	40	43.7	39.7	36.9	31.4	45.1	40.9	9.16732	9.02086	8.62407	9.21514	9.01841	8.77656	9.22266	9.06243	8.71203	9.0604
1805	Q86XL3;F5H2H5;Q86XL3-2;F5H417;F5H1E7;A8KAG3;F5H1D4;F5H6J0	Ankyrin repeat and LEM domain-containing protein 2	ANKLE2	0.191659	0.262261	0.0706028	no	no	3.6873e-99	1566200000	14	14	9	8	10	8	5	10	9	8	10	8	5	10	18.8	104.11	938	14	13	11	13	11	13	13	11.5	12.9	8.7	6.6	13.4	8.40663	8.24598	7.89685	8.28939	8.07755	7.87596	8.36894	8.20785	7.86014	8.63622
4621	Q5JRX3;Q5JRX3-2;E9PDX6;C9JSL2;E9PDX7;E7ES23;B1APQ0;H0Y7L7;H0Y4F7;B1APQ1	Presequence protease, mitochondrial	PITRM1	0.191557	-0.0626743	-0.254231	no	no	0	30425000000	37	37	31	32	30	33	30	29	31	32	30	33	30	29	47.1	117.45	1037	76	85	79	83	82	82	43.2	39	39.6	43.4	39	35.9	9.60594	9.41442	9.15812	9.74567	9.488	9.39646	9.71455	9.52678	9.25986	9.6823
2797	O95782;O95782-2;E9PS94;E9PPZ3	AP-2 complex subunit alpha-1	AP2A1	0.191388	-0.162726	-0.354114	no	no	9.2353e-282	15963000000	39	28	25	34	33	32	31	29	17	25	26	22	23	22	45.4	107.54	977	32	40	38	39	44	40	31.3	41	41.2	39.5	38.7	36.2	9.29552	9.08106	8.88629	9.41273	9.1329	9.08941	9.43556	9.2319	9.00886	9.37429
4250	Q13616;E7EWR0;B3KTW0	Cullin-1	CUL1	0.191271	-0.124063	-0.315334	no	no	3.7745e-240	9903500000	18	18	12	15	11	15	13	13	12	15	11	15	13	13	31.1	89.677	776	36	37	29	32	31	30	21.5	25.9	20.2	24.7	24.9	24.7	9.20142	9.01153	8.75066	9.17978	8.92239	8.83022	9.13691	8.95135	8.67814	9.31965
6312	Q9NS00;Q9NS00-2;C9K0C8;C9JDX1	Glycoprotein-N-acetylgalactosamine 3-beta-galactosyltransferase 1	C1GALT1	0.190941	0.494395	0.303454	no	no	3.5033e-101	348920000	3	3	1	1	3	2	2	3	1	1	3	2	2	3	18.2	42.202	363	2	1	5	5	4	5	3	3	18.2	13.2	13.2	18.2	7.2911	7.18193	6.63798	7.3158	7.06796	6.95417	7.91836	7.72712	7.47003	7.70423
1750	Q9H3K2;F5GZL5;Q5VT94;Q9Y6G2	Growth hormone-inducible transmembrane protein	GHITM	0.190937	-0.0643259	-0.255263	no	no	1.1419e-17	1060900000	4	4	2	3	2	1	2	3	2	3	2	1	2	3	11.6	37.205	345	1	4	3	1	2	3	6.1	9	6.1	2.9	6.1	8.7	8.3597	8.05408	8.06318	8.20238	7.94719	7.85009	8.04076	7.84911	7.59323	6.91508
324	B3KQT9;P30101;G5EA52;F5H119	Protein disulfide-isomerase A3	PDIA3	0.19088	0.159202	-0.0316775	no	no	0	226160000000	46	45	40	42	40	42	42	40	39	41	39	41	41	39	77.5	54.102	480	249	252	266	240	240	244	65.2	71.9	71.5	74.6	62.9	65.2	10.5431	10.3696	10.0607	10.5636	10.3436	10.1629	10.6477	10.4609	10.1913	10.4654
1527	O75915;E9PER8;B4DWQ6;F8WF33;C9JQU6;F8WF90	PRA1 family protein 3	ARL6IP5	0.190163	0.484388	0.294226	no	no	1.4459e-35	16038000000	6	6	6	5	6	6	6	5	6	5	6	6	6	5	31.9	21.614	188	19	20	18	22	17	19	31.9	27.1	31.9	31.9	31.9	27.1	9.40659	9.27349	8.82812	9.34427	9.16835	8.86684	9.51064	9.38254	8.91795	9.49567
6675	Q9UL18;Q5TA58;Q9HCK5	Protein argonaute-1	EIF2C1	0.1901	-0.191184	-0.381283	no	no	5.0145e-83	1209200000	11	7	9	8	7	7	8	6	6	6	4	6	6	4	18.2	97.213	857	16	15	9	18	16	14	16.7	13.5	12	13.5	15.1	10.5	8.34455	8.12077	7.9495	8.22768	7.92908	7.92419	8.10887	7.87481	7.72861	8.46696
4252	Q13619;A8MSH7;Q13619-2	Cullin-4A	CUL4A	0.189984	-0.0908535	-0.280838	no	no	2.9544e-144	2688600000	27	14	15	22	22	18	20	20	5	10	10	7	10	8	37.2	87.679	759	11	20	14	10	16	15	19.5	30	31.6	23.2	27.4	28.1	8.47492	8.27351	8.04438	8.80447	8.53988	8.46367	8.74032	8.52617	8.33054	8.28787
4602	Q59F66;Q92841;Q92841-3;Q92841-2;Q92841-1;C9JMU5;Q9UQL5;G5E9L5	Probable ATP-dependent RNA helicase DDX17	DDX17	0.189914	-0.289834	-0.479748	no	no	7.2112e-233	33963000000	36	27	36	34	33	33	32	30	27	25	24	24	23	21	53.6	81.067	737	81	86	78	84	85	84	53.6	51.4	50.9	51.4	48.7	44.2	9.68263	9.45908	9.28724	9.71952	9.41671	9.42029	9.7286	9.50995	9.3258	9.73586
4001	Q00534	Cyclin-dependent kinase 6	CDK6	0.189796	0.532741	0.342946	no	no	1.2869e-41	446760000	4	3	3	3	3	4	3	4	2	2	2	3	2	3	17.8	36.938	326	6	5	5	7	6	4	12.3	12.3	12.3	17.8	12.3	17.8	7.87678	7.74121	7.30514	7.92419	7.74907	7.44512	7.97381	7.84618	7.37974	7.92392
529	O60353;B4DRN0;B4E236;G5EA13	Frizzled-6	FZD6	0.189684	-0.0932898	-0.282973	no	no	0.00011603	117480000	2	2	1	1	2	2	1	1	1	1	2	2	1	1	5	79.291	706	2	2	3	3	2	2	1.3	1.3	5	5	1.3	1.3	6.72861	6.4979	6.34364	6.40133	6.18814	5.9901	7.9522	7.83122	7.33806	6.98236
1322	Q8TBA6;Q8TBA6-2;E7EQP0	Golgin subfamily A member 5	GOLGA5	0.189504	0.152051	-0.0374525	no	no	2.574e-75	951850000	4	4	3	3	3	3	4	4	3	3	3	3	4	4	7.3	83.023	731	8	9	7	8	9	10	7.3	7.3	7.3	7.3	7.3	7.3	8.20946	8.04813	7.70117	7.95386	7.73914	7.545	8.32228	8.13941	7.85839	8.39604
3551	P46940;H0YLE8;F5H7A1;H0YKA5;E9PDT6	Ras GTPase-activating-like protein IQGAP1	IQGAP1	0.189433	-0.419755	-0.609188	no	no	0	157580000000	86	84	81	82	78	81	81	78	79	81	77	79	79	76	57.5	189.25	1657	320	331	303	313	304	301	55.1	55.5	54	54.3	56	53.8	10.3328	10.0972	9.95462	10.4069	10.1008	10.1109	10.4763	10.2431	10.0948	10.3712
5091	Q8IWT6	Leucine-rich repeat-containing protein 8A	LRRC8A	0.189392	-0.281431	-0.470823	no	no	1.7799e-97	3371600000	19	18	16	14	15	10	12	15	15	13	15	10	12	15	23.1	94.198	810	20	21	20	16	18	21	22.3	19	20.9	14.6	16.2	18.1	8.75345	8.51805	8.37506	8.81757	8.52312	8.50983	8.77938	8.53749	8.40987	8.65727
649	E7ER46;Q8NEM7;F5GX46;B4E2D5;Q8NEM7-2;C9JQS2	Protein FAM48A	FAM48A	0.189178	-0.139199	-0.328377	no	no	1.8413e-45	152390000	3	3	3	1	2	2	3	2	3	1	2	2	3	2	3.9	88.04	811	3	1	3	2	3	3	3.9	2	3.8	3.8	3.9	3.8	7.44292	7.17886	7.10147	6.74313	6.34359	6.52235	7.46362	7.233	7.07857	7.60175
6888	Q9Y4K1;B4DU04;Q96QW7;F5H7N3	Absent in melanoma 1 protein	AIM1	0.189168	-0.152248	-0.341417	no	no	1.8631e-44	300220000	10	10	5	4	1	6	6	5	5	4	1	6	6	5	11.5	188.67	1723	7	8	3	10	9	6	5	3.5	0.8	6.8	7.3	4.2	7.72594	7.52847	7.28865	7.61743	7.35917	7.26895	7.29294	7.05323	6.92049	7.98768
1319	Q99973;Q99973-2;E7EQE3;G3V5X7;G3V470;G3V2A4;G3V591;H0YIY9;H0YIZ2	Telomerase protein component 1	TEP1	0.189052	-0.776862	-0.965913	no	no	5.1682e-53	612940000	11	11	6	4	4	4	7	7	6	4	4	4	7	7	6.3	290.49	2627	7	6	6	7	10	7	4.3	2.2	2.8	2.6	5	3.9	7.8657	7.57638	7.55264	7.96097	7.70696	7.60721	7.94551	7.6228	7.66513	8.18974
5557	Q96CW5;Q96CW5-2;Q96CW5-3	Gamma-tubulin complex component 3	TUBGCP3	0.18899	-0.393855	-0.582845	no	no	3.2019e-113	2433400000	13	13	8	11	8	11	10	9	8	11	8	11	10	9	19.7	103.57	907	18	25	17	23	26	21	12.3	17.1	12.3	17	15.5	13.5	8.31867	8.11588	7.89048	8.66062	8.38194	8.33602	8.45125	8.22	8.06703	8.70684
5266	Q8NFA0;Q7Z5T3	Ubiquitin carboxyl-terminal hydrolase 32	USP32	0.188967	-0.13711	-0.326077	no	no	7.2153e-32	255780000	4	4	2	3	4	3	3	3	2	3	4	3	3	3	3.3	181.65	1604	3	5	5	4	4	3	1.7	2.6	3.3	2.6	2.6	2.6	7.55688	7.32769	7.16973	7.43326	7.14019	7.12411	7.75144	7.5529	7.31601	7.80177
769	Q16698;B7Z6B8;E5RFV2;E5RJG7;E5RJD2;E5RID6;H0YAW3	2,4-dienoyl-CoA reductase, mitochondrial	DECR1	0.188901	-0.0655722	-0.254473	no	no	4.1348e-100	14645000000	13	13	12	12	12	13	12	13	12	12	12	13	12	13	42.7	36.067	335	29	28	30	30	28	30	40.6	40.6	38.8	42.7	40.6	42.7	9.23603	9.01982	8.82946	9.37088	8.96517	9.15412	9.24697	9.04521	8.81707	9.47601
6055	Q9H0J9;G5E9U9;F5H4A5	Poly [ADP-ribose] polymerase 12	PARP12	0.188862	0.279389	0.0905265	no	no	3.1275e-38	742030000	7	7	6	5	5	6	7	5	6	5	5	6	7	5	13.7	79.063	701	16	11	11	10	15	14	10	8.8	10	10	13.7	8.8	8.29511	8.13146	7.79196	7.50382	7.29697	7.08235	8.07207	7.91673	7.55018	8.11035
3905	P62873;B1AKQ9;B1AKQ8;B1AKQ7;H0Y418;P16520;E9PCP0;F5H0S8;F5H8J8;F5H100	Guanine nucleotide-binding protein G(I)/G(S)/G(T) subunit beta-1	GNB1	0.188382	-0.161436	-0.349818	no	no	1.8508e-212	9884600000	15	8	13	13	13	15	14	13	7	7	7	8	8	7	65.3	37.377	340	27	28	27	27	29	29	57.4	57.4	57.4	65.3	58.5	57.4	9.12675	8.92197	8.70186	9.17231	8.88133	8.861	9.22178	9.0209	8.79038	9.21756
4819	Q6P1N0;Q6P1N0-2;Q6P1N0-3;C9J1T8;E9PGJ9	Coiled-coil and C2 domain-containing protein 1A	CC2D1A	0.188307	-0.40021	-0.588517	no	no	4.9678e-58	453760000	9	9	5	2	4	6	5	5	5	2	4	6	5	5	9.7	104.06	951	4	2	4	6	5	5	6.4	1.9	5.2	6.8	5.3	6.3	7.90295	7.7242	7.43111	7.083	6.74323	6.81757	7.92293	7.72128	7.49279	8.09388
1424	E9PKS3;P17405;G3XAB5;P17405-2;E7EWE2;P17405-3;H0YEP5;E9PQT3;G3V1E1	Sphingomyelin phosphodiesterase	SMPD1	0.188042	0.516821	0.328779	no	no	4.8325e-44	976410000	4	4	4	4	4	4	4	4	4	4	4	4	4	4	7.3	69.807	630	10	9	12	9	10	10	7.3	7.3	7.3	7.3	7.3	7.3	8.16622	7.99828	7.67237	8.23952	8.04961	7.78886	8.36127	8.22701	7.78606	8.11311
3327	P29317	Ephrin type-A receptor 2	EPHA2	0.187982	0.682071	0.494089	no	no	5.5082e-290	9497000000	24	23	17	20	20	19	18	18	16	20	20	18	18	17	34.9	108.27	976	55	52	55	47	47	47	26.3	28.5	30.1	30.4	29.6	26.6	9.14928	9.01924	8.56223	9.19758	9.02391	8.71561	9.294	9.16116	8.71482	9.1122
5600	Q96FN4;Q719H8	Copine-2	CPNE2	0.187902	-0.581785	-0.769687	no	no	1.2169e-75	2704900000	11	10	8	9	9	7	9	8	7	8	8	6	8	7	31	61.189	548	20	20	21	18	22	16	20.1	24.5	23.4	18.6	23.4	17.9	8.59594	8.31848	8.27	8.49315	8.17167	8.21165	8.79011	8.5233	8.45192	8.53139
5645	Q96IZ0;H0YHP5;H0YI16;F8W1M8	PRKC apoptosis WT1 regulator protein	PAWR	0.187852	0.124487	-0.0633648	no	no	1.5097e-217	7903700000	10	9	8	7	7	6	8	7	7	6	6	5	7	6	37.9	36.567	340	15	15	13	12	16	14	27.9	33.8	33.8	31.8	27.9	32.9	9.20123	9.04844	8.67343	9.19201	8.9928	8.75775	9.24534	9.07251	8.76163	8.98661
5254	Q8NE71;Q8NE71-2;H0YGW7;E9PC67;F8VQZ0;Q5STZ8;Q5STZ7	ATP-binding cassette sub-family F member 1	ABCF1	0.187794	0.407383	0.219589	no	no	0	13831000000	20	20	17	16	16	18	17	16	17	16	16	18	17	16	28.5	95.925	845	47	39	44	43	48	44	23.2	21.9	23.4	25.9	23.2	21.9	9.11544	8.95721	8.60024	9.11163	8.88902	8.71485	9.71124	9.56254	9.17354	9.35807
2781	O95486;O95486-2	Protein transport protein Sec24A	SEC24A	0.187166	0.123387	-0.063779	no	no	1.1178e-86	3200500000	13	12	6	9	7	7	8	8	6	9	7	7	7	8	14.7	119.75	1093	11	13	12	11	10	15	8.1	11.7	7.2	9.4	9.7	10	8.61602	8.36278	8.26129	8.67869	8.41601	8.3356	8.80712	8.63811	8.31547	8.48409
3786	P56589;Q7Z6V3	Peroxisomal biogenesis factor 3	PEX3	0.187037	0.532491	0.345454	no	no	7.2668e-10	814450000	2	2	2	2	2	2	2	2	2	2	2	2	2	2	11.3	42.139	373	3	7	3	5	6	7	11.3	11.3	11.3	11.3	11.3	11.3	7.75475	7.62936	7.15403	8.01494	7.78745	7.62531	8.25249	8.18104	7.43334	7.84693
6115	Q9H4E5;Q9H4E5-2;G3V476	Rho-related GTP-binding protein RhoJ	RHOJ	0.186406	-0.0527472	-0.239154	no	no	2.7695e-15	399260000	4	3	3	3	2	2	2	2	2	2	1	1	1	1	24.3	23.82	214	4	3	1	2	2	3	19.2	16.8	11.7	11.7	11.7	11.7	7.80985	7.5954	7.40057	8.15119	7.87039	7.8289	7.16242	6.88764	6.83343	7.49835
5445	Q92621;F8WCW4;F2Z2D0;E7ET25	Nuclear pore complex protein Nup205	NUP205	0.185909	-0.0802483	-0.266157	no	no	0	10806000000	40	40	25	33	26	25	31	26	25	33	26	25	31	26	26.1	227.92	2012	56	64	50	59	63	56	16.9	21.2	19.6	15.8	20.8	18.5	9.14408	8.947	8.70607	9.23137	8.94899	8.91086	9.27091	9.09209	8.79918	9.28675
4405	Q15417;B4DFK6;F8WA86;E9PDU6;P51911;B4DUX6;B7Z7E1	Calponin-3	CNN3	0.185302	-0.621806	-0.807107	no	no	2.0415e-138	12419000000	15	14	13	14	13	12	12	14	12	13	12	11	11	13	53.5	36.413	329	38	42	48	41	37	44	48	50.2	48	47.7	45.9	50.2	9.23887	8.9633	8.91081	9.26036	8.93069	8.98618	9.41554	9.13663	9.09121	9.26848
148	Q96LT9;A8K1C9;E9PPV2;H0YEY9	RNA-binding protein 40	RNPC3	0.185257	-0.244278	-0.429536	no	no	4.1742e-17	258240000	3	3	1	1	1	2	1	2	1	1	1	2	1	2	6.4	58.574	517	3	2	2	3	3	4	3.1	3.1	3.1	5	3.1	4.4	7.44256	7.2072	7.06412	7.49786	7.19229	7.20132	7.63958	7.4297	7.22303	7.75199
6123	Q9H4L5;Q9H4L5-2;Q9H4L5-3;Q9H4L5-4;Q9H4L5-5;Q9H4L5-6;Q9H4L5-7;Q9H4L5-8	Oxysterol-binding protein-related protein 3	OSBPL3	0.185181	-0.114767	-0.299948	no	no	2.7275e-149	5414800000	18	18	17	18	14	16	16	17	17	18	14	16	16	17	28.7	101.22	887	41	45	36	44	40	36	27.5	28.7	23.7	23.8	25.7	26	8.90518	8.70427	8.47381	8.86945	8.59312	8.54224	8.97598	8.76955	8.55382	8.95513
4964	Q7Z6J6;Q7Z6J6-2;B5MC67;F8WCI0;F8WEJ8;F8WD70	FERM domain-containing protein 5	FRMD5	0.184751	0.0681203	-0.116631	no	no	5.7566e-07	187390000	2	2	2	1	2	2	2	2	2	1	2	2	2	2	4.2	65.064	570	3	2	3	3	4	4	4.2	3	4.2	4.2	4.2	4.2	7.41116	7.20379	6.99058	7.45867	7.23797	7.059	7.61067	7.47839	7.02991	7.39275
5720	Q96R06;F5GZT2	Sperm-associated antigen 5	SPAG5	0.184515	0.466217	0.281702	no	no	6.3056e-64	271640000	7	7	3	3	2	4	3	3	3	3	2	4	3	3	10.8	134.42	1193	3	6	4	6	5	5	4.5	5.3	3	7	4.7	5.3	7.51112	7.41343	6.81523	7.56041	7.38126	7.08934	7.60872	7.44542	7.10483	7.72897
3663	P51178;B3KR14	1-phosphatidylinositol 4,5-bisphosphate phosphodiesterase delta-1	PLCD1	0.184457	-0.0692898	-0.253747	no	no	1.8579e-50	281100000	6	6	3	3	4	3	4	5	3	3	4	3	4	5	13.1	85.664	756	5	5	5	5	5	5	9.5	9.5	12	9.5	9.5	10.6	7.57931	7.35276	7.18834	7.52434	7.25549	7.18853	7.80515	7.58764	7.40062	7.6986
3538	P46459;F5H2E1;B4DFA2	Vesicle-fusing ATPase	NSF	0.183971	0.0388805	-0.145091	no	no	1.9936e-270	14600000000	29	28	22	26	19	21	22	20	21	25	18	20	21	19	47.6	82.593	744	54	63	46	61	62	57	36.4	44.9	33.3	32.3	36.2	32	9.36493	9.14746	8.96035	9.39169	9.11935	9.05994	9.47235	9.25727	9.06405	9.3324
1208	Q9H2U2-2;Q9H2U2;E2QRM6;Q9H2U2-3;F8WDN9;H0Y9D8;D6R967;B4DFH3;D6RGV9;Q9H2U2-4;D6RGI1;D6RAD3;H0YAK2	Inorganic pyrophosphatase 2, mitochondrial	PPA2	0.183699	-0.774587	-0.958286	no	no	3.241e-137	11083000000	13	13	12	12	11	12	12	13	12	12	11	12	12	13	37.2	39.638	349	36	33	36	33	32	35	35.2	35.2	35.2	35.2	35.2	37.2	9.23543	8.93554	8.93324	9.18789	8.82185	8.94339	9.36678	9.10182	9.02645	9.32083
1296	P33121;P33121-2;E7EPM6;B7Z452;B7Z3Z9;D6RER0;H0Y9U7;H0Y9Z9;D6RG07	Long-chain-fatty-acid--CoA ligase 1	ACSL1	0.183598	-0.160662	-0.34426	no	no	3.6504e-93	3224700000	12	12	10	9	10	10	9	8	10	9	10	10	9	8	22.5	77.942	698	26	25	24	22	25	18	19.3	17.6	19.8	18.8	17.8	16.6	8.68164	8.47686	8.25679	8.74024	8.4569	8.42076	8.72579	8.53038	8.2849	8.76234
6134	Q9H6A9;Q9H6A9-3	Pecanex-like protein 3	PCNXL3	0.18356	-0.225152	-0.408712	no	no	1.9629e-11	77440000	2	2	1	1	2	1	1	2	1	1	2	1	1	2	0.9	222.04	2034	6	5	5	7	4	5	0.5	0.5	0.9	0.5	0.5	0.9	7.03209	6.7843	6.67042	6.83884	6.53551	6.5401	7.17731	6.96012	6.77231	7.23218
3325	Q5VZU9;P29144	Tripeptidyl-peptidase 2	TPP2	0.183445	-0.475293	-0.658737	no	no	2.0477e-180	9269600000	32	32	21	25	25	23	24	25	21	25	25	23	24	25	28.8	139.76	1262	40	52	42	40	45	44	22.8	25	25.4	23.7	24.2	24.6	9.04419	8.78769	8.69355	9.28436	8.98423	8.98243	9.18381	8.9437	8.8119	9.11694
732	B7Z3B7;F5H569;Q93050;Q93050-1;B7Z641;F5H1T6	V-type proton ATPase 116 kDa subunit a isoform 1	ATP6V0A1	0.183396	-0.257131	-0.440527	no	no	1.6311e-76	1686600000	11	10	8	9	8	9	8	8	8	8	7	9	8	8	16.9	96.599	838	13	12	11	11	13	8	12.9	13.4	12.4	14.2	12.9	13.2	8.44846	8.12827	8.16575	8.48306	8.13402	8.22528	8.41792	8.17918	8.04415	8.42415
3556	E7EQ40;B1AK88;P47756-2;B1AK87;P47756;B1AK85;F6USW4;F6Q0E3	F-actin-capping protein subunit beta	CAPZB	0.182924	-0.20201	-0.384934	no	no	0	43416000000	23	22	18	19	20	20	19	18	17	18	19	19	18	17	58.4	37.455	334	85	94	94	94	87	86	47	46.4	48.5	58.4	47	48.5	9.80329	9.58346	9.40233	9.86989	9.58524	9.55184	9.86506	9.64716	9.46111	9.82324
2706	O94808;E5RJP4	Glucosamine--fructose-6-phosphate aminotransferase [isomerizing] 2	GFPT2	0.182628	1.37307	1.19044	no	no	1.1113e-110	643040000	10	6	7	6	7	7	9	8	3	2	3	3	5	4	20.2	76.93	682	3	5	7	7	9	8	13.8	12.2	13.6	13.9	18.6	16	7.65671	7.50807	7.11886	7.75075	7.5902	7.2408	8.27068	7.98355	7.9553	7.97267
5191	Q8N5U6-2;Q8N5U6;H0YGX5;H0YFN9;H0YF69	RING finger protein 10	RNF10	0.182217	-0.00339546	-0.185613	no	no	2.478e-24	574360000	4	4	1	1	1	2	2	3	1	1	1	2	2	3	12.5	90.496	816	2	2	1	3	3	3	3.2	3.2	3.2	7.6	5.6	8.1	7.57973	7.46075	6.95927	7.34684	7.087	7.0003	7.20618	6.95515	6.84866	8.60784
3861	P62140;E7ETD8;C9JP48;C9J9S3	Serine/threonine-protein phosphatase PP1-beta catalytic subunit;Serine/threonine-protein phosphatase	PPP1CB	0.182121	0.0413428	-0.140779	no	no	8.883e-235	3017400000	19	4	16	16	18	16	16	18	3	4	4	4	4	4	52	37.186	327	5	6	6	5	7	7	44	48	51.7	48.6	48.6	52	8.48969	8.26052	8.10247	8.76544	8.49268	8.43417	8.62348	8.48065	8.071	8.61862
4303	Q14240-2;Q14240;E7EQG2;Q9NZE6;E7EMV8	Eukaryotic initiation factor 4A-II	EIF4A2	0.182054	-0.106482	-0.288536	no	no	8.2877e-216	2694600000	22	7	19	20	22	19	20	18	5	5	7	5	6	5	47.1	46.489	408	20	17	22	19	20	16	39.5	44.1	47.1	39.5	42.2	34.8	8.76673	8.50979	8.41662	8.74844	8.50044	8.387	8.82652	8.58394	8.45793	8.42496
6073	Q9H1C4;E9PNE5;A6NGZ7	Protein unc-93 homolog B1	UNC93B1	0.181904	-0.196607	-0.378512	no	no	2.0565e-26	200650000	3	3	2	3	2	2	2	3	2	3	2	2	2	3	5.4	66.63	597	10	11	9	9	9	10	2.7	5.4	2.7	2.7	2.7	5.4	7.47632	7.27658	7.04297	7.38435	7.11601	7.04798	7.45398	7.22861	7.06126	7.59384
4258	Q13643	Four and a half LIM domains protein 3	FHL3	0.181669	0.0320198	-0.14965	no	no	3.3606e-76	3476800000	11	11	7	9	7	7	7	10	7	9	7	7	7	10	53.9	31.192	280	20	20	20	15	17	19	35.7	46.4	30	30	35.7	46.8	8.7508	8.56383	8.29466	8.79886	8.56098	8.4239	8.80934	8.58853	8.40981	8.63596
6629	Q9UJ70;C9JEV6;H0YEB7;C9JB48;H0YC94;E9PPU6;H0YF44	N-acetyl-D-glucosamine kinase	NAGK	0.181486	0.0794322	-0.102053	no	no	1.6846e-128	11246000000	13	13	12	10	12	8	11	12	12	10	12	8	11	12	54.4	37.375	344	28	28	32	27	26	30	50.6	37.5	50.6	38.4	41	52.3	9.26668	9.06123	8.84295	9.17632	8.90523	8.84313	9.31211	9.11019	8.88249	9.10809
6025	Q9C0J8;Q9C0J8-2;Q6NUQ0;C9J8B4;B9A053	pre-mRNA 3 end processing protein WDR33	WDR33	0.181474	0.127668	-0.0538065	no	no	2.3863e-63	1169200000	8	8	3	5	6	6	3	6	3	5	6	6	3	6	9.9	145.89	1336	6	10	12	11	9	12	4.2	5.3	8.5	7.3	4.2	5.9	7.86455	7.67021	7.42178	8.19852	7.97949	7.79631	8.48646	8.29179	8.04427	8.30903
3386	P33176;Q12840;H0YIN5;C9JWB9	Kinesin-1 heavy chain	KIF5B	0.181062	0.0934634	-0.0875986	no	no	0	26379000000	48	38	41	42	41	41	43	41	33	32	33	33	35	33	55	109.68	963	103	106	96	106	105	102	49.7	51	49	50.8	51.4	49.6	9.51818	9.32638	9.07089	9.6567	9.41727	9.28384	9.66067	9.47576	9.20063	9.59922
5041	Q86Y07;Q86Y07-3;E9PFA9;Q86Y07-2;Q86Y07-5;Q86Y07-4;E7ERS5;E9PBU1	Serine/threonine-protein kinase VRK2	VRK2	0.181012	0.549134	0.368123	no	no	1.2339e-92	3170600000	10	10	8	7	6	8	6	7	8	7	6	8	6	7	30.9	58.14	508	17	16	12	16	18	14	27.8	26	23.8	25.4	23.8	24.4	8.5025	8.34475	7.98615	8.86218	8.47508	8.63295	8.60548	8.46928	8.03559	8.72193
3112	P15848;Q8N322	Arylsulfatase B	ARSB	0.180976	0.828511	0.647535	no	no	2.3741e-30	584980000	5	5	4	4	3	4	4	2	4	4	3	4	4	2	12.4	59.687	533	3	3	5	4	3	2	10.7	8.8	8.1	9.8	10.7	6.2	7.90823	7.80142	7.24674	7.7955	7.64227	7.26872	8.14777	8.01745	7.56149	8.10857
3693	P52294;C9JYI4;C9J4U1;F2Z3G4;C9JWD9;C9J352	Importin subunit alpha-1	KPNA1	0.180772	0.347582	0.16681	no	no	1.2211e-77	1092000000	10	3	7	10	9	9	10	8	3	3	3	3	3	3	22.7	60.221	538	10	11	7	12	10	9	17.5	22.7	21.4	21.4	22.7	19.3	8.12775	7.94095	7.67126	8.28128	8.05607	7.88838	8.21051	8.03326	7.73565	8.4866
4146	Q12899;A2AE48;Q5SPU2;A2AE51;A2AE50	Tripartite motif-containing protein 26	TRIM26	0.180615	0.644442	0.463828	no	no	3.2616e-41	621910000	10	10	5	3	7	2	6	5	5	3	7	2	6	5	18.7	62.165	539	12	10	14	10	12	12	11.1	3.5	14.5	3.2	7.2	7.4	8.11581	7.97387	7.56115	7.70093	7.52056	7.23223	8.14638	7.9928	7.6204	7.9936
4420	Q15628	Tumor necrosis factor receptor type 1-associated DEATH domain protein	TRADD	0.179831	-0.151989	-0.33182	no	no	3.1325e-57	2443800000	5	5	3	3	3	4	4	4	3	3	3	4	4	4	22.4	34.247	312	6	7	7	8	11	9	13.5	13.5	13.5	16.7	16.7	19.2	8.55748	8.35467	8.12934	8.48858	8.22233	8.14971	8.6634	8.44514	8.26002	8.6724
6356	Q9NV70;Q9NV70-2	Exocyst complex component 1	EXOC1	0.17935	-0.330903	-0.510253	no	no	2.0427e-160	4491600000	22	22	15	18	13	14	14	15	15	18	13	14	14	15	31.7	101.98	894	36	36	35	32	41	38	22.4	25.1	20.5	20.9	21.4	23.9	8.85959	8.63964	8.4588	8.81554	8.52437	8.50443	8.86987	8.64943	8.46981	8.75631
374	O95453;B4DDG8;B4DWR4;B4DSB0;F5H1Z4	Poly(A)-specific ribonuclease PARN	PARN	0.179277	-0.103934	-0.283211	no	no	3.6642e-51	1865500000	10	10	8	8	6	9	8	8	8	8	6	9	8	8	24.3	73.45	639	18	16	15	18	19	15	17.8	13.6	15	22.7	16.6	21	8.32948	8.08881	7.95835	8.23512	7.92953	7.93863	8.35228	8.13466	7.94793	8.60813
4519	Q32P28;Q32P28-3;B4DNM8;Q32P28-2;E2QRI1	Prolyl 3-hydroxylase 1	LEPRE1	0.179159	0.0455952	-0.133564	no	no	6.8959e-127	7647300000	16	16	14	15	13	12	14	14	14	15	13	12	14	14	35.5	83.393	736	29	32	34	30	31	28	32.1	34.1	25.4	27.9	31	31	9.12992	8.9375	8.6837	9.08196	8.83945	8.71326	9.16435	8.96202	8.73534	9.11424
4097	Q08379;Q08379-2	Golgin subfamily A member 2	GOLGA2	0.178869	-0.100305	-0.279174	no	no	2.7677e-55	325130000	12	6	5	6	4	4	4	5	3	3	2	4	2	2	18.6	113.08	1002	3	4	3	4	2	3	7.4	7.5	7.2	6.3	6.2	5.6	7.75565	7.50541	7.39709	7.71733	7.45492	7.37392	7.91553	7.6476	7.57866	7.75505
4524	Q3KQU3;Q3KQU3-4;Q3KQU3-2;C9JIR3;B5MDZ6;A1L1B7;Q3KQU3-3;E9PLH3;H0YF21	MAP7 domain-containing protein 1	MAP7D1	0.178846	0.522945	0.344099	no	no	1.8483e-55	1066000000	11	11	6	5	6	9	7	7	6	5	6	9	7	7	14.9	92.819	841	14	14	9	15	13	9	8.4	5.5	8.3	12.2	8.6	8.1	8.27418	8.12512	7.73736	8.20003	7.99938	7.76822	8.36762	8.22121	7.82426	8.33043
6556	Q9UBV7;F5H4G5;D6RJI5;H0Y9D6	Beta-1,4-galactosyltransferase 7;Xylosylprotein 4-beta-galactosyltransferase	B4GALT7	0.178819	0.297608	0.11879	no	no	3.9626e-21	363730000	2	2	2	2	2	2	2	2	2	2	2	2	2	2	8.6	37.405	327	5	5	5	6	5	4	8.6	8.6	8.6	8.6	8.6	8.6	7.78845	7.6298	7.2742	7.73512	7.52598	7.31739	7.86416	7.71984	7.31553	7.85156
6278	Q9NR09	Baculoviral IAP repeat-containing protein 6	BIRC6	0.178599	-0.0528332	-0.231432	no	no	1.5169e-105	1396300000	16	16	12	11	8	9	11	10	12	11	8	9	11	10	6.7	530.25	4857	15	15	10	10	15	13	4.9	4.4	4	4	5	3.2	8.48636	8.24351	8.11813	8.17304	7.86589	7.87803	8.51675	8.32942	8.06126	8.20063
132	Q13614;A6NN98;C9JEX3;F5H545	Myotubularin-related protein 2	MTMR2	0.178282	-0.0385766	-0.216858	no	no	4.6031e-74	1634300000	9	8	5	6	6	6	8	7	5	5	5	5	7	6	16.5	73.38	643	12	11	10	11	12	11	12.8	11.4	12.3	12.3	14.5	14.5	8.24827	8.03302	7.84029	8.2566	7.97771	7.93225	8.40771	8.19926	7.98884	8.25988
4411	Q15438;Q15438-2;B7Z1T4;A8MWB4;O43739;O43739-2;C9J324;C9JG04	Cytohesin-1	CYTH1	0.177938	0.0542724	-0.123666	no	no	2.4113e-09	371570000	3	2	3	3	3	3	3	2	2	2	2	2	2	2	11.6	46.412	398	4	2	2	3	3	3	11.6	11.6	11.6	11.6	11.6	8.8	7.89012	7.69485	7.449	7.7415	7.50876	7.3594	7.53569	7.28427	7.17863	7.72831
2241	O75953;H0YH04;Q5T657	DnaJ homolog subfamily B member 5	DNAJB5	0.177922	0.118013	-0.059909	no	no	9.2909e-09	399130000	3	3	2	1	3	2	2	2	2	1	3	2	2	2	8	39.133	348	5	1	3	6	4	3	7.8	4.3	8	7.8	7.8	7.8	7.69688	7.53209	7.19623	7.491	7.22081	7.15673	8.34268	8.14876	7.89917	7.58001
4059	Q04446;E9PGM4;F5H378	1,4-alpha-glucan-branching enzyme	GBE1	0.177825	-0.27023	-0.448055	no	no	1.5122e-277	33672000000	29	29	21	23	23	24	27	22	21	23	23	24	27	22	42.3	80.473	702	99	99	87	87	104	83	33.9	34.9	34.9	38.6	42.3	35.3	9.69197	9.45641	9.3138	9.71435	9.41918	9.40737	9.76644	9.53888	9.37692	9.64421
4670	Q5T280;E7ESY7	Uncharacterized protein C9orf114	C9orf114	0.177773	0.392364	0.214592	no	no	7.6963e-24	85845000	5	5	2	2	2	1	3	1	2	2	2	1	3	1	15.7	42.008	376	4	4	4	3	5	3	3.7	6.1	6.9	3.7	10.1	3.7	6.93859	6.74064	6.50217	7.24366	6.98034	6.90132	7.21259	6.9978	6.80381	6.83051
6387	Q9NW82;D6RIW8	WD repeat-containing protein 70	WDR70	0.177653	-0.0630888	-0.240742	no	no	7.6662e-38	922150000	5	5	3	3	3	4	5	4	3	3	3	4	5	4	11.6	73.2	654	10	10	8	10	12	9	5.8	5.8	5.8	7.3	11.6	7.3	8.11431	7.92908	7.65493	7.9789	7.71648	7.63548	8.06565	7.85807	7.64545	8.19075
821	B7ZKS7;Q86UV5;Q86UV5-2;Q86UV5-3;Q86UV5-7;Q86UV5-5;Q86UV5-4;Q86UV5-6;E9PJH5;E9PRY5	Ubiquitin carboxyl-terminal hydrolase 48	USP48	0.177468	0.0177091	-0.159758	no	no	1.2745e-81	2505100000	19	19	11	11	11	11	14	13	11	11	11	11	14	13	21.3	120.52	1047	31	28	26	25	31	32	11.1	12.1	12.5	11.8	15	14.4	8.59432	8.39152	8.16613	8.50251	8.23815	8.16143	8.61116	8.43291	8.13833	8.42831
6279	Q9NR12;Q9NR12-2;D6RH06;Q9NR12-4;Q9NR12-6;Q9NR12-5;D6RF83;Q9NR12-3;D6RAN1;H0Y8W6	PDZ and LIM domain protein 7	PDLIM7	0.176754	0.372767	0.196013	no	no	1.0341e-252	30452000000	25	24	20	21	20	20	21	19	20	21	20	20	20	19	72.2	49.844	457	73	66	66	69	67	66	47.3	48.8	51.6	60.2	48.8	47.3	9.69216	9.53663	9.17076	9.69467	9.49272	9.26505	9.74251	9.59115	9.21125	9.67557
1346	E7ERK9;Q9UI10-2;Q9UI10;Q9UI10-3;F5H6W1;F8W8L6	Translation initiation factor eIF-2B subunit delta	EIF2B4	0.176665	0.240708	0.0640424	no	no	1.0883e-69	1637700000	9	9	3	6	5	7	3	7	3	6	5	7	3	7	22.6	59.714	544	4	11	7	8	5	12	8.8	17.1	14.2	18.2	10.1	19.5	8.26138	8.09286	7.76869	8.54268	8.3307	8.1295	8.52144	8.35606	8.02206	8.45706
5018	Q86VP6;Q86VP6-2;H0YH27;Q86VP6-3;H0YGP5;F5H6I6;F8WBB8	Cullin-associated NEDD8-dissociated protein 1	CAND1	0.176441	-0.0576928	-0.234133	no	no	0	30639000000	47	43	38	42	42	39	39	37	34	38	38	35	35	33	39.8	136.37	1230	89	112	104	96	99	96	32.3	35.2	36.3	33.5	33.4	33.6	9.58834	9.39373	9.14607	9.7785	9.52175	9.42815	9.68951	9.50098	9.23626	9.60946
6453	Q9NYU2;Q9NYU2-2;Q9NYU1;F8WCE6;F8WCI2	UDP-glucose:glycoprotein glucosyltransferase 1	UGGT1	0.176062	0.0414468	-0.134615	no	no	0	36905000000	50	50	38	43	43	42	41	39	38	43	43	42	41	39	43.8	177.19	1555	109	123	112	127	128	110	32.2	38.6	40.4	35.6	35.5	35.7	9.74524	9.55274	9.29918	9.69233	9.44036	9.33598	9.83448	9.65405	9.36592	9.85087
4342	Q14814-4;Q14814-5;Q5T9U4;Q14814-6;Q14814;Q14814-2;Q02078;F8W966;Q02078-2;Q02078-5;Q02078-3;Q02078-6;Q02078-4;F8W7V7;Q14814-3;D6RAH2;Q06413;Q06413-2;C9JMZ0;Q06413-3;D6R9J8;D7F7N5;D6RJG6;D6RC63;D6R942;Q05BX2;D6RCM6;D6RG21;D6RB91;D6RJA7;D6RG14;H0YM62;H0YKY6	Myocyte-specific enhancer factor 2D;Myocyte-specific enhancer factor 2A;Myocyte-specific enhancer factor 2C	MEF2D;MEF2A;MEF2C	0.176061	-0.532965	-0.709026	no	no	1.0484e-12	503930000	3	3	2	3	2	3	2	2	2	3	2	3	2	2	6.4	55.113	514	8	9	7	10	10	7	4.3	6.4	4.3	6.4	4.3	4.3	7.72734	7.44581	7.40589	7.90456	7.55143	7.65005	7.94123	7.68337	7.59225	8.01762
2774	O95425;O95425-2;F5H2Q5;F5GY75;F5GXV0	Supervillin	SVIL	0.175889	0.278479	0.102589	no	no	5.3832e-256	3309000000	25	25	20	18	19	17	18	17	20	18	19	17	18	17	15.6	247.74	2214	33	32	33	35	34	34	13.3	11.4	11.9	10.6	11.4	11	8.76794	8.61731	8.23492	8.59794	8.37429	8.20268	8.78932	8.63072	8.27494	8.75007
6864	Q9Y3P9;B7Z2B4;Q9Y3P9-2;Q9Y3P9-3;C9JGR5;Q9Y3P9-4	Rab GTPase-activating protein 1	RABGAP1	0.17562	-0.360533	-0.536152	no	no	3.5281e-231	2873000000	18	17	15	15	16	13	14	13	14	14	15	12	13	12	22.1	121.74	1069	27	28	26	25	28	22	18.5	20.3	19.4	16.9	16.9	17.6	8.5987	8.36864	8.2128	8.62118	8.30944	8.3306	8.75141	8.51254	8.3778	8.82206
5614	Q96GM5;Q96GM5-2;Q6STE5;Q6STE5-2;F8W9D0;F8VZ70;F8VRQ4;F5GY02;F8VUB0;C9JYI7;F8VW95	SWI/SNF-related matrix-associated actin-dependent regulator of chromatin subfamily D member 1;SWI/SNF-related matrix-associated actin-dependent regulator of chromatin subfamily D member 3	SMARCD1;SMARCD3	0.175383	0.0193751	-0.156008	no	no	1.9975e-66	898200000	3	2	2	3	2	3	2	2	2	2	2	2	2	2	10.7	58.232	515	5	5	7	5	4	5	7.4	10.7	7.4	10.7	7.4	7.4	8.24509	8.04395	7.8141	7.99644	7.73027	7.65751	8.49534	8.31283	8.0308	8.10054
6594	Q9UHB9;G3V1U4;F5H5Y3;E7ETK6;Q9UHB9-2;F5H281;Q96K98;B3KUU5	Signal recognition particle 68 kDa protein	SRP68	0.175036	0.0283809	-0.146655	no	no	1.7584e-236	10658000000	24	24	20	21	20	21	20	19	20	21	20	21	20	19	42.3	70.729	627	57	68	66	64	71	72	38.8	40.5	39.2	38.8	38.8	35.1	9.13887	8.94851	8.68899	9.16888	8.9073	8.82447	9.26361	9.10356	8.75243	9.19271
442	O75390;B4DJV2;H0YIC4;H0YH82;F8W4S1;F8W1S4;F8VTT8;F8VPA1;F8VPF9;F8VRI6;F8VR34;F8VWQ5;F8VX68;F8VRP1;F8VX07;F8VZK9;F8W642;F8VU34;F8VVF6;F8W0J2	Citrate synthase, mitochondrial;Citrate synthase	CS	0.174923	0.0294408	-0.145482	no	no	1.2253e-96	39084000000	17	16	17	17	17	17	16	17	16	16	16	16	15	16	27.7	51.712	466	55	54	59	60	58	51	27.7	27.7	27.7	27.7	26.2	27.7	9.77744	9.58882	9.32434	9.8466	9.59717	9.48698	9.76515	9.57917	9.30715	9.80666
1156	D3YTI5;O75394	39S ribosomal protein L33, mitochondrial	MRPL33	0.174884	-0.0542566	-0.229141	no	no	2.8245e-05	540170000	1	1	1	1	1	1	1	1	1	1	1	1	1	1	16.9	7.6581	65	1	3	2	3	3	1	16.9	16.9	16.9	16.9	16.9	16.9	7.66058	7.34274	7.37574	8.11454	7.86094	7.76024	7.7709	7.52238	7.41014	8.04988
5804	Q99805;E9PHW5	Transmembrane 9 superfamily member 2	TM9SF2	0.174841	-0.00848689	-0.183328	no	no	2.8494e-161	6256200000	16	16	13	12	15	13	13	12	13	12	15	13	13	12	29.6	75.775	663	41	43	38	45	40	44	25.5	25.2	29.3	25.2	25.2	22.8	8.97248	8.779	8.52817	9.05269	8.79911	8.69835	9.01699	8.82574	8.56874	8.99546
11	A1L0T0;E9PJS0;C9JNI8;E9PL44	Acetolactate synthase-like protein	ILVBL	0.174811	-0.345737	-0.520548	no	no	5.3371e-98	3254600000	13	13	7	9	6	13	10	6	7	9	6	13	10	6	32	67.867	632	12	16	10	18	15	12	16.1	22	14.6	32	23.7	13.1	8.724	8.48319	8.35303	8.76525	8.47924	8.44866	8.56455	8.31469	8.2055	8.87955
796	Q9UPP1;Q9UPP1-2;Q9UPP1-3;H0Y3N9;B7Z911	Histone lysine demethylase PHF8	PHF8	0.174405	-0.280719	-0.455123	no	no	6.0664e-21	169230000	2	2	2	2	2	1	2	2	2	2	2	1	2	2	2.5	117.86	1060	2	5	4	2	3	5	2.5	2.5	2.5	1.8	2.5	2.5	6.62743	6.39955	6.23837	7.83043	7.48866	7.56665	7.51984	7.23872	7.19794	7.1682
3689	P51991	Heterogeneous nuclear ribonucleoprotein A3	HNRNPA3	0.174292	0.164658	-0.00963389	no	no	0	2074600000	29	4	28	27	27	27	26	27	4	4	4	4	3	4	61.4	39.594	378	12	15	13	11	8	10	59.5	53.7	53.7	59.5	47.9	51.9	8.7694	8.55669	8.35738	8.71528	8.45515	8.3691	8.69227	8.44574	8.32889	8.0548
4880	Q6ZNB6;Q6ZNB6-2	NF-X1-type zinc finger protein NFXL1	NFXL1	0.17412	0.458842	0.284722	no	no	5.8519e-07	132850000	2	2	2	2	2	1	2	2	2	2	2	1	2	2	2.6	101.34	911	3	5	2	3	3	3	2.6	2.6	2.6	0.8	2.6	2.6	7.39561	7.20739	6.94178	7.41379	7.12503	7.10009	7.42183	7.25809	6.9189	7.03141
6764	Q9Y217;F5GYH6;Q9Y217-2;E9PD73	Myotubularin-related protein 6	MTMR6	0.174062	-0.0142124	-0.188274	no	no	4.5815e-161	3771300000	18	18	14	12	11	13	14	10	14	12	11	13	14	10	36.9	71.967	621	29	26	22	23	30	26	27.1	24.3	20.9	25.1	30.1	19.5	8.75949	8.5477	8.346	8.74085	8.46322	8.41509	8.75875	8.51828	8.38735	8.7194
5798	Q99735;D6RBB5	Microsomal glutathione S-transferase 2	MGST2	0.173824	0.0200186	-0.153805	no	no	4.4739e-32	1043400000	2	2	2	2	1	2	2	1	2	2	1	2	2	1	17.7	16.62	147	6	6	4	5	8	2	17.7	17.7	8.2	17.7	17.7	8.2	8.40131	8.21948	7.93545	8.38776	8.1452	8.01916	7.85577	7.67693	7.38408	8.28271
4651	Q5SRE5;F8W973;Q5SRE5-2;E9PET9;F2Z376	Nucleoporin NUP188 homolog	NUP188	0.173783	-0.0529723	-0.226755	no	no	5.8384e-109	3601800000	20	20	14	15	12	15	14	16	14	15	12	15	14	16	13.2	196.04	1749	36	45	36	38	38	39	9.3	10	8	10.5	9.4	11.7	8.74744	8.54953	8.31091	8.63816	8.35286	8.32081	8.68256	8.45889	8.28731	8.79196
4205	Q13322;Q13322-2;Q13322-4;Q13322-3;A8MY80	Growth factor receptor-bound protein 10	GRB10	0.173751	-0.669027	-0.842778	no	no	5.3178e-96	1655400000	11	11	7	9	7	10	8	8	7	9	7	10	8	8	26.9	67.231	594	13	14	14	15	16	14	14.5	24.1	16.7	25.1	22.2	19	8.23764	7.96382	7.90759	8.58494	8.21683	8.34199	8.45817	8.1975	8.11264	8.47198
6798	Q9Y2I8	WD repeat-containing protein 37	WDR37	0.173466	0.222296	0.0488301	no	no	1.0579e-60	935180000	3	3	2	2	3	3	2	2	2	2	3	3	2	2	13	54.665	494	6	7	8	5	7	7	11.3	11.3	13	13	11.3	11.3	8.02922	7.85602	7.54632	8.10836	7.8953	7.69692	8.48568	8.31781	7.99163	7.70055
6860	Q9Y3I0;E9PCW3;E7EQS9;E7EVP9	tRNA-splicing ligase RtcB homolog	C22orf28	0.173424	0.0700272	-0.103397	no	no	1.5022e-279	42391000000	27	27	22	21	23	24	23	22	22	21	23	24	23	22	59.2	55.21	505	76	71	68	88	73	77	50.9	52.7	52.9	57.2	51.1	49.5	9.8431	9.64907	9.39976	9.69725	9.44373	9.34286	9.79849	9.61181	9.34181	9.98412
4022	Q01518-2;Q5T0R9			0.173307	-0.268602	-0.441908	no	no	0	530690000	33	1	31	31	30	31	30	29	1	1	1	1	1	1	63.3	51.83	474	4	4	1	6	5	2	59.9	59.9	60.1	60.5	58.4	58.6	7.86609	7.65437	7.45251	7.71068	7.44256	7.37405	7.4871	7.28267	7.06164	8.44877
2814	O95861;B4DPS5;O95861-2;C9JI50;B4DUS9;A6NF51;F8W1J0;F8VVW8;F8VRY7;F8VZG4	3(2),5-bisphosphate nucleotidase 1	BPNT1	0.17295	-0.180148	-0.353098	no	no	5.9706e-75	4454800000	12	12	9	10	11	10	11	10	9	10	11	10	11	10	56.2	33.392	308	19	21	21	18	19	19	41.6	41.9	52.3	41.9	45.8	45.5	8.81546	8.62456	8.36655	8.84461	8.56598	8.51997	8.88185	8.67944	8.45303	8.87111
5909	Q9BUT1;Q9BUT1-3;Q9BUT1-2;D6RIR6;D6R9U8;D6R9P2;D6RFG2	3-hydroxybutyrate dehydrogenase type 2	BDH2	0.17293	0.0300594	-0.142871	no	no	3.1679e-21	1165500000	5	5	4	4	4	3	3	3	4	4	4	3	3	3	22.4	26.724	245	4	4	3	3	3	3	17.1	17.1	19.6	14.3	13.9	14.3	8.28187	8.10643	7.80346	8.37049	8.1437	7.97986	8.18758	7.98257	7.76308	8.22614
726	H0YBH7;Q96BY9;B7Z307;E5RHW0;E5RFJ9;H0YAN9;H0YAZ1	Store-operated calcium entry-associated regulatory factor	TMEM66	0.172924	0.804703	0.631779	no	no	6.2836e-16	256180000	4	4	3	1	2	2	3	4	3	1	2	2	3	4	15.9	37.768	347	4	3	3	3	5	5	9.5	3.7	7.2	7.2	9.5	15.9	7.6247	7.48952	7.05204	7.49584	7.29168	7.06993	7.59152	7.46873	6.98296	7.64336
3206	P21333;P21333-2;Q5HY54;E9PHF0;E7EWU2;H0Y5C6;H0Y5F3	Filamin-A	FLNA	0.172493	0.250371	0.0778784	no	no	0	41092000000	140	22	131	134	134	124	127	128	22	20	21	18	20	18	69	280.74	2647	85	95	84	73	84	83	67.5	68	68.3	63	65.7	63.8	9.81371	9.65072	9.30916	9.8398	9.63565	9.41387	9.854	9.6877	9.35662	9.79292
5235	Q8NBZ7-2;Q8NBZ7;B3KV61;Q8NBZ7-3;C9JW33;B4E3U7;C9JE50;C9JCB7;C9JFU6;C9J3T9	UDP-glucuronic acid decarboxylase 1	UXS1	0.172472	0.371926	0.199454	no	no	4.3221e-40	1178400000	6	6	4	3	4	4	4	3	4	3	4	4	4	3	21.2	48.151	425	5	5	4	4	5	3	15.1	13.4	14.4	15.1	15.1	15.1	8.44014	8.2686	7.95376	7.89819	7.71644	7.43218	8.37727	8.2079	7.88638	8.3719
3674	P51659;F5HE57;E9PB82;E7EWE5;E7ER27;E7ET17;G5E9S2;E7EPL9	Peroxisomal multifunctional enzyme type 2;(3R)-hydroxyacyl-CoA dehydrogenase;Enoyl-CoA hydratase 2	HSD17B4	0.17194	0.0193019	-0.152638	no	no	2.1735e-220	21508000000	28	28	19	20	20	19	27	17	19	20	20	19	27	17	43.6	79.685	736	43	48	47	47	59	38	34.2	34.2	34.2	31.5	42.1	31.8	9.42755	9.23053	8.98949	9.58653	9.32506	9.24197	9.5924	9.40429	9.13837	9.59037
2189	Q12802-2;Q12802;Q12802-4;H0Y4V5;H0YMW2;A8MYJ1;F5H8M3;E7EWV9;H0YLH1;H0YK18;H0YK84	A-kinase anchor protein 13	AKAP13	0.171822	-0.0779266	-0.249749	no	no	1.4128e-55	575140000	16	16	6	2	9	5	6	5	6	2	9	5	6	5	11.1	307.84	2817	7	4	10	8	8	7	3.4	1.2	5.9	3.9	4.6	3.5	7.99255	7.78842	7.56661	6.68964	6.43311	6.33901	8.18876	7.98738	7.75814	7.93299
6680	Q9UL45	Pallidin	PLDN	0.171817	0.0461968	-0.12562	no	no	4.5808e-13	142530000	1	1	1	1	1	1	1	1	1	1	1	1	1	1	10.5	19.743	172	2	2	1	1	2	2	10.5	10.5	10.5	10.5	10.5	10.5	7.52999	7.30827	7.13188	7.3325	7.10612	6.94127	7.14891	6.97755	6.66221	6.76667
4458	Q16363;Q16363-2;E9PBR9;E5RFQ2;F5H1X4;H0YAQ5;H0Y351;H0YAP9;E9PBW6	Laminin subunit alpha-4	LAMA4	0.171158	-0.434241	-0.605399	no	no	0	26660000000	36	36	30	30	31	28	33	33	30	30	31	28	33	33	25.4	202.52	1823	113	107	107	100	96	105	21.8	21.7	22.9	21	24	23	9.56982	9.33284	9.19363	9.60188	9.32253	9.27802	9.7636	9.51754	9.39962	9.53147
5725	Q96RL7;Q96RL7-2;Q96RL7-4;Q96RL7-3;H0Y7P8;H0YGQ8	Vacuolar protein sorting-associated protein 13A	VPS13A	0.170901	-0.261952	-0.432852	no	no	1.0512e-29	812500000	8	8	5	6	5	5	5	6	5	6	5	5	5	6	2.8	360.27	3174	11	14	11	14	17	13	1.9	2.1	1.8	1.8	1.8	2.2	8.08375	7.82641	7.73414	7.98456	7.65167	7.7132	8.15531	7.90903	7.79161	8.2721
5455	Q92747;B4DLQ7;E9PF58;F8WFD3	Actin-related protein 2/3 complex subunit 1A	ARPC1A	0.170632	0.405165	0.234533	no	no	7.3295e-114	6646800000	13	12	12	12	9	12	13	12	11	11	8	11	12	11	42.4	41.569	370	33	31	23	32	27	25	40.3	40.3	35.9	39.2	42.4	40.3	9.05154	8.87298	8.57925	9.02694	8.81414	8.61507	9.0604	8.92663	8.4838	9.03197
1304	P37840;E7EPV7;P37840-2;D6RA31;P37840-3;Q16143	Alpha-synuclein	SNCA	0.170298	-0.589284	-0.759582	no	no	4.3647e-112	3920500000	9	9	8	8	9	7	8	8	8	8	9	7	8	8	60	14.46	140	13	11	15	10	12	11	53.6	53.6	60	52.1	53.6	53.6	8.95997	8.65539	8.66246	8.65259	8.34694	8.35614	8.95219	8.64329	8.65889	8.41929
3669	P51571;A6NLM8	Translocon-associated protein subunit delta	SSR4	0.170039	0.262625	0.0925863	no	no	1.7891e-63	20604000000	6	6	5	6	6	4	5	6	5	6	6	4	5	6	37	18.998	173	31	37	31	24	28	27	31.2	37	37	20.2	31.2	37	9.5358	9.37027	9.03679	9.45333	9.24291	9.03767	9.61408	9.44409	9.12447	9.51796
3454	P38117;P38117-2	Electron transfer flavoprotein subunit beta	ETFB	0.169751	-0.146395	-0.316146	no	no	3.0939e-98	7881100000	13	13	12	13	11	11	11	10	12	13	11	11	11	10	49.4	27.843	255	26	30	22	24	26	23	48.6	49.4	45.1	45.1	45.1	41.6	9.02102	8.81966	8.59038	9.25127	8.97781	8.9208	9.00514	8.78776	8.60043	9.04108
1067	C9K0J5;Q70E73;Q70E73-6;Q70E73-9;Q70E73-3;Q70E73-4;Q70E73-7;Q70E73-8;Q70E73-2;C9J164;Q70E73-5;C9JLG4;C9J0R8	Ras-associated and pleckstrin homology domains-containing protein 1	RAPH1	0.169541	-0.06226	-0.231801	no	no	2.9197e-75	813870000	7	7	3	4	5	5	3	3	3	4	5	5	3	3	6.8	141.18	1302	7	8	9	7	7	7	3.3	3.8	4.8	5.5	3.6	3.6	8.05227	7.85523	7.61421	8.07159	7.80485	7.73332	8.17076	7.9695	7.73995	8.21384
1813	Q96DM3;F5H2W0;F5H3Y7;B7Z2Y1	Uncharacterized protein C18orf8	C18orf8	0.16939	0.025735	-0.143655	no	no	4.5692e-42	230290000	4	4	3	2	2	3	3	4	3	2	2	3	3	4	7	74.974	657	6	5	3	8	6	9	4.4	4.3	4.3	4.4	4.4	7	7.55654	7.35399	7.12795	7.19515	6.91571	6.87139	7.4221	7.26602	6.90195	7.79038
3754	P55011;P55011-3;G3XAL9	Solute carrier family 12 member 2	SLC12A2	0.169373	-0.596077	-0.76545	no	no	6.5038e-53	1468900000	11	11	9	7	7	5	6	6	9	7	7	5	6	6	14.9	131.45	1212	23	24	23	17	17	20	13	8.9	9.2	7.2	8.1	8.2	8.42029	8.16271	8.07096	8.37033	8.02069	8.11301	8.43583	8.11902	8.15002	8.19695
6469	Q9NZI8;C9JT33;G8JLG2;Q15517;Q2L6G8	Insulin-like growth factor 2 mRNA-binding protein 1	IGF2BP1	0.169166	0.152099	-0.0170666	no	no	6.0395e-127	12907000000	20	17	12	14	14	14	16	15	10	12	11	12	14	12	39.7	63.48	577	35	38	30	30	36	35	25	29.8	27.6	27.4	33.1	28.4	9.29631	9.12457	8.81034	9.38968	9.09996	9.07704	9.3297	9.15452	8.85073	9.34926
2943	P07814;E7EMN0;F5H7I7	Bifunctional glutamate/proline--tRNA ligase;Glutamate--tRNA ligase;Proline--tRNA ligase	EPRS	0.168342	-0.116764	-0.285106	no	no	0	83738000000	72	72	62	60	62	67	69	64	62	60	62	67	69	64	55.6	170.59	1512	238	237	228	240	251	245	50.2	49.3	50.6	52.7	54	52.5	10.0925	9.89149	9.66124	10.09	9.81701	9.75898	10.15	9.95658	9.70568	10.1479
3726	P53618;E9PP73;E9PKQ1;E9PP63	Coatomer subunit beta	COPB1	0.167338	0.0957123	-0.0716254	no	no	0	41443000000	36	36	31	32	33	33	34	31	31	32	33	33	34	31	44.6	107.14	953	123	133	117	132	131	120	41.2	43.1	43.1	44	44	42.4	9.74559	9.55471	9.29662	9.87606	9.63843	9.50077	9.75303	9.57385	9.28201	9.77731
1802	F5H2A9;G3V1M7;P49748;P49748-2;F5GYP4	Very long-chain specific acyl-CoA dehydrogenase, mitochondrial	ACADVL	0.166967	0.87242	0.705453	no	no	5.1075e-183	6953000000	19	19	14	16	15	17	14	12	14	16	15	17	14	12	35.3	72.926	678	23	20	26	20	24	23	24.9	28.2	26	31.9	26.4	21.8	8.99688	8.87348	8.39018	9.03246	8.84505	8.5771	9.03591	8.89496	8.47857	9.00659
5991	Q9BZ67;Q9BZ67-2;B4E2P1;E9PS62;Q9BZ68;E9PRP1;E9PRA3	FERM domain-containing protein 8	FRMD8	0.166753	0.102698	-0.0640551	no	no	2.5954e-22	632960000	7	7	5	5	5	4	5	5	5	5	5	4	5	5	22.2	51.217	464	9	9	8	10	7	9	16.6	16.8	16.8	10.1	16.8	16.8	8.21173	8.03157	7.74263	7.85607	7.5918	7.51488	8.126	7.81349	7.83613	8.03894
4093	Q08211;F5GXA5;Q08211-2	ATP-dependent RNA helicase A	DHX9	0.166684	0.0587284	-0.107956	no	no	0	72766000000	56	56	47	53	50	45	50	48	47	53	50	45	50	48	51	140.96	1270	171	187	165	163	174	164	45.8	48.9	47.3	43	48.2	46	9.98353	9.79515	9.52999	10.116	9.86561	9.75756	10.0516	9.87589	9.57367	10.0255
3223	P22612	cAMP-dependent protein kinase catalytic subunit gamma	PRKACG	0.166538	-0.226878	-0.393416	no	no	1.4006e-35	2493600000	4	1	3	3	4	3	3	3	1	1	1	1	1	1	14.8	40.434	351	5	6	3	5	4	3	14.8	14.8	14.8	14.8	14.8	14.8	8.58255	8.36528	8.17765	8.729	8.42506	8.43088	8.59562	8.30309	8.28589	8.71918
6305	Q9NRX4;Q9NRX4-2	14 kDa phosphohistidine phosphatase	PHPT1	0.166451	-0.53665	-0.703101	no	no	3.8864e-76	8493600000	5	5	5	4	4	3	4	4	5	4	4	3	4	4	54.4	13.832	125	22	26	19	20	20	20	54.4	38.4	38.4	31.2	47.2	38.4	9.11711	8.86343	8.7629	9.09149	8.77463	8.80577	9.263	8.98833	8.93391	9.16643
3007	P10155;Q5LJ99;Q5LJA0;Q5LJ98;G5E9R9;P10155-2;H0Y9N5;D6RE09;D6RDN1	60 kDa SS-A/Ro ribonucleoprotein	TROVE2	0.166096	-0.261832	-0.427928	no	no	3.5604e-116	7791400000	17	17	16	15	14	15	15	15	16	15	14	15	15	15	33.6	60.67	538	40	44	40	41	46	48	31	30.7	28.8	29.6	29.4	28.6	9.14239	8.92609	8.73601	9.16098	8.88289	8.8357	9.01565	8.79217	8.62016	8.95795
6750	Q9UPU5;B7WPF4	Ubiquitin carboxyl-terminal hydrolase 24;Ubiquitin carboxyl-terminal hydrolase	USP24	0.16592	-0.294665	-0.460585	no	no	2.7785e-86	695660000	11	11	9	8	6	7	9	6	9	8	6	7	9	6	5.9	294.36	2620	10	16	11	12	16	10	4.6	4.3	2.7	3.6	4.6	3.7	7.89806	7.67538	7.50135	8.0477	7.75808	7.73495	8.08824	7.85261	7.71023	8.04743
1778	Q9NW08;F5H1E6;F8VRE2;F8VRU2;F8VRS3	DNA-directed RNA polymerase III subunit RPC2;DNA-directed RNA polymerase	POLR3B	0.165913	-0.0514416	-0.217355	no	no	6.3039e-38	409540000	8	8	3	4	4	3	5	6	3	4	4	3	5	6	10.5	127.78	1133	7	10	8	9	12	10	4.3	5	5	4.3	6.4	9	7.78168	7.57556	7.35902	7.70819	7.40444	7.40987	7.84354	7.61181	7.46004	7.82634
270	B1AKJ5;O43847-2;O43847;F5H6R2;G3V1R5;F5H7V1;E9PHF8;H0Y5G9	Nardilysin	NRD1	0.165558	0.122774	-0.0427844	no	no	2.7723e-156	5527000000	26	26	20	23	18	17	21	20	20	23	18	17	21	20	22.6	139.41	1219	44	48	37	38	50	47	17.1	19.7	15.3	15.4	18.3	18.1	8.91498	8.72164	8.47043	9.0545	8.82063	8.67398	8.89444	8.72474	8.40423	8.85474
311	Q96BY6;B3FL70;Q96BY6-2;E7EV00;F8WE73	Dedicator of cytokinesis protein 10	DOCK10;DOCK10.2	0.165514	0.414153	0.248639	no	no	3.1678e-217	2115500000	16	16	10	10	9	11	12	14	10	10	9	11	12	14	11.7	249.53	2186	24	21	23	31	34	34	6.6	6.8	6.9	8.5	9.3	10.9	8.4186	8.23659	7.95308	8.36395	8.12953	7.98422	8.49089	8.28876	8.06157	8.58415
3499	P42345;F5GYA6;B4DZD5;B1AKP8	Serine/threonine-protein kinase mTOR	MTOR	0.165423	-0.130535	-0.295958	no	no	3.2807e-172	4228700000	24	24	16	15	19	13	16	15	16	15	19	13	16	15	11.9	288.89	2549	27	30	26	27	34	27	8.4	8.2	10.7	7.6	9.4	8.2	8.83513	8.63062	8.4098	8.70931	8.41926	8.39702	8.95754	8.75895	8.52218	8.77037
4110	Q09161;F2Z2T1	Nuclear cap-binding protein subunit 1	NCBP1	0.165234	-0.131194	-0.296428	no	no	7.4315e-133	10646000000	16	16	9	13	12	11	13	12	9	13	12	11	13	12	25.6	91.838	790	32	35	33	32	31	32	13.7	19.4	19.2	17	21	18.5	9.0443	8.84432	8.61133	9.18665	8.90724	8.86285	9.28925	9.08952	8.85587	9.32054
6836	Q9Y394;Q9Y394-2;H0YJ66;F8W9Q4;H0YJR8;H0YJE4	Dehydrogenase/reductase SDR family member 7	DHRS7	0.164814	0.264339	0.0995253	no	no	6.846e-37	650230000	4	4	3	4	4	3	4	3	3	4	4	3	4	3	16.2	38.298	339	6	9	6	8	4	6	12.4	16.2	16.2	12.4	16.2	12.4	8.00286	7.84235	7.49277	8.16619	7.97629	7.71548	8.1344	7.95974	7.65442	8.01874
2753	O95236;O95236-2	Apolipoprotein L3	APOL3	0.164754	-0.0309717	-0.195726	no	no	2.9809e-20	344970000	2	2	2	2	1	2	2	1	2	2	1	2	2	1	5.2	44.278	402	4	5	4	5	4	3	5.2	5.2	5.2	5.2	5.2	5.2	7.815	7.626	7.3626	7.71824	7.39485	7.43848	7.73679	7.52213	7.32785	7.87584
1307	Q14643;E7EPX7;E7EVP7;Q14643-2;Q14643-6;Q14643-5;Q14643-7;Q14643-8;G5E9P1;Q14643-3;Q14643-4;B7ZMI3	Inositol 1,4,5-trisphosphate receptor type 1	ITPR1	0.164433	0.243165	0.0787313	no	no	2.0129e-54	261800000	14	4	8	9	9	8	10	11	2	2	2	2	2	4	4.4	313.94	2758	3	4	2	2	7	7	2.5	2.9	3.1	2.7	3.4	3.6	7.2999	7.07962	6.89957	7.15758	6.8517	6.86131	6.9331	6.81492	6.31012	7.01498
5234	Q8NBX0;E9PEA8	Saccharopine dehydrogenase-like oxidoreductase	SCCPDH	0.163986	-0.138421	-0.302407	no	no	3.8384e-147	4582500000	9	9	7	9	6	6	7	8	7	9	6	6	7	8	40.6	47.151	429	13	18	10	11	14	13	31	40.6	28.9	29.1	31	34	8.78868	8.60375	8.32873	8.99986	8.73046	8.66472	8.96237	8.77299	8.51068	8.73613
3029	P11137;P11137-3;P11137-2;E7EV03;A8MZ31	Microtubule-associated protein 2	MAP2	0.163807	-1.34716	-1.51096	no	no	5.3347e-82	541670000	10	6	7	7	8	7	5	7	3	4	4	3	3	3	9.6	199.52	1827	3	6	3	4	4	4	6.5	7.9	8.1	6.8	5.1	6.5	7.83682	7.43759	7.61582	7.9128	7.49375	7.70448	7.99035	7.56166	7.78786	7.82002
2341	O14497;O14497-2;O14497-3;H0Y488;Q96SM7;H0YEW5;H0YCU6	AT-rich interactive domain-containing protein 1A	ARID1A	0.16354	-0.0092038	-0.172744	no	no	5.3086e-34	988710000	8	8	6	6	5	4	5	5	6	6	5	4	5	5	5	242.04	2285	11	9	10	6	9	7	3.8	3.6	3.2	2.6	3.5	3.5	8.27226	8.09503	7.79737	8.22994	8.00907	7.83051	8.35085	8.16438	7.89372	8.11441
4012	Q01081;Q701P4;Q8WU68;Q8WU68-3;Q71RF1;Q8WU68-2;F8WDB0	Splicing factor U2AF 35 kDa subunit;Splicing factor U2AF 26 kDa subunit	U2AF1;U2AF1L4	0.163438	-0.0255958	-0.189034	no	no	5.797e-126	11745000000	9	9	8	8	9	8	8	8	8	8	9	8	8	8	37.5	27.872	240	40	40	35	37	35	38	33.8	33.8	37.5	33.8	33.8	33.8	9.1854	8.98623	8.75106	9.22492	8.97011	8.87214	9.30391	9.11059	8.85928	9.31545
2713	O94851-4;O94851-6;O94851;O94851-3;O94851-5;O94851-2;F5H8E8;E9PKI3;E9PNC3;E9PL42	Protein-methionine sulfoxide oxidase MICAL2	MICAL2	0.163287	0.779546	0.61626	no	no	2.1127e-116	2180800000	12	11	9	7	6	10	8	10	9	7	6	10	8	9	18.3	111.65	976	13	13	10	14	10	13	15.2	12.3	11.4	16.1	13.9	16.1	8.52767	8.37029	8.01051	8.57742	8.3511	8.18608	8.5347	8.41039	7.93077	8.54461
6692	Q9ULP9;Q9ULP9-2	TBC1 domain family member 24	TBC1D24	0.16318	-0.116232	-0.279412	no	no	2.8656e-69	815040000	5	5	3	4	3	3	3	4	3	4	3	3	3	4	11.4	62.919	559	5	4	5	5	5	7	8.6	9.8	8.6	8.6	8.6	10.2	8.14507	7.95746	7.69009	7.985	7.71174	7.65429	8.05281	7.84464	7.63348	8.12901
1250	Q9NRR4;E7EMP9;Q9NRR4-2;H0Y2N2;Q9NRR4-3;E9PE71	Ribonuclease 3	DROSHA	0.162854	0.402931	0.240077	no	no	5.7278e-23	182430000	3	3	1	1	2	2	2	1	1	1	2	2	2	1	3.2	159.31	1374	2	2	2	3	3	2	1.5	1.5	2.5	2.5	2.1	1.5	7.49217	7.39333	6.8009	7.31355	7.07693	6.93686	7.01364	6.85456	6.50039	7.59343
219	A8MXB7;Q9Y343;Q9Y343-2	Sorting nexin-24	SNX24	0.162852	0.369147	0.206295	no	no	5.8819e-17	140320000	2	2	2	2	2	2	2	2	2	2	2	2	2	2	12.4	23.728	202	3	5	5	6	5	5	12.4	12.4	12.4	12.4	12.4	12.4	7.01816	6.86519	6.49074	7.19997	6.99176	6.78078	7.40169	7.23264	6.91011	7.51434
4753	Q63HN8-4;Q63HN8;Q63HN8-5;Q63HN8-6	E3 ubiquitin-protein ligase RNF213	RNF213	0.162677	-0.397255	-0.559932	no	no	0	7242700000	51	51	34	38	32	34	37	33	34	38	32	34	37	33	13.4	596.48	5256	60	74	51	52	67	61	9.2	10.3	8.7	8.9	10.1	9.3	8.92946	8.69128	8.55494	9.12639	8.79592	8.85296	9.01557	8.77706	8.6415	9.05538
5427	Q92538	Golgi-specific brefeldin A-resistance guanine nucleotide exchange factor 1	GBF1	0.162268	0.00212242	-0.160146	no	no	0	7982400000	31	31	17	22	21	20	20	21	17	22	21	20	20	21	24.4	206.44	1859	34	48	47	35	46	54	13.3	15.6	18.6	15.6	15.6	16.1	8.86247	8.67523	8.4068	9.1821	8.93462	8.82	9.20282	9.00625	8.76397	8.90476
6689	Q9ULJ7;E9PDW0	Ankyrin repeat domain-containing protein 50	ANKRD50	0.162068	0.193041	0.030973	no	no	0	3252500000	15	15	12	11	11	11	13	9	12	11	11	11	13	9	16.8	155.86	1429	28	28	29	24	33	26	13.2	12.9	12.7	13.6	15	10.1	8.68554	8.50235	8.2223	8.63417	8.40758	8.24326	8.82148	8.63754	8.35965	8.52688
2432	O15294;O15294-3;O15294-2;O15294-4;C9JZL3	UDP-N-acetylglucosamine--peptide N-acetylglucosaminyltransferase 110 kDa subunit	OGT	0.162012	0.221522	0.05951	no	no	9.3269e-119	2473600000	19	19	12	13	13	9	13	16	12	13	13	9	13	16	28.1	116.92	1046	20	21	18	22	18	22	18.9	21.5	19.8	13.7	20.8	24.1	8.60164	8.42781	8.11995	8.66017	8.43252	8.2708	8.69159	8.5059	8.23305	8.55721
6891	Q9Y4P1-2;Q9Y4P1;Q9Y4P1-6;F5H7P2;Q9Y4P1-4;F8WD71;C9J5D3;Q9Y4P1-3;C9JQ72;C9JIK8;C9J3C0;C9JVD5;F2Z2K8;H0Y2Y0;C9J1C1	Cysteine protease ATG4B	ATG4B	0.162007	0.136553	-0.025454	no	no	7.0864e-100	2443800000	8	8	5	6	6	5	5	6	5	6	6	5	5	6	24.4	52.529	468	20	15	21	16	18	21	13.7	17.1	17.3	13.7	13.7	17.3	8.55266	8.36408	8.09947	8.47176	8.23535	8.09482	8.77021	8.58969	8.30181	8.42938
4323	Q14571;Q14571-2	Inositol 1,4,5-trisphosphate receptor type 2	ITPR2	0.161894	0.357973	0.196079	no	no	8.822e-184	3407300000	32	22	20	24	19	18	21	23	14	17	12	12	13	16	15	308.06	2701	24	29	19	23	20	29	10.5	12	9.3	8.8	10.8	10.5	8.74342	8.5857	8.22706	8.67843	8.46015	8.27508	8.74211	8.59851	8.19167	8.85222
4135	Q12805;Q12805-3;Q12805-4;Q12805-2;B4DW75;E9PGL6;Q580Q6;C9JPZ9;C9J4J8;C9JQX7;C9JUM4	EGF-containing fibulin-like extracellular matrix protein 1	EFEMP1	0.161766	1.24996	1.08819	no	no	7.243e-209	9977700000	18	18	12	13	14	14	11	13	12	13	14	14	11	13	48.3	54.64	493	23	33	32	27	28	27	35.3	36.3	35.3	41.6	28.6	38.9	9.17878	9.09244	8.43476	9.10619	8.98539	8.49152	9.29938	9.19745	8.61991	9.30675
6892	Q9Y4R8;E7EUD6	Telomere length regulation protein TEL2 homolog	TELO2	0.161533	0.520542	0.359009	no	no	4.1334e-45	1000800000	8	8	4	3	2	1	4	4	4	3	2	1	4	4	14.8	91.746	837	6	4	4	2	4	5	7.3	7	4.4	1.9	6.8	8.5	8.26635	8.11912	7.72499	8.12428	7.94613	7.65123	8.29879	8.17348	7.69787	8.11484
1294	Q6P996;E7EPL4;E7EMH5;Q86XE2;H0Y6N6;Q6P996-2;Q6P474;Q6XYB5	Pyridoxal-dependent decarboxylase domain-containing protein 1	PDXDC1	0.161517	-0.224411	-0.385928	no	no	1.1319e-138	2547200000	18	18	12	14	11	9	13	14	12	14	11	9	13	14	30.2	86.706	788	22	24	23	22	26	30	18.7	24.6	18.9	14.1	20.7	24.7	8.54818	8.33876	8.13091	8.64351	8.37625	8.30587	8.56697	8.34169	8.17412	8.54908
2018	Q13627;Q13627-2;Q13627-5;F8W9I9;Q13627-4;Q13627-3;Q9Y463;Q9Y463-3;Q9Y463-2;F8WAP0;E7EMI5	Dual specificity tyrosine-phosphorylation-regulated kinase 1A	DYRK1A	0.161499	-0.138683	-0.300182	no	no	1.4581e-18	468540000	4	4	4	4	4	3	3	4	4	4	4	3	3	4	6	85.583	763	7	8	5	9	9	8	6	6	6	5.1	3.8	6	7.86751	7.66184	7.44409	7.82624	7.49866	7.55024	8.00212	7.80959	7.55619	7.94195
5300	Q8TAD4;Q9BVY8;Q8TAD4-2;Q9BY48;H0Y957;B7ZM89;D6REM2	Zinc transporter 5	SLC30A5	0.161373	0.153029	-0.00834348	no	no	1.8503e-37	197550000	4	4	4	3	3	2	3	2	4	3	3	2	3	2	11.5	84.046	765	5	5	4	2	5	2	11.5	8.4	8.4	4.4	8.4	6.8	7.5594	7.38023	7.08838	7.5475	7.24716	7.24576	7.68451	7.46135	7.28854	7.25665
1159	Q13557-11;Q13557-4;Q13557-6;Q13557-3;Q13557;D6R938;Q13557-5;Q13557-10;Q13557-9;Q13557-12;Q13557-8;E9PF82;E9PBG7;H0Y9C2;H0Y9J2;Q9UQM7-2;Q9UQM7;E7EQE4;E9PBE8;D6RHX9	Calcium/calmodulin-dependent protein kinase type II subunit delta	CAMK2D	0.161318	-0.164529	-0.325847	no	no	9.3836e-157	5712100000	13	10	13	12	13	13	12	13	10	9	10	10	9	10	35.7	59.151	524	23	24	27	28	25	24	35.7	34.2	35.7	35.7	34.4	35.7	8.92063	8.71179	8.50241	8.86541	8.59145	8.5355	8.99044	8.79709	8.5459	9.1427
2730	O94973;O94973-2;C9J1S3;O94973-3;E7ESQ4;E9PJJ7;E9PR62;E7EVC3;E9PBJ2;H0YEG0;H0YDE9;E9PQP4;E9PPY8;E9PNC4	AP-2 complex subunit alpha-2	AP2A2	0.161005	-0.0366088	-0.197614	no	no	0	11189000000	34	23	27	28	23	24	28	24	19	19	16	14	20	17	47.5	103.96	939	31	38	27	25	31	30	39.8	41.5	36	35.5	41.7	36.8	9.23114	9.04127	8.7803	9.15842	8.92581	8.77611	9.34278	9.17918	8.83954	9.06848
2378	O14920;O14920-2;B4E0U4;B3KRB7;G3V105;E5RGW5;O14920-3;E5RFG5;E5RIW0;E5RGA0;E5RJH2	Inhibitor of nuclear factor kappa-B kinase subunit beta	IKBKB	0.160996	-0.264356	-0.425352	no	no	1.4635e-79	444770000	10	8	5	5	3	6	7	8	3	4	2	4	6	6	18	86.563	756	6	9	5	6	9	7	11	10.7	6.3	12.7	13.9	13.1	7.56674	7.34185	7.1733	7.90061	7.62046	7.57765	7.78249	7.5466	7.4048	7.88865
2889	P04899;B3KTZ0;P04899-2;B4DYA0;B4E2X5;F5H4U5;F5GZL8	Guanine nucleotide-binding protein G(i) subunit alpha-2	GNAI2	0.160728	-0.169027	-0.329755	no	no	3.8686e-263	77629000000	19	11	18	17	17	18	18	17	10	9	9	10	10	9	57.5	40.45	355	51	52	45	56	54	53	57.2	52.7	52.7	53	53	52.7	10.0676	9.86368	9.64121	10.0414	9.76443	9.71498	10.1194	9.92256	9.68096	10.1482
1850	F5H4R0;O60447	Ecotropic viral integration site 5 protein homolog	EVI5	0.160699	0.0457989	-0.1149	no	no	1.2864e-23	95783000	1	1	1	1	1	1	1	1	1	1	1	1	1	1	2.7	94.132	821	1	3	2	3	2	2	2.7	2.7	2.7	2.7	2.7	2.7	6.95611	6.71183	6.58977	7.20981	6.88731	6.92922	7.35944	7.10278	7.00898	7.23487
4583	Q53GS7;Q53GS7-2	Nucleoporin GLE1	GLE1	0.160543	-0.0783658	-0.238909	no	no	8.8022e-13	94212000	1	1	1	1	1	1	1	1	1	1	1	1	1	1	3.3	79.835	698	3	2	1	1	2	5	3.3	3.3	3.3	3.3	3.3	3.3	7.2528	7.07711	6.77485	6.92718	6.65674	6.59323	7.12011	6.93469	6.66109	6.51928
4544	Q495W5;Q495W5-2	Alpha-(1,3)-fucosyltransferase 11	FUT11	0.160027	-0.145612	-0.30564	no	no	1.6544e-22	373650000	3	3	3	2	2	2	1	3	3	2	2	2	1	3	10.6	55.815	492	4	2	2	2	1	3	10.6	7.1	6.9	7.1	3.5	10.6	7.87088	7.44314	7.66782	7.60334	7.31078	7.29367	7.73961	7.52593	7.32913	7.93883
5085	Q8IWE4	DCN1-like protein 3	DCUN1D3	0.159675	0.468392	0.308716	no	no	2.5356e-17	1286500000	2	2	2	2	1	1	1	1	2	2	1	1	1	1	8.2	34.291	304	6	8	5	8	7	6	8.2	8.2	5.3	5.3	5.3	5.3	8.32552	8.15987	7.82675	8.10061	7.9009	7.66719	8.44176	8.30679	7.86847	8.45843
1875	Q14562;F5H658;F5H521	ATP-dependent RNA helicase DHX8	DHX8	0.15963	-0.127369	-0.286999	no	no	1.0317e-64	775980000	13	12	8	8	5	8	9	7	7	7	4	7	8	6	12.4	139.31	1220	14	12	8	12	13	6	8	8.3	4.5	7.4	8.7	6	8.31122	8.08113	7.92538	8.00152	7.69369	7.70714	7.70947	7.4869	7.3126	8.38987
3129	P16435;H0Y4R2;E7EVY7;F5H468;E7EMD0;E7EPN3;E7EWU0;C9JU80	NADPH--cytochrome P450 reductase	POR	0.159613	0.0383323	-0.121281	no	no	2.809e-183	10325000000	21	21	19	16	18	17	16	14	19	16	18	17	16	14	32.9	76.689	677	44	45	44	54	53	41	31	27.9	26	29	26.7	24.1	9.20371	8.99638	8.78303	9.16894	8.92275	8.80514	9.29557	9.09458	8.8643	9.30415
4078	Q06210;Q06210-2	Glucosamine--fructose-6-phosphate aminotransferase [isomerizing] 1	GFPT1	0.159587	0.00021651	-0.159371	no	no	1.1803e-259	21077000000	29	25	23	24	23	26	26	24	19	20	19	22	22	20	49.2	78.806	699	61	60	58	71	67	56	40.2	40.6	37.8	44.6	46.4	40.3	9.51636	9.33177	9.05576	9.58398	9.32603	9.23512	9.53377	9.34649	9.0782	9.53286
4175	Q13107;Q13107-2;C9JNU9;C9IY91	Ubiquitin carboxyl-terminal hydrolase 4	USP4	0.159586	0.0614356	-0.09815	no	no	4.5746e-98	1845700000	13	12	10	10	10	11	12	10	9	9	9	10	11	9	16.1	108.56	963	14	19	15	17	21	17	11.7	10.6	11.2	13.6	15.2	11	8.4035	8.20047	7.9757	8.46385	8.1839	8.14067	8.46165	8.27105	8.01216	8.58473
3438	P36578;E7EWF1;B4DMJ2;B4DP82	60S ribosomal protein L4	RPL4	0.159022	0.179874	0.0208526	no	no	4.4223e-300	147720000000	37	37	34	33	31	35	35	36	34	33	31	35	35	36	59.3	47.697	427	162	168	154	161	156	164	57.1	58.8	55.5	57.6	57.6	59	10.3361	10.1606	9.85785	10.4103	10.1741	10.0329	10.368	10.1965	9.88162	10.2615
5268	Q8NFF5;Q8NFF5-2;Q5T196;Q8NFF5-3;Q8NFF5-5;Q5T191;Q5T190	FAD synthase;Molybdenum cofactor biosynthesis protein-like region;FAD synthase region	FLAD1	0.158936	0.173017	0.0140813	no	no	4.6771e-115	432390000	8	2	4	7	8	4	6	6	0	2	2	0	2	2	22.1	65.265	587	0	3	2	0	3	4	14.5	21	22.1	14.3	19.6	19.6	NaN	NaN	NaN	7.83502	7.60508	7.44897	7.73797	7.53762	7.30565	NaN
5240	Q8NCA5;Q8NCA5-2;E9PH82;B4DT23;C9J3G8	Protein FAM98A	FAM98A	0.158788	0.186213	0.027425	no	no	3.6271e-88	2220500000	10	9	7	8	7	7	6	8	6	7	6	6	5	7	26.8	55.4	519	9	14	11	9	11	14	21.6	22.2	21.6	18.7	17	20.4	8.24564	8.07518	7.75702	8.59289	8.35847	8.21317	8.44772	8.26839	7.97699	8.44297
2591	O75083;A8MVA9;O75083-3;B4DY05;D6RD66	WD repeat-containing protein 1	WDR1	0.158734	0.0237242	-0.135009	no	no	0	178330000000	35	35	34	34	34	33	33	32	34	34	34	33	33	32	68	66.193	606	302	296	295	277	307	283	66.8	68	68	66.8	66.8	65.5	10.4444	10.2598	9.98379	10.4645	10.2179	10.1013	10.4977	10.3028	10.0559	10.3775
4260	Q13769;F8WCP5;C9JXG5;C9JCL9;F5GZF3;C9JXU6	THO complex subunit 5 homolog	THOC5	0.158367	-0.0255958	-0.183963	no	no	1.0071e-86	1822700000	12	12	5	8	6	9	9	10	5	8	6	9	9	10	26.2	78.507	683	6	13	9	14	13	18	10.5	17.1	12.4	19.3	17.9	19.8	8.19579	7.95228	7.82847	8.46389	8.1807	8.14429	8.40314	8.2183	7.943	8.57681
1906	Q9H4A6;F5H7W9;D6REM1	Golgi phosphoprotein 3	GOLPH3	0.158308	0.0197553	-0.138552	no	no	1.4097e-54	606060000	8	6	4	6	5	4	5	3	2	4	3	2	3	2	29.2	33.81	298	4	7	5	5	5	4	13.4	26.2	18.5	13.4	15.4	11.1	7.88698	7.64112	7.52273	8.1712	8.03778	7.59355	8.07291	7.8501	7.6764	8.07251
6507	Q9P258	Protein RCC2	RCC2	0.157614	-0.0267293	-0.184344	no	no	2.8851e-161	11619000000	21	21	17	17	17	15	18	20	17	17	17	15	18	20	50.4	56.084	522	48	45	42	36	45	42	41.8	40.4	40.4	38.9	43.7	50.4	9.23109	9.03399	8.7932	9.28461	9.00638	8.95954	9.24834	9.04293	8.82452	9.17583
6105	Q9H3U1;Q9H3U1-2;Q9H3U1-3	Protein unc-45 homolog A	UNC45A	0.157596	-0.013355	-0.170951	no	no	0	11067000000	33	33	26	25	23	25	29	27	26	25	23	25	29	27	38.9	103.08	944	54	60	51	64	59	61	31.6	33.2	29.1	32.4	37	35.5	9.19855	9.00022	8.76275	9.20314	8.94084	8.85959	9.26477	9.07668	8.8107	9.24391
4683	Q5T5X7	BEN domain-containing protein 3	BEND3	0.157572	0.397258	0.239685	no	no	3.7112e-16	2481400000	2	2	2	2	1	2	2	2	2	2	1	2	2	2	5.1	94.474	828	2	2	1	2	3	2	5.1	5.1	3.1	5.1	5.1	5.1	8.50221	8.30812	8.059	8.55474	8.32015	8.17522	8.76172	8.56005	8.33163	8.67695
1903	Q2M1Z3;F5H7Q1;C9J652	Rho GTPase-activating protein 31	ARHGAP31	0.157492	-0.146786	-0.304277	no	no	1.4116e-26	390420000	7	7	3	3	3	3	3	5	3	3	3	3	3	5	5.7	156.98	1444	7	6	6	4	7	8	3.3	3.3	3.3	3.5	3.5	4.7	7.70375	7.482	7.30565	7.50524	7.2072	7.20121	7.76457	7.52524	7.39161	7.65238
4762	Q68CQ4	Digestive organ expansion factor homolog	DIEXF	0.15743	0.55222	0.39479	no	no	4.7967e-38	1277800000	5	5	3	2	4	3	3	4	3	2	4	3	3	4	9.4	87.054	756	7	8	9	8	8	10	6.2	3.8	7.9	6.2	6.2	7.7	8.35322	8.22477	7.76152	8.15054	7.97375	7.67477	8.37468	8.23832	7.80519	8.42285
4286	Q14146	Unhealthy ribosome biogenesis protein 2 homolog	URB2	0.157296	0.132499	-0.0247965	no	no	1.6607e-15	152090000	4	4	2	3	3	0	1	1	2	3	3	0	1	1	4	170.54	1524	3	3	3	0	2	2	2.4	3.3	3.2	0	1.7	1.7	7.49177	7.35449	6.92475	7.66235	7.4004	7.31838	7.6761	7.47492	7.24519	NaN
72	A6NFN2;Q8IZP0;F8WA56;Q8IZP0-9;Q8IZP0-6;Q8IZP0-5;Q8IZP0-3;Q8IZP0-4;Q8IZP0-2;F8WA55;Q8IZP0-7;F5H1G9;Q8IZP0-8;Q8IZP0-10;B4DQ58;F8WAL6	Abl interactor 1	ABI1	0.157243	0.0438095	-0.113434	no	no	5.2825e-53	2474100000	9	7	8	8	6	7	6	7	7	6	5	5	5	5	22	55.259	509	15	14	13	9	10	10	18.9	22	15.7	18.9	15.7	18.9	8.63459	8.44954	8.17484	8.71083	8.45137	8.36382	8.59534	8.40092	8.15272	8.47265
5780	Q99570;D6RJ98;D6RBB7;D6RAC3	Phosphoinositide 3-kinase regulatory subunit 4	PIK3R4	0.157111	-0.0881416	-0.245252	no	no	2.1967e-143	2744800000	17	17	12	14	13	11	15	13	12	14	13	11	15	13	17.1	153.1	1358	21	26	20	21	23	22	10.5	14.1	13.2	12.4	14.7	15.8	8.57432	8.36263	8.16065	8.64961	8.37552	8.31986	8.64796	8.47243	8.1697	8.69965
5596	Q96F44;Q96F44-3;Q13410;Q4VAN1;Q6AZZ1;Q96F44-2;F5H5T8	E3 ubiquitin-protein ligase TRIM11;Butyrophilin subfamily 1 member A1;E3 ubiquitin-protein ligase TRIM68	TRIM11;BTN1A1;TRIM68	0.156574	-0.0536476	-0.210222	no	no	2.4987e-29	68662000	2	1	2	2	2	2	2	2	1	1	1	1	1	1	7.1	52.774	468	2	2	1	2	2	1	7.1	7.1	7.1	7.1	7.1	7.1	7.06089	6.81657	6.6946	7.01853	6.81066	6.59881	7.27365	7.02061	6.91863	6.89714
2482	O43390-2			0.156423	-0.177344	-0.333767	no	no	0	338580000	32	2	31	30	30	30	31	30	1	2	1	1	2	1	53.1	71.214	636	2	3	2	3	2	2	52.8	51.3	52.8	50.9	53.1	52.8	7.64615	7.40649	7.27363	7.72678	7.40627	7.4444	7.72483	7.43037	7.41714	7.66277
1767	F8WCP6;Q7Z4S6-4;Q7Z4S6;Q7Z4S6-2;F5H219;F8W762;Q7Z4S6-3;F5H0C3;H0YHT2;H0YIM6;F5H0V8;H0YI78;H0YIM7;H0YHG9	Kinesin-like protein KIF21A	KIF21A	0.156371	0.352566	0.196194	no	no	2.8042e-19	1053900000	5	4	3	3	4	2	2	4	2	3	4	2	2	4	5.3	187.46	1675	3	5	9	5	6	7	3.5	3.7	4.7	2.9	2.9	4.7	8.09342	7.92517	7.60018	8.00342	7.78571	7.59922	8.42597	8.23611	7.97517	8.37665
5939	Q9BW83;Q9BW83-2;E9PE51;F5GZ09;H0Y6C7;F6SIY6;F6X9B7	Intraflagellar transport protein 27 homolog	IFT27	0.156303	-0.407733	-0.564037	no	no	1.2633e-28	940090000	5	5	5	5	5	2	4	5	5	5	5	2	4	5	33.9	20.48	186	8	8	8	4	8	8	33.9	33.9	33.9	13.4	25.3	33.9	8.15818	7.91975	7.78401	8.16593	7.88184	7.84725	8.19064	7.90796	7.87044	7.89712
4301	Q14204;H0YJ21	Cytoplasmic dynein 1 heavy chain 1	DYNC1H1	0.156067	-0.343919	-0.499986	no	no	0	288260000000	236	236	194	211	200	206	210	205	194	211	200	206	210	205	52.9	532.4	4646	690	751	686	742	723	715	46.2	48.4	47.5	48.2	48.6	47.6	10.6096	10.3806	10.2221	10.6617	10.3623	10.3591	10.7009	10.4815	10.2994	10.6235
6466	Q9NZD8;Q9NZD8-2;H0YKB0;H0YMB7;H0YKM6;H0YLT5;H0YLW1;H0YLD7;H0YML6;H0YMN9	Maspardin	SPG21	0.155958	-0.414893	-0.570851	no	no	6.3668e-27	1413100000	7	7	5	4	4	4	3	4	5	4	4	4	3	4	28.6	34.96	308	8	7	8	8	5	4	17.2	15.9	11.4	13.6	9.1	11.4	8.33252	8.10003	7.95008	8.19709	7.87272	7.91822	8.38675	8.14048	8.02309	8.63085
2522	O43865;O43865-2;Q96HN2;Q96HN2-2;F8W7N8;H0Y8B3;D7UEQ7;B4DIZ5;D9N155	Putative adenosylhomocysteinase 2;Putative adenosylhomocysteinase 3;Adenosylhomocysteinase	AHCYL1;AHCYL2	0.155456	-0.0142124	-0.169668	no	no	1.4967e-49	2854300000	11	11	7	6	5	6	6	8	7	6	5	6	6	8	27.4	58.951	530	17	16	15	12	10	19	17.5	18.5	14.5	18.5	18.5	20.4	8.65289	8.45799	8.21112	8.66006	8.38365	8.3329	8.66096	8.45535	8.23747	8.64416
4035	Q02218;E9PCR7;E9PDF2;Q02218-2;F5H801;E9PFG7;Q96DD3;C9J4G7;Q9ULD0;Q9ULD0-2;Q9ULD0-3	2-oxoglutarate dehydrogenase, mitochondrial	OGDH	0.155454	-0.291014	-0.446468	no	no	0	27369000000	41	41	37	32	29	33	36	31	37	32	29	33	36	31	51.7	115.93	1023	95	89	79	91	96	89	50.7	44.4	41.7	40.6	48.2	41.7	9.59402	9.37293	9.19493	9.56049	9.26411	9.25477	9.65621	9.45332	9.22819	9.67035
6943	Q9Y673;Q9Y673-2;B4DR67	Dolichyl-phosphate beta-glucosyltransferase	ALG5	0.155436	-0.0343565	-0.189793	no	no	2.5598e-46	1177300000	8	8	7	7	6	4	7	5	7	7	6	4	7	5	34	36.946	324	14	14	13	13	15	11	31.8	31.8	29	17	31.8	21.3	8.32695	8.13818	7.8741	8.34795	8.08586	8.00415	8.27275	8.06236	7.85699	8.16035
375	B4DDK9;Q10469	Alpha-1,6-mannosyl-glycoprotein 2-beta-N-acetylglucosaminyltransferase	MGAT2	0.155243	-0.00748264	-0.162726	no	no	4.2462e-57	1215200000	9	9	5	6	5	6	4	5	5	6	5	6	4	5	25.4	52.297	453	15	14	11	14	11	10	15.7	17.4	15.7	18.3	11.7	14.8	8.35708	8.16794	7.90495	8.35559	8.09047	8.0154	8.30107	8.10673	7.85834	8.4081
2984	P09493-3;D9YZV2;D9YZV3;Q6ZN40;H0YL52;D9YZV8;B7Z596;F5H7S3;Q9Y427;P09493-2;P09493-5;H0YNC7;H0YKP3;H0YKX5;H0YL42;H0YL80;H0YK20;H0YKZ6	Tropomyosin alpha-1 chain	TPM1	0.155193	0.542227	0.387034	no	no	0	3145300000	30	1	27	25	28	20	21	22	1	1	1	1	1	1	67.6	32.876	284	7	4	5	4	4	5	60.2	55.3	67.6	45.4	50	49.6	8.87423	8.74104	8.29601	8.5412	8.38646	8.01795	8.87463	8.71074	8.37201	8.63689
0	A0AVF1;C9J2N7;B7Z6R6;B7Z2T3;Q96CU4;E7ES78;F8WEZ4;F8W724;E7ET00	Tetratricopeptide repeat protein 26	TTC26	0.154813	0.343128	0.188315	no	no	6.1261e-20	199220000	5	5	2	4	2	3	2	2	2	4	2	3	2	2	12.5	64.177	554	2	6	2	3	2	2	9	10.6	6	10.8	9	6	7.30279	7.1533	6.76699	7.82933	7.6034	7.43743	7.47088	7.30931	6.96315	7.46424
4432	Q15696;Q15695	U2 small nuclear ribonucleoprotein auxiliary factor 35 kDa subunit-related protein 2;U2 small nuclear ribonucleoprotein auxiliary factor 35 kDa subunit-related protein 1	ZRSR2;ZRSR1	0.154595	-0.0792927	-0.233888	no	no	1.5796e-06	141280000	3	3	2	2	2	2	3	2	2	2	2	2	3	2	10.4	58.044	482	7	4	6	4	8	7	3.5	3.5	3.5	3.5	10.4	3.5	7.56423	7.36667	7.12707	7.2769	7.00924	6.93971	7.44643	7.24057	7.02333	6.70559
4359	Q15018	BRISC complex subunit Abro1	FAM175B	0.154314	0.177115	0.0228007	no	no	5.8502e-66	1141900000	7	7	4	5	4	4	4	3	4	5	4	4	4	3	32	46.9	415	10	11	11	9	12	9	17.3	20.2	21	17.3	16.1	13.3	8.22999	8.04501	7.77014	8.24709	8.01557	7.86326	8.28021	8.10237	7.80659	8.28092
1735	F5GYQ1;P61421;F8WEN9	V-type proton ATPase subunit d 1	ATP6V0D1	0.15425	-0.0911243	-0.245374	no	no	1.1473e-120	6632300000	13	13	12	12	11	13	10	11	12	12	11	13	10	11	42.1	44.659	392	35	35	36	38	34	34	40.1	38.8	37	42.1	33.9	37	8.95208	8.74982	8.52298	9.03375	8.76437	8.6986	9.09423	8.88955	8.66918	9.04183
735	F8WA39;Q13613;B7Z3D5;Q13613-2;H0YDX3;F6X5S1;Q8NEC6;E9PIH9	Myotubularin-related protein 1	MTMR1	0.154102	-0.223299	-0.377401	no	no	5.5206e-38	727280000	8	8	5	5	5	6	5	7	5	5	5	6	5	7	16.3	75.717	673	11	9	9	13	10	14	9.5	9.5	9.5	13.5	9.5	12.3	8.01523	7.80684	7.59628	7.84701	7.55183	7.54005	8.20701	7.98193	7.81385	8.07896
1642	E9PN11;P08134;Q5JR08;E9PQH6;Q5JR05;C9JX21;C9JNR4;Q5JR07;Q5JR06;C9JRM1;C9J1T2;E9PLA2	Rho-related GTP-binding protein RhoC	RHOC;RHOA	0.154016	-0.0643311	-0.218347	no	no	5.3051e-92	3490700000	8	1	7	8	8	8	8	7	1	1	1	1	1	1	31.9	25.485	229	7	7	6	8	6	6	27.9	31.9	31.9	31.9	31.9	27.9	8.74287	8.54732	8.30222	8.73284	8.47062	8.3892	8.78916	8.58379	8.36526	8.69556
2734	O95070;F8W9A1;A6NGW1;C9JST7;E9PIZ0;E9PP02;E9PS11	Protein YIF1A	YIF1A	0.153898	0.563924	0.410026	no	no	2.6539e-53	1326300000	5	5	5	5	5	5	4	5	5	5	5	5	4	5	24.9	32.011	293	10	15	15	15	11	13	24.9	24.9	24.9	24.9	19.8	24.9	8.16729	8.03379	7.59002	8.26494	8.05763	7.84422	8.51166	8.3602	7.98065	8.28643
1765	Q9Y6R4;F5H538;Q9Y6R4-2;F5H0A4;F5H4R1;F5H1X6	Mitogen-activated protein kinase kinase kinase 4	MAP3K4	0.153884	-0.0528839	-0.206768	no	no	4.1007e-36	224890000	6	6	1	4	1	3	4	4	1	4	1	3	4	4	4.4	181.68	1608	2	4	1	4	4	5	0.9	3.3	1	2.9	3.5	3.5	7.31037	7.15439	6.78995	7.35528	7.12222	6.97365	7.02057	6.82035	6.58803	7.88446
510	Q6VN20;B4DQH9;B4DID0;B3KP49;E9PD26;B4DHL9	Ran-binding protein 10	RANBP10	0.153701	0.18894	0.0352391	no	no	7.3535e-33	248940000	5	4	3	2	2	4	4	2	3	2	2	3	3	2	12.1	67.256	620	4	3	3	4	5	2	7.3	5	4.5	9.8	9.8	4.4	7.4764	7.29121	7.01687	7.25406	7.00389	6.89543	7.3999	7.19976	6.9672	7.79284
5883	Q9BTE1;E7EWW8	Dynactin subunit 5	DCTN5	0.153475	0.0581576	-0.0953169	no	no	9.1071e-12	217540000	4	4	3	2	3	3	3	3	3	2	3	3	3	3	20.9	20.126	182	4	3	3	4	3	4	17	11.5	15.4	17	17	15.4	7.4494	7.16744	7.12843	7.15764	6.88271	6.82881	7.49143	7.32795	6.98793	7.28062
323	Q9UKM7;B3KQC5;H0YG20;H0YGV7;H0YIU0	Endoplasmic reticulum mannosyl-oligosaccharide 1,2-alpha-mannosidase	MAN1B1	0.153445	0.120357	-0.0330883	no	no	3.2154e-49	1675100000	7	6	5	6	5	5	4	4	4	5	4	4	3	3	13.7	79.579	699	10	9	7	9	8	9	9.7	11.3	9.7	9.7	7.3	7.3	8.48776	8.27862	8.07004	8.46253	8.21611	8.09902	8.36858	8.139	7.98198	8.55471
4334	Q14697;Q14697-2;F5H6X6;E9PKU7;H0YFL4;E9PNH1;E9PRF8;Q14697-3	Neutral alpha-glucosidase AB	GANAB	0.152978	0.0560411	-0.0969364	no	no	0	124110000000	46	46	40	43	43	43	44	41	40	43	43	43	44	41	51.7	106.87	944	195	201	181	204	200	186	44.3	47.8	49.2	47	48.6	46.8	10.2216	10.0102	9.80735	10.342	10.0705	10.0092	10.3579	10.1488	9.94009	10.2433
5818	Q9BPW8;F8WCR5;C9JDV8	Protein NipSnap homolog 1	NIPSNAP1	0.152863	-0.545178	-0.698041	no	no	1.0248e-94	5662800000	9	7	8	8	8	9	9	8	6	6	6	7	7	6	35.6	33.31	284	21	17	18	18	21	18	33.1	33.1	33.1	35.6	35.6	33.1	8.86367	8.60085	8.52073	8.92157	8.57995	8.65765	8.98561	8.71695	8.6496	8.94853
1397	O75179;O75179-2;E7EUV3;H0YM23;G5E964;E7EWI7;O75179-4;H0YLQ3;O75179-3;C9JRC1;B5MEE3;O75179-5;E7ETA2;H0YMS3;B3KU50;E7ET58	Ankyrin repeat domain-containing protein 17	ANKRD17	0.152537	0.0794018	-0.0731348	no	no	3.8061e-71	779870000	13	10	6	8	6	4	10	8	5	6	4	3	7	7	9	274.25	2603	8	8	5	5	10	9	4.5	6.6	5.2	3.3	7.7	6.3	8.16026	7.97895	7.69338	8.00758	7.76478	7.63933	8.1648	8.02292	7.60995	7.61968
6884	Q9Y4G8	Rap guanine nucleotide exchange factor 2	RAPGEF2	0.152226	-0.314998	-0.467224	no	no	6.6904e-23	144350000	4	3	3	3	2	3	2	3	2	2	1	2	1	2	3.9	167.41	1499	2	2	1	2	1	2	2.5	2.5	1.7	3.1	1.7	2.5	7.39298	7.13596	7.04297	7.27862	7.04242	6.90133	7.40926	7.21764	6.96163	7.43588
3379	P32119;A6NIW5;A8K0C0	Peroxiredoxin-2	PRDX2	0.152035	-0.434562	-0.586597	no	no	1.4071e-208	23420000000	15	14	13	14	15	12	13	14	12	13	14	11	12	13	70.7	21.892	198	57	64	60	56	53	63	70.7	67.2	70.7	67.2	70.7	70.7	9.54412	9.3032	9.1733	9.57645	9.27407	9.27676	9.61508	9.32	9.30801	9.53334
4332	Q14694-2;Q14694-3;Q14694	Ubiquitin carboxyl-terminal hydrolase 10	USP10	0.151944	0.217843	0.0658988	no	no	3.3858e-133	4885600000	15	15	12	10	7	7	9	9	12	10	7	7	9	9	27.8	92.596	846	21	20	16	18	18	19	24	18.3	12.4	12.2	14.1	14.7	8.83579	8.64066	8.39442	8.93865	8.68114	8.58925	8.87467	8.70675	8.38072	8.78899
6828	Q9Y305-4;Q9Y305;Q9Y305-2;Q9Y305-3;C9J7L8	Acyl-coenzyme A thioesterase 9, mitochondrial	ACOT9	0.151932	-0.0301242	-0.182057	no	no	2.3872e-165	13358000000	17	17	14	16	15	15	14	14	14	16	15	15	14	14	46	50.85	448	42	45	44	48	47	46	36.2	43.8	40.2	38.4	36.2	36.6	9.27114	9.08322	8.81682	9.32901	9.07118	8.97997	9.37508	9.18344	8.92745	9.38032
830	Q7Z460;F8WA11;Q7Z460-3;F5GWS0;B7ZLX3;E7EUA5;Q7Z460-2;C9JW97;F5GWM7;F5H2E2;H0Y5T1;F5H436;C9J151;C9JP76	CLIP-associating protein 1	CLASP1	0.151775	-0.0150693	-0.166844	no	no	2.93e-166	5286800000	20	19	15	10	16	15	16	16	15	10	16	14	15	15	17	169.45	1538	34	26	27	37	32	30	14.4	8.9	15.7	11.4	13.2	13	8.9878	8.88298	8.31913	8.78508	8.5424	8.41662	9.12538	8.96159	8.62257	8.98499
2786	O95573;F5GWH2;F5H062;C9JC11	Long-chain-fatty-acid--CoA ligase 3	ACSL3	0.151191	-0.0924781	-0.243669	no	no	3.2769e-216	13997000000	25	23	25	23	23	21	23	20	23	21	21	19	21	18	47.2	80.419	720	46	51	49	45	51	43	47.2	44.3	45	39.9	43.5	40.1	9.35187	9.09503	9.00165	9.32168	9.03463	9.00621	9.39492	9.1495	9.03011	9.37814
2618	O75319;C9JYA6;C9JGC8;O75319-2	RNA/RNP complex-1-interacting phosphatase	DUSP11	0.15078	0.0653552	-0.0854246	no	no	1.503e-28	403010000	2	2	2	2	2	2	2	2	2	2	2	2	2	2	10.3	38.938	330	3	3	2	2	3	2	10.3	10.3	10.3	10.3	10.3	10.3	7.80651	7.60958	7.36827	7.75818	7.47771	7.43556	7.83235	7.65137	7.36483	7.94996
4811	Q6P158;Q6P158-2;F8WAZ3;F8W801;Q6P158-3	Putative ATP-dependent RNA helicase DHX57	DHX57	0.150705	0.347693	0.196988	no	no	1.609e-52	2073800000	12	11	9	5	7	8	8	9	8	5	7	8	7	9	9.6	155.6	1386	16	15	13	17	15	16	7.5	4.2	5.8	7	6.4	7.5	8.46531	8.31125	7.94045	8.46412	8.22484	8.09107	8.41009	8.24898	7.90137	8.5609
1265	E7ENN3;E7EQI5;Q8NF91;E9PEL9;Q8NF91-4;Q8NF91-2;Q8NF91-8;H0Y325;H0Y326;Q8NF91-3;F5GXQ9;Q8NF91-9;F8WAI0;Q5JV20;Q8NF91-7;Q8NF91-6;Q8NF91-5;F5GXQ8;F5H4Q0;F5H422;G3V5D3	Nesprin-1	SYNE1	0.150601	-0.0126402	-0.163241	no	no	1.3944e-126	2659800000	19	18	9	9	14	10	14	15	8	8	13	9	13	14	3.7	966.64	8409	15	11	20	13	17	20	1.6	1.6	2.6	1.8	2.8	2.9	8.54868	8.33666	8.13558	8.57146	8.26228	8.27846	8.80483	8.58313	8.40668	8.47069
2413	O15143;F8WCG3;C9J6C8;C9JFG9;C9JQM8;C9JEY1;C9J4Z7;C9K057;C9JBJ7;C9JTT6;F8WEB3;C9JM51;F8VXW2	Actin-related protein 2/3 complex subunit 1B	ARPC1B	0.150136	-0.0833836	-0.23352	no	no	0	34783000000	19	18	18	17	18	18	19	17	17	16	17	17	18	16	66.7	40.949	372	87	88	84	93	84	80	59.1	56.5	64	59.1	66.7	57	9.72886	9.53556	9.28427	9.75528	9.48892	9.41659	9.76163	9.56509	9.32274	9.70949
3908	P62879;E7EP32;C9JXA5;C9JIS1;C9JZN1;B3KPU1	Guanine nucleotide-binding protein G(I)/G(S)/G(T) subunit beta-2	GNB2	0.149498	-0.190552	-0.34005	no	no	6.7564e-222	7089200000	13	5	12	12	12	13	12	11	5	5	5	5	5	4	55	37.331	340	21	13	14	15	17	15	48.2	48.2	48.2	55	48.2	38.8	9.07853	8.85428	8.68416	8.93731	8.65861	8.61273	9.21072	8.98872	8.81299	8.97781
4339	Q14764;E9PHL5	Major vault protein	MVP	0.149225	-0.012211	-0.161436	no	no	0	98007000000	45	45	40	40	39	42	42	38	40	40	39	42	42	38	51.7	99.326	893	147	140	133	147	145	143	48.5	46.2	45.2	51	48.5	45.4	10.1354	9.94994	9.6764	10.1626	9.90012	9.81921	10.2487	10.0622	9.7917	10.1174
1468	Q53H12;E9PC15;E9PG39	Acylglycerol kinase, mitochondrial	AGK	0.149046	-0.344601	-0.493647	no	no	2.7347e-110	3864200000	9	9	8	8	6	8	9	8	8	8	6	8	9	8	33.2	47.137	422	15	12	14	20	17	19	31.3	31.3	25.8	31.3	33.2	29.1	8.67577	8.45002	8.28362	8.79521	8.52197	8.46449	8.72094	8.44595	8.3922	8.86434
3500	P42356;P42356-2;A4QPH2;A4QPH2-3;A4QPH2-2;A8MTF1;Q8N8J0	Phosphatidylinositol 4-kinase alpha	PI4KA	0.149016	-0.395172	-0.544189	no	no	7.98e-76	1290900000	11	11	9	7	7	7	7	7	9	7	7	7	7	7	8.2	231.32	2044	17	12	16	14	16	17	6.2	4.2	4.3	4.9	4.6	4.6	8.23872	7.98459	7.8851	8.03703	7.71813	7.75315	8.35239	8.13133	7.95329	8.36966
4657	Q5SWX8;E9PFR7;Q5SWX8-2;C9JPX4;Q5SWX8-3	Protein odr-4 homolog	ODR4;C1orf27	0.14891	0.167685	0.0187756	no	no	2.6238e-44	503080000	7	7	4	4	4	5	4	5	4	4	4	5	4	5	24	51.103	454	5	5	4	8	5	5	14.3	13	16.1	18.7	16.1	15.6	7.94349	7.69953	7.57677	7.78401	7.56442	7.38268	7.68855	7.53694	7.15791	8.14395
6947	Q9Y696;F5H1F8	Chloride intracellular channel protein 4	CLIC4	0.148906	-0.342896	-0.491802	no	no	0	73901000000	19	19	18	18	18	17	17	16	18	18	18	17	17	16	74.7	28.772	253	92	94	93	90	90	82	68.4	74.7	74.7	68.4	68.4	68	10.0692	9.85189	9.66428	10.0213	9.72532	9.71507	10.1166	9.8908	9.72458	10.2283
5045	Q86Y79;C9J7Z1	Probable peptidyl-tRNA hydrolase	PTRH1	0.148899	0.24378	0.0948802	no	no	1.2955e-19	467630000	5	5	3	5	2	2	2	3	3	5	2	2	2	3	31.8	22.936	214	3	5	2	3	2	3	20.6	31.8	20.6	15.9	22.9	20.6	7.66601	7.49561	7.17731	8.21806	8.01439	7.79137	7.59721	7.42531	7.11156	7.83028
5902	Q9BUJ2;Q9BUJ2-2;B7Z4B8;Q9BUJ2-4;Q9BUJ2-3;E9PE99	Heterogeneous nuclear ribonucleoprotein U-like protein 1	HNRNPUL1	0.148851	-0.213254	-0.362105	no	no	2.1938e-220	9585000000	22	22	19	18	18	19	15	13	19	18	18	19	15	13	29.2	95.737	856	50	46	41	46	42	41	27.2	26.1	24.2	26.2	22.1	20	9.2257	9.01845	8.80493	9.23664	8.95673	8.9134	9.22837	9.01326	8.8201	9.18935
4866	Q6V0I7;Q6V0I7-3;Q6V0I7-2	Protocadherin Fat 4	FAT4	0.148755	-0.381616	-0.53037	no	no	3.496e-35	149190000	5	5	5	2	3	2	4	3	5	2	3	2	4	3	1.5	542.68	4981	4	3	3	2	4	3	1.5	0.6	1	0.7	1.1	1	7.45883	7.22295	7.0811	7.19822	6.80718	6.97171	7.41353	7.15223	7.06878	7.39573
4352	Q14CX7;Q14CX7-2;H0YHR9;F8W1S0	N-alpha-acetyltransferase 25, NatB auxiliary subunit	NAA25	0.148666	0.124063	-0.0246034	no	no	4.1632e-134	3128800000	19	19	12	14	13	14	15	14	12	14	13	14	15	14	22.8	112.29	972	18	24	19	24	24	23	14.4	15.1	15.9	17.5	17.7	16.5	8.56699	8.37313	8.12333	8.64505	8.37829	8.30679	8.80173	8.59654	8.37751	8.84919
6551	Q9UBS8;A8MTW5;B7Z229;B7Z3J5;E7EP22;D6RA38;D6RBU3;D6RDU6;D6R996;D6RAS4;D6RBK4;D6R988	E3 ubiquitin-protein ligase RNF14	RNF14	0.148628	0.28877	0.140142	no	no	2.9081e-14	293430000	4	4	3	3	3	2	3	4	3	3	3	2	3	4	7.4	53.837	474	6	6	6	6	5	5	4.9	7.4	7.4	4.9	7.4	7.4	7.6588	7.46994	7.20615	7.8939	7.68687	7.47274	7.78234	7.59028	7.33552	7.66276
205	O15371;A8MWD3;B4DVY1;B0QYA5;B0QYA3;B0QYA4;B0QYA7;B0QYA6;B0QYA8	Eukaryotic translation initiation factor 3 subunit D	EIF3D	0.148607	0.273047	0.12444	no	no	1.0067e-215	24618000000	24	24	17	20	18	19	20	19	17	20	18	19	20	19	52.4	63.972	548	53	55	53	57	56	44	39.1	46.4	38.3	42.3	40.7	40.7	9.5936	9.43391	9.08167	9.55121	9.32434	9.16071	9.60901	9.45924	9.07394	9.66564
3955	P78527;P78527-2;E7EUY0;F5GX40;H0YG84	DNA-dependent protein kinase catalytic subunit	PRKDC	0.148566	-0.144568	-0.293135	no	no	0	131490000000	167	167	129	144	137	136	141	145	129	144	137	136	141	145	42.8	469.08	4128	347	392	362	361	386	381	34.2	38	36.3	35.7	36.8	37.9	10.2291	10.0159	9.8178	10.3572	10.0758	10.0357	10.3242	10.1368	9.86894	10.2864
5778	Q99567;B4DP20	Nuclear pore complex protein Nup88	NUP88	0.148469	-0.0251707	-0.173639	no	no	3.6947e-130	6645300000	14	14	11	11	12	10	13	12	11	11	12	10	13	12	25.9	83.541	741	41	38	32	44	44	35	20.2	19.7	20.1	18.8	24.7	21.1	8.94789	8.76183	8.49007	8.82463	8.56658	8.47589	9.09902	8.91987	8.62801	9.08916
6224	Q9HCK8;Q9HCK8-2;H0YJG4	Chromodomain-helicase-DNA-binding protein 8	CHD8	0.148241	-0.0521377	-0.200379	no	no	1.5938e-55	881600000	11	10	7	6	5	7	7	8	6	5	4	6	6	7	6.9	290.52	2581	9	8	5	12	8	11	5	4.2	4.2	5	5.1	4.3	8.06971	7.86	7.65287	7.97672	7.69274	7.65794	8.21043	7.99594	7.80123	8.41197
2572	O60763;O60763-2;F5H4X1;F5GYR8;F5GZ76;H0Y7C0	General vesicular transport factor p115	USO1	0.148147	-0.139208	-0.287354	no	no	1.0088e-304	22326000000	24	24	22	22	22	20	19	19	22	22	22	20	19	19	36.4	107.89	962	81	82	70	64	66	68	32.6	32.6	32.6	29.5	30	29.4	9.53588	9.32214	9.12548	9.515	9.24264	9.1833	9.6607	9.4457	9.25232	9.44949
2079	G3V1W8;P37023;E7EN07	Serine/threonine-protein kinase receptor R3	ACVRL1	0.148142	-0.388906	-0.537047	no	no	4.5938e-49	753080000	6	6	4	5	4	4	4	3	4	5	4	4	4	3	27.1	57.504	517	5	7	5	5	6	4	16.4	24.4	16.4	20.1	16.4	14.1	8.1451	7.89463	7.78683	8.03567	7.67824	7.78457	8.21002	7.95249	7.86066	8.05258
3474	P40926;E9PDB2;G3XAL0	Malate dehydrogenase, mitochondrial;Malate dehydrogenase	MDH2	0.147833	-0.236217	-0.38405	no	no	4.8836e-188	46514000000	19	19	17	19	18	18	18	19	17	19	18	18	18	19	67.8	35.503	338	80	81	79	90	77	88	61.5	67.8	63.6	65.7	65.7	67.8	9.86972	9.65731	9.45722	9.94737	9.67018	9.62112	9.86179	9.64978	9.44864	9.80824
563	Q68DH5;B4DTZ7	LMBR1 domain-containing protein 2	LMBRD2	0.147738	0.209295	0.0615561	no	no	5.6052e-32	274780000	2	2	2	2	2	2	2	2	2	2	2	2	2	2	4.9	81.171	695	3	3	3	3	3	3	4.9	4.9	4.9	4.9	4.9	4.9	7.70149	7.52696	7.22123	7.29962	7.05484	6.93394	7.87551	7.71002	7.37641	7.84615
2882	P04275;A8MZH7	von Willebrand factor;von Willebrand antigen 2	VWF	0.147569	-0.210264	-0.357834	no	no	0	115810000000	102	102	88	93	96	92	91	91	88	93	96	92	91	91	47.4	309.26	2813	274	292	267	269	277	265	39.8	41.6	44.4	42.7	41.8	41.3	10.2316	10.0152	9.82523	10.2736	10.0007	9.94257	10.3487	10.1329	9.94159	10.2089
609	E7EPF0;Q9NP64;B4DY38;Q9NP64-2	Nucleolar protein of 40 kDa	ZCCHC17	0.147121	0.24157	0.0944489	no	no	1.3081e-11	373680000	1	1	1	1	1	1	1	1	1	1	1	1	1	1	6.2	27.994	243	2	2	1	2	2	2	6.2	6.2	6.2	6.2	6.2	6.2	7.80055	7.64321	7.28332	7.5126	7.27602	7.13586	7.9685	7.805	7.46506	7.87089
4180	Q13131-2;Q13131;Q96E92;P54646	5-AMP-activated protein kinase catalytic subunit alpha-1	PRKAA1	0.147062	-0.0783365	-0.225398	no	no	7.3096e-110	5273900000	11	11	9	10	9	10	10	11	9	10	9	10	10	11	27.7	65.522	574	18	24	19	22	27	21	23.2	26.1	23.2	26.1	26.1	27.7	8.71605	8.51191	8.2901	8.84773	8.57985	8.5108	8.72308	8.53363	8.27152	9.05865
4172	Q13085-4;Q13085;Q13085-2;Q13085-3;D3YTK0;A8MYL5	Acetyl-CoA carboxylase 1;Biotin carboxylase	ACACA	0.147017	-0.252537	-0.399554	no	no	0	9739600000	69	31	52	54	54	55	56	56	24	22	24	24	26	23	37.2	270	2383	60	59	52	53	60	52	29	30.4	29.3	29.8	30.5	30.7	9.17056	8.94377	8.77994	9.16403	8.86015	8.86582	9.22147	8.99723	8.82707	9.18093
2539	O60306;H0YH15;H0YLN9	Intron-binding protein aquarius	AQR	0.14697	-0.0716254	-0.218595	no	no	6.0971e-199	5453800000	20	20	15	16	14	14	13	14	15	16	14	14	13	14	14.7	171.29	1485	44	43	42	49	45	46	11.1	11.9	10.4	10.5	9.4	10.6	8.91862	8.71209	8.49665	8.88952	8.62493	8.54871	8.97193	8.77859	8.5274	8.95474
3069	P13667;C9JMN9	Protein disulfide-isomerase A4	PDIA4	0.146622	0.302831	0.156209	no	no	0	130740000000	52	51	46	46	46	44	48	44	45	45	45	43	47	43	58.1	72.932	645	244	238	245	235	237	246	55.3	56.6	56.9	56.3	58.1	56.6	10.3294	10.1667	9.82418	10.3345	10.1348	9.9009	10.3565	10.182	9.87643	10.2675
2937	P07384;E9PRM1;E9PQB3;E9PLQ6;E9PSA6;E9PJA6;E9PMC6;E9PLC9;E9PJJ3;E9PLX0;E9PIA9	Calpain-1 catalytic subunit	CAPN1	0.146493	-0.232906	-0.379399	no	no	2.7992e-227	22523000000	34	28	26	31	26	29	27	29	22	26	21	23	22	24	49	81.889	714	48	55	47	45	43	49	42.4	45.2	40.5	45	41.7	42.7	9.47274	9.2571	9.06536	9.60425	9.33361	9.27056	9.6627	9.46833	9.22	9.52863
1568	Q7Z5K2-3;E9PH12;Q7Z5K2-2;Q7Z5K2;Q8WVX6	Wings apart-like protein homolog	WAPAL	0.14605	0.093217	-0.0528332	no	no	1.2414e-157	1889000000	10	10	9	9	5	10	9	8	9	9	5	10	9	8	9.9	142.52	1275	28	29	17	32	26	23	9.2	9.2	5.6	9.9	9.2	9.1	8.54503	8.34974	8.10394	8.36169	8.09437	8.02407	8.39403	8.20041	7.95002	8.6162
1879	Q13724;F5H6D0;C9J8D4;C9JDQ1;B8ZZE2	Mannosyl-oligosaccharide glucosidase	MOGS	0.146019	0.13481	-0.0112093	no	no	3.5619e-220	11183000000	22	22	17	15	17	18	17	19	17	15	17	18	17	19	34.2	91.916	837	41	37	34	43	39	40	28	25.6	30.2	28.8	28.8	30.6	9.21882	9.04139	8.74436	9.22645	8.97423	8.87044	9.27047	9.09649	8.7891	9.20115
3424	P35658-5;P35658-3;P35658;P35658-4;P35658-2;Q5JUP9;F5H131;H0YF36;H0Y837;B7ZAV2;E9PKD2;B4DZN4	Nuclear pore complex protein Nup214	NUP214	0.145968	-0.0626743	-0.208642	no	no	1.4304e-242	5642200000	20	20	16	15	16	15	17	14	16	15	16	15	17	14	15.9	215.4	2093	29	30	26	22	25	27	12.3	11.9	13	12.3	13.6	10.8	8.9491	8.72307	8.55735	8.93503	8.65229	8.61491	8.96434	8.75896	8.54047	8.8962
3242	P23467-3;F8VU56;P23467;F5H3G6;P23467-2;F8VSD5;Q6ZR19;F5H0Y4;H0YHE8;Q9UBF0;Q9UBT5	Receptor-type tyrosine-protein phosphatase beta	PTPRB	0.145959	0.0245459	-0.121413	no	no	1.031e-238	6198000000	34	33	21	24	22	19	20	21	21	24	21	19	20	21	19.1	249.14	2215	40	47	41	35	41	42	12.4	14.5	13.4	11.2	13.2	12.6	8.9061	8.71507	8.45741	9.04731	8.7998	8.6852	9.15467	8.89973	8.80208	8.88835
513	P24468;Q3KQR7;B4DQJ2;P10589;P10588;B4DQE4	COUP transcription factor 2;COUP transcription factor 1	NR2F2;NR2F1	0.14544	0.295216	0.149777	no	no	1.8857e-42	999540000	8	8	3	5	6	4	5	4	3	5	6	4	5	4	25.1	45.571	414	6	11	8	9	6	8	9.4	15	19.8	9.2	17.4	11.8	7.83428	7.70311	7.2504	8.37138	8.09195	8.04763	8.34009	8.19056	7.80442	8.00966
285	Q8N2K1;B1AMF0;A8MYC7;Q8N2K1-2;D6RB84;A6NGS0;D6RC43;D6RA15;B1AMF1	Ubiquitin-conjugating enzyme E2 J2	UBE2J2	0.145429	0.267983	0.122554	no	no	4.6843e-27	506700000	5	5	5	3	4	3	4	3	5	3	4	3	4	3	21.2	28.898	259	8	5	6	4	6	5	21.2	21.2	21.2	21.2	21.2	21.2	8.10078	7.91763	7.63741	7.73215	7.48893	7.36442	8.01766	7.83052	7.56184	7.69081
566	Q13530;F5GY47;B4DUE9;Q5H936	Serine incorporator 3	SERINC3	0.145155	-0.0581087	-0.203264	no	no	1.2625e-38	924980000	4	4	2	3	3	2	2	3	2	3	3	2	2	3	8.2	52.58	473	5	7	9	3	6	7	5.7	8.2	8.2	6.6	5.7	5.7	8.07251	7.85054	7.67472	8.28997	8.03383	7.93885	8.24462	8.0484	7.80515	8.14715
5745	Q96SK2;Q96SK2-2;Q96SK2-3	Transmembrane protein 209	TMEM209	0.144941	-0.316377	-0.461319	no	no	1.7211e-32	581770000	2	2	2	1	1	1	1	1	2	1	1	1	1	1	7.1	62.921	561	4	3	3	2	4	3	7.1	3.6	3.6	3.6	3.6	3.6	7.88781	7.65894	7.5002	7.86174	7.53869	7.58165	7.98726	7.75537	7.60396	7.97554
427	E9PBS3;B4DIM2;Q6ZS17;Q6ZS17-2;H0Y442	Protein FAM65A	FAM65A	0.144629	-0.00891703	-0.153546	no	no	2.451e-93	3325500000	16	16	9	10	10	9	12	10	9	10	10	9	12	10	16.1	134.2	1239	20	17	22	17	24	18	9	10.1	10.3	9.1	11	10.8	8.58032	8.37834	8.15079	8.6774	8.42336	8.32366	8.79806	8.59542	8.36961	8.66874
5903	Q9BUK6;Q9BUK6-2;Q9BUK6-3;Q9BUK6-7;B4DF47;Q9BUK6-5;Q9BUK6-6;B4DHK3;Q9BUK6-4	Protein misato homolog 1	MSTO1	0.144464	-0.273456	-0.41792	no	no	9.7801e-45	988140000	10	9	6	5	6	5	7	5	5	5	6	5	6	5	25.1	61.835	570	13	12	14	10	14	14	13.2	11.6	16.1	14.2	20.4	14.2	8.18438	7.95458	7.79806	8.02024	7.66398	7.76818	8.24418	7.97265	7.91148	8.1896
2426	O15254;O15254-2;D6RJ89	Peroxisomal acyl-coenzyme A oxidase 3	ACOX3	0.14426	-0.0779266	-0.222186	no	no	6.0301e-58	966010000	6	6	3	4	3	4	4	4	3	4	3	4	4	4	12.4	77.628	700	11	11	8	9	13	7	6.4	8.7	6.4	8	8.7	8	8.14186	7.95302	7.68918	8.14392	7.85414	7.83131	8.31122	8.11488	7.87199	8.23019
4204	Q13316;Q13316-2	Dentin matrix acidic phosphoprotein 1	DMP1	0.144218	0.346757	0.202539	no	no	0.0027289	392580000	1	1	1	1	1	1	1	1	1	1	1	1	1	1	2.5	55.782	513	2	4	7	5	6	3	2.5	2.5	2.5	2.5	2.5	2.5	6.86027	6.69853	6.35295	7.30844	7.11291	6.86777	8.13906	7.9836	7.61751	8.05492
968	E7ESZ7;C9JGP9;O95299;Q8WXC9;C9J6X0;Q8N1B9	NADH dehydrogenase [ubiquinone] 1 alpha subcomplex subunit 10, mitochondrial	NDUFA10	0.144207	-0.218347	-0.362554	no	no	4.9985e-145	23534000000	15	15	14	14	14	14	14	13	14	14	14	14	14	13	41.3	44.738	390	50	57	53	53	58	51	39	39	39	39	39	36.7	9.47461	9.26354	9.05994	9.49466	9.20804	9.17872	9.7507	9.55195	9.31563	9.46587
5468	Q92878-2;Q92878;Q92878-3;E7EN38;E7ESD9;E9PM98;C9JNH8	DNA repair protein RAD50	RAD50	0.144037	-0.0724488	-0.216486	no	no	1.3044e-212	7459900000	34	34	26	28	25	28	29	25	26	28	25	28	29	25	28.5	154.59	1318	75	75	68	72	80	75	21.7	22.5	19.7	22.7	24.1	20	9.08264	8.86751	8.67441	9.0593	8.7725	8.74353	9.06281	8.84702	8.65567	9.03953
1988	Q92889;F8W7K7;E7ETX4	DNA repair endonuclease XPF	ERCC4	0.143973	0.0105413	-0.133432	no	no	7.2106e-39	233670000	4	4	2	2	4	3	3	2	2	2	4	3	3	2	7.9	104.48	916	2	3	5	4	3	2	3.7	3.7	7.9	6.4	6.4	3.7	7.36793	7.17941	6.91469	7.26907	7.03121	6.89405	7.91259	7.70271	7.49604	7.69487
1930	F6XS94;Q14667;Q08E86;F8W7C5;Q14667-2;Q14667-3	UPF0378 protein KIAA0100	KIAA0100	0.143836	0.0193751	-0.124461	no	no	1.4365e-30	540790000	5	5	3	3	4	3	4	4	3	3	4	3	4	4	2.6	253.68	2235	6	4	5	6	8	6	1.6	1.6	2.3	1.6	2.3	2.3	7.70362	7.48718	7.29743	7.39848	7.10332	7.09149	8.30287	8.0103	7.99324	8.13107
3558	P47897;B4DWJ2;B4DNN3;C9J165;B7Z840;C9JSG9;F2Z2V6	Glutamine--tRNA ligase	QARS	0.143769	0.141319	-0.0024506	no	no	0	24478000000	42	42	33	38	35	34	37	33	33	38	35	34	37	33	62.6	87.798	775	114	107	105	106	113	101	52	58.7	54.7	54.3	56	52.4	9.50614	9.32451	9.03989	9.62058	9.36455	9.26933	9.56905	9.39071	9.09639	9.55924
2758	O95297;O95297-2;O95297-3;Q9UEL6;O95297-4	Myelin protein zero-like protein 1	MPZL1	0.143562	0.100917	-0.0426443	no	no	1.1139e-10	384460000	3	3	2	1	2	3	3	3	2	1	2	3	3	3	8.6	29.082	269	3	5	4	4	6	4	3.7	3.3	3.7	8.6	8.6	8.6	7.41333	7.164	7.05362	7.89212	7.67362	7.48911	7.48741	7.24988	7.11193	7.8516
6112	Q9H4A4;A6NKB8;C9JMZ3	Aminopeptidase B	RNPEP	0.143497	-0.79776	-0.941257	no	no	6.6819e-204	15145000000	24	24	19	22	17	19	21	19	19	22	17	19	21	19	52.2	72.595	650	38	49	40	42	43	47	40.8	45.4	37.2	38.6	46.2	40.5	9.28744	8.99204	8.98073	9.45862	9.07372	9.22786	9.42344	9.12672	9.11807	9.42776
1710	Q8TE82;F5GXD3;F5H166;D6RI07;D6RC98	SH3 domain and tetratricopeptide repeat-containing protein 1	SH3TC1	0.143489	0.535039	0.39155	no	no	1.7044e-07	203410000	2	2	2	2	2	2	2	2	2	2	2	2	2	2	1.5	146.96	1336	3	5	3	3	5	2	1.5	1.5	1.5	1.5	1.5	1.5	7.44658	7.28664	6.93527	7.70741	7.55066	7.18882	7.56953	7.40259	7.0735	7.35816
3682	P51812;B7ZB17;B4DG22;F5GYC4;B1AXG1;F2Z2J1;Q15349-2;Q15349-3;Q15349;B7Z3B5;B7ZL90;Q9UK32;B1AXG2;D6R910;E9PMM7;Q5TI62;Q5SVM7;D6RHW7	Ribosomal protein S6 kinase alpha-3	RPS6KA3	0.143235	-0.32112	-0.464355	no	no	1.742e-111	1591200000	20	13	14	14	13	10	12	17	8	8	7	4	6	10	36.5	83.735	740	15	21	16	10	13	18	24.7	24.9	22.8	19.2	21.4	33.1	8.36603	8.11561	8.00766	8.48424	8.17638	8.18994	8.552	8.31342	8.178	8.18761
2248	Q96GA7;H0YID3;F8VYZ3;H0YIA2	Serine dehydratase-like	SDSL	0.143186	0.602504	0.459318	no	no	9.2295e-19	378230000	4	4	2	3	2	2	3	3	2	3	2	2	3	3	15.8	34.674	329	2	2	2	2	3	3	10.6	15.5	10.6	10.6	15.8	15.8	7.77039	7.63819	7.18941	7.73872	7.56209	7.26266	7.74185	7.56834	7.25952	7.92773
5646	Q96JB2;Q96JB2-2	Conserved oligomeric Golgi complex subunit 3	COG3	0.142772	0.0246781	-0.118094	no	no	3.9858e-29	190270000	6	6	3	4	3	1	4	6	3	4	3	1	4	6	11.2	94.095	828	4	8	6	2	8	10	5.9	6.2	3.9	0.8	6.8	11.2	7.67624	7.25435	7.46965	7.30079	7.06172	6.92749	7.41451	7.19871	7.00728	6.52407
2811	O95848;B3KXY7	Uridine diphosphate glucose pyrophosphatase	NUDT14	0.142735	-1.34619	-1.48893	no	no	4.7871e-66	708230000	3	3	1	2	1	2	2	2	1	2	1	2	2	2	27.9	24.118	222	3	3	3	5	4	4	7.2	12.2	7.2	23	23	23	7.95674	7.57808	7.72155	8.01695	7.55985	7.83049	8.08654	7.73791	7.82842	8.09426
3072	P13716;P13716-2;B7ZBK6	Delta-aminolevulinic acid dehydratase	ALAD	0.142689	-0.141825	-0.284514	no	no	4.4378e-50	509340000	9	9	4	5	3	5	6	3	4	5	3	5	6	3	36.4	36.294	330	4	6	3	5	7	3	16.1	18.5	15.8	21.8	24.2	13.3	7.74809	7.51545	7.36586	8.16625	7.89618	7.83185	7.62543	7.36466	7.28001	7.82941
4115	Q0JRZ9;E9PG79;Q0JRZ9-2;H0YAE2	FCH domain only protein 2	FCHO2	0.142238	-0.770871	-0.91311	no	no	1.4398e-13	936350000	5	5	3	4	5	3	5	5	3	4	5	3	5	5	10.1	88.923	810	12	9	11	11	11	11	7.7	9.3	10.1	6.2	10.1	10.1	8.25481	7.95272	7.95484	8.21155	7.86003	7.95572	8.25518	7.95565	7.95265	8.10041
1812	Q13523;F5H2U2;H0YDJ3;H0YEC8	Serine/threonine-protein kinase PRP4 homolog	PRPF4B	0.142211	0.0597806	-0.0824301	no	no	2.4048e-93	2201900000	12	12	9	9	7	7	8	6	9	9	7	7	8	6	13.8	116.99	1007	12	16	11	10	13	12	10.8	9.8	9.2	8.5	9.8	7.9	8.509	8.32395	8.04926	8.67277	8.42068	8.31658	8.38987	8.18333	7.96792	8.65524
2336	O00743-3;O00743;O00743-2;B7Z3E2;Q5T1S7	Serine/threonine-protein phosphatase 6 catalytic subunit	PPP6C	0.142185	-0.0059029	-0.148088	no	no	4.0952e-57	2900300000	7	7	7	6	7	7	6	7	7	6	7	7	6	7	26.6	38.946	342	18	20	16	18	16	22	26.6	22.8	26.6	26.6	24	26.6	8.42185	8.22443	7.98448	8.75086	8.48583	8.41059	8.59522	8.40698	8.14142	8.58814
4719	Q5VIR6-4;Q5VIR6;Q5VIR6-2;Q5VIR6-3;G3V0H8;F6VX93;E7EVT8;Q8NCR1	Vacuolar protein sorting-associated protein 53 homolog	VPS53	0.141777	0.115472	-0.0263043	no	no	1.7736e-76	1109900000	10	10	6	6	5	7	6	6	6	6	5	7	6	6	21.9	94.404	832	13	13	10	12	13	13	12.6	11.7	14.5	13.9	12.1	13.7	8.18475	8.01005	7.70487	8.1634	7.91248	7.80571	8.27556	8.09639	7.80456	8.27869
4936	Q7Z2Z2;Q7Z2Z2-2;H0YK75	Elongation factor Tu GTP-binding domain-containing protein 1	EFTUD1	0.141637	-0.0554733	-0.19711	no	no	1.2207e-104	2126000000	17	17	9	10	11	11	10	13	9	10	11	11	10	13	17.7	125.43	1120	18	20	18	19	21	18	8.8	9.6	12.2	11.2	10.2	12.3	8.522	8.34213	8.05235	8.46371	8.20328	8.1179	8.56236	8.36795	8.11972	8.55322
1846	F5H4K0;Q5T9L3-2;Q5T9L3;Q5JRS7;F5GZ46;E9PM62;H0YCG9;E9PJW4;E9PKJ0;E9PQK1;H0YDL2;Q7Z430	Protein wntless homolog	WLS;GPR177	0.141621	0.309824	0.168204	no	no	1.9895e-45	1844000000	7	7	3	4	6	5	3	5	3	4	6	5	3	5	14.7	62.719	545	10	13	9	11	10	11	8.1	9.4	13	11.2	8.1	10.8	8.47496	8.32176	7.94809	8.40219	8.19028	7.98892	8.53076	8.38466	7.98662	8.57298
1670	Q96KG9;E9PS17;Q96KG9-2;Q96KG9-4;E9PK59;Q96KG9-3;Q96KG9-6;Q96KG9-5;E9PPN3;E7ET66;H0YDH0;H0YCI6	N-terminal kinase-like protein	SCYL1	0.141543	-0.110631	-0.252173	no	no	3.7569e-237	8288000000	28	28	18	20	19	21	20	20	18	20	19	21	20	20	48	89.63	808	41	46	39	43	45	39	33.5	35.6	34.2	39.7	32.2	33.7	9.1271	8.91491	8.71431	9.06648	8.78337	8.74673	9.18554	8.98019	8.76162	9.22935
2659	O75648;O75648-2;O75648-5;B4DZN5;O75648-4;O75648-3;Q2PPL5	Mitochondrial tRNA-specific 2-thiouridylase 1	TRMU	0.141456	0.212317	0.0708604	no	no	1.8483e-79	336020000	4	4	2	3	3	3	2	3	2	3	3	3	2	3	16.9	47.744	421	4	5	3	5	4	5	8.6	13.8	13.8	13.8	8.6	11.6	7.47344	7.32535	6.93421	7.62355	7.42174	7.19371	7.72295	7.47615	7.35993	8.04879
1482	Q5JTH9;E9PCK7;Q5JTH9-2;F5H456	RRP12-like protein	RRP12	0.141239	0.519321	0.378082	no	no	2.1655e-129	4691500000	24	24	15	17	14	15	16	17	15	17	14	15	16	17	25.1	143.7	1297	25	33	27	23	28	32	16	16.5	15.7	15	17.4	18.4	8.68813	8.50879	8.21748	8.91254	8.70842	8.48657	8.83779	8.62905	8.41941	8.85519
3794	P57740;B4DZ67;Q6PJE1;H0YG15;G3V1T4	Nuclear pore complex protein Nup107	NUP107	0.140985	0.00913221	-0.131853	no	no	2.3903e-132	3685200000	20	20	13	14	15	14	17	16	13	14	15	14	17	16	26.2	106.37	925	29	29	29	35	32	27	21.4	18.2	19.4	20.6	24.8	19.5	8.71164	8.50791	8.28502	8.72272	8.45891	8.38099	8.7352	8.54548	8.28411	8.77759
6426	Q9NXE4-4;Q9NXE4;Q9NXE4-2;Q9NXE4-3;E7ESA2;B4DM23;G8JLC4;B4DQ31;B4DWK7;B4E0L6;Q9NXE4-5;C9J647;F2Z2W5;F2Z2I0;F8WF03	Sphingomyelin phosphodiesterase 4	SMPD4	0.140947	0.0824231	-0.0585243	no	no	1.3444e-43	1280600000	12	12	6	9	6	7	8	8	6	9	6	7	8	8	17.6	98.147	873	11	16	11	13	14	14	7.3	12.1	10	9.6	10.7	10.7	8.2796	8.08253	7.84166	8.54641	8.29927	8.18384	8.15755	7.97002	7.7024	8.30673
2604	O75165;F5GX04;H0Y8Q2;H0YA63	DnaJ homolog subfamily C member 13	DNAJC13	0.140886	-0.20201	-0.342896	no	no	0	18186000000	55	55	41	42	33	41	47	42	41	42	33	41	47	42	30.8	254.41	2243	100	104	86	104	109	99	23.3	22.9	18.9	23.3	27.1	24.1	9.37831	9.16539	8.96658	9.41921	9.12953	9.10656	9.48799	9.28405	9.06172	9.50432
4027	Q01780;Q01780-2;B4DKG8	Exosome component 10	EXOSC10	0.140504	0.0144559	-0.126048	no	no	2.8216e-213	6345400000	27	27	18	21	20	18	23	19	18	21	20	18	23	19	40.5	100.83	885	33	37	34	33	39	32	30.5	34.8	35.7	28.8	36.8	29.4	8.91386	8.74029	8.43164	8.96143	8.70513	8.61053	8.97404	8.78677	8.51845	9.06521
417	Q96CB9;B4DHA4;Q96CB9-3	Putative methyltransferase NSUN4	NSUN4	0.140394	0.0995717	-0.0408223	no	no	1.4194e-09	344910000	2	2	2	2	2	1	2	2	2	2	2	1	2	2	3.1	43.088	384	4	3	3	2	3	3	3.1	3.1	3.1	3.1	3.1	3.1	7.94001	7.75853	7.47346	7.50733	7.23867	7.17132	7.87188	7.69336	7.39959	6.90959
418	Q96DH6;B4DHE8;Q96DH6-2;B4DM51;Q96DH6-3	RNA-binding protein Musashi homolog 2	MSI2	0.140304	-0.341014	-0.481319	no	no	5.97e-27	241210000	4	4	3	2	1	3	2	3	3	2	1	3	2	3	15.9	35.196	328	3	4	1	5	1	6	12.2	7.6	3	11.3	7.6	11.3	7.56779	7.25782	7.27552	7.63567	7.31865	7.35007	7.10356	6.87113	6.72101	7.77158
6817	Q9Y2U8	Inner nuclear membrane protein Man1	LEMD3	0.140091	0.10799	-0.0321009	no	no	5.6066e-49	1027300000	11	11	6	7	5	8	6	9	6	7	5	8	6	9	17.9	99.996	911	7	10	7	12	12	10	8.1	8.7	6.6	14.4	7.7	12	8.11926	7.94721	7.63395	8.24697	7.97505	7.91474	8.07295	7.85808	7.66432	8.2416
6806	Q9Y2Q3-2;Q9Y2Q3;Q9Y2Q3-3;E9PFN5;Q9Y2Q3-4;C9JNT3	Glutathione S-transferase kappa 1	GSTK1	0.140086	-0.383276	-0.523361	no	no	8.9833e-94	5862700000	11	11	8	10	10	7	10	7	8	10	10	7	10	7	46.5	31.566	282	20	27	28	20	29	25	29.4	44	42.2	27	42.2	36.2	8.83219	8.5877	8.46614	9.06213	8.78077	8.74047	9.00009	8.75028	8.64102	8.86813
857	Q7Z3U7;Q7Z3U7-4;B9EGP5;F8VWA6;Q7Z3U7-2;F8W1Z6;F8VZV1;Q7Z3U7-3;G8JL93	Protein MON2 homolog	MON2	0.139996	-0.23585	-0.375846	no	no	1.7455e-37	569050000	7	7	2	1	4	1	2	5	2	1	4	1	2	5	5.2	190.48	1718	4	4	7	2	5	9	2.2	0.9	3.5	0.9	1.6	4	7.73977	7.48493	7.38705	7.72768	7.46867	7.38012	8.08543	7.82598	7.73842	7.38392
1872	Q96JG6;F5H5U7;B4DS55;Q5JPD9;H0Y7Q2;Q75N11;Q96JG6-2	Coiled-coil domain-containing protein 132	CCDC132;DKFZp313I2429	0.139939	-0.176323	-0.316262	no	no	1.0168e-95	810160000	10	10	7	7	6	9	7	6	7	7	6	9	7	6	15.7	111.17	964	15	15	12	19	12	12	11.2	10.3	8.2	14.4	10.6	10.5	8.10622	7.83041	7.77839	8.07291	7.76393	7.77968	8.06878	7.8431	7.67656	8.19223
4056	Q03468;H0Y3B0;F5H493;D6R9X7	DNA excision repair protein ERCC-6	ERCC6	0.139632	0.675466	0.535834	no	no	8.8936e-34	237160000	6	3	5	4	3	4	4	5	2	2	1	1	2	3	4.2	168.41	1493	4	5	4	4	4	7	3.3	2.5	1.7	2.6	2.5	3.3	7.55642	7.41514	6.99998	7.50316	7.30443	7.06807	7.58358	7.46087	6.97478	7.62556
1986	Q9NZJ7;Q9NZJ7-2;F8W7H0;H0Y8C3;Q5TDC2;B4E0C5;Q9NZJ7-3	Mitochondrial carrier homolog 1	MTCH1	0.139111	0.462356	0.323245	no	no	2.718e-49	3361700000	11	11	7	8	10	10	5	7	7	8	10	10	5	7	40.6	41.544	389	12	17	14	10	11	13	20.6	23.7	30.6	37.5	15.2	19.8	8.5126	8.35081	8.0054	8.8384	8.59504	8.47085	8.68443	8.52609	8.1695	8.64049
4846	H0YNJ6;Q6PKC0;Q9P2T1-2;Q9P2T1;H0YLV5;Q86T14;H0YMB3;H0YNH0;H0YMV5;H0YMR9;H0YLB8;H0YK71;H0YK13;H0YMG3;H0YNS9;H0YMW6;H0YN22;H0YL68	GMP reductase;GMP reductase 2	GMPR2	0.138971	-0.450697	-0.589668	no	no	1.5846e-54	3826900000	12	9	7	9	7	8	7	8	6	8	5	7	6	6	29	46.937	427	8	17	8	12	14	12	19.4	26	21.3	23.7	21.5	23.2	8.87898	8.21296	8.77343	9.10755	8.43573	9.00355	8.65687	8.22058	8.45883	8.51984
1543	E9PFW3;Q96CW1;Q96CW1-2;F5H0H0;B4DJB1;C9JJ47;C9JGT8;C9JTK4;C9JPV8;C9JJD3	AP-2 complex subunit mu	AP2M1	0.138958	-0.125519	-0.264476	no	no	1.8239e-71	11006000000	15	15	10	12	11	10	11	11	10	12	11	10	11	11	35.9	52.303	460	25	36	33	37	34	33	23.5	29.3	25.9	23.7	26.1	25.4	9.10006	8.90194	8.66387	9.26293	9.00424	8.91497	9.23193	9.03906	8.78651	9.19808
1838	Q5VTE6;F5H476;Q96AL9	Protein angel homolog 2	ANGEL2	0.138905	0.0633037	-0.0756011	no	no	1.0964e-05	170110000	1	1	1	1	1	1	1	1	1	1	1	1	1	1	2.2	62.338	544	3	3	3	3	3	4	2.2	2.2	2.2	2.2	2.2	2.2	7.41318	7.18224	7.02849	7.33736	7.06874	7.0013	7.57448	7.3871	7.11912	7.47451
5714	Q96QG7;B7Z291;E9PR67	Myotubularin-related protein 9	MTMR9	0.138881	0.0345444	-0.104337	no	no	2.4287e-43	870590000	3	3	1	1	2	2	2	3	1	1	2	2	2	3	8.2	63.461	549	6	5	7	8	6	6	3.6	3.6	6.6	6.6	6.6	8.2	8.03064	7.83305	7.59361	7.82813	7.57408	7.47442	8.29157	8.0993	7.84512	8.13868
1542	P25054;P25054-2;E9PFT7;B7Z2B6	Adenomatous polyposis coli protein	APC	0.13873	-0.0375931	-0.176323	no	no	4.8129e-69	174670000	3	3	2	2	3	2	2	2	2	2	3	2	2	2	2.6	311.64	2843	3	2	5	4	4	3	1.5	1.5	2.6	1.5	1.5	1.5	7.63139	7.43345	7.19493	6.91707	6.65657	6.57135	7.63797	7.45284	7.17837	7.46798
5337	Q8TDW0;E9PHY6;A6NED7	Leucine-rich repeat-containing protein 8C	LRRC8C	0.138638	-0.422664	-0.561302	no	no	1.7349e-151	5924100000	21	19	17	21	16	15	16	16	15	19	15	14	15	15	32.9	92.448	803	35	47	38	35	37	36	27.6	32.9	26.2	24	25.4	24.9	8.84504	8.60154	8.47767	9.08372	8.76823	8.79669	8.95925	8.70209	8.60942	8.9381
6590	Q9UH99;B0QY62;E9PGW0;B0QY64;E9PDF7;B0QY60;B0QY67;B0QY66;B0QY68;B0QY69;H0Y686	SUN domain-containing protein 2	SUN2;UNC84B	0.138196	-0.0846086	-0.222805	no	no	5.7155e-280	11106000000	23	19	20	15	20	17	17	16	17	14	18	15	14	14	52.6	80.31	717	42	36	47	40	39	33	45.9	29.6	47.3	37.9	37.2	31.2	9.24662	9.05408	8.80068	9.25782	9.00113	8.90743	9.38794	9.17044	8.98342	9.15278
2718	O94885;F5GYF4;F5H0A8	SAM and SH3 domain-containing protein 1	SASH1	0.137756	0.134873	-0.00288247	no	no	1.9973e-94	1728100000	14	13	8	8	7	9	10	9	7	7	6	8	9	9	17.2	136.65	1247	15	18	14	15	17	20	10.9	10.8	9.8	12	13.1	11.6	8.38204	8.17569	7.95975	8.31735	8.06937	7.9559	8.58773	8.40413	8.12529	8.53006
3412	P35270	Sepiapterin reductase	SPR	0.137685	0.0866606	-0.051024	no	no	2.9007e-64	3920400000	6	6	4	5	4	6	5	5	4	5	4	6	5	5	31.8	28.048	261	18	19	21	22	20	21	20.7	24.5	20.7	31.8	24.5	24.5	8.72993	8.55007	8.26026	8.80555	8.59562	8.3891	8.82751	8.63032	8.38975	8.83243
1583	Q9UPV0;Q9UPV0-2;E9PI34	Centrosomal protein of 164 kDa	CEP164	0.137169	0.0976099	-0.0395595	no	no	1.7141e-06	681240000	1	1	1	1	1	1	1	1	1	1	1	1	1	1	0.9	164.31	1460	2	3	3	3	3	3	0.9	0.9	0.9	0.9	0.9	0.9	7.92546	7.73708	7.47192	8.02379	7.77922	7.65779	8.12182	7.94545	7.64522	7.93866
2954	P08133;E9PGK1;B7Z582;E7EMC6	Annexin A6;Annexin	ANXA6	0.136961	0.389754	0.252793	no	no	0	860880000	55	2	51	54	53	52	50	53	2	2	2	2	2	2	73.3	75.872	673	5	4	6	5	5	4	70.6	73.1	72.4	70.7	69.1	72.8	8.11929	7.96213	7.60157	7.97806	7.78533	7.53242	8.3085	8.14768	7.79918	8.27885
6746	Q9UPS6	Histone-lysine N-methyltransferase SETD1B	SETD1B	0.136905	-0.0422242	-0.179129	no	no	2.8946e-24	81110000	2	2	2	2	2	2	2	2	2	2	2	2	2	2	1.4	208.73	1923	3	3	3	3	3	3	1.4	1.4	1.4	1.4	1.4	1.4	7.25132	7.03278	6.8484	6.97028	6.71579	6.61711	7.17067	6.98683	6.70866	6.82263
3252	P23743;F8W1H7;F8W1M3;P23743-2;C9JM35;G3V327;F8VNZ9;G3V4E1;G3V4I3;H0YJH4;G3V312;F8VU33;F8VWX8	Diacylglycerol kinase alpha	DGKA	0.136599	0.101397	-0.0352017	no	no	9.6223e-48	1305100000	7	7	5	6	6	7	6	5	5	6	6	7	6	5	12.7	82.629	735	8	11	14	17	11	12	8.6	10.2	11	12.7	11	8.7	8.09715	7.89487	7.66814	8.27971	8.01144	7.94324	8.41041	8.21717	7.96566	8.42318
4036	Q02241;Q02241-2;H0YNS5;B4E1K0;H0YMJ4;H0YNT8;H0YKQ5;H0YME6;H0YMI3;H0YNT9;H0YMH4	Kinesin-like protein KIF23	KIF23	0.136542	-0.263996	-0.400538	no	no	8.7767e-20	182510000	7	7	2	3	3	4	3	6	2	3	3	4	3	6	10.2	110.06	960	6	10	5	10	10	12	2.6	3.3	3.3	4.7	3.3	8.9	7.18591	6.91666	6.8506	7.20669	6.894	6.91703	7.23487	6.97386	6.88974	7.77239
6383	Q9NVZ3-2;Q9NVZ3;Q9NVZ3-4;D6RB24;F6SKB8;B4DUR7;Q9NVZ3-3;D6RAN6;H0Y970	Adaptin ear-binding coat-associated protein 2	NECAP2	0.136388	-0.0827026	-0.219091	no	no	2.8513e-47	4765400000	5	5	4	4	4	4	4	4	4	4	4	4	4	4	27.5	29.464	273	15	12	14	12	16	12	20.5	20.5	20.5	22	20.5	20.5	8.88658	8.61674	8.55195	8.72459	8.41041	8.43632	9.00095	8.78972	8.58661	8.71195
4593	Q562F6;Q562F6-2;Q562F6-3	Shugoshin-like 2	SGOL2	0.136359	0.616414	0.480056	no	no	2.9624e-11	42671000	1	1	1	1	1	1	1	1	1	1	1	1	1	1	1.2	144.74	1265	2	2	2	2	2	2	1.2	1.2	1.2	1.2	1.2	1.2	6.86646	6.72744	6.30406	6.5842	6.39658	6.12924	6.8684	6.71489	6.34224	7.01284
1489	E9PEJ6;P98196;E9PCW5;H0Y547;E7EMP5;H0Y8F0	Probable phospholipid-transporting ATPase IH	ATP11A	0.136239	-0.539035	-0.675274	no	no	8.2096e-70	823660000	4	3	2	4	2	3	3	3	2	3	2	3	3	3	5.1	135.85	1191	9	6	7	6	8	8	3.5	5.1	3.5	4.5	4.5	4.5	8.01423	7.79543	7.61167	7.89502	7.63188	7.55247	8.21181	8.0103	7.78149	7.99711
3586	P49189;B4DXY7	4-trimethylaminobutyraldehyde dehydrogenase	ALDH9A1	0.136167	-0.200002	-0.336169	no	no	1.0674e-94	10797000000	18	18	13	13	15	15	15	14	13	13	15	15	15	14	41.1	53.801	494	32	38	33	38	35	32	34.4	33.8	38.1	31.6	34	33.4	9.15073	8.94657	8.72482	9.34539	9.06322	9.02461	9.19769	8.98021	8.79312	9.16841
1006	P05165;P05165-2;C9JPQ8;H0Y5U0;Q5JTW5;Q5JTW6;H0YG57	Propionyl-CoA carboxylase alpha chain, mitochondrial	PCCA	0.136096	-0.603407	-0.739502	no	no	1.9482e-62	1556600000	10	10	9	8	7	9	8	8	9	8	7	9	8	8	15.2	80.058	728	19	17	13	14	20	16	14	12.5	11.4	14.1	12.5	12.5	8.43049	8.13909	8.11962	8.24851	7.91279	7.97961	8.38036	8.09809	8.05968	8.45093
3151	P17612;P17612-2;B7Z708	cAMP-dependent protein kinase catalytic subunit alpha	PRKACA	0.136026	-0.364573	-0.500598	no	no	4.6175e-101	1101200000	15	6	9	11	13	9	12	13	4	5	5	4	5	6	42.7	40.589	351	6	11	11	10	11	13	29.9	33.9	36.5	33.6	36.5	36.5	8.20645	7.97966	7.8158	8.1182	7.80396	7.82997	8.21756	7.95595	7.87318	8.39559
6669	Q9UKV8;Q9UKV8-2;E5RJY2	Protein argonaute-2	EIF2C2	0.135947	-0.0528332	-0.188781	no	no	4.0047e-109	3148700000	12	9	11	6	7	7	8	7	8	5	5	6	6	5	20.6	97.207	859	19	20	18	19	21	19	19.2	10.4	12	12.2	13.2	11.9	8.68467	8.47319	8.27068	8.70271	8.44329	8.35564	8.69045	8.50772	8.22629	8.68034
704	Q7Z392;Q7Z392-3;B7WNP8;Q7Z392-4;D6RHE5;Q7Z392-2;D6R9T9	Trafficking protein particle complex subunit 11	TRAPPC11	0.135879	-0.187894	-0.323774	no	no	7.4295e-99	1185600000	11	11	8	10	6	9	9	10	8	10	6	9	9	10	15.8	128.88	1133	10	13	8	13	16	13	11.4	13.6	9.3	13.8	13.6	14.6	8.16301	7.93632	7.77225	8.24741	7.9474	7.94536	8.13386	7.9124	7.7353	8.33474
877	Q8N4C6-7;Q8N4C6-10;Q8N4C6-5;Q8N4C6;Q8N4C6-2;Q8N4C6-9;C9J066;Q8N4C6-4;E9PN67;H0YEL6;H0YDJ4;Q5BKU3;F8W6D3;Q8N4C6-6	Ninein	NIN	0.135798	0.0606079	-0.0751904	no	no	8.0586e-11	1602400000	4	3	4	4	4	3	3	4	3	3	3	2	2	3	2.8	248.19	2133	3	4	7	3	2	5	2.8	2.8	2.8	2.1	2.3	2.8	8.03751	7.84574	7.59015	7.66238	7.42557	7.28598	8.76655	8.58504	8.30005	8.06774
4348	Q14997;Q14997-2;Q14997-3;F8WB44;F8WBH5;Q14997-4	Proteasome activator complex subunit 4	PSME4	0.135759	0.0816749	-0.0540844	no	no	4.3954e-184	4874300000	24	24	17	19	21	19	18	19	17	19	21	19	18	19	19.4	211.33	1843	41	51	51	39	44	51	13.5	16.6	17.4	15	15.8	16.1	8.79169	8.59408	8.35465	8.8569	8.59818	8.509	8.91711	8.74088	8.44028	8.84289
3644	P50552	Vasodilator-stimulated phosphoprotein	VASP	0.135593	0.18641	0.0508162	no	no	1.7018e-82	13939000000	11	11	9	8	10	8	8	9	9	8	10	8	8	9	32.4	39.829	380	32	33	37	32	32	37	30.5	27.1	30.8	27.1	27.1	29.5	9.31302	9.14947	8.80967	9.37383	9.14956	8.97948	9.38193	9.19584	8.92411	9.28115
5438	Q92604	Acyl-CoA:lysophosphatidylglycerol acyltransferase 1	LPGAT1	0.135331	0.198891	0.06356	no	no	7.6657e-18	641060000	4	4	2	2	3	3	2	2	2	2	3	3	2	2	19.7	43.089	370	2	4	5	3	2	2	10.5	10.5	13	16.2	10.5	10.5	8.08045	7.9241	7.56091	7.9291	7.69415	7.55011	7.61975	7.42357	7.18021	8.10927
4760	Q66K14;Q66K14-2;G3V133;F5H6M5;H0YB08;F5H5B8;E5RIN2	TBC1 domain family member 9B	TBC1D9B	0.135131	-0.236707	-0.371838	no	no	2.552e-68	1148000000	14	11	6	9	10	7	7	6	4	8	7	6	6	5	14.4	140.52	1250	11	18	15	15	17	17	6.7	10.2	10.4	7.9	8.7	7	8.17777	7.95965	7.77418	8.34288	8.04025	8.04344	8.31913	8.12156	7.88201	8.29728
2834	P00367;F5GYQ4;P49448	Glutamate dehydrogenase 1, mitochondrial;Glutamate dehydrogenase;Glutamate dehydrogenase 2, mitochondrial	GLUD1;GLUD2	0.135098	-0.0594936	-0.194591	no	no	0	7807400000	31	7	29	30	30	29	31	30	6	7	6	6	7	7	62.7	61.397	558	25	29	22	24	26	24	59.9	62.5	59.7	58.1	62.7	62.7	9.0393	8.84033	8.60465	9.08425	8.81929	8.74389	9.12271	8.92676	8.6828	9.18321
904	Q5JVF3-4;C9J439;F8W955;Q5JVF3;Q5JVF3-2;Q5JVF3-3;F8WEF4	PCI domain-containing protein 2	PCID2	0.135046	-0.14496	-0.280006	no	no	6.7444e-63	2972300000	11	11	5	7	6	6	7	9	5	7	6	6	7	9	30	52.099	453	13	17	19	21	24	23	13.9	19.4	16.1	16.3	21.4	25.4	8.65483	8.45022	8.22968	8.62028	8.33858	8.29905	8.64479	8.43151	8.23366	8.52617
3378	P32019;P32019-2;P32019-4;P32019-3;E7ESY0;B1ARF3	Type II inositol 1,4,5-trisphosphate 5-phosphatase	INPP5B	0.134531	-0.0473989	-0.181929	no	no	1.6021e-29	409470000	5	5	5	4	4	4	5	3	5	4	4	4	5	3	9.4	112.85	993	6	5	5	5	5	4	9.4	7.5	7.5	7.5	9.4	5.7	8.07092	7.88004	7.62201	7.52427	7.15186	7.28452	7.79508	7.53657	7.44691	7.96361
5421	Q92499;B4DPN6;B4DME8	ATP-dependent RNA helicase DDX1	DDX1	0.134479	0.13174	-0.0027385	no	no	0	35433000000	40	40	33	35	34	33	36	36	33	35	34	33	36	36	58.9	82.431	740	113	119	122	112	117	122	51.5	52.4	51.1	52	53.6	51.6	9.65104	9.46939	9.18478	9.78215	9.53959	9.41353	9.76498	9.58489	9.29579	9.68409
3360	P30837;B4DLJ0;H0YKF9	Aldehyde dehydrogenase X, mitochondrial	ALDH1B1	0.134259	-0.279768	-0.414027	no	no	3.0643e-117	2855300000	17	15	13	14	10	12	13	13	11	12	8	10	11	11	43.9	57.206	517	15	18	13	15	17	13	32.7	38.1	26.7	31.1	33.8	33.7	8.65479	8.43099	8.25978	8.76684	8.45585	8.47554	8.53954	8.24224	8.23477	8.54273
6876	Q9Y490;Q5TCU6	Talin-1	TLN1	0.134162	-0.0255958	-0.159758	no	no	0	177100000000	144	129	129	123	129	122	127	127	116	113	116	110	113	113	65.8	269.76	2541	328	344	340	332	319	307	58.4	57.7	59.5	58.5	56.6	56.3	10.4629	10.2611	10.0329	10.4847	10.2232	10.1403	10.4825	10.2888	10.0385	10.4269
3303	P27635;A6QRI9;B8A6G2	60S ribosomal protein L10	RPL10	0.134122	0.268678	0.134556	no	no	5.723e-178	12444000000	14	2	12	11	11	12	12	12	2	2	2	2	2	2	52.3	24.604	214	6	5	5	7	6	5	47.2	47.2	47.2	50.5	50.5	49.1	9.2643	9.11076	8.73825	9.11554	8.88882	8.72483	9.41167	9.25135	8.90121	9.56593
5317	E9PH93;Q8TC07-2;Q8TC07;C9JA93;A8K8E1;F8VV61;F8WCB5;F8WF35;F8WDJ1	TBC1 domain family member 15	TBC1D15	0.133974	-0.282973	-0.416948	no	no	5.6365e-65	1392300000	14	14	6	9	5	6	9	9	6	9	5	6	9	9	26.5	78.572	682	15	21	10	16	19	20	12.9	16.3	11.9	14.1	17.4	19.6	8.2806	8.06815	7.86817	8.37357	8.06465	8.0803	8.39867	8.19648	7.96948	8.13261
4992	Q86TI2-2;Q86TI2;Q86TI2-4;Q86TI2-5;Q86TI2-3	Dipeptidyl peptidase 9	DPP9	0.133536	-0.296428	-0.429964	no	no	6.5793e-90	3012100000	17	17	10	11	10	12	12	13	10	11	10	12	12	13	26.5	101.67	892	19	25	27	29	24	23	18.6	19.4	18.3	20.3	19.7	21.4	8.4832	8.25266	8.09799	8.70256	8.41256	8.39021	8.70141	8.46824	8.31992	8.75415
5444	Q92620;B4DVG8;B4DN69	Pre-mRNA-splicing factor ATP-dependent RNA helicase PRP16	DHX38	0.133453	0.0407046	-0.0927488	no	no	9.1459e-246	2788900000	24	24	19	15	17	19	17	16	19	15	17	19	17	16	27.3	140.5	1227	24	25	24	25	23	25	22.2	18.7	20.9	21.8	21.1	19.5	8.61077	8.41632	8.16814	8.5152	8.26062	8.16215	8.81981	8.64466	8.34082	8.74529
6905	Q9Y5B9;F5H063;G3V401;G3V5A4;G3V2X0	FACT complex subunit SPT16	SUPT16H	0.133183	-0.017637	-0.15082	no	no	0	11794000000	39	39	31	32	26	30	33	34	31	32	26	30	33	34	45.9	119.91	1047	82	80	71	79	88	87	36.1	39.3	33.5	34.2	36.6	40.6	9.22321	9.02657	8.78444	9.29334	9.01376	8.96975	9.26668	9.06703	8.83313	9.26944
4288	Q14152;F5H335	Eukaryotic translation initiation factor 3 subunit A	EIF3A	0.133009	0.318434	0.185425	no	no	0	67345000000	60	60	54	56	54	53	53	54	54	56	54	53	53	54	39	166.57	1382	172	181	170	170	181	172	34.7	37.6	36.7	35.3	36	36	9.98828	9.82943	9.47449	10.0603	9.84595	9.65085	10.0508	9.88753	9.54697	9.97161
6771	Q9Y243;Q9Y243-2;F8VS91	RAC-gamma serine/threonine-protein kinase	AKT3	0.132946	-0.47747	-0.610417	no	no	6.3996e-108	1242400000	11	7	8	9	7	8	9	10	5	6	5	5	5	7	28.6	55.774	479	8	9	7	10	9	9	21.3	24.6	21.3	21.3	23.4	26.5	8.15564	7.90646	7.79571	8.25746	7.95415	7.9587	8.30805	8.08693	7.909	8.39629
2052	F8WEA9;Q8IVT5;F5H0K8;Q8IVT5-2;Q8IVT5-3;A8MY87	Kinase suppressor of Ras 1	KSR1	0.132935	0.0288667	-0.104068	no	no	8.408e-21	321240000	4	4	2	2	1	4	3	2	2	2	1	4	3	2	6.1	102.16	923	2	3	2	5	4	4	3.8	3.8	1.6	6.1	5.1	3.8	7.66264	7.41609	7.29929	7.49732	7.26176	7.11919	7.66555	7.4383	7.27561	7.88145
749	E7EPF7;Q99571;B7Z4R5;F6RU17;F5H1M6	P2X purinoceptor;P2X purinoceptor 4	P2RX4	0.132925	-0.16877	-0.301695	no	no	6.9077e-20	638840000	2	2	2	1	2	2	2	1	2	1	2	2	2	1	7.9	45.305	404	2	2	3	2	3	1	7.9	5.7	7.9	7.9	7.9	5.7	8.04387	7.82705	7.63826	7.94207	7.62474	7.65676	8.19326	7.96095	7.81057	7.99942
6936	Q9Y613;B4DVN5	FH1/FH2 domain-containing protein 1	FHOD1	0.132884	0.10743	-0.025454	no	no	8.8192e-124	4737900000	23	23	18	16	12	17	14	14	18	16	12	17	14	14	26	126.55	1164	31	30	25	30	29	28	22.6	17.2	15.6	20	15.7	17.2	8.89836	8.67109	8.50842	8.83237	8.56644	8.49315	8.94072	8.76119	8.47038	8.85139
6791	Q9Y2G8;Q5TDH4;Q5TDG9;Q9Y2G8-2	DnaJ homolog subfamily C member 16	DNAJC16	0.132855	0.303152	0.170297	no	no	3.1481e-58	558920000	5	5	4	5	4	4	5	4	4	5	4	4	5	4	11.1	90.59	782	11	10	8	10	11	11	8.8	11.1	7.8	8.8	11.1	8.8	7.98277	7.82838	7.45871	7.82037	7.5893	7.43589	8.09861	7.92074	7.62506	8.0782
5229	Q8NBM8;E7EVZ5;D6R9J0	Prenylcysteine oxidase-like	PCYOX1L	0.132632	0.00618789	-0.126444	no	no	7.1455e-22	474210000	7	7	3	4	7	2	4	4	3	4	7	2	4	4	14.4	54.646	494	5	9	11	4	7	7	3.8	8.3	14.4	3.8	8.9	8.9	7.70274	7.48426	7.2997	8.0443	7.79152	7.68898	7.93973	7.72208	7.53541	7.69257
6761	Q9UQC2;Q9UQC2-2;E9PJE2;E9PJ26	GRB2-associated-binding protein 2	GAB2	0.132587	0.169793	0.0372068	no	no	1.8264e-21	308590000	2	2	2	2	2	2	2	2	2	2	2	2	2	2	4.3	74.457	676	4	4	4	4	4	4	4.3	4.3	4.3	4.3	4.3	4.3	7.72806	7.58067	7.1871	7.33718	7.09493	6.96817	7.94138	7.76018	7.47429	7.87526
4779	Q6DD88;F5GWF8	Atlastin-3	ATL3	0.132563	0.241782	0.109219	no	no	2.5251e-268	1135700000	16	1	13	13	15	14	14	13	1	1	1	1	1	1	46.4	60.541	541	5	6	4	4	5	6	40.5	40.5	42.5	44.4	40.7	38.4	8.2971	8.12048	7.82107	8.29436	8.08824	7.87171	8.32379	8.15815	7.82493	8.22668
168	Q9Y4B5;A8MQ54;Q9Y4B5-3;Q9Y4B5-2;Q9Y4B5-4;H0YAX5	Protein SOGA2	SOGA2	0.132542	0.567276	0.434734	no	no	2.0977e-79	1184800000	11	10	5	5	9	6	6	4	5	5	8	5	5	4	8.2	208.75	1896	10	13	9	9	8	9	3.6	4	7.2	4.7	4.7	3	8.16909	8.0223	7.62664	8.2168	8.08001	7.64844	8.27182	8.14805	7.66622	8.35691
1526	E9PEN8;Q9UIA9;E7ESC6;H0YBE1;E5RIW1	Exportin-7	XPO7	0.132241	-0.0719	-0.204141	no	no	2.7158e-139	5409000000	18	18	14	16	14	15	15	14	14	16	14	15	15	14	22.6	124.84	1096	21	27	24	25	25	27	19.5	20.3	20.3	20.3	20.3	17.5	8.80026	8.59502	8.37616	9.01187	8.75326	8.6638	8.97338	8.75478	8.57052	8.91852
3333	P29992;P19086;E9PC54;E7EUG4	Guanine nucleotide-binding protein subunit alpha-11	GNA11	0.132136	-0.1333	-0.265437	no	no	7.41e-112	7922800000	13	8	10	11	12	10	10	10	7	8	7	7	7	7	39.8	42.123	359	31	29	28	26	26	29	35.7	37.6	37.9	35.7	35.7	35.7	9.09216	8.88812	8.66601	8.98334	8.71683	8.64482	9.13043	8.92229	8.71109	9.17679
4771	Q68E01;Q68E01-2;Q68E01-3;Q68E01-4;H0Y8Z1	Integrator complex subunit 3	INTS3	0.13195	0.10324	-0.0287106	no	no	3.8825e-80	1670100000	8	8	6	7	7	6	6	4	6	7	7	6	6	4	11.5	118.07	1043	14	13	10	10	13	8	8.7	9.6	10.6	9.4	8.7	5.8	8.48627	8.32303	7.9823	8.33883	8.08275	7.98765	8.49596	8.31792	8.02268	8.47783
1533	E9PF18;Q16836;Q16836-2	Hydroxyacyl-coenzyme A dehydrogenase, mitochondrial	HADH	0.131791	-0.643302	-0.775093	no	no	7.9686e-186	8565200000	11	11	10	8	10	8	10	9	10	8	10	8	10	9	41.2	35.236	318	36	38	53	39	39	47	39.9	36.8	39.9	32.1	38.4	39.6	9.19343	8.93006	8.85117	9.01895	8.67776	8.75468	9.31144	9.00436	9.01636	9.07922
5475	Q92922;F8WE13	SWI/SNF complex subunit SMARCC1	SMARCC1	0.131748	0.483319	0.351571	no	no	3.8968e-237	3138900000	20	13	18	12	14	15	18	16	11	10	10	10	12	11	21.2	122.87	1105	21	18	18	21	22	22	19.5	14.7	16.4	16.9	19.6	17.4	8.72271	8.55179	8.23505	8.53357	8.26205	8.20088	8.8024	8.63044	8.31687	8.56684
5865	Q9BS40	Latexin	LXN	0.131634	0.225143	0.0935096	no	no	7.6792e-28	1399500000	3	3	2	1	1	2	2	3	2	1	1	2	2	3	16.7	25.75	222	7	5	5	7	6	6	12.2	4.1	4.1	12.2	12.2	16.7	8.42297	8.25962	7.91922	8.6007	8.36554	8.22199	7.89514	7.72229	7.41147	8.37954
4938	Q7Z3C6;Q7Z3C6-2;Q7Z3C6-3;C9JXG2;C9JDK4;C9JKV7;C9IYZ9;C9JX27;F2Z3I6;C9JFV2;C9JS65	Autophagy-related protein 9A	ATG9A	0.1314	-0.123799	-0.255199	no	no	1.3133e-47	683810000	6	6	5	5	6	4	3	4	5	5	6	4	3	4	9.9	94.446	839	10	10	10	8	5	8	8.7	8.1	9.9	6.9	5.7	6.9	8.19676	7.9688	7.80781	7.87403	7.55387	7.59132	8.24908	8.03683	7.83631	8.0545
588	Q96GW9;B4DVV7	Methionine--tRNA ligase, mitochondrial	MARS2	0.131396	0.344799	0.213404	no	no	3.2224e-11	92906000	3	3	2	2	1	2	2	3	2	2	1	2	2	3	6.1	66.59	593	2	2	1	2	3	4	4.2	4.2	2.4	4.2	4.2	6.1	7.34904	7.22376	6.74806	6.92473	6.66072	6.58322	7.11022	6.96976	6.55162	7.27492
1037	P08962;C9JV86;F8VWK8;F8W022;Q8N6Z9;F8VZE2;F8VV56;F8VNT9	CD63 antigen	CD63	0.131382	-0.353323	-0.484705	no	no	3.7722e-37	9173400000	4	4	4	4	4	4	4	4	4	4	4	4	4	4	13.4	25.636	238	13	13	10	9	11	9	13.4	13.4	13.4	13.4	13.4	13.4	9.06852	8.82932	8.69539	9.29482	8.99713	8.99043	9.14032	8.90099	8.76737	9.14076
5651	Q96JM7;Q96JM7-2;E9PLL7	Lethal(3)malignant brain tumor-like protein 3	L3MBTL3	0.131244	-0.00848689	-0.139731	no	no	1.2562e-109	794030000	7	7	7	7	7	7	7	7	7	7	7	7	7	7	11.5	88.336	780	17	13	16	15	16	12	11.5	11.5	11.5	11.5	11.5	11.5	8.09871	7.8864	7.68602	7.89746	7.63229	7.55735	8.30563	8.07525	7.92017	8.24988
4181	Q13136;Q13136-2;F5H1G2;E9PJZ7;H0YEF9;E9PPF6;H0YFQ4;F8VP68;B7ZKZ5;Q2M3G8;B3KXA0;G3V200;B7Z663;E7ETG6;H0YHK3;F8VWR9;E9PID5	Liprin-alpha-1	PPFIA1	0.131069	-0.0476779	-0.178747	no	no	1.0336e-38	504830000	8	7	6	7	5	4	6	7	5	6	5	4	5	6	6.8	135.78	1202	13	14	11	10	14	15	4.7	6	3.7	2.2	4.7	5.6	7.80798	7.6144	7.36386	7.90909	7.62122	7.59448	7.89034	7.6763	7.48044	7.91908
4831	Q6PCB5;Q6PCB5-2;C9JM20	Round spermatid basic protein 1-like protein	RSBN1L	0.130941	-0.0011136	-0.132055	no	no	1.4281e-13	295240000	5	5	1	2	4	1	4	4	1	2	4	1	4	4	12.3	94.868	846	1	2	6	1	6	4	1.5	4	9.8	1.5	11	11	6.44056	6.15385	6.12473	7.59535	7.34533	7.23651	7.89274	7.6737	7.49055	7.04774
5483	Q92990;B4DJ85;Q92990-2	Glomulin	GLMN	0.130929	-0.155361	-0.28629	no	no	3.3049e-55	1021500000	10	10	6	8	4	7	6	5	6	8	4	7	6	5	23.4	68.207	594	9	10	7	10	9	7	14.5	18.7	11.3	15.8	14.5	14.1	8.16474	7.95976	7.74022	8.30324	8.03977	7.96108	8.23142	8.03695	7.78888	8.17733
1989	O14678;F8W7M4;H0YJ78	ATP-binding cassette sub-family D member 4	ABCD4	0.130922	0.202207	0.0712848	no	no	1.2198e-08	186150000	2	2	1	1	2	2	2	1	1	1	2	2	2	1	6.9	68.597	606	3	3	4	6	5	3	2.1	2.1	6.9	6.9	6.9	2.1	6.96654	6.76992	6.52778	6.69031	6.45423	6.31288	7.68408	7.47094	7.27275	7.73997
1494	Q9NTJ3;E9PD53;Q9NTJ3-2;F5H0U7;C9JR83;E7ET04;C9J9E4;C9JJ64;C9IYK2;C9JWF0;C9J578;C9JVD8	Structural maintenance of chromosomes protein 4;Structural maintenance of chromosomes protein	SMC4	0.130904	-0.0972063	-0.228111	no	no	3.3485e-242	10656000000	28	28	23	22	21	20	21	22	23	22	21	20	21	22	23.4	147.18	1288	69	73	59	72	70	56	19.2	18.6	17.9	18.2	18.7	18.9	9.3088	9.07379	8.92986	9.10863	8.82244	8.79222	9.26316	9.0381	8.86999	9.27089
2792	O95714;Q9BVR0;E7EMG2	E3 ubiquitin-protein ligase HERC2	HERC2	0.130339	0.191458	0.0611195	no	no	9.6728e-104	376030000	14	14	8	7	3	6	9	9	8	7	3	6	9	9	5	527.22	4834	8	11	2	6	11	10	3	2.7	0.9	2.5	2.9	2.8	7.61398	7.42005	7.17047	7.79144	7.56267	7.40367	7.14529	6.99015	6.62297	7.81863
2306	O00401	Neural Wiskott-Aldrich syndrome protein	WASL	0.130322	-0.103934	-0.234256	no	no	3.9724e-33	1240500000	6	6	3	4	4	4	4	5	3	4	4	4	4	5	16.2	54.826	505	6	9	8	7	7	8	13.1	13.1	14.7	13.1	13.1	14.7	8.33049	8.13764	7.88503	8.28832	8.02189	7.94968	8.37018	8.13972	7.98481	8.33122
3440	P36871;F5H857;P36871-2;B4DPV0	Phosphoglucomutase-1	PGM1	0.12999	-0.183836	-0.313826	no	no	5.9427e-176	8364600000	20	20	18	18	18	17	17	16	18	18	18	17	17	16	48.8	61.448	562	53	57	56	54	60	52	39.1	39.1	39.1	42.5	37.7	32.7	9.08568	8.86664	8.68348	9.1012	8.83511	8.7622	9.22552	9.01157	8.81541	9.09367
4763	Q68CQ7;E7EMX8	Glycosyltransferase 8 domain-containing protein 1	GLT8D1	0.129858	-0.300534	-0.430392	no	no	1.4961e-17	790160000	3	3	3	3	3	1	3	3	3	3	3	1	3	3	7	41.935	371	8	7	6	4	5	8	7	7	7	2.7	7	7	8.30554	8.09262	7.89388	8.05173	7.75005	7.75132	8.19273	7.9591	7.81189	7.79415
2272	Q92930;H0YNE9;F5GY21;H0YMN7	Ras-related protein Rab-8B	RAB8B	0.129858	0.114972	-0.0148855	no	no	6.2053e-26	263110000	7	3	6	7	6	5	5	6	2	3	2	1	1	2	26.6	23.584	207	2	3	2	2	1	2	26.1	26.6	26.1	22.7	22.7	26.1	7.52804	7.33349	7.08565	7.78928	7.51886	7.45533	7.54736	7.33588	7.13335	7.68783
6459	Q9NZ32;F5H5L9;F6S9Y6;G3V5Y4;H0YJR3;G3V2Q5;G3V524;H0YJD9;G3V4K6;H0YJE8	Actin-related protein 10	ACTR10	0.129801	-0.0490732	-0.178874	no	no	3.816e-92	3593100000	9	9	7	6	6	8	8	6	7	6	6	8	8	6	33.3	46.306	417	11	15	13	17	16	13	26.6	19.4	24.9	31.4	28.5	24.7	8.68702	8.47283	8.27733	8.69779	8.41956	8.37269	8.75696	8.52086	8.37956	8.80851
4104	Q08AE8;Q08AE8-2;Q08AE8-3;Q08AE8-4;C9JYR7	Protein spire homolog 1	SPIRE1	0.129646	0.118602	-0.0110441	no	no	1.5753e-40	365890000	4	4	3	3	4	3	3	1	3	3	4	3	3	1	4.4	85.553	756	3	4	4	3	3	1	3.2	3.2	4.4	3.2	3.2	2.4	7.89995	7.77349	7.30242	7.77759	7.62844	7.24095	7.96477	7.82079	7.41527	7.86086
6431	Q9NXH9;Q9NXH9-2	tRNA (guanine(26)-N(2))-dimethyltransferase	TRMT1	0.129533	0.0999738	-0.0295589	no	no	2.0224e-25	494700000	6	6	3	2	4	4	4	2	3	2	4	4	4	2	12.4	72.233	659	3	3	2	5	4	2	7.3	2.7	7.4	7.3	7.7	3	7.76732	7.45355	7.47868	8.02399	7.76967	7.67062	7.58202	7.38847	7.13783	8.06815
1633	Q96K76;E9PM46;Q96K76-2;F5H2J6;Q96K76-3;F5H2L6;E9PQC0	Ubiquitin carboxyl-terminal hydrolase 47;Ubiquitin carboxyl-terminal hydrolase	USP47	0.1294	0.208878	0.0794781	no	no	0	6725800000	25	25	21	21	16	17	18	20	21	21	16	17	18	20	26.1	157.31	1375	47	50	39	47	46	52	22.1	22.5	17	18.6	19.8	22	9.00659	8.84218	8.50518	8.92622	8.69767	8.53816	9.08867	8.92764	8.5798	9.13001
6232	Q9HD45;Q5TB53	Transmembrane 9 superfamily member 3	TM9SF3;RP11-34E5.1	0.129296	0.273465	0.14417	no	no	1.0993e-150	14597000000	17	17	15	14	15	16	15	14	15	14	15	16	15	14	21.6	67.887	589	41	51	47	48	40	42	18.7	18.7	18.7	21.6	20.4	18.5	9.34596	9.1304	8.93842	9.3686	9.11474	9.01469	9.45076	9.26933	8.98412	9.48865
1255	Q53H47;E7EN68;B9ZVV8	Histone-lysine N-methyltransferase SETMAR;Histone-lysine N-methyltransferase;Mariner transposase Hsmar1	SETMAR	0.128546	0.182115	0.0535687	no	no	1.3714e-18	181760000	4	4	2	3	3	2	4	3	2	3	3	2	4	3	8	76.668	671	5	6	5	5	6	5	1.9	6	6	1.9	8	6	7.40634	7.21958	6.94977	7.24662	6.99701	6.88725	7.61903	7.43255	7.16194	7.42823
2588	O75044;H0Y2P8;H0Y4C3;Q5VZB4;E9PDX4;H0Y582	SLIT-ROBO Rho GTPase-activating protein 2	SRGAP2	0.128145	-0.0669503	-0.195096	no	no	1.7271e-199	2449500000	12	11	11	10	9	9	12	11	10	9	8	8	11	10	19.2	120.88	1071	15	15	11	17	18	13	18.3	15	12.1	16.3	19.2	16	8.53602	8.34114	8.09416	8.50676	8.25093	8.15528	8.58272	8.38782	8.14095	8.70889
2182	H0Y3H1;Q9H0E2;E7EN89;F2Z2Y8;B3KR28;B3KXC6;E9PQ25;E9PP67;E9PNS3	Toll-interacting protein	TOLLIP	0.128112	0.00298957	-0.125122	no	no	8.429e-18	818790000	7	7	3	6	3	3	6	5	3	6	3	3	6	5	20.2	38.894	352	3	8	4	4	8	6	7.7	20.2	7.7	12.2	17.9	11.4	7.77443	7.58607	7.32085	8.31649	8.02015	8.01077	7.73726	7.55778	7.26684	8.00647
950	P09110;C9JDE9;G5E935;F5GXL8;H0Y4D4;B4DVF4;F2Z3P7;F2Z2Q6;B4E072	3-ketoacyl-CoA thiolase, peroxisomal	ACAA1	0.12809	0.107322	-0.0207689	no	no	4.3283e-47	1442900000	8	8	6	5	6	7	7	5	6	5	6	7	7	5	32.3	44.292	424	7	6	7	10	8	7	21.2	18.2	23.8	24.8	24.8	18.2	8.25698	8.06908	7.80255	8.27983	8.03326	7.91652	8.21077	8.01833	7.76458	8.4257
731	P49902;B7Z382;Q5JUV4;E9PHF2;Q5JUV3;Q5JUV6;H0YHR8	Cytosolic purine 5-nucleotidase	NT5C2	0.128007	-0.219091	-0.347099	no	no	2.6809e-125	4375400000	11	11	9	9	9	10	9	9	9	9	9	10	9	9	24.6	64.969	561	24	28	23	31	27	28	19.3	21.6	19.3	22.3	19.3	19.3	8.70964	8.50311	8.28767	8.7838	8.49094	8.47443	8.90297	8.69038	8.49076	8.93225
2205	Q92547;H0Y8I7	DNA topoisomerase 2-binding protein 1	TOPBP1	0.12774	0.261092	0.133352	no	no	2.6026e-05	55024000	1	1	1	1	1	1	1	1	1	1	1	1	1	1	0.7	170.68	1522	1	4	2	2	2	1	0.7	0.7	0.7	0.7	0.7	0.7	6.69839	6.52373	6.21835	7.24065	6.95353	6.92525	7.07577	6.912	6.57285	6.84856
1182	Q8N264;Q8N264-2;Q8N264-3;D6RCP5;Q8N264-4;D6RBC2	Rho GTPase-activating protein 24	ARHGAP24	0.127737	-0.049352	-0.177089	no	no	2.4694e-85	1591900000	13	13	9	10	11	9	7	5	9	10	11	9	7	5	25.8	84.257	748	15	17	13	18	12	9	20.5	21.7	24.3	21.3	16	10.3	8.47084	8.27825	8.02498	8.40642	8.11531	8.09524	8.52401	8.34007	8.06217	8.56913
3614	P49753;Q86TX2;G3V4F2;P49753-2;B3KSA0	Acyl-coenzyme A thioesterase 2, mitochondrial;Acyl-coenzyme A thioesterase 1	ACOT2;ACOT1	0.127602	-1.13291	-1.26051	no	no	1.3657e-23	681430000	4	4	4	4	2	2	4	3	4	4	2	2	4	3	12.2	53.218	483	5	4	3	3	4	3	12.2	12.2	5.8	7.7	12.2	9.9	8.05373	7.71848	7.78442	8.15259	7.67175	7.97834	7.98293	7.6489	7.71257	8.02115
6377	Q9NVU0;B4DL24;Q9NVU0-2;Q9NVU0-3	DNA-directed RNA polymerase III subunit RPC5	POLR3E	0.127305	-0.228726	-0.356031	no	no	2.4565e-62	833640000	6	6	2	5	4	3	5	5	2	5	4	3	5	5	17.1	79.897	708	4	11	7	7	12	9	4.5	15	12.7	6.8	12.3	15	7.99378	7.81679	7.51843	8.36493	8.04747	8.07969	7.69076	7.46195	7.30307	8.06513
6458	Q9NZ09;Q9NZ09-2;F5GXE2;F5H0J8	Ubiquitin-associated protein 1	UBAP1	0.12725	0.0501439	-0.0771063	no	no	1.4754e-16	367380000	7	7	3	3	3	3	4	3	3	3	3	3	4	3	15.7	55.083	502	4	4	2	4	4	4	9.6	9.8	8	7.8	11.6	9.8	7.79562	7.64483	7.263	7.66229	7.37921	7.34254	7.28995	7.07441	6.88237	8.09961
4231	Q13501;Q13501-2;E7EMC7;E7ERP8;E9PFW8;C9JRJ8;E3W990	Sequestosome-1	SQSTM1	0.127205	-0.665484	-0.792689	no	no	0	11743000000	13	13	12	10	12	11	11	11	12	10	12	11	11	11	49.8	47.687	440	33	28	32	30	24	26	49.5	34.8	49.5	46.8	42.5	35	9.21229	8.92909	8.89266	9.12031	8.78074	8.85469	9.42975	9.12633	9.13111	9.4186
1435	P27986;P27986-2;P27986-3;E7EX19;P27986-4;F6TDL0;Q92569;Q92569-2;E7EMU8;Q92569-3;Q5T4P3;H0YBC2;E5RJY0	Phosphatidylinositol 3-kinase regulatory subunit alpha	PIK3R1	0.127133	-0.425245	-0.552377	no	no	7.7547e-36	447480000	7	7	4	3	2	3	4	5	4	3	2	3	4	5	10.9	83.597	724	6	5	3	5	6	8	8.8	4.8	5.1	5.1	9	6.8	7.80551	7.55222	7.45083	7.77616	7.48924	7.46055	7.80155	7.52392	7.47579	8.07773
5245	Q8ND71	GTPase IMAP family member 8	GIMAP8	0.126381	-3.26139	-3.38778	no	no	6.8493e-196	1120000000	10	10	5	5	6	4	8	5	5	5	6	4	8	5	17.3	74.889	665	5	8	9	4	7	8	8.1	8.9	9.8	6.5	13.2	8.9	8.02702	7.0639	7.97698	8.25263	7.15664	8.21632	8.42215	7.49938	8.36689	7.92441
2310	O00425;O00425-2;F8WD15	Insulin-like growth factor 2 mRNA-binding protein 3	IGF2BP3	0.126377	-0.353888	-0.480265	no	no	2.2436e-218	18893000000	29	26	25	25	24	22	24	22	22	22	21	19	21	20	51.8	63.704	579	60	69	66	71	67	58	45.4	45.4	41.1	41.3	48	42.5	9.48728	9.25978	9.09767	9.40085	9.08966	9.10978	9.42846	9.20815	9.02821	9.60543
2415	O15145;B4DM63;C9JZD1;F8VR50	Actin-related protein 2/3 complex subunit 3	ARPC3	0.126298	0.107663	-0.0186342	no	no	6.1656e-114	15153000000	9	9	8	8	8	8	9	8	8	8	8	8	9	8	57.3	20.546	178	38	37	43	29	39	40	53.4	53.4	53.4	53.4	57.3	53.4	9.33209	9.14351	8.87888	9.39541	9.15752	9.02049	9.40782	9.22686	8.94027	9.45231
3300	P27448-7;P27448;P27448-2;P27448-4;P27448-3;P27448-6;Q86TT8;H0YIY6;Q9P0L2;H0YNV4;H0YKJ3;E9PHX2	MAP/microtubule affinity-regulating kinase 3	MARK3	0.126218	-0.333424	-0.459641	no	no	7.605e-27	507680000	8	6	4	4	4	3	4	6	2	4	3	2	3	5	13.3	85.44	760	4	4	2	4	4	8	7.8	8	7.5	6.6	6.6	10.4	7.4292	7.11783	7.13827	7.72256	7.43252	7.41027	7.70657	7.53771	7.21463	8.12538
2037	P11166;F8WC15;G8JLF4;C9JIM8	Solute carrier family 2, facilitated glucose transporter member 1	SLC2A1	0.125865	-0.179766	-0.305631	no	no	4.189e-09	363290000	3	3	2	3	2	2	2	1	2	3	2	2	2	1	8.5	54.083	492	2	3	2	2	2	1	6.9	8.5	6.9	3.7	6.9	2	7.88275	7.68107	7.45271	7.93319	7.61853	7.64537	7.81113	7.5548	7.46024	7.50009
1781	P11182;F5H1F9;Q5VVL7	Lipoamide acyltransferase component of branched-chain alpha-keto acid dehydrogenase complex, mitochondrial	DBT	0.125833	-0.254231	-0.380064	no	no	2.9e-16	1119900000	3	3	2	2	3	2	2	2	2	2	3	2	2	2	8.9	53.486	482	9	7	10	8	8	8	6	6	8.9	6	6	6	8.19819	7.9842	7.7882	8.29044	8.00035	7.97816	8.37599	8.15552	7.97601	8.25578
6821	Q9Y2X0;Q9Y2X0-3;Q9Y2X0-2;Q9Y2X0-4;E7ETV0;Q9Y2X0-5;B9TWZ6;F5H5L7;F5H087;F5H0Q2;B9TX01	Mediator of RNA polymerase II transcription subunit 16	MED16	0.125676	0.314912	0.189236	no	no	9.5492e-23	258700000	5	5	3	3	2	3	4	3	3	3	2	3	4	3	7.9	96.792	877	3	3	2	3	5	3	4.2	4.2	2.2	5.4	5.8	4.2	7.52637	7.38954	6.95813	7.43379	7.2413	6.98771	7.56078	7.41054	7.02686	7.72713
407	O75027-2;O75027;G3V1J3;G3XAC4;B4DGL8	ATP-binding cassette sub-family B member 7, mitochondrial	ABCB7	0.125597	-0.129481	-0.255078	no	no	1.4552e-37	339010000	5	5	3	3	3	1	2	3	3	3	3	1	2	3	8.2	82.768	753	4	4	3	2	2	5	4.6	5.7	5.8	2.7	4	5.2	7.66807	7.41772	7.30967	8.10565	7.86506	7.73441	7.7298	7.49435	7.35151	7.26307
3572	P48509;E9PMR4;E9PL82;E9PRJ3;E9PI15;E9PLZ6;E9PJC8	CD151 antigen	CD151	0.12544	0.339144	0.213705	no	no	6.9623e-74	8169200000	6	6	5	5	4	4	5	4	5	5	4	4	5	4	29.6	28.295	253	24	24	24	29	28	24	26.5	26.5	23.3	23.3	26.5	23.3	9.093	8.93133	8.58547	9.15824	8.96605	8.71166	9.14591	9.00264	8.59458	9.04301
4740	Q5VY93;Q92974;Q92974-2;Q92974-3;B7Z977;F5H3H5	Rho guanine nucleotide exchange factor 2	ARHGEF2	0.125401	0.108192	-0.0172093	no	no	2.3785e-209	6878400000	23	23	15	16	14	15	16	18	15	16	14	15	16	18	31.7	111.49	987	24	27	24	22	33	31	20.9	23.4	20	21.6	24.8	25.9	8.91352	8.71444	8.47903	9.02193	8.74994	8.68982	8.93173	8.76902	8.42654	8.91837
1289	Q8WYP3-2;Q8WYP3;E7EPJ1	Ras and Rab interactor 2	RIN2	0.125304	-0.566766	-0.69207	no	no	1.239e-43	165870000	2	2	2	2	2	2	2	2	2	2	2	2	2	2	3.3	105.61	944	4	6	3	5	7	6	3.3	3.3	3.3	3.3	3.3	3.3	7.26658	6.98046	6.95012	7.3002	6.85678	7.10626	7.59519	7.33999	7.24291	7.29017
2448	O15460-2;O15460;E7EPI9;E7ENX0;E7ERI1;A8MXE0;C9JX45;C9JCP0;C9JIG4;C9JN43	Prolyl 4-hydroxylase subunit alpha-2	P4HA2	0.125285	0.171044	0.045759	no	no	5.1473e-162	10630000000	13	13	11	13	10	10	12	12	11	13	10	10	12	12	30.6	60.632	533	29	27	24	26	27	24	27.4	30.6	27.2	27.2	29.1	28.7	9.22958	9.05671	8.74596	9.15857	8.92602	8.77622	9.29778	9.11985	8.82432	9.32824
2606	O75170;O75170-5;O75170-3;O75170-4;O75170-2;O75170-6;B3KMJ7;F2Z3M7	Serine/threonine-protein phosphatase 6 regulatory subunit 2	PPP6R2	0.125188	0.126329	0.00114014	no	no	1.3364e-07	189300000	3	3	2	2	3	1	2	2	2	2	3	1	2	2	4.7	104.94	966	3	2	4	2	2	2	3.5	3.5	4.7	2.8	3.9	3.9	7.5368	7.37007	7.04036	7.27328	7.03214	6.90276	7.60691	7.42506	7.14107	7.75724
3486	P41250;F8WCK4	Glycine--tRNA ligase	GARS	0.125125	0.115347	-0.00977716	no	no	0	34221000000	36	36	24	31	27	26	27	29	24	31	27	26	27	29	54.9	83.165	739	96	108	102	105	112	106	36.4	44.2	42.1	39.4	40.9	43.3	9.64315	9.46294	9.17415	9.73666	9.48923	9.37447	9.76689	9.58091	9.30888	9.76887
6375	Q9NVR2;H0YBW3;H0YB36;H0YC09	Integrator complex subunit 10	INTS10	0.125115	-0.173895	-0.29901	no	no	2.5887e-08	156930000	3	3	1	2	1	2	3	2	1	2	1	2	3	2	4.9	82.235	710	2	3	2	3	6	3	1.7	3	1.7	3	4.9	3	7.18986	6.98982	6.75703	7.48367	7.23426	7.12405	7.10565	6.83118	6.77629	7.33516
6681	Q9UL54-2;Q9UL54;B7ZM88;E7EV72;Q9UL54-3	Serine/threonine-protein kinase TAO2	TAOK2	0.125108	-0.324004	-0.449112	no	no	1.6261e-46	776760000	7	7	3	2	2	3	3	6	3	2	2	3	3	6	11.3	119.28	1049	4	3	3	4	4	5	5.7	4.5	4.5	5.7	5.7	10.1	7.75853	7.52458	7.37814	7.42684	7.11584	7.13551	7.99187	7.77597	7.58485	8.20534
369	Q66PJ3;Q66PJ3-2;Q66PJ3-3;Q66PJ3-4;F8WCT1;B3V0L1;F5GYV5;F5H7X4;Q66PJ3-5;F8WEP2	ADP-ribosylation factor-like protein 6-interacting protein 4	ARL6IP4	0.125005	0.0652345	-0.0597706	no	no	1.2104e-33	215570000	4	4	1	3	2	2	2	3	1	3	2	2	2	3	13.9	38.395	360	2	7	4	4	4	6	4.4	13.9	7.8	7.8	7.8	13.1	7.00638	6.80647	6.57327	7.77165	7.49472	7.44509	7.19951	7.01486	6.73895	7.17126
212	A8MX09;O94967-3;O94967;O94967-2	WD repeat-containing protein 47	WDR47	0.124856	0.438503	0.313646	no	no	5.1416e-26	435990000	3	3	3	3	3	3	3	1	3	3	3	3	3	1	4.5	102.94	927	6	6	6	5	6	1	4.5	4.5	4.5	4.5	4.5	1.2	7.95488	7.79121	7.45179	7.92045	7.71815	7.49142	8.00706	7.87704	7.41987	7.88844
2278	O00124;O00124-3	UBX domain-containing protein 8	UBXN8	0.124814	0.91997	0.795156	no	no	9.9673e-08	137160000	1	1	1	1	1	1	1	1	1	1	1	1	1	1	3.7	30.541	270	2	2	2	2	1	3	3.7	3.7	3.7	3.7	3.7	3.7	7.37273	7.26512	6.71409	7.39841	7.17898	6.99682	7.38484	7.27962	6.71758	7.25926
698	Q8WXG6-2;Q8WXG6-3;Q8WXG6-4;Q8WXG6-5;B5MEE5;F8W9P9;Q8WXG6-6;Q8WXG6;Q8WXG6-7;F8W8U2	MAP kinase-activating death domain protein	MADD	0.124507	0.0421839	-0.0823227	no	no	7.5205e-06	616070000	2	2	2	1	2	2	2	1	2	1	2	2	2	1	1.1	178.56	1608	3	1	2	3	4	1	1.1	0.6	1.1	1.1	1.1	0.6	8.2206	8.04068	7.75106	7.4078	7.05729	7.15119	8.14965	7.95524	7.70697	7.96033
2704	O94804;H0YB71	Serine/threonine-protein kinase 10	STK10	0.124066	-0.375512	-0.499578	no	no	3.3539e-87	3563300000	11	10	10	10	9	9	11	10	9	9	8	9	10	10	12.9	112.13	968	28	29	27	31	31	30	11.7	12.1	9	10.7	12.9	12	8.70522	8.49203	8.29396	8.73008	8.44665	8.41071	8.88342	8.63089	8.52778	8.66841
297	Q4V328;F5H504;Q4V328-4;B1B0M1;Q4V328-2;Q4V328-3	GRIP1-associated protein 1	GRIPAP1	0.123955	0.100345	-0.0236102	no	no	4.8215e-67	633950000	9	9	5	4	6	7	6	5	5	4	6	7	6	5	13.8	95.988	841	12	9	12	11	13	13	6.5	7.6	11.2	12	9.3	6.8	8.07525	7.87895	7.63593	7.80922	7.55745	7.45261	8.1422	7.97455	7.64773	8.09405
4741	Q5VYK3;B3KXF2;Q5VYK5	Proteasome-associated protein ECM29 homolog	ECM29;KIAA0368	0.123663	-0.260387	-0.38405	no	no	0	10551000000	42	42	31	33	29	38	32	30	31	33	29	38	32	30	30.2	204.29	1845	53	63	56	63	55	63	21.1	24.1	20.1	26.4	22.7	20.1	9.06737	8.84757	8.6663	9.3175	9.00753	9.02526	9.18927	8.98372	8.7657	9.22536
6336	Q9NUI1;Q4VXZ8;Q9NUI1-3;Q9NUI1-2;G3V0I9;G8JLH8	Peroxisomal 2,4-dienoyl-CoA reductase	DECR2	0.123621	0.201941	0.0783199	no	no	8.947e-44	875370000	8	8	6	4	4	4	4	3	6	4	4	4	4	3	30.1	30.777	292	7	4	3	6	5	4	24	15.1	16.1	16.8	16.8	11.6	8.19797	8.01452	7.73518	8.105	7.87967	7.71223	8.14513	7.78764	7.89406	8.17126
5156	Q8N1G4	Leucine-rich repeat-containing protein 47	LRRC47	0.123308	-0.0705267	-0.193835	no	no	3.1557e-111	6457300000	17	17	14	14	12	15	12	16	14	14	12	15	12	16	33.4	63.472	583	21	32	19	32	23	33	26.2	26.8	22.8	29	25.6	31.4	8.83916	8.63265	8.41716	9.14523	8.88947	8.79365	8.78805	8.60881	8.31714	8.90713
5434	Q92572;F5H459	AP-3 complex subunit sigma-1	AP3S1	0.123282	0.204316	0.0810338	no	no	7.9276e-26	1146300000	5	5	4	4	4	3	3	4	4	4	4	3	3	4	32.6	21.732	193	5	5	5	3	5	6	27.5	28	28	22.8	22.8	28	8.22827	8.05296	7.74956	8.42583	8.19967	8.03427	8.34015	8.12172	7.93702	8.05831
3494	P42224;P42224-2;D2KFR9;E7EPD2;E7ENM1;E9PH66;H0YG89	Signal transducer and activator of transcription 1-alpha/beta	STAT1	0.123261	0.390566	0.267305	no	no	0	29526000000	28	28	26	23	23	24	22	24	26	23	23	24	22	24	39.7	87.334	750	81	82	78	76	76	82	36.5	35.2	37.6	36.8	33.3	37.7	9.63695	9.48835	9.09899	9.70446	9.5044	9.27166	9.74458	9.59666	9.20496	9.66448
6180	Q9H9A6	Leucine-rich repeat-containing protein 40	LRRC40	0.123012	-0.273695	-0.396707	no	no	2.5844e-104	6638100000	15	15	12	12	13	14	12	13	12	12	13	14	12	13	29.9	68.249	602	28	30	26	25	29	31	25.2	25.2	26.6	28.2	24.9	26.6	8.98517	8.79071	8.54258	9.08322	8.86659	8.67732	8.92989	8.7337	8.49038	8.97107
2955	P08236;P08236-2;E9PCV0;F2Z3L6;F8WBK6;F8WE77	Beta-glucuronidase	GUSB	0.122835	-0.468844	-0.591679	no	no	7.5043e-56	939970000	9	9	3	5	4	8	4	3	3	5	4	8	4	3	21.2	74.731	651	9	11	10	16	12	9	5.5	9.2	8	18.9	6.9	6.9	7.97431	7.70935	7.63394	7.99831	7.6216	7.7617	8.13843	7.8695	7.80271	8.31228
6378	Q9NVV0	Trimeric intracellular cation channel type B	TMEM38B	0.122784	-0.413269	-0.536053	no	no	2.9112e-07	457160000	1	1	1	1	1	1	1	1	1	1	1	1	1	1	4.1	32.509	291	3	3	2	3	3	2	4.1	4.1	4.1	4.1	4.1	4.1	7.81397	7.57364	7.44237	7.49566	7.19114	7.19808	8.0703	7.83389	7.69327	8.12908
6362	Q9NVE7;E9PHT6;H0YA26;H0Y9E4;H0YA31	Pantothenate kinase 4	PANK4	0.122762	-0.425674	-0.548437	no	no	2.4426e-148	2305800000	17	17	10	15	11	10	10	9	10	15	11	10	10	9	35.7	85.99	773	21	26	21	19	20	19	18.5	28.7	23.2	20.2	17.9	18.5	8.46049	8.20895	8.10356	8.60957	8.29097	8.32543	8.63814	8.3894	8.27766	8.59784
695	B5ME97;Q9P0V9-2;E7EX04;Q9P0V9;E7EW69;Q9P0V9-3;B7Z371;B7Z277;E9PBL4	Septin-10	2010-09-01	0.122647	-0.546561	-0.669208	no	no	5.9195e-104	1968800000	7	6	6	6	6	6	6	4	5	5	5	5	5	3	17.6	62.944	544	12	11	14	12	11	10	15.4	15.4	15.4	15.4	16.2	10.5	8.51419	8.25254	8.16985	8.50911	8.14495	8.26319	8.63662	8.35917	8.31065	8.4558
6350	Q9NUS5	AP-5 complex subunit sigma-1	AP5S1	0.122604	0.0742284	-0.0483758	no	no	4.89e-16	204290000	1	1	1	1	1	1	1	1	1	1	1	1	1	1	10	22.522	200	3	2	2	3	3	3	10	10	10	10	10	10	7.42366	7.24055	6.96021	7.29403	7.06408	6.90792	7.42063	7.249	6.93445	7.52312
6209	Q9HBH5;C9J2C7	Retinol dehydrogenase 14	RDH14	0.122542	-0.141694	-0.264236	no	no	1.1162e-29	1047200000	6	6	3	4	2	3	4	3	3	4	2	3	4	3	28.9	36.864	336	8	6	4	8	7	5	14	21.4	8.9	17.6	16.4	12.8	8.2414	8.04395	7.80408	8.23295	7.95644	7.90595	8.19673	7.95143	7.83174	8.28551
1576	F2Z2Q3;Q8TAG9;E9PHI3;E7EW84;F2Z3K0;B1AP46	Exocyst complex component 6	EXOC6	0.122411	-0.191184	-0.313594	no	no	1.4545e-76	1208000000	11	10	8	9	7	7	7	6	7	8	6	6	6	5	17.6	95.335	820	15	14	13	10	14	12	13	13.9	12.1	12	12.1	10.6	8.22526	8.03254	7.77962	8.37123	8.09482	8.04411	8.36853	8.16912	7.93461	8.21851
1654	E9PQA6;Q96EY5;Q96EY5-3;Q96EY5-2;E9PJW8;E9PPW1;E9PLZ8;E9PLL0	Multivesicular body subunit 12A	FAM125A	0.122395	-0.198494	-0.320889	no	no	2.2339e-35	239740000	3	3	1	2	2	2	2	3	1	2	2	2	2	3	20.9	28.703	273	2	5	4	2	4	4	9.9	14.3	14.3	14.3	14.3	20.9	7.26795	6.9482	6.98487	7.87894	7.58495	7.57074	7.52038	7.2733	7.15776	7.3388
1921	Q6PJG2;F6RU81	Uncharacterized protein C14orf43	C14orf43	0.122356	0.0960516	-0.0263043	no	no	6.2018e-43	362340000	4	4	4	2	2	3	2	3	4	2	2	3	2	3	7.8	114.99	1045	4	2	2	3	3	3	7.8	4.2	4.2	5.5	4.2	5.5	7.83906	7.65985	7.36812	7.39452	7.16507	7.00775	7.82194	7.64695	7.3426	7.90614
4616	Q5J8M3;Q5J8M3-2;Q5J8M3-3;H0YNK8;H0YNK0;H0YK61;H0YLP8;H0YLG4	ER membrane protein complex subunit 4	EMC4	0.122195	0.0582777	-0.0639171	no	no	2.7609e-25	366770000	4	3	2	2	3	2	1	2	1	1	2	2	1	1	32.8	20.086	183	2	2	3	3	2	3	15.8	15.8	20.2	21.3	8.7	15.8	7.69376	7.4764	7.28901	7.72861	7.49459	7.34832	7.77561	7.57277	7.34753	7.77787
3442	P36915;E9PHP0;E7ENK5;B4DWZ0;P36915-2;E7ETJ1;B0V0L0;A2AB27;A8MPZ0	Guanine nucleotide-binding protein-like 1	GNL1	0.122145	0.421225	0.299081	no	no	7.7187e-64	3550800000	12	12	12	10	9	9	10	7	12	10	9	9	10	7	22.4	68.66	607	23	21	24	18	20	21	22.4	17.6	18.1	18.3	19.4	13.3	8.74774	8.56958	8.27471	8.7429	8.49779	8.37767	8.90326	8.68908	8.49356	8.65846
3118	P16083;Q5TD07;Q59EN2;Q5TD05	Ribosyldihydronicotinamide dehydrogenase [quinone]	NQO2	0.121937	-1.50777	-1.62971	no	no	1.2784e-46	685510000	3	3	3	2	2	2	3	3	3	2	2	2	3	3	28.1	25.918	231	6	5	5	7	6	5	28.1	20.3	19.5	19.5	28.1	28.1	8.01334	7.55895	7.82543	7.80013	7.28547	7.64165	8.14851	7.72373	7.94367	8.08959
5775	Q99543;Q99543-2;F5H621;C9IZ83;F2Z3N9;F2Z3H0	DnaJ homolog subfamily C member 2	DNAJC2	0.121884	0.295659	0.173775	no	no	2.1236e-90	2114000000	15	15	13	12	10	11	14	11	13	12	10	11	14	11	29.8	71.996	621	22	22	17	21	24	22	25.9	24.8	18	25.3	28.2	23.3	8.43681	8.27379	7.93235	8.51143	8.29986	8.0976	8.55051	8.37075	8.08063	8.59856
5570	Q96DX4	RING finger and SPRY domain-containing protein 1	RSPRY1	0.121836	0.108052	-0.0137839	no	no	1.1531e-55	978810000	4	4	4	4	4	4	4	3	4	4	4	4	4	3	13.5	64.18	576	7	5	5	7	6	4	13.5	13.5	13.5	13.5	13.5	10.9	8.32948	8.14214	7.87403	8.01502	7.77668	7.64075	8.25782	8.10295	7.73488	8.27818
400	B4DFT0;Q6PHR2;Q6PHR2-3;Q6PHR2-2	Serine/threonine-protein kinase ULK3	ULK3	0.121717	-0.0190613	-0.140779	no	no	3.7398e-40	236070000	3	3	2	1	1	1	2	2	2	1	1	1	2	2	8.3	54.997	483	3	3	2	2	3	4	6.6	3.3	3.3	3.3	6.6	5	7.47098	7.31679	6.94645	7.66535	7.40205	7.323	7.75023	7.55877	7.30231	7.4971
13	A1X283;G3V144	SH3 and PX domain-containing protein 2B	SH3PXD2B	0.121688	0.036807	-0.0848807	no	no	1.4397e-117	2257500000	12	10	9	7	10	11	9	10	7	6	9	9	7	8	19.1	101.58	911	16	15	15	16	18	18	13.7	12.6	16.8	17.3	14.7	15.9	8.45562	8.23634	8.05385	8.47164	8.2052	8.13303	8.63923	8.44215	8.20126	8.50443
2737	O95140;F5H6V5;A6NLD2;O95140-2	Mitofusin-2	MFN2	0.121665	-0.0261627	-0.147828	no	no	2.0945e-137	2781100000	10	10	7	8	7	8	8	8	7	8	7	8	8	8	16.5	86.401	757	14	23	18	27	23	23	11.9	12.7	11.9	13.1	13.2	13.1	8.41562	8.24366	7.93011	8.58034	8.27907	8.27953	8.67218	8.47359	8.23681	8.62891
5654	Q96JQ0	Protocadherin-16	DCHS1	0.121625	0.939289	0.817664	no	no	1.2959e-41	244080000	6	6	3	3	4	3	5	3	3	3	4	3	5	3	4	346.18	3298	3	3	4	3	4	3	2.5	2.5	3.2	2.2	3.4	2.5	7.57177	7.44484	6.97559	7.32648	7.19022	6.75676	7.94712	7.83175	7.31503	7.47119
3402	P35222;B4DGU4;E7ERS9;E7EMJ5;P35222-2;E7EV28;E9PDF9;C9IZ65	Catenin beta-1	CTNNB1	0.121501	-0.0394191	-0.16092	no	no	0	27235000000	30	25	24	24	25	22	25	26	20	20	21	19	21	22	50.8	85.496	781	64	65	58	60	67	68	41.9	43.4	43.7	39.6	44.9	45.8	9.6064	9.42996	9.12998	9.65926	9.40376	9.30737	9.63926	9.45179	9.18404	9.62489
1943	Q6P3W7;F8VSC5;E7EMM7;F8VPW3	SCY1-like protein 2	SCYL2	0.120991	-0.0959919	-0.216982	no	no	4.4459e-87	1044600000	6	6	5	4	4	4	4	4	5	4	4	4	4	4	10.4	103.71	929	7	5	6	5	6	7	8.8	8.1	8.1	7.8	8.1	8.1	8.12189	7.86747	7.76863	8.19388	7.91104	7.87387	8.25132	8.02453	7.86069	8.30436
621	Q9UJ41;E7ERJ8;Q9UJ41-3;B4DZM7;E9PFK9;Q9UJ41-2;Q3HKR1;E9PHB8;C9JDA2	Rab5 GDP/GTP exchange factor	RABGEF1;KCTD7	0.120787	0.227456	0.106669	no	no	8.7995e-120	697720000	9	9	5	7	5	6	6	7	5	7	5	6	6	7	15.4	79.37	708	8	8	6	8	8	7	10.9	13.1	10.6	11.7	13	12.7	8.04131	7.86475	7.56516	8.12379	7.86385	7.77738	8.09124	7.9017	7.63981	8.09416
631	Q96ET8;C9JYS5;Q9NYZ1;Q96ET8-3;B4E0Q0;C9J2W2;Q96ET8-2;C9JPH1;D6R9A3	Protein FAM18B2;Protein FAM18B1	FAM18B2;FAM18B1;FAM18B2-CDRT4	0.120729	-0.206268	-0.326997	no	no	2.0162e-23	456380000	2	2	2	2	2	2	2	2	2	2	2	2	2	2	6.5	31.104	276	5	7	7	7	7	7	6.5	6.5	6.5	6.5	6.5	6.5	7.64519	7.42747	7.24097	7.72005	7.40724	7.43049	7.99498	7.76278	7.61213	7.94628
3480	P41212;H0YG25	Transcription factor ETV6	ETV6	0.120385	0.205913	0.0855274	no	no	1.8666e-67	380860000	7	7	3	2	3	3	3	5	3	2	3	3	3	5	20.6	52.999	452	4	2	4	4	4	6	11.5	8.6	11.3	11.3	11.3	14.6	7.90827	7.73031	7.43484	7.28805	7.03989	6.9268	7.74417	7.56711	7.26898	7.83586
1561	Q9UGJ0;Q9UGJ0-3;E9PGP6;G8JLM0;Q9UGJ0-2;C9JUG1;F8WDB5	5-AMP-activated protein kinase subunit gamma-2	PRKAG2	0.120328	-0.253626	-0.373954	no	no	7.2153e-54	416930000	4	2	3	3	4	4	2	3	2	2	2	2	2	2	10.5	63.065	569	3	4	4	2	5	4	8.8	9.3	10.5	10.5	7.6	9.3	7.64404	7.42078	7.24822	7.54793	7.26677	7.22611	7.90741	7.66303	7.5412	7.73061
176	P49840;F5H7D7;A8MT37	Glycogen synthase kinase-3 alpha	GSK3A	0.12019	0.0865381	-0.033652	no	no	1.1919e-38	961190000	10	5	7	7	6	5	5	8	4	4	3	2	3	3	21.5	50.98	483	7	8	4	5	7	6	16.6	16.6	13.9	12.6	12.4	16.6	8.23907	8.04155	7.80185	8.24795	7.99471	7.89323	8.02857	7.84769	7.56087	8.11737
2032	F8WBA3;Q15139;A8MYR5	Serine/threonine-protein kinase D1	PRKD1	0.119872	0.160814	0.0409422	no	no	9.4137e-49	244420000	8	3	5	4	4	5	5	6	2	2	2	2	1	2	17.1	102.5	920	3	3	3	4	2	3	12.7	11.8	10.1	12.7	10.1	12	7.65786	7.45849	7.22389	7.39665	7.13175	7.05622	7.90011	7.71903	7.43279	7.60844
1053	C9JYJ4;Q8IUH4;Q8IUH4-3;Q8IUH4-2	Palmitoyltransferase ZDHHC13	ZDHHC13	0.119864	0.398132	0.278269	no	no	1.7127e-38	1506000000	10	10	2	7	3	7	5	5	2	7	3	7	5	5	23.3	70.886	622	2	7	3	8	5	5	5.5	15.8	8	17.2	12.4	10.9	7.78717	7.61045	7.31131	8.70256	8.37044	8.43053	7.87387	7.72955	7.32525	8.46553
1329	E7EQZ4;Q16637;Q16637-3;Q16637-2;Q16637-4;B4DP61;H0YBZ9	Survival motor neuron protein	SMN1;SMN2	0.119776	0.325955	0.206179	no	no	7.8616e-55	1024800000	5	5	4	4	4	4	4	5	4	4	4	4	4	5	23.8	31.689	294	6	4	4	4	5	7	20.4	20.4	20.4	20.4	20.4	23.8	8.1249	7.95683	7.6313	7.9221	7.71127	7.5071	8.22474	8.04999	7.7449	8.3449
200	Q9UMN6;A8MVY7;Q9UMN6-2	Histone-lysine N-methyltransferase MLL4	WBP7	0.119604	-0.017637	-0.137241	no	no	3.2804e-11	164950000	5	5	4	2	2	3	3	3	4	2	2	3	3	3	1.7	293.51	2715	5	4	3	5	4	4	1.4	0.7	0.7	0.9	1	1	7.46553	7.24871	7.05994	6.76206	6.48824	6.43201	6.96211	6.7606	6.53177	6.97444
1252	O95071;E7EMW7;E7ET84;E5RFK7	E3 ubiquitin-protein ligase UBR5	UBR5	0.119596	0.0290139	-0.0905825	no	no	6.3918e-119	857960000	13	13	6	7	6	10	7	7	6	7	6	10	7	7	6.5	309.35	2799	12	13	14	18	14	11	3	3.5	3.2	5.4	3.5	3.2	8.04332	7.80537	7.66849	8.01745	7.77019	7.65501	8.23047	8.03358	7.79217	8.35936
3555	P47755;A8MW68;F8W9N7;B4DE01;B4DG50;C9JUG7;F8WED3	F-actin-capping protein subunit alpha-2	CAPZA2	0.119366	-0.178237	-0.297602	no	no	5.0243e-200	10053000000	15	11	14	14	13	13	14	14	10	11	10	10	10	11	68.9	32.949	286	25	29	27	26	25	25	66.1	67.1	67.1	67.1	66.1	67.1	9.20935	8.99558	8.79904	9.26176	8.98164	8.93874	9.22188	8.98656	8.84343	9.20358
867	Q5HYI7;E9PB57;C9IYU8;Q5HYI7-4;C9JJ95;Q5HYI7-2	Metaxin-3	MTX3	0.119051	0.0789293	-0.0401211	no	no	1.7489e-09	275790000	2	2	2	2	2	2	2	1	2	2	2	2	2	1	6.7	35.093	312	2	2	2	5	2	1	6.7	6.7	6.7	6.7	6.7	3.5	7.74326	7.64816	7.03699	7.45019	7.1682	7.12924	7.68756	7.47564	7.27427	7.96913
3370	P31937	3-hydroxyisobutyrate dehydrogenase, mitochondrial	HIBADH	0.119025	-0.738638	-0.857663	no	no	6.405e-59	1200000000	6	6	5	5	5	5	5	3	5	5	5	5	5	3	31.8	35.329	336	11	6	12	7	7	4	29.5	26.8	29.5	29.5	29.5	15.2	8.28321	7.97088	7.99321	8.19128	7.80488	7.96157	8.3955	8.11281	8.07536	8.30662
2357	O14647;O14647-2;B7Z3I4;Q96IP5;G3V4S8	Chromodomain-helicase-DNA-binding protein 2	CHD2	0.118946	-0.361319	-0.480265	no	no	8.3668e-80	1919900000	12	10	9	9	10	10	10	10	8	8	9	8	8	8	10.2	211.34	1828	13	19	19	19	17	21	8.3	8.3	9.2	8.8	8	8	8.30387	8.08279	7.90477	8.35572	8.03185	8.07639	8.55746	8.32883	8.1695	8.61932
6894	Q9Y4X5;H0Y2Q2	E3 ubiquitin-protein ligase ARIH1	ARIH1	0.118871	0.295252	0.176381	no	no	1.3694e-107	3243100000	17	17	14	12	13	11	13	14	14	12	13	11	13	14	39.1	64.117	557	27	28	26	26	27	26	35	27.6	29.1	28.7	32.5	31.2	8.73585	8.57301	8.23099	8.69657	8.47458	8.29885	8.71726	8.54652	8.22922	8.68881
6893	Q9Y4W2;Q9Y4W2-2;Q9Y4W2-3;Q9Y4W2-4	Ribosomal biogenesis protein LAS1L	LAS1L	0.118707	0.266837	0.148129	no	no	1.0339e-134	2081900000	15	15	9	11	11	10	9	9	9	11	11	10	9	9	31.2	83.064	734	16	19	18	14	18	15	21.4	23.8	24.9	21.8	21.1	18.1	8.43443	8.25176	7.97015	8.54	8.31913	8.1406	8.51447	8.33588	8.0423	8.54143
4849	Q6PL18	ATPase family AAA domain-containing protein 2	ATAD2	0.118657	-0.164909	-0.283566	no	no	1.5948e-08	147620000	2	2	2	1	2	2	2	2	2	1	2	2	2	2	2.5	158.55	1390	3	1	3	2	4	3	2.5	1.4	2.5	2.5	2.5	2.5	7.40052	7.18605	6.99127	6.99818	6.67561	6.71767	7.40836	7.15731	7.05084	7.19218
2238	P52756;H0YGC0;Q59HE6;P52756-5;H0YFW8;P52756-2;P52756-4;C9JFQ5;C9J9P7;F8W910;F5H384;P52756-3;C9JR02;F8WE23	RNA-binding protein 5	RBM5	0.118233	0.23455	0.116317	no	no	9.3887e-28	475830000	9	8	5	5	7	4	7	7	4	5	6	4	6	7	12.5	92.153	815	4	4	7	6	7	7	7.2	7	9.4	5.6	9.7	10.2	7.69948	7.49408	7.27566	7.83882	7.59929	7.46613	8.04552	7.89103	7.52171	7.85077
6076	Q9H1I8;F5H6J9;B1AH60;B1AH59;Q9H1I8-2	Activating signal cointegrator 1 complex subunit 2	ASCC2	0.118135	-0.0607391	-0.178874	no	no	1.173e-54	624740000	9	9	6	7	6	5	5	6	6	7	6	5	5	6	19.2	86.359	757	10	12	9	7	8	11	11.2	15.1	11.2	12.8	8.6	11.2	7.96073	7.71993	7.58976	8.01157	7.71789	7.70306	7.9992	7.77607	7.60316	8.12577
2085	P52630;G3V2M6;G3V268;B4DLC8;G3V4F3	Signal transducer and activator of transcription 2	STAT2	0.118131	0.181902	0.0637711	no	no	8.2904e-72	745440000	11	11	5	6	6	7	5	5	5	6	6	7	5	5	15.4	97.915	851	7	10	7	10	12	7	5.5	6.7	8.3	9	6.1	6	7.91421	7.74809	7.41642	8.03965	7.80107	7.66563	7.98687	7.81366	7.50393	8.27566
604	O96011;B4DXH9	Peroxisomal membrane protein 11B	PEX11B	0.118083	0.135982	0.017899	no	no	3.9541e-31	1675300000	7	7	7	4	5	6	5	5	7	4	5	6	5	5	31.3	28.431	259	10	6	7	7	9	11	31.3	15.8	21.6	27	21.2	21.2	8.42831	8.23104	7.99069	8.24633	8.01824	7.85758	8.21785	8.01355	7.79222	8.31616
2934	P07237;E7EPA8;B4DUA5;F5H8J2;H0Y3Z3	Protein disulfide-isomerase	P4HB	0.118023	0.362418	0.244395	no	no	0	275290000000	43	43	41	41	41	40	40	41	41	41	41	40	40	41	72.4	57.116	508	315	302	336	301	302	295	69.3	69.5	68.1	69.3	69.3	69.3	10.6268	10.4745	10.0976	10.6597	10.471	10.2066	10.7349	10.5713	10.2317	10.6045
5453	Q92696;H0YLH3;B4E069;H0YLG7;H0YMG5;H0YKZ8;H0YKP6	Geranylgeranyl transferase type-2 subunit alpha	RABGGTA	0.118021	-0.333309	-0.45133	no	no	2.8006e-62	1977100000	15	15	7	10	7	9	10	11	7	10	7	9	10	11	32.1	65.071	567	10	13	9	12	11	13	19	19.2	14.5	24.2	22.6	24	8.33798	8.08767	7.97954	8.52148	8.19212	8.24704	8.39536	8.17351	7.99742	8.5668
3987	P98082;P98082-3;P98082-2;D6RFF7;D6RIA5;D6REB1	Disabled homolog 2	DAB2	0.11781	-0.0905825	-0.208392	no	no	8.3631e-159	7666100000	21	21	16	16	16	18	15	15	16	16	16	18	15	15	36.4	82.447	770	34	37	35	32	34	32	26.1	27.4	27.5	33	25.3	23.8	9.01081	8.8064	8.58528	9.13564	8.88647	8.77573	9.14712	8.93773	8.7298	9.03491
875	C9J024;Q7Z6L1-2;Q7Z6L1;F5GX57;C9JUV4;C9J2A1;C9JEV4	Tectonin beta-propeller repeat-containing protein 1	TECPR1	0.117798	-0.548141	-0.665938	no	no	6.2489e-80	599910000	7	7	5	4	4	4	4	5	5	4	4	4	4	5	11.5	129.85	1167	8	7	5	12	6	6	7.5	6.3	6.3	6.3	6.3	9	7.93366	7.66095	7.60233	7.87446	7.55425	7.59181	7.97107	7.71407	7.62103	8.18602
3589	P49257	Protein ERGIC-53	LMAN1	0.117723	0.22329	0.105566	no	no	1.639e-292	38513000000	23	23	17	20	21	20	20	16	17	20	21	20	20	16	48.2	57.548	510	66	70	66	75	68	57	41	40.2	42.5	44.1	46.9	33.3	9.75209	9.59012	9.24527	9.77561	9.5491	9.38459	9.8725	9.71009	9.36663	9.84174
1261	E7ENH9;P53396	ATP-citrate synthase	ACLY	0.117485	-0.443796	-0.56128	no	no	0	710350000	52	1	46	48	49	43	45	47	1	1	1	1	0	1	50.4	126.22	1155	2	1	2	2	0	2	47.1	48.3	49	45.6	46.4	49.7	8.07177	7.81008	7.7275	7.99801	7.67307	7.71964	8.03439	7.70615	7.75897	8.22277
1862	Q8WUM0;F5H5C2;A6NGS4;Q5T8N1;Q5TDI3	Nuclear pore complex protein Nup133	NUP133	0.117459	-0.0497701	-0.167229	no	no	1.0687e-288	11791000000	35	35	22	26	25	27	25	23	22	26	25	27	25	23	33	128.98	1156	62	71	65	72	68	67	23.7	24.9	26.6	26.7	25.1	24.4	9.25588	9.05968	8.8164	9.24647	8.97124	8.91799	9.30812	9.12186	8.85071	9.33548
[truncated: 4,062 more rows]
[truncated: 10 more columns]

## Sheet: si-ATG5 vs si-NC>2SD
Table 5. Supporting Information. SILAC ratio (log2) related to control (si-ATG5 vs si-NC) and its standard deviation (SD) of proteins with increased levels (ratio > 2SD from mean ratio) in si-ATG5 cells.
[truncated: 135 more rows]

[truncated: 1 more sheets: si-ATG5 vs si-NC<2SD]
